# Supplementary material for: Factors associated with quality of life among newly diagnosed acute ischemic stroke patients: a community-based case-control study
Source: PeerJ. 2024 Oct 16;12:e18266. doi: 10.7717/peerj.18266 (PMC11490225; doi:10.7717/peerj.18266)
Supplement: Supplemental Information 1 [file peerj-12-18266-s001.xlsx]

## Sheet: SPSS-Stroke_23
No	Group	Sex	BirthYear	Age	Religion	Maritalstatus	Educationlevel	Occupation	diagnosisYr	UD	HUD1	HUD2	HUD3	HUD4	HUD5	HUD6	Histparalysis	HistCVD	Weight	Height	BMI	Smoking	Alcohol	Circumwaist	QL1	QL2	QL3	QL4	QL5	QL6	QL7	QL8	QL9	QL10	QL11	QL12	QL13	QL14	QL15	QL16	QL17	QL18	QL19	QL20	QL21	QL22	QL23	QL24	QL25
121	1	2	2492	73	1	4	2	1	#NULL!	2	0	0	1	0	0	0	1	1	50	155	20.8117	1	1	86	3	2	3	4	4	4	4	3	4	3	3	3	4	4	4	3	2	3	2	3	3	3	4	4	1
176	1	1	2520	45	1	2	2	1	#NULL!	2	0	0	1	0	0	0	1	1	90	182	27.1706	1	5	92	3	4	5	2	3	3	3	3	5	4	4	4	3	4	4	4	2	3	4	3	3	3	4	4	5
266	1	2	2492	73	1	2	2	6	15	2	0	0	0	1	0	0	1	1	55	150	24.4444	1	1	100	3	5	2	4	4	3	3	3	5	3	4	3	4	4	4	4	4	4	3	3	4	3	4	2	2
267	1	2	2511	54	1	2	4	3	#NULL!	2	0	0	1	1	0	0	1	1	60	157	24.3418	1	1	76	1	3	5	3	4	4	4	4	3	4	3	4	4	3	4	4	4	4	3	2	4	4	4	5	5
268	1	1	2507	58	1	2	2	2	#NULL!	2	0	0	1	0	0	0	1	2	72	172	24.3375	1	3	80	3	5	5	3	5	5	3	5	3	5	2	5	5	5	5	3	3	5	3	3	3	3	5	5	5
269	1	1	2499	66	1	4	4	1	#NULL!	2	1	0	1	0	0	1	2	1	50	140	25.5102	1	1	87	1	3	1	4	3	2	2	3	5	3	3	1	4	4	3	3	3	4	3	3	3	2	3	2	3
270	1	2	2513	52	1	3	2	2	2	2	0	0	1	1	0	0	1	1	48	150	21.3333	1	1	68	4	2	3	2	2	3	3	3	3	3	2	4	5	3	3	3	1	3	4	4	3	3	4	4	4
271	1	2	2500	65	1	2	2	1	2	2	0	0	1	1	0	0	1	1	60	152	25.9695	1	1	76	3	5	4	3	4	4	4	3	5	4	4	4	4	4	4	4	3	4	3	4	4	4	4	4	3
272	1	2	2502	63	1	4	2	1	10	2	0	0	1	1	0	0	1	1	73	155	30.385	1	1	112	3	4	4	3	3	3	4	3	2	3	2	4	4	4	4	4	3	4	3	3	3	4	4	4	5
273	1	1	2493	72	1	2	4	6	6	2	0	0	1	1	0	0	1	1	71	159	28.0843	1	5	82	4	3	4	5	4	4	4	3	3	4	3	4	4	4	4	4	4	4	4	4	4	4	4	4	4
274	1	1	2490	75	1	2	2	1	10	2	0	0	1	1	0	0	1	1	54	165	19.8347	1	3	76	1	3	3	5	5	5	5	5	2	4	3	3	5	4	4	4	3	4	4	5	3	3	4	3	4
275	1	2	2506	59	1	2	7	4	#NULL!	2	0	0	1	0	0	0	1	1	72	164	26.7698	1	4	88	3	3	4	2	4	3	4	4	3	4	3	5	5	5	5	5	4	5	5	2	5	4	4	4	4
276	1	1	2499	66	1	2	5	4	8	2	0	0	1	1	0	0	1	1	65	165	23.8751	1	5	65	3	3	3	4	4	4	5	4	3	3	4	4	4	4	4	4	4	4	4	4	4	4	4	3	4
277	1	1	2504	61	1	2	2	1	3	2	0	0	1	1	0	0	1	1	50	161	19.2894	5	1	76	3	4	3	4	4	4	4	4	5	2	3	3	3	3	3	3	3	3	3	2	4	4	4	4	3
278	1	1	2520	45	1	2	2	2	5	2	0	0	1	1	0	0	1	1	65	165	23.8751	5	5	81	2	4	3	2	3	3	3	3	3	3	2	3	3	3	3	3	4	3	3	3	3	4	3	4	3
279	1	1	2517	48	1	2	1	1	2	2	0	0	1	1	0	0	2	1	88	167	31.5537	3	5	110	1	4	2	4	4	3	3	3	3	3	3	3	3	3	3	3	4	3	4	3	3	4	4	3	3
280	1	1	2509	56	1	5	6	4	#NULL!	2	0	0	1	0	0	0	1	1	67	169	23.4586	2	2	86	3	3	4	4	4	4	4	4	3	4	3	4	3	4	4	4	3	4	4	4	4	4	4	4	2
281	1	1	2506	59	2	2	2	3	5	2	1	0	1	1	0	0	1	1	73	165	26.8136	2	2	96	2	4	2	2	2	2	2	2	2	1	2	4	4	4	3	3	3	3	3	3	3	3	3	1	1
282	1	2	2525	40	1	5	2	2	#NULL!	2	0	0	1	1	0	0	1	1	57	150	25.3333	1	1	74	4	2	4	3	3	4	3	3	4	4	2	4	3	3	4	4	3	4	2	3	4	4	3	4	3
283	1	2	2507	58	1	2	2	1	10	2	0	0	1	1	0	0	2	1	45	150	20	1	5	73	3	4	4	3	3	3	3	3	4	4	3	4	3	3	3	3	3	4	3	4	4	4	4	4	4
284	1	2	2510	55	1	4	2	1	#NULL!	2	0	0	1	0	0	0	1	1	50	165	18.3655	1	5	79	2	4	4	4	4	4	5	3	3	4	3	3	4	5	5	5	4	5	1	4	4	3	5	3	3
285	1	2	2504	61	1	2	2	1	#NULL!	2	0	0	1	0	0	1	1	2	70	150	31.1111	1	1	104	1	4	3	5	5	4	4	4	3	4	3	5	4	4	5	4	5	5	1	5	5	4	5	4	5
286	1	2	2508	57	1	2	2	1	#NULL!	2	0	0	1	0	0	0	1	1	47	160	18.3594	5	1	70	3	4	3	2	2	2	2	4	3	3	3	2	3	3	3	4	4	4	4	3	4	4	3	3	4
287	1	2	2509	56	1	1	6	4	#NULL!	2	0	0	1	0	0	0	1	1	45	155	18.7305	1	1	70	3	5	4	4	4	5	4	4	5	4	2	4	4	5	4	4	4	4	5	5	5	4	4	5	5
288	1	1	2493	72	1	2	2	2	30	2	0	0	1	1	0	0	1	1	64	163	24.0882	3	3	70	3	4	4	5	3	3	3	3	2	4	1	4	4	3	3	3	2	3	3	3	3	4	4	4	2
289	1	1	2511	54	1	2	2	1	5	2	0	0	1	1	0	0	1	1	62	166	22.4996	5	5	75	3	2	4	4	4	4	4	4	3	4	2	4	3	3	4	4	3	4	4	4	4	4	4	4	4
290	1	1	2512	53	1	2	2	1	4	2	1	0	1	1	0	0	1	2	69	155	28.7201	2	5	81	3	3	4	5	4	4	4	4	4	4	3	4	4	3	3	3	2	3	3	3	3	4	4	4	4
291	1	1	2530	35	1	5	5	2	#NULL!	2	0	0	1	0	0	1	1	1	71	165	26.079	5	4	81	3	3	4	5	4	4	4	4	4	4	2	4	3	1	2	2	3	3	4	4	4	4	4	4	4
292	1	2	2497	68	1	2	2	7	#NULL!	2	0	0	1	1	0	0	1	1	48	155	19.9792	1	1	99	3	3	4	4	4	4	4	4	4	3	3	4	4	4	3	3	2	3	3	2	3	4	4	4	3
293	1	1	2507	58	1	2	2	1	#NULL!	2	0	0	1	0	0	0	1	1	63	170	21.7993	2	5	83	3	2	4	4	4	4	4	4	3	4	4	4	4	4	4	4	4	4	4	4	4	4	4	4	4
294	1	1	2511	54	1	2	4	3	#NULL!	2	0	0	1	0	0	0	1	1	68	163	25.5937	5	5	84	4	2	4	4	4	4	4	4	5	4	5	4	4	4	4	4	3	4	4	4	4	4	4	4	4
295	1	2	2501	64	1	2	2	1	#NULL!	2	0	0	1	0	0	0	1	1	51	150	22.6667	1	1	72	5	3	5	5	5	5	5	4	4	4	5	4	3	2	3	3	3	4	4	4	3	4	4	4	3
296	1	2	2509	56	1	5	2	1	1	2	0	0	1	1	0	0	1	1	60	145	28.5375	1	1	86	4	3	4	4	4	4	4	3	4	4	5	4	3	3	3	3	2	3	4	4	4	4	3	4	2
297	1	2	2515	50	1	2	2	3	#NULL!	2	0	0	1	0	0	1	1	1	65	170	22.4913	1	5	76	4	3	4	4	4	4	4	4	5	4	2	4	3	3	4	4	3	4	4	4	4	4	4	4	4
298	1	2	2500	65	2	2	2	1	10	2	0	0	1	1	0	1	1	2	61	159	24.1288	1	5	76	3	2	4	3	4	4	4	3	5	4	2	4	4	3	3	3	3	4	4	4	4	4	4	4	4
299	1	2	2517	48	2	3	4	7	#NULL!	2	0	0	1	0	0	0	1	1	79	160	30.8594	1	5	114	4	3	4	5	4	4	4	4	5	4	4	4	4	4	4	4	3	4	4	4	4	4	4	4	4
300	1	1	2516	49	1	2	2	1	#NULL!	2	0	0	1	0	0	0	1	1	73	170	25.2595	5	4	80	3	2	4	4	4	4	4	4	2	4	2	4	3	4	4	4	4	4	4	4	4	4	5	4	4
301	1	2	2517	48	1	2	2	1	9	2	0	0	1	1	0	1	1	1	62	145	29.4887	1	1	87	3	3	4	1	3	3	3	3	3	3	2	4	4	4	4	4	2	4	4	3	4	4	4	4	3
302	1	2	2537	28	2	5	4	2	#NULL!	2	0	0	1	0	0	0	1	1	43	156	17.6693	1	1	70	4	2	4	4	4	4	4	4	2	4	2	4	4	4	3	3	3	4	4	4	4	4	4	4	4
303	1	2	2494	71	1	4	2	6	1	2	0	0	1	1	0	0	1	1	50	153	21.3593	1	1	74	3	4	4	3	4	4	4	4	5	4	3	4	3	3	4	4	3	4	2	4	4	4	4	4	3
304	1	2	2505	60	1	2	2	1	10	2	0	1	1	1	0	0	2	1	80	143	39.1217	1	5	80	3	4	4	4	3	3	3	3	5	4	4	4	4	4	4	4	3	4	4	4	4	4	4	4	4
305	1	1	2513	52	1	2	2	1	2	2	0	0	1	1	0	0	1	1	67	160	26.1719	2	2	94	3	4	4	3	3	4	3	4	5	4	4	4	4	4	4	4	3	4	4	4	4	4	4	4	3
306	1	1	2498	67	1	2	3	1	#NULL!	2	0	0	1	0	0	0	1	1	78	164	29.0006	2	2	90	5	5	5	5	5	5	5	5	5	5	4	5	5	5	5	5	4	5	5	5	5	5	5	5	5
307	1	1	2502	63	1	2	2	1	#NULL!	2	0	0	1	0	0	0	1	1	47	158	18.8271	2	5	71	5	4	5	5	5	5	5	4	2	5	2	5	4	4	4	4	3	4	3	4	4	4	5	5	4
308	1	1	2502	63	1	2	2	1	6	2	0	0	1	1	0	0	1	1	76	163	28.6048	5	5	90	3	4	4	5	4	4	4	4	5	4	4	4	5	5	4	4	3	4	4	4	4	4	4	4	4
309	1	2	2506	59	1	5	4	7	24	2	0	0	1	1	0	1	1	1	58	156	23.833	2	3	79	3	3	4	2	3	4	4	4	4	4	3	4	3	3	4	4	4	5	5	5	3	4	4	3	3
310	1	1	2507	58	1	5	4	2	#NULL!	2	0	0	1	0	0	0	1	1	57	153	24.3496	5	5	78	4	2	5	4	4	4	4	4	4	5	3	5	5	5	4	4	4	5	4	4	4	5	5	5	5
311	1	2	2502	63	1	2	2	1	#NULL!	2	0	0	1	1	0	1	1	1	51	148	23.2834	1	1	82	5	2	5	4	4	4	5	4	5	5	5	5	4	4	4	4	3	5	4	5	4	5	5	5	4
312	1	1	2513	52	1	2	2	1	#NULL!	2	0	0	1	1	0	0	1	1	54	159	21.3599	1	5	75	4	3	5	5	4	4	4	3	5	4	4	4	5	4	4	4	4	5	2	4	4	5	5	5	4
313	1	2	2519	46	1	2	2	1	#NULL!	2	0	0	1	0	0	0	2	1	58	160	22.6562	1	2	75	4	4	4	4	4	4	4	4	3	4	3	4	4	4	4	4	4	4	4	4	4	4	4	4	4
314	1	2	2511	54	1	2	2	1	7	2	0	0	1	1	0	0	1	1	54	150	24	1	1	80	3	4	3	4	3	4	4	4	4	4	3	4	4	4	4	4	3	4	4	4	4	4	4	5	3
315	1	2	2499	66	1	2	2	8	3	2	1	0	1	1	0	0	1	1	43	150	19.1111	2	3	80	3	3	4	3	3	4	4	4	4	4	2	4	4	4	3	3	3	4	4	4	4	4	4	4	4
316	1	1	2498	67	1	2	2	1	#NULL!	2	0	1	1	0	0	0	1	1	55	165	20.202	4	1	81	3	4	2	2	3	4	3	3	3	3	2	3	2	2	4	4	2	4	1	3	3	4	4	3	5
317	1	2	2513	52	1	2	2	2	5	2	0	0	1	1	0	0	1	1	50	140	25.5102	1	2	80	3	3	3	3	2	3	2	3	2	3	2	4	4	4	4	4	4	4	4	4	4	4	4	4	4
318	1	2	2492	73	1	5	2	6	#NULL!	2	0	0	1	0	0	0	1	1	65	151	28.5075	1	1	86	4	3	4	4	4	4	4	4	3	5	2	3	4	4	4	4	3	4	4	4	4	3	4	3	1
319	1	1	2508	57	1	2	2	1	#NULL!	2	0	0	1	0	0	0	1	1	60	155	24.974	1	5	96	3	3	3	4	3	4	4	4	5	4	4	3	4	4	4	4	3	4	4	3	4	4	4	4	5
320	1	1	2501	64	1	2	2	1	#NULL!	2	0	0	1	0	0	0	1	1	67	165	24.6097	2	5	90	3	4	4	5	3	3	4	3	5	4	4	3	4	3	4	3	4	4	4	3	4	4	4	4	4
321	1	1	2491	74	1	2	2	1	#NULL!	2	0	0	1	0	0	1	1	1	56	160	21.875	1	1	80	4	4	4	2	4	4	4	4	5	4	3	4	4	4	4	4	3	4	3	4	4	4	4	4	5
322	1	1	2494	71	1	2	2	6	#NULL!	2	0	0	1	0	0	0	1	1	53	160	20.7031	1	1	83	4	5	3	4	4	4	3	4	5	4	4	4	4	3	4	4	4	3	4	4	4	3	4	2	5
323	1	1	2498	67	1	2	2	1	20	2	0	0	1	1	0	0	1	1	60	168	21.2585	5	5	101	3	2	4	4	3	3	4	3	3	3	2	3	4	4	3	4	3	3	2	3	4	3	3	4	5
324	1	1	2496	69	1	2	2	1	#NULL!	2	0	0	1	0	0	0	1	1	55	165	20.202	1	5	81	4	3	2	2	3	3	3	3	4	3	2	2	3	3	2	2	3	3	4	3	3	3	3	3	3
325	1	1	2507	58	1	2	2	4	#NULL!	2	0	0	1	0	0	0	2	1	65	165	23.8751	5	1	90	4	3	4	4	4	4	3	3	4	3	4	3	3	3	3	4	3	4	4	4	4	4	4	4	4
326	1	1	2517	48	1	2	5	1	#NULL!	2	0	0	1	0	1	0	1	1	70	170	24.2215	5	5	80	3	5	3	1	3	3	3	3	5	4	4	3	4	4	4	4	3	4	5	4	4	4	3	5	5
327	1	1	2508	57	1	2	2	1	#NULL!	2	0	0	1	0	0	0	1	1	70	159	27.6888	1	5	90	3	4	3	3	3	3	3	3	5	3	4	3	3	3	4	4	4	4	5	4	4	4	4	4	4
328	1	1	2504	61	1	2	2	1	#NULL!	2	0	0	1	0	0	0	1	1	65	176	20.984	1	5	93	3	4	3	3	3	3	3	3	3	3	3	3	3	3	3	5	2	3	3	4	3	4	4	4	4
329	1	1	2501	64	1	2	2	1	#NULL!	2	0	0	1	0	0	0	1	1	40	159	15.8222	5	4	70	4	5	4	5	4	4	4	4	5	4	2	4	4	4	4	4	4	5	4	4	4	4	4	4	4
330	1	2	2511	54	1	2	2	1	4	2	0	0	1	1	0	0	1	1	38	150	16.8889	1	1	70	3	3	4	3	3	4	4	4	3	4	3	3	3	4	4	4	4	3	3	3	3	3	4	4	4
331	1	1	2498	67	1	2	2	1	#NULL!	2	0	0	1	0	0	0	1	1	56	160	21.875	5	4	72	4	3	4	2	4	4	4	4	4	4	2	4	3	4	4	4	1	4	5	4	4	4	4	4	4
332	1	1	2506	59	1	2	2	3	#NULL!	2	0	0	1	0	0	0	1	1	60	173	20.0474	5	5	80	4	4	4	4	4	4	4	4	4	4	3	4	4	3	3	4	4	4	1	4	4	4	4	4	4
333	1	1	2490	75	1	2	2	1	#NULL!	2	0	1	1	0	0	0	1	1	50	168	17.7154	5	5	90	3	3	4	3	4	4	4	4	5	4	4	3	4	4	4	3	3	3	4	4	3	3	3	3	3
334	1	1	2502	63	1	3	4	4	#NULL!	2	0	0	1	0	0	0	1	1	64	162	24.3865	4	4	80	4	3	3	4	4	4	4	4	5	4	4	3	3	3	4	4	2	3	4	3	3	3	2	2	2
335	1	2	2499	66	1	2	2	1	#NULL!	2	0	0	1	0	0	0	1	1	45	150	20	1	1	68	4	4	4	1	4	3	3	4	2	5	5	5	2	2	2	5	5	3	5	3	3	4	4	2	5
336	1	1	2502	63	1	2	7	4	#NULL!	2	0	0	1	0	0	0	1	1	54	165	19.8347	4	4	69	4	3	4	4	4	4	4	4	1	4	1	4	4	4	4	4	3	5	4	3	5	5	5	5	5
337	1	1	2512	53	1	2	2	1	#NULL!	2	0	0	1	0	0	0	1	1	50	170	17.301	5	5	74	4	5	4	3	4	4	4	4	4	4	4	3	3	4	4	4	2	3	5	5	4	4	4	4	5
338	1	1	2508	57	1	2	5	2	#NULL!	2	0	0	1	0	0	0	1	1	57	162	21.7193	5	5	76	5	4	4	4	3	4	3	3	3	4	4	4	4	4	4	4	4	4	5	5	5	5	5	5	4
339	1	1	2499	66	1	2	7	4	15	2	0	0	1	1	0	0	1	1	44	160	17.1875	1	1	81	4	5	4	3	4	4	4	4	3	5	2	3	3	4	4	4	5	3	3	4	4	2	5	1	4
340	1	1	2490	75	1	2	2	4	20	2	1	0	1	1	0	0	1	1	67	170	23.1834	4	4	81	3	4	3	4	3	3	3	3	3	4	5	4	4	4	4	4	2	4	5	3	4	4	4	4	5
341	1	2	2492	73	1	2	2	1	40	2	0	0	1	1	0	0	1	1	48	155	19.9792	1	1	83	4	2	2	2	3	2	2	3	3	3	2	3	3	2	4	4	3	3	5	4	4	3	3	4	4
342	1	1	2504	61	1	2	2	1	10	2	1	0	1	1	0	0	1	1	42	155	17.4818	4	4	73	4	3	2	5	4	4	3	3	4	3	4	3	4	4	4	5	4	3	3	5	4	4	4	3	4
343	1	1	2512	53	1	2	2	3	3	2	0	0	1	1	0	0	1	1	75	169	26.2596	1	4	91	4	3	2	2	4	4	3	5	3	4	2	2	4	3	5	5	3	4	3	5	4	4	5	1	4
344	1	2	2512	53	1	2	2	2	#NULL!	2	0	0	1	1	0	0	1	1	55	150	24.4444	5	1	78	5	4	2	3	2	2	2	2	4	2	3	2	3	4	3	3	4	4	5	3	4	5	3	5	2
345	1	1	2500	65	1	2	2	6	#NULL!	2	0	0	1	0	0	0	1	1	50	174	16.5147	5	4	80	4	2	4	4	4	4	4	4	5	4	2	4	4	4	4	3	4	4	4	4	4	5	4	4	5
346	1	2	2497	68	1	4	2	1	#NULL!	2	0	0	1	0	0	0	1	1	75	155	31.2175	1	1	93	2	3	2	1	2	3	2	3	5	4	3	5	4	4	5	5	3	4	5	2	3	4	3	3	4
347	1	2	2490	75	1	2	2	6	20	2	0	0	1	1	0	0	1	1	70	175	22.8571	1	1	86	4	3	4	5	4	5	4	4	5	4	3	4	4	4	5	5	4	3	5	4	4	5	5	5	4
348	1	2	2535	30	1	5	6	2	#NULL!	2	0	0	1	0	0	0	1	1	60	151	26.3146	1	5	76	4	4	2	1	2	3	2	3	5	3	2	5	5	5	5	5	3	5	5	5	5	5	5	5	5
349	1	1	2502	63	1	2	2	3	14	2	0	0	1	1	0	0	1	1	45	158	18.026	1	4	82	4	5	5	3	4	4	4	4	4	4	3	4	3	4	5	5	5	4	1	5	5	5	4	5	5
350	1	2	2497	68	1	4	2	1	#NULL!	2	0	0	1	0	0	0	1	1	50	140	25.5102	1	1	78	5	4	3	5	3	3	4	4	5	5	4	3	3	4	4	5	3	5	2	3	4	5	3	4	3
351	1	2	2514	51	1	2	4	6	#NULL!	2	0	0	1	0	0	1	1	1	103	187	29.4547	1	5	109	3	3	3	2	3	4	4	3	3	4	3	3	3	3	4	4	5	3	5	2	3	5	5	5	3
352	1	2	2497	68	1	2	2	1	10	2	0	0	1	1	0	0	1	1	50	150	22.2222	1	1	81	3	2	2	2	3	3	3	3	5	2	4	3	3	3	4	4	4	3	3	4	3	4	3	3	4
353	1	1	2514	51	1	2	2	1	#NULL!	2	0	0	1	0	0	0	1	1	76	156	31.2295	1	1	91	3	4	4	3	3	4	4	4	4	3	4	3	4	3	4	4	5	3	3	4	4	3	3	3	4
354	1	2	2492	73	1	4	2	6	#NULL!	2	0	0	1	0	0	0	1	1	50	163	18.8189	1	1	86	3	1	2	2	4	4	4	4	5	4	3	3	3	3	4	4	4	3	5	3	3	3	4	4	1
355	1	1	2495	70	1	2	2	1	#NULL!	2	0	0	1	0	0	0	1	1	45	150	20	4	4	76	2	2	4	2	3	3	4	4	2	3	3	3	4	4	4	4	3	4	4	3	4	5	5	5	4
356	1	2	2494	71	1	2	2	1	20	2	0	0	1	1	0	0	1	1	60	160	23.4375	1	1	81	4	2	4	4	4	4	4	4	2	4	3	4	4	5	4	4	4	5	4	5	4	4	5	4	4
357	1	1	2515	50	1	2	3	1	#NULL!	2	0	0	1	0	0	0	1	1	80	172	27.0416	1	5	91	4	4	4	5	3	3	4	5	5	5	4	4	4	5	4	4	5	4	4	5	5	5	5	5	5
358	1	1	2498	67	1	2	3	1	4	2	0	0	1	1	0	0	1	1	47	150	20.8889	1	2	78	1	4	3	3	4	3	4	4	5	4	4	2	4	4	3	5	3	4	4	3	5	3	5	2	3
359	1	2	2500	65	1	2	2	1	25	2	0	0	1	1	0	0	1	1	53	150	23.5556	1	1	86	3	5	3	1	3	4	4	3	5	4	4	2	3	3	4	3	3	5	1	4	3	4	3	4	4
360	1	2	2501	64	1	2	2	6	10	2	0	0	1	0	0	0	1	1	64	150	28.4444	1	1	96	3	2	3	2	3	3	3	3	3	4	2	3	3	3	4	4	3	4	2	3	2	3	3	3	3
361	1	2	2502	63	1	2	2	1	40	2	0	0	1	1	0	0	1	1	60	165	22.0386	1	1	96	2	2	3	1	3	3	2	3	4	2	5	3	3	2	2	3	4	3	1	3	4	3	4	4	4
362	1	2	2493	72	1	2	2	6	40	2	0	1	1	0	0	0	2	1	45	160	17.5781	1	1	73	3	4	1	1	3	3	4	4	3	3	4	3	4	4	3	3	1	4	5	4	3	4	4	3	4
363	1	1	2512	53	1	1	2	2	1	2	0	0	1	1	0	0	1	1	57	176	18.4013	5	5	73	4	5	4	5	4	4	3	4	5	4	4	4	4	4	5	4	3	4	4	4	5	4	4	5	5
364	1	2	2519	46	1	3	2	1	14	2	0	0	1	1	0	0	1	1	49	149	22.0711	1	5	76	4	1	4	5	3	4	4	4	1	3	3	4	4	3	4	4	2	4	5	4	4	5	4	4	4
365	1	2	2503	62	1	4	2	1	5	2	0	0	1	1	0	0	1	1	55	150	24.4444	1	5	86	3	3	4	3	4	4	4	4	2	3	4	4	4	4	4	4	3	5	4	4	4	3	4	4	4
366	1	1	2512	53	1	2	3	2	#NULL!	2	0	0	1	0	0	0	1	1	60	170	20.7612	1	5	99	4	5	4	4	4	5	5	5	5	4	4	4	4	4	5	5	4	4	5	4	4	4	4	4	4
367	1	2	2509	56	1	4	1	6	5	2	0	0	1	1	0	1	1	1	70	165	25.7117	1	1	101	2	5	2	5	3	2	3	3	5	3	5	3	3	4	4	4	4	5	5	3	4	5	3	2	3
368	1	1	2490	75	1	2	4	1	#NULL!	2	0	0	1	0	0	0	1	1	65	160	25.3906	4	4	86	4	4	4	5	4	4	4	3	3	3	3	3	4	3	3	4	3	4	5	3	4	4	4	3	4
369	1	2	2510	55	1	4	2	1	#NULL!	2	0	0	1	0	0	1	2	1	63	140	32.1429	1	1	86	2	3	2	2	2	3	3	2	2	2	2	2	2	3	2	3	3	2	1	3	3	3	2	3	3
370	1	1	2502	63	1	2	3	1	2	2	0	0	1	0	0	0	1	1	60	156	24.6548	4	4	83	4	4	4	3	4	3	3	4	4	3	1	3	4	3	4	4	1	4	5	4	3	4	4	4	4
371	1	1	2513	52	1	2	6	3	#NULL!	2	0	0	1	0	0	0	1	1	65	165	23.8751	5	5	76	4	3	5	5	4	4	4	4	5	2	2	4	3	4	4	4	5	4	5	3	4	5	5	5	4
372	1	2	2507	58	1	2	2	1	1	2	0	0	1	1	0	1	1	1	70	175	22.8571	1	1	76	3	5	4	1	5	4	3	3	1	3	3	3	4	3	4	3	2	4	3	3	4	5	4	5	3
373	1	2	2496	69	1	4	2	6	19	2	0	0	1	0	0	0	1	1	50	160	19.5312	1	1	91	4	4	3	2	3	3	3	3	4	3	3	4	3	3	2	3	3	3	4	3	3	3	4	4	4
374	1	1	2500	65	1	2	6	4	#NULL!	2	0	0	1	0	0	0	1	1	70	165	25.7117	5	5	86	4	3	3	4	4	4	4	3	2	3	2	4	5	4	3	5	5	4	4	3	4	5	5	5	5
375	1	1	2503	62	1	2	2	6	16	2	0	0	1	0	0	0	1	2	58	160	22.6562	1	5	91	4	3	3	1	2	3	2	2	2	2	3	4	3	4	3	3	2	4	2	2	2	2	2	1	2
376	1	2	2523	42	2	2	2	2	4	2	0	0	1	1	0	0	1	1	53	140	27.0408	1	1	81	4	3	4	3	3	4	4	3	5	3	2	4	3	4	3	4	4	4	3	4	4	3	4	4	4
377	1	1	2502	63	1	2	2	1	#NULL!	2	0	0	1	0	0	0	1	1	45	155	18.7305	5	5	85	4	3	4	5	4	3	4	4	5	2	5	4	4	3	3	4	5	4	3	2	2	4	4	4	4
479	1	1	2502	63	1	2	5	1	#NULL!	2	0	0	1	0	0	0	1	1	67	170	23.1834	1	1	97	4	3	3	5	3	4	4	4	3	3	3	4	3	3	3	3	3	3	4	4	4	4	4	3	4
531	1	2	2539	26	1	1	3	6	#NULL!	2	0	0	1	0	0	0	1	1	82	167	29.4023	1	1	101	3	5	3	3	3	3	3	3	5	3	5	2	2	3	2	2	3	2	2	3	3	3	3	3	3
532	1	1	2518	47	1	2	2	1	4	2	0	0	1	1	0	0	1	1	65	160	25.3906	5	1	81	4	2	4	4	3	3	4	4	5	3	3	4	4	4	5	4	4	4	4	5	5	4	4	4	4
533	1	1	2494	71	1	2	2	3	#NULL!	2	0	0	1	0	0	0	1	1	71	168	25.1559	1	5	91	3	2	3	2	3	3	3	3	3	3	3	3	3	3	3	3	5	4	5	5	5	4	4	4	5
534	1	1	2516	49	1	2	3	1	#NULL!	2	1	0	1	0	0	0	1	1	73	171	24.9649	1	1	91	3	5	3	4	4	4	4	4	4	4	5	4	4	3	4	4	3	4	3	3	4	4	3	4	4
535	1	2	2493	72	1	5	2	6	#NULL!	2	0	0	1	0	0	0	1	1	45	140	22.9592	1	1	81	2	5	1	4	2	2	2	2	5	2	4	2	3	2	3	3	2	2	3	2	2	2	2	2	3
536	1	2	2502	63	1	2	2	6	12	2	0	0	1	0	0	0	1	1	65	160	25.3906	1	1	81	4	3	3	4	4	3	3	4	4	4	2	3	4	3	3	4	4	4	4	3	4	4	4	3	4
537	1	1	2506	59	1	2	6	4	#NULL!	2	0	0	1	0	0	0	1	1	86	173	28.7347	1	1	90	4	5	2	4	4	3	3	3	5	4	5	3	4	3	3	4	5	4	5	4	3	3	4	4	4
538	1	1	2495	70	1	4	2	6	#NULL!	2	0	0	1	0	0	0	1	1	65	170	22.4913	5	1	86	4	3	4	1	3	4	4	4	5	3	5	3	3	4	4	4	2	3	4	3	3	4	4	4	4
539	1	2	2517	48	1	2	2	1	10	2	0	0	1	0	0	0	1	1	65	160	25.3906	1	1	86	3	3	3	1	3	3	3	3	5	3	5	3	3	3	3	4	4	4	5	3	3	3	4	4	4
540	1	1	2506	59	1	2	4	2	#NULL!	2	0	0	1	0	0	0	1	1	55	160	21.4844	5	1	81	4	2	4	4	4	4	4	4	5	4	4	4	4	4	3	4	3	4	5	3	4	3	3	3	4
541	1	1	2521	44	1	2	3	4	#NULL!	2	0	0	1	0	0	0	1	1	53	158	21.2306	5	1	81	3	5	3	2	3	3	3	3	4	3	5	3	3	3	3	3	2	3	4	3	3	3	3	4	4
542	1	1	2512	53	1	2	2	2	#NULL!	2	0	0	1	0	0	0	1	1	63	167	22.5896	1	5	91	3	3	3	1	2	2	2	2	3	3	3	3	3	3	3	3	2	3	4	2	2	2	2	3	3
543	1	1	2512	53	1	2	4	2	#NULL!	2	0	0	1	0	0	0	1	1	72	171	24.623	5	5	96	4	3	4	5	4	4	4	4	4	4	5	4	4	4	4	4	4	3	3	4	4	5	5	4	4
544	1	1	2499	66	1	2	2	1	4	2	0	0	1	0	0	0	1	1	70	168	24.8016	5	1	91	3	2	3	2	3	3	3	3	5	3	4	4	4	2	3	2	2	2	4	2	2	1	1	1	3
545	1	1	2514	51	1	2	2	3	#NULL!	2	0	0	1	0	0	0	1	1	58	160	22.6562	5	5	81	4	2	4	5	4	4	4	4	4	4	2	4	4	4	4	4	4	4	3	3	4	4	4	4	4
546	1	1	2539	26	1	2	3	2	#NULL!	2	0	0	1	0	0	0	1	1	58	170	20.0692	5	1	81	4	4	4	4	4	5	5	5	5	4	3	4	4	3	4	4	4	3	2	3	3	3	4	3	3
547	1	2	2522	43	1	2	2	1	#NULL!	2	0	0	1	0	0	0	1	1	84	155	34.9636	1	1	109	4	1	3	4	4	4	4	3	2	3	1	4	3	4	3	4	4	4	5	4	3	4	4	4	4
548	1	1	2511	54	1	2	2	2	#NULL!	2	0	0	1	0	0	0	1	1	58	165	21.3039	5	5	91	5	5	4	4	4	3	3	4	5	4	5	4	4	3	4	3	3	4	4	4	4	4	4	4	4
549	1	2	2534	31	1	2	4	2	#NULL!	2	0	0	1	0	0	0	1	1	64	152	27.7008	1	1	86	5	3	4	5	4	4	4	4	2	4	2	5	5	5	5	5	5	5	5	5	5	5	5	5	5
550	1	1	2505	60	1	2	4	3	3	2	0	0	1	1	0	0	1	1	52	165	19.1001	5	5	75	2	3	4	1	3	3	3	2	4	3	5	3	3	3	3	3	3	4	5	3	4	4	4	4	4
551	1	1	2514	51	1	5	6	4	3	2	0	0	1	1	0	0	2	1	75	170	25.9516	5	5	101	4	4	4	3	4	4	4	3	5	4	3	4	4	4	3	4	4	4	3	4	4	4	4	5	4
552	1	2	2514	51	1	2	2	1	1	2	0	0	1	1	0	0	1	1	37	145	17.5981	5	5	80	3	3	3	3	3	3	3	3	2	3	2	2	3	2	3	3	3	3	2	3	3	3	2	3	4
553	1	2	2517	48	1	2	2	7	#NULL!	2	0	0	1	0	0	0	1	1	59	150	26.2222	1	1	77	4	2	4	4	4	4	4	4	2	4	2	4	4	5	4	5	4	2	3	3	3	3	3	2	3
554	1	1	2490	75	1	4	2	6	5	2	0	0	1	1	0	1	1	1	75	155	31.2175	1	1	83	5	3	4	5	4	4	4	4	3	4	3	5	4	4	4	5	5	4	5	4	3	3	4	4	3
555	1	1	2544	21	1	1	4	2	#NULL!	2	0	0	1	0	0	0	1	1	65	170	22.4913	1	1	86	4	3	4	5	5	4	4	4	3	4	3	5	5	5	5	5	5	5	5	4	5	5	4	4	4
556	1	2	2506	59	1	2	1	6	8	2	0	0	1	1	0	0	2	1	45	150	20	1	1	85	4	3	2	1	3	3	3	3	3	4	4	4	3	4	3	3	3	4	4	3	3	4	4	4	4
696	1	1	2502	63	1	2	2	6	#NULL!	2	0	0	1	0	0	1	1	1	46	155	19.1467	4	4	95	3	5	3	3	3	3	3	3	3	3	4	4	3	3	4	3	4	3	4	3	4	3	3	3	3
697	1	1	2491	74	1	2	2	3	#NULL!	2	0	0	1	0	0	0	1	1	51	170	17.6471	5	5	81	4	4	3	3	4	4	4	4	5	3	4	4	4	3	3	4	3	3	3	4	4	3	3	3	4
698	1	1	2501	64	1	2	2	6	#NULL!	2	0	0	1	0	0	0	1	1	65	162	24.7676	5	1	82	4	4	4	4	4	4	4	4	5	4	5	3	3	3	4	3	3	3	4	3	3	3	3	3	3
699	1	1	2524	41	1	5	5	6	#NULL!	2	0	0	1	0	0	0	2	1	65	170	22.4913	1	1	93	3	4	4	3	3	3	3	3	4	3	4	3	3	3	3	3	3	4	3	3	3	4	4	3	4
700	1	2	2520	45	1	2	2	1	4	2	0	0	1	1	0	0	1	1	65	155	27.0552	1	1	90	4	2	4	2	3	3	3	3	5	4	4	3	4	3	3	3	4	5	5	3	4	5	4	5	4
701	1	1	2500	65	1	2	2	1	#NULL!	2	0	1	1	0	0	0	1	1	45	165	16.5289	1	1	80	4	4	4	5	3	4	4	4	4	4	4	3	3	4	3	3	3	3	4	4	3	5	4	5	4
702	1	1	2494	71	1	2	2	1	#NULL!	2	0	0	1	0	0	0	1	1	67	170	23.1834	5	1	80	4	3	4	5	4	4	4	4	4	3	2	4	4	3	4	4	3	4	4	3	4	4	5	5	5
703	1	1	2525	40	1	2	3	1	#NULL!	2	0	1	1	0	0	0	1	1	65	171	22.2291	4	1	75	4	4	3	4	5	5	5	5	5	4	5	4	4	4	3	3	4	4	3	4	4	3	4	5	5
704	1	1	2496	69	1	2	2	6	#NULL!	2	0	0	1	0	0	0	1	1	70	165	25.7117	1	1	105	4	3	3	4	3	4	4	4	4	3	3	4	3	3	4	3	3	4	4	4	4	3	3	3	3
705	1	2	2510	55	1	2	2	6	#NULL!	2	0	0	1	0	0	0	1	1	50	165	18.3655	1	1	80	4	3	3	2	4	3	3	3	4	3	4	3	3	4	3	3	4	4	4	4	3	3	4	4	4
706	1	1	2492	73	1	2	2	1	6	2	0	0	1	1	0	0	1	1	65	150	28.8889	1	1	103	4	4	3	4	3	3	4	3	5	4	5	3	4	3	4	3	3	4	3	3	4	4	4	4	4
707	1	2	2516	49	1	2	2	1	10	2	0	1	1	1	0	0	1	1	42	155	17.4818	1	1	75	3	4	3	4	4	3	3	3	5	4	5	4	3	3	4	3	3	4	4	3	3	3	3	3	4
708	1	2	2493	72	1	4	2	6	9	2	0	0	1	1	0	0	1	1	105	150	46.6667	1	1	110	4	2	3	3	4	3	3	3	3	3	3	4	3	3	4	3	4	3	4	4	4	3	4	4	4
1	2	1	2491	74	1	2	2	1	15	2	0	0	0	1	0	1	2	1	77	173	25.7276	2	5	92	4	3	4	5	4	4	4	4	4	4	4	4	4	4	4	4	4	5	5	5	5	4	4	5	4
2	2	1	2491	74	1	2	2	1	3	2	0	0	0	1	0	1	2	1	66	165	24.2424	2	2	91	3	5	3	4	4	4	4	4	4	3	3	3	4	4	4	3	3	3	3	4	4	3	4	3	2
3	2	1	2497	68	1	2	2	1	5	2	0	0	0	1	0	0	1	1	67	167	24.0238	3	1	75	4	2	3	4	4	4	4	4	4	4	3	3	4	4	4	4	4	4	4	4	3	3	4	4	4
4	2	1	2495	70	1	2	2	2	14	2	0	0	0	1	0	1	1	1	50	165	18.3655	1	1	80	3	4	3	4	4	2	4	4	4	4	5	3	2	4	4	4	3	4	4	4	4	4	5	5	2
5	2	1	2493	72	1	4	2	1	7	2	0	0	0	1	0	0	1	1	60	160	23.4375	3	1	89	4	1	3	3	4	2	4	4	5	4	3	2	5	4	3	4	5	4	4	4	4	4	4	5	3
6	2	1	2494	71	1	2	2	1	10	2	0	0	0	1	0	0	2	1	50	160	19.5312	2	5	84	3	4	3	2	3	3	3	4	3	3	4	3	3	3	3	4	3	3	3	3	4	4	4	3	3
7	2	1	2495	70	1	2	2	1	10	2	0	0	0	1	0	0	2	1	72	165	26.4463	2	5	80	3	3	3	2	2	2	3	4	3	3	2	3	3	3	3	4	3	3	3	3	4	4	4	3	3
8	2	1	2516	49	1	2	5	1	5	2	0	0	0	1	0	0	1	1	73	170	25.2595	1	5	81	4	4	3	4	3	4	4	4	5	4	4	4	4	4	4	4	4	3	4	4	4	4	4	4	4
9	2	2	2517	48	1	2	2	1	13	2	0	0	0	1	0	0	1	1	52	158	20.83	1	2	84	3	2	2	2	4	4	4	4	3	4	2	4	4	5	5	5	4	4	4	4	4	4	4	5	4
10	2	1	2520	45	1	2	4	1	3	2	0	0	0	1	0	0	1	1	57	165	20.9366	1	5	78	4	5	4	3	4	4	4	4	5	4	5	4	4	4	5	4	4	3	5	4	4	2	4	5	4
11	2	1	2521	44	1	1	5	2	3	2	0	0	0	1	0	0	1	1	100	165	36.7309	1	5	120	2	3	4	3	3	3	3	3	5	3	2	4	4	3	3	4	3	4	4	4	3	3	4	4	4
12	2	1	2518	47	1	1	2	1	7	2	0	0	0	1	0	0	1	1	58	160	22.6562	5	5	76	5	2	5	5	5	5	4	4	5	5	3	4	4	4	4	4	3	4	5	5	5	5	5	5	5
13	2	2	2499	66	1	2	2	1	19	2	0	0	0	1	0	1	1	1	50	154	21.0828	1	1	91	3	3	3	4	3	4	3	4	5	3	3	4	4	4	3	4	3	4	4	3	4	4	4	4	3
14	2	2	2495	70	1	4	2	1	13	2	0	0	0	1	0	0	1	1	48	154	20.2395	1	1	71	3	5	3	4	4	4	4	4	2	4	4	4	4	4	4	4	3	4	4	4	4	3	3	4	3
15	2	2	2495	70	1	2	2	1	17	2	0	0	0	1	0	0	1	1	68	153	29.0487	1	1	89	1	4	3	5	4	4	3	5	3	4	4	4	4	5	4	4	3	5	4	4	4	3	4	2	3
16	2	2	2496	69	1	2	2	1	17	2	0	1	0	0	0	1	1	1	50	140	25.5102	1	1	95	3	5	3	4	5	5	5	5	3	4	4	4	4	4	4	3	3	4	4	4	4	3	4	4	1
17	2	2	2496	69	1	2	2	6	6	2	0	0	0	1	0	1	1	1	49	140	25	1	5	98	4	5	4	5	4	4	4	5	5	5	5	4	4	4	4	2	3	4	4	3	4	4	5	5	1
18	2	2	2496	69	1	2	2	1	7	2	0	0	0	1	0	0	1	1	53	145	25.2081	1	1	89	3	2	5	3	5	5	5	5	2	5	2	5	5	5	5	5	4	5	5	5	5	5	5	5	1
19	2	2	2500	65	1	4	3	1	7	2	0	0	0	1	0	0	1	1	64	150	28.4444	1	1	94	3	4	3	5	4	4	4	4	3	3	4	4	3	3	4	4	3	4	3	5	4	4	4	5	2
20	2	1	2496	69	1	2	2	1	10	2	0	0	0	1	0	0	2	1	59	165	21.6713	5	1	87	4	4	4	4	4	4	4	4	4	4	4	4	4	4	4	4	3	5	4	4	4	4	4	4	4
21	2	1	2496	69	1	1	4	1	3	2	0	0	0	1	0	1	1	1	90	186	26.0146	1	1	108	3	3	3	3	3	3	3	3	5	3	3	2	4	4	3	3	1	5	4	3	3	4	4	4	4
22	2	1	2498	67	1	2	2	1	7	2	0	0	0	1	0	0	1	1	74	170	25.6055	1	1	103	5	5	5	5	5	5	5	4	5	5	3	5	5	5	5	5	3	5	4	4	5	5	5	5	4
23	2	1	2498	67	1	2	2	1	4	2	0	0	0	1	0	0	1	1	65	166	23.5883	1	1	92	4	3	3	5	5	3	5	4	3	4	2	4	4	4	4	4	4	5	4	4	4	2	4	3	4
24	2	1	2501	64	1	2	2	1	4	2	0	0	0	1	0	0	1	1	85	170	29.4118	1	2	105	1	3	2	4	3	3	3	3	3	4	3	3	3	3	4	4	4	3	3	3	3	4	4	4	3
25	2	1	2498	67	1	4	2	2	15	2	0	0	0	1	0	0	1	1	73	175	23.8367	2	5	100	3	3	4	5	5	4	4	4	4	4	4	5	5	5	4	4	3	4	4	4	4	4	4	4	4
26	2	2	2511	54	1	2	3	1	6	2	0	0	0	1	0	0	1	2	71	150	31.5556	1	1	96	4	4	4	3	4	4	5	4	4	1	4	3	4	3	4	5	4	3	4	3	4	4	4	3	3
27	2	2	2507	58	1	4	2	1	10	2	0	0	0	1	0	0	1	1	60	151	26.3146	1	1	98	2	5	5	5	5	5	4	5	4	5	4	5	5	3	5	5	4	5	5	4	5	5	5	1	1
28	2	2	2509	56	1	1	4	1	6	2	0	0	0	1	0	0	1	1	54	153	23.0681	1	1	83	4	5	5	5	4	4	5	4	3	5	3	5	4	5	5	5	5	5	3	3	5	5	5	5	1
29	2	2	2515	50	1	2	4	1	2	2	0	0	0	1	0	0	1	1	64	150	28.4444	1	1	99	2	5	1	2	2	2	2	2	4	2	4	3	3	4	3	3	2	3	3	3	3	3	3	3	2
30	2	2	2510	55	1	1	2	7	10	2	0	0	0	1	0	1	1	1	57	154	24.0344	1	2	85	4	4	4	4	3	4	4	4	4	4	5	4	3	3	3	3	3	4	4	4	4	4	4	4	3
31	2	2	2515	50	1	4	4	1	1	2	0	0	0	1	0	0	1	1	72	156	29.5858	1	1	93	2	4	4	4	4	4	4	5	5	4	4	4	4	4	4	4	4	3	4	4	4	4	4	4	4
32	2	2	2509	56	1	2	3	1	11	2	0	0	0	1	0	0	1	1	51	153	21.7865	1	1	76	4	4	4	4	4	4	4	4	5	4	5	4	4	4	4	4	4	4	3	4	4	4	4	4	4
33	2	2	2511	54	1	2	4	1	13	2	0	0	0	1	0	0	1	1	54	159	21.3599	1	1	83	3	5	5	5	5	5	5	5	5	5	5	5	5	3	4	4	3	2	4	4	4	5	5	5	3
34	2	2	2509	56	1	2	2	1	15	2	0	0	0	1	0	0	1	1	75	150	33.3333	1	1	95	4	4	3	4	4	4	4	4	5	4	5	4	3	4	4	4	4	3	3	4	4	3	4	5	5
35	2	2	2522	43	1	2	2	1	3	2	0	0	0	1	0	1	1	1	69	152	29.865	1	1	102	3	4	4	4	3	4	3	4	5	3	4	4	5	3	3	4	3	3	2	4	4	4	5	5	1
36	2	2	2503	62	1	4	2	1	3	2	0	0	0	1	0	0	1	1	48	147	22.213	1	1	90	4	5	4	4	4	4	4	4	5	4	5	4	4	4	4	4	4	4	4	4	4	3	4	4	3
37	2	1	2502	63	1	1	2	1	2	2	0	1	0	1	0	0	1	1	35	155	14.5682	1	1	65	2	5	2	5	5	5	5	5	4	5	3	5	5	5	5	5	4	5	5	4	4	1	1	1	3
38	2	2	2501	64	1	4	2	1	15	2	0	1	0	1	0	0	1	1	60	156	24.6548	1	1	89	5	4	3	3	3	4	4	4	2	4	3	4	4	3	4	4	4	3	3	1	3	4	1	4	1
39	2	2	2504	61	1	2	2	2	3	2	0	0	0	1	0	0	1	1	61	160	23.8281	1	1	83	4	5	4	4	4	4	4	4	5	4	5	4	4	3	4	4	3	4	4	4	4	4	4	4	3
40	2	2	2504	61	1	4	2	1	8	2	0	0	0	1	0	0	1	1	85	160	33.2031	1	5	117	3	4	4	4	4	4	4	4	4	4	4	4	5	5	4	4	4	4	4	4	4	4	4	4	4
41	2	2	2502	63	1	1	1	1	10	2	0	0	0	1	0	0	1	1	54	159	21.3599	1	1	97	3	5	3	3	3	3	3	3	4	4	3	3	3	3	3	3	3	3	3	4	4	3	4	4	2
42	2	2	2494	71	1	4	2	1	13	2	0	0	0	1	0	0	1	1	48	145	22.83	1	1	100	5	5	4	5	5	5	5	5	5	4	5	4	4	4	4	3	2	4	4	4	3	4	5	4	3
43	2	2	2503	62	1	2	2	6	3	2	0	0	0	1	0	0	1	2	63	150	28	1	1	103	4	5	2	4	3	2	4	4	5	4	5	4	4	4	4	4	2	5	4	4	4	3	3	4	3
44	2	1	2494	71	1	1	2	1	3	2	0	0	0	1	0	0	1	1	44	145	20.9275	1	1	77	4	5	4	5	5	5	4	4	5	4	5	5	5	5	5	5	5	5	4	2	5	5	5	5	1
45	2	1	2503	62	1	2	2	1	4	2	0	0	0	1	0	0	1	1	64	159	25.3155	1	1	90	5	5	3	5	3	5	4	4	5	4	4	4	3	4	5	5	4	5	3	5	5	5	5	5	3
46	2	1	2503	62	1	2	4	1	6	2	0	0	0	1	0	0	1	1	80	173	26.7299	1	1	92	4	3	3	4	4	4	4	4	3	4	4	3	4	4	4	4	3	4	4	4	4	5	4	5	3
47	2	1	2501	64	1	2	2	1	20	2	0	0	0	1	0	0	1	1	63	160	24.6094	1	1	84	5	5	3	5	5	5	5	5	5	4	5	5	4	3	4	5	5	3	4	5	3	3	4	5	3
48	2	1	2504	61	1	2	2	1	5	2	0	0	0	1	0	0	1	1	63	161	24.3046	5	5	89	4	4	4	4	4	3	4	4	5	3	4	3	4	4	4	4	3	4	4	2	4	4	4	4	4
49	2	1	2507	58	1	2	3	1	18	2	0	0	0	1	0	0	1	1	62	175	20.2449	1	1	73	4	5	4	4	4	4	4	4	5	4	4	3	4	4	4	4	3	4	4	1	4	4	4	4	4
50	2	1	2505	60	1	2	2	1	3	2	0	0	0	1	0	0	1	1	73	160	28.5156	1	5	92	3	4	4	4	4	4	3	3	5	3	4	3	3	3	3	3	4	3	3	3	4	4	4	4	3
51	2	1	2511	54	1	2	2	1	4	2	0	0	0	1	0	0	1	1	65	160	25.3906	1	1	91	2	3	3	5	4	3	3	3	3	4	4	3	3	4	4	4	3	5	3	3	2	3	3	5	3
52	2	2	2491	74	1	2	2	2	5	2	0	0	0	1	0	1	1	1	44	155	18.3143	1	1	65	4	4	4	3	3	3	3	3	3	3	3	4	3	3	4	4	3	3	4	3	3	4	4	3	3
53	2	2	2491	74	2	3	2	1	20	2	0	0	0	1	0	0	2	1	50	150	22.2222	1	1	97	1	2	3	3	5	5	5	5	3	4	3	4	4	4	4	4	2	4	4	5	4	3	5	3	3
54	2	2	2493	72	1	2	2	7	10	2	0	0	0	1	0	0	1	1	59	150	26.2222	1	1	93	4	4	3	5	5	4	4	4	4	2	5	2	3	3	3	4	4	3	3	3	3	3	2	2	1
55	2	2	2492	73	1	4	2	3	2	2	0	0	0	1	0	0	1	1	65	150	28.8889	1	1	96	5	2	1	5	4	3	4	4	1	2	2	4	3	2	3	4	4	3	3	1	3	4	1	3	1
56	2	2	2492	73	1	4	2	1	2	2	0	0	0	1	0	0	1	1	55	159	21.7555	1	1	98	4	2	4	5	4	4	5	5	5	4	3	5	5	5	5	5	3	5	5	4	5	5	4	5	3
57	2	2	2493	72	1	2	2	3	8	2	0	0	0	1	0	0	1	2	60	148	27.3923	1	1	96	4	2	4	5	4	4	5	5	5	4	3	5	5	5	5	5	3	5	5	4	5	5	4	5	3
58	2	2	2495	70	1	2	2	1	4	2	0	0	0	1	0	1	1	1	54	145	25.6837	1	1	98	3	2	3	4	3	3	3	3	2	4	3	3	3	3	3	4	3	4	4	4	3	3	4	4	4
59	2	2	2492	73	1	2	2	1	2	2	0	0	0	1	1	1	1	1	65	156	26.7094	1	1	100	3	3	3	4	3	3	3	3	4	4	2	3	3	3	4	3	3	3	4	4	4	3	3	3	4
60	2	2	2491	74	1	2	2	1	2	2	0	0	0	1	0	0	1	1	52	150	23.1111	1	1	85	3	5	4	4	3	4	4	4	3	4	4	4	4	4	4	4	4	4	4	4	4	4	4	4	3
61	2	2	2492	73	1	3	2	3	10	2	0	1	0	1	0	0	1	1	60	155	24.974	1	1	97	5	2	4	5	5	5	5	5	2	5	3	5	5	5	5	5	4	5	5	4	5	4	5	1	3
62	2	2	2509	56	1	2	1	1	6	2	0	0	0	1	0	0	1	1	62	145	29.4887	1	5	97	5	2	3	4	4	4	4	4	5	4	3	4	4	4	4	4	4	4	4	4	4	4	4	4	3
63	2	2	2495	70	1	4	2	2	20	2	0	0	0	1	0	0	1	1	51	155	21.2279	1	1	78	4	3	4	4	4	4	4	4	2	4	2	4	3	3	4	4	3	4	1	4	4	4	4	4	3
64	2	2	2491	74	1	4	2	6	18	2	0	0	0	1	0	0	1	1	42	149	18.9181	1	1	84	4	3	2	4	4	4	4	4	3	3	3	4	4	4	4	4	4	4	3	4	4	4	4	3	1
65	2	2	2495	70	1	4	2	6	20	2	0	0	0	1	0	0	1	1	53	155	22.0604	1	1	99	4	2	2	4	4	4	4	4	3	3	3	4	4	4	4	4	4	4	3	4	4	4	4	3	1
66	2	2	2494	71	2	2	2	6	10	2	0	0	0	1	0	1	1	1	75	156	30.8185	1	2	112	4	2	2	4	4	4	4	4	2	3	2	4	4	4	4	4	4	4	3	4	4	4	4	3	1
243	2	2	2495	70	1	4	3	1	33	2	0	0	0	1	0	0	1	1	73	162	27.8159	1	1	104	4	5	4	4	3	4	4	4	3	4	4	4	4	4	4	4	3	4	4	3	4	3	4	4	2
244	2	2	2505	60	1	2	2	1	14	2	0	0	0	1	0	0	1	1	51	155	21.2279	1	5	86	3	2	2	4	3	3	3	4	3	3	4	3	3	3	4	3	2	3	3	4	4	4	4	4	4
245	2	2	2513	52	1	1	2	2	14	2	0	0	0	1	0	0	1	1	48	155	19.9792	1	1	73	3	3	3	3	3	4	4	5	2	3	4	3	4	3	3	3	3	4	3	3	3	4	5	5	3
246	2	2	2505	60	1	2	2	1	8	2	0	0	0	1	0	0	1	1	71	150	31.5556	1	3	109	4	2	4	4	4	4	4	4	5	4	3	4	4	4	4	4	3	1	1	3	4	4	4	4	4
247	2	2	2507	58	1	4	2	1	1	2	0	0	0	1	0	0	1	1	73	160	28.5156	1	2	100	1	3	5	5	5	4	4	4	3	4	5	4	4	4	4	4	3	4	4	4	4	4	5	5	2
248	2	2	2512	53	1	3	6	7	1	2	0	0	0	1	0	1	1	1	70	158	28.0404	1	2	93	4	5	4	3	4	4	4	4	2	4	2	4	4	3	4	4	2	4	3	4	4	5	4	4	4
249	2	2	2511	54	1	2	2	1	8	2	0	0	0	1	0	0	1	1	62	149	27.9267	1	2	90	4	3	4	5	5	4	4	4	5	5	4	5	4	4	4	4	4	5	5	5	5	5	5	5	4
250	2	2	2511	54	1	2	2	1	10	2	0	0	0	1	0	0	1	1	45	145	21.4031	1	1	70	4	3	4	4	5	4	4	4	4	4	3	4	4	4	4	4	4	5	5	5	5	5	5	5	3
251	2	1	2515	50	1	2	3	1	6	2	0	0	0	1	0	0	1	1	82	163	30.863	5	5	105	3	3	3	4	4	4	4	5	4	5	3	4	4	4	4	4	3	4	4	4	4	4	5	4	4
252	2	1	2517	48	1	2	5	5	1	2	0	0	0	1	0	0	2	1	65	165	23.8751	5	4	82	3	5	3	3	4	3	3	4	3	4	3	4	4	4	3	4	4	3	3	3	4	3	4	4	4
253	2	2	2516	49	1	2	4	1	10	2	0	0	0	1	0	0	1	1	50	165	18.3655	1	1	73	4	5	4	4	4	4	4	4	3	4	3	4	3	3	4	3	3	4	3	3	4	3	5	3	3
255	2	2	2507	58	1	4	4	7	3	2	0	0	0	1	0	0	2	1	70	150	31.1111	1	2	84	3	5	4	4	4	4	4	1	5	4	5	4	3	4	5	4	4	3	4	3	4	4	4	1	4
257	2	2	2504	61	2	2	2	2	12	2	0	0	0	1	0	0	1	1	76	170	26.2976	1	5	103	3	2	3	4	4	3	4	4	5	3	3	3	4	4	3	2	4	4	4	4	4	4	4	4	3
258	2	2	2513	52	2	2	4	3	11	2	0	0	0	1	0	0	1	1	70	165	25.7117	1	1	104	4	5	3	5	4	4	4	4	5	4	3	3	4	4	4	4	3	4	3	4	3	4	4	5	3
259	2	2	2514	51	2	2	3	3	1	2	0	0	0	1	0	0	1	1	87	165	31.9559	1	5	101	4	5	4	4	4	4	4	4	5	3	3	3	3	3	4	3	3	4	3	4	4	4	3	3	3
260	2	1	2516	49	2	2	5	3	5	2	0	0	0	1	0	0	1	1	83	175	27.102	1	5	87	4	3	4	4	4	4	4	4	3	3	3	4	4	4	4	4	3	4	4	4	4	3	3	5	3
261	2	1	2507	58	2	1	2	1	3	2	0	0	0	1	0	0	1	1	66	170	22.8374	1	1	89	3	3	4	4	4	4	4	4	4	4	3	3	4	4	4	3	4	4	5	4	4	4	4	5	3
262	2	1	2504	61	1	1	2	2	6	2	0	0	0	1	0	0	1	1	66	162	25.1486	1	1	89	3	3	4	4	4	4	4	4	5	4	3	3	4	4	4	4	3	4	5	4	4	4	4	4	4
263	2	1	2500	65	2	2	2	3	5	2	0	0	0	1	0	0	1	1	70	170	24.2215	1	1	86	4	4	4	4	4	4	4	4	3	4	2	3	4	4	3	4	4	3	5	4	4	4	4	4	3
264	2	2	2495	70	2	4	2	7	10	2	0	0	0	1	0	0	1	1	59	146	27.6787	1	1	89	4	3	4	4	4	3	4	4	5	4	3	3	4	4	4	4	3	4	4	4	4	4	4	4	3
265	2	2	2507	58	2	3	2	3	4	2	0	0	0	1	0	0	1	1	55	147	25.4524	1	1	60	3	3	3	4	4	4	4	4	2	2	2	3	3	3	3	4	3	4	4	4	4	4	4	4	3
433	2	1	2520	45	1	2	4	1	2	2	0	0	0	1	0	0	1	1	115	185	33.6012	1	5	98	4	3	4	4	4	4	4	4	5	4	3	4	4	4	4	4	4	4	4	4	4	4	4	4	4
434	2	1	2521	44	1	5	6	5	2	2	0	0	0	1	0	0	1	1	74	165	27.1809	1	5	84	2	3	2	3	4	3	4	4	3	4	2	4	4	4	4	3	4	4	3	4	3	3	4	4	3
435	2	1	2506	59	1	2	2	1	10	2	0	0	0	1	0	0	1	1	96	160	37.5	1	1	100	4	2	4	2	4	4	4	4	3	3	2	4	3	3	4	4	3	4	4	4	4	3	4	4	4
436	2	1	2490	75	1	2	2	1	3	2	0	0	0	1	0	0	1	1	66	175	21.551	1	1	82	4	4	4	3	4	4	4	4	4	4	5	4	4	4	4	4	5	4	4	4	4	4	4	4	4
437	2	1	2493	72	1	4	2	1	10	2	0	0	0	1	0	0	1	1	50	160	19.5312	1	1	80	4	5	4	4	4	4	4	4	4	4	4	4	4	2	4	4	3	4	5	4	4	4	4	4	4
438	2	2	2496	69	1	2	2	3	22	2	0	1	0	1	0	0	1	1	45	150	20	1	1	89	3	5	4	4	4	4	3	4	3	3	4	4	4	4	3	3	4	4	3	3	4	4	4	4	3
439	2	1	2509	56	1	2	4	1	8	2	0	0	0	1	0	0	1	1	61	160	23.8281	3	5	92	3	3	4	5	5	5	5	5	3	5	3	5	5	5	5	5	5	5	5	5	4	5	5	5	5
440	2	2	2520	45	1	2	2	1	7	2	0	0	0	1	0	0	1	1	45	143	22.006	1	1	76	3	3	3	4	3	3	3	4	5	4	5	4	3	3	4	5	3	4	4	5	4	4	4	4	4
441	2	2	2492	73	1	4	2	1	5	2	0	0	0	1	0	0	2	1	55	150	24.4444	1	1	81	3	5	3	4	3	3	3	3	5	3	5	3	3	3	3	3	4	3	2	3	3	3	3	3	3
442	2	2	2499	66	1	2	2	1	19	2	1	0	0	1	0	0	1	1	52	156	21.3675	1	1	85	3	5	4	5	4	3	4	5	5	5	4	5	4	4	4	4	5	5	5	3	4	5	4	5	3
443	2	2	2519	46	1	2	2	1	8	2	0	0	0	1	0	0	1	1	75	165	27.5482	1	1	107	3	3	5	3	4	4	4	4	3	4	2	4	4	5	5	5	4	5	4	4	5	5	3	5	4
444	2	2	2517	48	1	2	2	1	3	2	0	0	0	1	0	0	2	1	58	158	23.2335	1	1	87	3	3	3	4	4	4	4	4	3	4	2	3	5	4	5	5	4	5	4	4	4	5	4	5	3
445	2	1	2508	57	1	2	2	1	5	2	0	0	0	1	0	0	1	1	55	160	21.4844	2	1	87	4	3	3	3	3	3	3	2	5	2	3	2	2	1	1	4	3	3	2	2	3	4	4	3	3
446	2	1	2498	67	1	2	4	1	2	2	0	0	0	1	0	0	1	1	64	165	23.5078	1	1	88	4	3	1	5	5	5	5	5	5	1	4	5	5	5	5	5	4	4	5	5	4	4	4	4	4
447	2	1	2503	62	1	2	2	1	6	2	0	0	0	1	0	0	1	1	65	160	25.3906	1	5	91	3	3	4	1	5	4	4	4	3	4	3	4	4	4	4	4	2	4	4	3	4	4	1	4	3
448	2	1	2506	59	1	2	4	1	1	2	0	0	0	1	0	0	2	1	51	155	21.2279	5	2	89	3	5	4	1	4	4	4	4	5	4	3	5	5	5	5	4	4	4	4	4	4	4	4	4	3
449	2	1	2516	49	1	1	5	1	5	2	0	0	0	1	0	0	1	1	75	165	27.5482	1	5	93	3	2	3	2	5	5	4	2	2	1	2	4	4	4	4	4	4	4	4	5	5	5	4	5	3
450	2	1	2510	55	1	1	2	1	9	2	0	0	0	1	0	1	2	1	62	165	22.7732	1	5	82	4	4	4	5	4	4	4	4	5	4	2	3	4	3	3	3	3	4	4	4	4	4	3	3	3
451	2	1	2497	68	1	2	2	1	2	2	0	0	0	1	0	0	1	1	63	160	24.6094	1	1	98	3	5	3	3	3	3	3	3	5	3	2	3	3	3	3	3	3	3	3	4	4	4	4	4	4
452	2	2	2509	56	1	4	2	1	10	2	0	0	0	1	0	0	1	1	57	155	23.7253	1	1	82	2	5	4	2	3	3	3	3	5	4	2	3	4	4	3	3	2	4	3	3	3	3	4	4	3
453	2	1	2505	60	1	1	2	2	8	2	0	0	1	1	0	0	1	1	65	160	25.3906	1	1	88	3	5	3	4	4	3	5	4	2	3	3	3	3	3	3	3	3	4	4	3	4	4	4	4	4
454	2	1	2506	59	1	2	3	1	3	2	0	0	0	1	0	1	1	1	62	165	22.7732	3	3	83	4	3	4	4	4	4	4	4	3	4	2	4	4	4	4	4	4	5	4	4	4	4	4	4	4
455	2	2	2513	52	1	2	2	1	1	2	0	0	0	1	0	0	1	1	63	155	26.2227	1	1	101	4	5	4	3	5	5	5	5	5	4	2	5	5	5	5	4	4	4	4	3	5	5	5	5	3
456	2	2	2519	46	1	4	2	1	10	2	0	0	0	1	0	0	1	1	50	155	20.8117	1	1	75	3	4	3	3	4	3	4	4	5	4	3	4	4	4	3	4	3	4	3	3	4	4	4	4	3
457	2	2	2509	56	1	2	2	7	5	2	0	0	0	1	0	0	1	1	72	155	29.9688	1	5	96	4	5	4	4	4	4	4	4	5	4	2	4	4	3	4	4	3	4	2	3	4	4	4	4	3
458	2	1	2504	61	1	2	2	2	20	2	0	0	0	1	0	0	1	1	60	160	23.4375	1	1	79	3	2	3	4	4	4	4	4	4	3	2	3	3	4	4	4	4	3	3	3	4	4	4	3	3
459	2	1	2498	67	1	2	2	1	10	2	0	0	0	1	0	0	1	1	69	172	23.3234	3	3	89	3	3	4	4	4	4	3	3	5	4	4	4	4	4	4	4	3	4	4	3	3	4	3	4	3
460	2	2	2492	73	1	2	2	1	9	2	0	0	0	1	0	0	1	1	43	145	20.4518	1	1	74	3	5	3	2	3	3	3	3	3	3	3	3	4	4	4	4	2	4	4	4	4	4	4	4	3
461	2	2	2491	74	1	2	2	1	4	2	0	0	0	1	0	0	1	1	57	156	23.4221	1	1	70	3	5	4	4	4	4	3	3	5	4	3	3	4	4	4	4	3	4	4	4	4	4	3	4	3
462	2	2	2498	67	1	2	1	1	6	2	0	0	0	1	0	0	1	1	60	150	26.6667	1	1	77	3	2	4	5	5	4	4	4	3	4	4	4	4	4	4	4	4	4	4	4	4	3	4	4	3
463	2	1	2495	70	1	2	2	1	7	2	0	0	0	1	0	0	1	1	54	160	21.0937	1	1	79	3	3	4	4	4	4	4	4	4	4	5	4	4	4	4	4	4	5	4	4	4	4	4	4	4
464	2	2	2494	71	1	3	2	1	20	2	0	0	1	1	0	0	1	1	53	140	27.0408	1	1	99	3	3	4	4	4	4	4	3	5	4	3	4	4	3	3	4	3	3	3	4	4	4	4	4	3
465	2	2	2507	58	1	2	4	7	10	2	0	0	0	1	0	0	1	1	59	155	24.5578	1	1	83	3	5	3	4	4	4	4	3	4	4	3	4	4	4	3	3	4	3	4	4	4	4	4	4	3
466	2	1	2500	65	1	2	2	1	10	2	0	0	0	1	0	0	1	1	61	170	21.1073	1	1	82	3	5	3	4	4	4	4	3	5	3	4	3	3	3	4	4	4	3	3	4	4	4	4	4	3
467	2	2	2512	53	1	3	2	1	10	2	0	0	0	1	0	0	1	1	66	160	25.7812	1	1	80	3	5	4	4	4	4	3	3	2	3	2	3	3	4	4	4	4	3	4	4	2	4	4	3	3
468	2	2	2514	51	1	2	3	1	8	2	0	0	0	1	0	0	1	1	52	147	24.064	1	1	78	1	4	3	4	4	5	3	3	5	3	4	3	3	3	4	3	3	4	3	3	3	3	3	4	3
469	2	2	2506	59	1	2	2	3	7	2	0	0	0	1	0	0	1	1	59	150	26.2222	1	1	87	2	5	3	4	3	3	3	3	5	3	4	3	3	3	3	3	2	3	4	4	3	3	4	4	3
470	2	2	2503	62	1	2	2	1	3	2	0	0	0	1	0	0	1	1	70	155	29.1363	1	1	103	3	3	3	4	4	4	3	3	3	3	2	3	3	3	4	4	3	4	4	4	4	3	3	5	3
471	2	1	2494	71	1	2	2	1	5	2	0	0	0	1	0	0	1	1	62	158	24.8358	1	1	89	4	4	4	4	4	4	4	4	2	3	2	3	4	4	4	4	3	5	4	4	4	4	4	4	3
472	2	2	2518	47	1	2	2	1	5	2	0	0	0	1	0	0	1	1	47	158	18.8271	1	1	69	3	5	3	4	3	3	3	4	3	4	3	3	3	4	4	4	4	5	3	4	4	3	4	3	3
473	2	2	2502	63	1	2	2	1	15	2	0	1	0	1	0	0	1	1	64	150	28.4444	1	1	97	3	4	3	2	3	3	3	4	2	3	3	3	4	4	4	4	3	4	4	4	4	4	4	4	3
474	2	1	2495	70	1	4	2	1	1	2	0	0	0	1	0	0	1	1	55	163	20.7008	1	1	80	3	2	3	4	3	3	3	3	3	3	3	3	3	3	3	3	3	3	3	3	2	2	3	2	3
475	2	1	2491	74	1	2	2	1	3	2	0	0	0	1	0	0	1	1	73	163	27.4756	1	1	92	3	3	3	4	3	3	3	3	4	3	3	3	3	3	4	4	3	4	3	3	3	3	3	5	3
476	2	2	2497	68	1	2	2	1	50	2	0	0	0	1	0	0	1	1	50	155	20.8117	1	1	83	3	2	3	4	3	3	3	3	2	3	2	4	4	3	3	3	3	4	3	4	4	4	4	3	3
477	2	2	2505	60	1	4	2	1	10	2	0	0	0	1	0	0	1	1	58	155	24.1415	1	1	89	4	3	3	4	3	3	3	3	2	3	2	3	3	3	3	3	3	4	3	3	3	3	3	4	3
478	2	2	2510	55	1	2	2	1	2	2	0	0	0	1	0	0	1	1	61	165	22.4059	1	1	93	3	3	4	4	4	4	4	3	3	4	3	4	4	4	4	3	3	4	4	4	4	4	4	4	3
480	2	1	2503	62	1	2	2	1	10	2	0	0	0	1	0	1	1	1	75	175	24.4898	5	1	86	5	3	4	3	5	5	5	4	3	5	3	4	4	5	5	5	3	5	4	5	5	5	5	5	5
481	2	2	2494	71	1	2	2	1	4	2	0	0	0	1	0	0	1	1	56	151	24.5603	1	1	94	3	4	3	5	3	3	3	3	4	4	3	4	4	4	4	4	3	5	4	4	4	3	3	3	4
597	2	2	2500	65	1	2	2	1	20	2	0	0	0	1	0	0	1	1	63	168	22.3214	1	1	100	3	4	2	2	3	3	3	3	4	3	4	3	3	3	3	3	3	4	3	3	3	3	3	3	3
598	2	2	2504	61	1	2	2	1	10	2	0	0	0	1	0	0	1	1	60	165	22.0386	1	1	94	3	5	3	3	4	3	3	3	5	4	5	4	4	4	4	3	4	4	2	3	3	4	4	4	4
599	2	2	2514	51	1	2	2	1	1	2	0	0	0	1	0	0	1	2	65	140	33.1633	1	1	96	3	5	3	2	3	3	3	3	5	3	4	3	3	3	3	3	4	4	3	3	3	4	3	4	4
600	2	2	2502	63	1	2	2	1	5	2	0	0	0	1	0	0	1	1	40	148	18.2615	1	1	84	3	5	3	4	3	3	4	5	5	2	4	3	4	4	3	3	3	3	4	3	3	2	4	3	3
601	2	2	2519	46	1	2	2	1	1	2	0	0	0	1	0	0	1	1	73	160	28.5156	1	1	94	5	2	3	4	4	4	4	4	3	5	5	4	4	4	4	4	4	5	4	3	3	3	5	3	3
602	2	2	2502	63	1	1	2	1	20	2	0	0	0	1	0	0	1	1	61	165	22.4059	1	1	83	4	3	3	4	3	3	4	5	4	3	2	3	3	4	4	4	4	4	4	3	3	4	4	4	2
603	2	2	2513	52	1	1	2	1	12	2	0	0	0	1	0	0	1	1	74	158	29.6427	1	1	98	3	3	3	3	5	4	5	5	2	3	2	3	4	4	4	4	4	5	5	4	4	4	4	4	3
604	2	2	2514	51	1	2	2	1	10	2	0	0	0	1	0	0	1	1	54	160	21.0937	1	1	75	4	3	4	2	4	4	4	4	5	4	5	4	4	4	4	4	2	4	4	4	5	4	4	5	2
605	2	2	2505	60	1	2	2	1	3	2	0	0	0	1	0	0	1	1	54	155	22.4766	1	1	85	4	4	3	5	5	4	4	4	5	4	5	4	5	3	4	4	4	5	5	3	4	4	4	4	3
606	2	2	2505	60	1	2	2	3	2	2	0	0	0	1	0	0	1	1	71	170	24.5675	1	5	90	3	3	4	5	5	5	5	5	5	5	5	4	5	4	5	5	3	4	5	5	5	5	5	5	3
607	2	2	2501	64	1	2	2	1	5	2	0	0	0	1	0	0	1	1	72	150	32	1	1	97	4	4	4	4	3	4	4	4	3	4	4	4	4	4	4	3	4	4	4	4	4	4	4	4	3
608	2	2	2507	58	1	2	2	1	10	2	1	0	0	1	0	0	1	1	54	150	24	1	1	84	3	4	4	4	4	4	4	4	4	4	5	4	4	4	4	4	4	4	4	4	4	4	4	4	3
609	2	2	2511	54	1	1	2	1	10	2	0	0	0	1	0	0	1	2	65	150	28.8889	1	1	86	4	5	4	4	4	4	4	4	4	4	5	4	4	4	4	4	4	4	4	4	4	4	4	4	3
610	2	2	2493	72	1	2	2	1	4	2	0	0	0	1	0	0	1	1	53	150	23.5556	1	1	97	4	4	2	2	4	3	3	3	4	3	4	3	3	4	4	3	3	4	4	3	3	3	3	3	3
611	2	2	2503	62	1	2	2	1	7	2	0	0	0	1	0	0	1	1	46	153	19.6506	1	1	83	4	5	3	4	4	4	4	4	5	4	5	3	3	3	4	3	3	3	4	3	4	3	3	3	3
612	2	2	2500	65	1	4	2	1	10	2	0	0	0	1	0	0	1	1	44	155	18.3143	1	1	85	4	5	3	4	4	4	4	4	5	4	5	3	3	4	4	4	3	4	4	3	3	3	3	3	3
613	2	2	2513	52	1	2	3	3	10	2	0	0	0	1	0	0	1	1	95	170	32.872	2	5	119	4	4	5	5	5	5	5	5	3	4	3	4	4	4	4	4	3	5	5	5	5	5	5	5	2
614	2	2	2515	50	1	2	2	1	5	2	0	0	0	1	0	0	1	1	75	175	24.4898	1	1	87	4	5	4	4	4	4	4	4	5	4	4	4	4	4	4	4	4	4	4	4	4	4	4	4	3
615	2	2	2512	53	1	2	2	1	3	2	0	0	0	1	0	0	1	1	69	170	23.8754	1	5	82	4	4	3	4	4	4	4	4	5	3	5	3	3	4	4	3	3	3	4	3	3	3	3	3	3
616	2	2	2511	54	1	2	2	1	2	2	0	0	0	1	0	0	1	1	62	159	24.5243	1	5	87	3	3	3	4	4	3	4	3	3	3	2	4	4	5	4	3	3	5	4	4	3	4	5	4	4
617	2	2	2510	55	1	4	2	1	3	2	0	0	0	1	0	0	2	1	43	158	17.2248	5	1	76	2	5	2	3	3	3	4	4	5	3	5	3	3	3	3	4	3	4	3	2	3	4	3	3	4
618	2	1	2514	51	1	1	2	1	3	2	0	0	0	1	0	1	2	1	74	169	25.9095	1	1	87	3	2	4	4	4	4	3	5	5	3	2	3	4	4	4	4	5	5	4	4	4	4	5	4	2
619	2	1	2514	51	1	2	2	1	13	2	0	0	0	1	0	0	1	1	50	160	19.5312	3	3	72	3	2	4	5	3	4	4	4	3	3	4	3	4	3	3	3	3	3	5	4	3	3	3	3	3
620	2	2	2497	68	1	2	2	1	4	2	0	0	0	1	0	0	1	1	62	150	27.5556	1	1	89	3	3	3	4	3	3	4	4	4	3	3	3	4	4	3	4	3	4	2	2	4	3	3	3	4
621	2	1	2495	70	1	2	2	2	10	2	0	0	0	1	0	0	1	1	55	160	21.4844	1	1	75	4	4	4	4	4	4	4	4	4	4	5	4	4	4	4	4	3	4	4	4	4	4	4	4	4
622	2	2	2495	70	1	4	2	1	6	2	0	0	0	1	0	0	1	1	43	150	19.1111	1	1	78	3	3	3	4	4	3	3	3	5	3	5	3	4	4	3	3	3	3	3	4	3	4	4	4	3
623	2	2	2496	69	1	2	2	3	5	2	0	0	0	1	0	0	1	1	57	155	23.7253	1	1	92	3	2	3	4	4	4	4	3	3	4	4	4	3	3	4	3	3	4	3	4	3	3	3	3	4
624	2	1	2494	71	1	2	2	1	4	2	0	0	0	1	0	0	1	1	60	154	25.2994	3	3	72	4	3	3	4	4	4	4	4	4	4	3	4	3	3	4	4	4	4	4	4	4	3	4	3	3
625	2	2	2496	69	1	4	2	1	15	2	0	0	0	1	0	0	1	1	40	140	20.4082	1	5	78	4	2	3	4	4	4	4	4	3	4	2	4	4	4	4	4	4	4	4	4	4	4	4	4	3
626	2	2	2495	70	1	1	2	1	7	2	0	0	0	1	0	0	1	1	55	150	24.4444	1	1	85	4	4	4	5	4	4	5	5	3	4	2	4	4	5	4	4	2	4	5	4	5	5	5	5	2
627	2	2	2500	65	2	2	2	1	23	2	0	0	0	1	0	0	1	1	55	160	21.4844	1	5	78	2	5	4	2	4	2	5	5	4	3	4	3	4	4	4	4	3	4	5	4	4	4	4	5	3
628	2	2	2499	66	1	4	2	3	20	2	0	0	0	1	0	0	1	1	88	160	34.375	1	3	105	4	5	4	5	4	4	4	4	1	4	5	4	4	4	4	4	3	5	4	4	4	4	4	4	5
629	2	2	2495	70	1	2	2	3	7	2	0	0	0	1	0	0	1	1	65	150	28.8889	1	1	98	3	5	4	4	4	4	4	4	1	4	5	4	1	1	4	4	4	4	5	4	4	4	4	4	4
630	2	2	2509	56	1	4	2	1	12	2	0	0	0	1	0	0	1	1	72	150	32	1	3	100	3	5	3	4	3	4	3	3	5	4	3	4	2	2	3	4	3	4	4	4	3	3	4	3	3
631	2	1	2499	66	1	2	2	1	36	2	0	0	0	1	0	0	1	1	78	170	26.9896	3	3	102	4	3	4	4	4	4	4	4	4	4	2	4	4	4	4	4	4	4	4	4	4	4	3	4	2
632	2	2	2498	67	1	2	2	1	16	2	0	0	0	1	0	0	1	1	66	155	27.4714	1	5	98	2	5	2	4	3	4	4	4	5	4	4	4	4	4	5	5	3	5	5	4	5	4	5	5	3
633	2	1	2496	69	1	5	2	2	10	2	0	0	0	1	0	0	1	1	60	160	23.4375	2	5	90	3	4	4	4	5	4	4	4	3	4	5	5	4	4	5	5	4	4	4	4	5	4	4	4	3
634	2	2	2494	71	1	4	6	4	6	2	0	0	0	1	0	0	1	1	61	160	23.8281	1	1	90	4	3	4	5	5	5	5	5	2	4	5	5	5	4	5	5	4	5	5	5	5	5	5	5	2
635	2	2	2509	56	1	2	4	1	5	2	0	0	0	1	0	0	1	1	63	160	24.6094	1	1	94	3	3	4	3	5	3	5	5	3	4	5	3	3	3	3	3	3	4	3	3	3	5	5	5	3
636	2	2	2510	55	1	2	2	1	4	2	0	0	0	1	0	1	2	1	58	150	25.7778	1	5	92	3	3	3	4	4	3	4	4	3	4	3	3	3	3	3	4	3	4	4	3	4	5	4	5	4
637	2	2	2505	60	1	4	2	1	7	2	0	0	0	1	0	0	1	1	72	150	32	1	1	101	4	3	3	4	4	3	3	3	3	3	3	3	4	4	3	3	3	4	3	3	3	3	3	3	3
638	2	2	2505	60	1	2	2	1	10	2	0	0	0	1	0	0	1	1	68	155	28.3039	1	1	104	3	2	4	3	4	3	3	3	5	4	4	4	4	4	3	3	3	3	2	3	4	4	4	4	4
639	2	2	2512	53	1	4	2	7	5	2	0	0	0	1	0	0	1	1	67	155	27.8876	1	1	100	3	3	2	5	3	3	4	4	4	3	3	4	3	3	3	3	3	4	4	5	5	5	3	5	3
640	2	2	2512	53	1	1	2	1	7	2	0	0	0	1	0	0	1	1	58	145	27.5862	1	1	98	4	2	5	3	5	4	5	5	3	4	3	4	4	4	4	5	3	4	5	4	5	5	5	5	3
641	2	2	2508	57	1	2	2	1	10	2	0	0	0	1	0	0	1	1	53	161	20.4467	1	1	82	3	5	4	3	4	4	3	5	5	4	2	4	4	4	4	5	4	3	4	4	4	4	4	4	5
642	2	2	2491	74	1	4	2	1	8	2	0	0	0	1	0	0	1	1	55	152	23.8054	1	1	96	4	3	3	3	3	3	4	4	4	3	4	3	3	3	4	3	2	5	3	4	4	3	3	3	4
643	2	1	2504	61	1	2	2	1	6	2	0	0	0	1	0	0	1	1	52	173	17.3745	2	5	76	3	5	3	5	5	5	5	1	3	1	2	5	4	5	5	2	5	4	4	5	5	4	5	4	5
644	2	2	2495	70	1	2	2	1	24	2	0	0	0	1	0	0	1	1	43	149	19.3685	1	1	76	4	5	3	5	5	3	5	4	5	3	5	5	5	5	3	5	3	5	4	5	5	5	5	4	3
645	2	2	2495	70	1	4	2	6	10	2	0	0	0	1	0	1	1	1	70	150	31.1111	1	1	106	4	2	2	2	5	3	4	5	2	5	2	5	5	5	3	5	3	5	5	5	5	5	4	4	3
646	2	2	2508	57	1	2	2	1	10	2	0	0	0	1	0	0	2	1	56	165	20.5693	1	1	77	2	2	3	4	3	3	4	4	2	3	2	3	3	3	3	4	4	4	3	3	4	3	3	3	5
647	2	2	2490	75	1	1	4	1	5	2	0	0	0	1	0	0	1	1	60	160	23.4375	1	1	90	5	4	3	2	5	4	3	3	2	3	5	3	4	4	3	4	4	5	5	3	4	3	3	3	4
648	2	2	2505	60	1	2	2	1	23	2	0	0	0	1	0	0	1	2	78	155	32.4662	1	1	105	3	5	3	4	3	3	4	4	5	3	5	3	3	3	4	4	3	4	3	3	4	3	3	3	3
649	2	2	2504	61	1	2	2	1	5	2	0	0	0	1	0	0	1	1	75	157	30.4272	1	1	99	3	4	3	3	3	3	4	4	4	3	1	3	3	3	3	4	3	4	3	3	4	3	3	3	4
650	2	2	2516	49	1	2	2	1	10	2	0	0	0	1	0	0	1	1	59	158	23.634	1	1	94	3	3	4	4	4	4	3	3	5	3	5	3	3	3	3	4	3	4	3	2	4	3	3	3	3
67	3	1	2496	69	1	2	2	1	12	2	0	0	0	1	0	0	1	1	70	165	25.7117	3	3	100	5	2	4	4	5	4	4	4	2	4	2	4	4	5	4	5	3	4	3	4	3	4	4	5	2
68	3	1	2493	72	1	2	2	1	10	2	0	0	0	1	0	0	1	1	55	165	20.202	1	1	91	3	2	4	3	4	4	5	4	2	5	2	4	5	5	3	5	5	5	3	5	5	5	5	5	3
69	3	1	2515	50	1	2	2	1	1	2	0	0	0	1	0	0	1	1	45	168	15.9439	3	5	90	4	2	4	4	4	4	4	4	2	3	2	4	4	4	4	5	4	4	4	4	4	4	5	5	3
70	3	1	2518	47	1	2	6	4	1	2	0	0	0	1	0	0	1	1	70	155	29.1363	1	5	94	4	3	4	4	4	4	4	4	4	5	2	4	4	4	4	5	3	4	4	2	5	2	5	5	4
71	3	1	2522	43	1	1	3	1	5	2	0	0	0	1	0	0	1	1	53	165	19.4674	1	5	79	3	2	4	4	3	4	3	3	2	4	2	4	4	4	4	3	4	4	3	3	4	4	4	4	3
72	3	2	2499	66	1	3	2	1	30	2	0	0	0	1	0	0	1	1	51	150	22.6667	5	5	84	1	5	5	5	5	5	5	1	2	5	2	5	5	5	5	5	2	5	5	5	5	5	5	5	1
73	3	2	2496	69	1	2	2	1	5	2	0	1	0	1	0	0	1	1	56	155	23.3091	1	1	102	3	2	2	3	3	3	3	3	2	3	2	3	4	3	4	4	3	2	3	3	3	4	4	4	3
74	3	2	2499	66	1	2	2	1	19	2	0	1	0	1	0	0	1	1	62	160	24.2187	1	1	97	3	2	3	4	3	3	3	3	2	3	2	3	4	4	4	4	3	4	3	4	4	3	4	3	4
75	3	1	2499	66	1	1	2	1	7	2	0	0	0	1	0	0	1	1	82	159	32.4354	1	1	111	2	2	4	5	4	5	4	3	3	2	2	3	3	2	3	4	3	2	2	3	2	2	2	2	1
76	3	1	2497	68	1	3	2	1	20	2	0	0	0	1	0	0	1	1	64	170	22.1453	1	1	82	3	2	3	5	5	5	5	5	1	5	2	5	3	4	3	5	3	5	2	3	5	5	4	5	5
77	3	1	2498	67	1	2	2	1	9	2	0	0	1	1	0	0	1	1	60	157	24.3418	1	1	102	1	2	3	4	2	4	2	3	3	3	3	3	4	4	4	4	3	5	5	4	4	4	4	4	4
78	3	1	2500	65	1	2	4	1	5	2	0	0	0	1	0	0	1	1	73	165	26.8136	3	2	72	1	4	1	2	2	2	2	3	3	3	3	2	2	2	4	4	4	4	4	4	4	1	2	2	2
79	3	1	2498	67	1	2	2	1	1	2	0	0	0	1	0	0	1	1	42	170	14.5329	5	2	72	3	3	3	3	3	3	3	3	2	3	2	3	3	3	4	4	4	4	4	4	4	4	3	4	3
80	3	1	2499	66	1	2	2	1	15	2	0	0	0	1	0	0	1	1	60	165	22.0386	5	5	83	4	1	4	5	5	4	4	4	3	4	2	4	4	4	3	3	3	3	4	4	4	4	4	4	4
81	3	1	2498	67	1	2	2	1	5	2	0	0	0	1	0	0	1	1	65	165	23.8751	5	5	81	4	3	4	4	4	4	4	4	5	4	4	4	4	4	4	4	3	4	4	4	4	4	4	4	4
82	3	2	2509	56	1	2	2	3	15	2	0	0	0	1	0	0	1	1	83	150	36.8889	2	5	115	4	2	4	4	4	4	4	4	2	4	2	4	4	4	4	4	4	4	4	4	4	4	4	4	4
83	3	2	2513	52	1	4	2	1	10	2	0	0	0	1	0	0	1	1	65	154	27.4077	1	1	98	3	3	3	3	5	3	5	5	4	3	3	3	5	5	3	4	3	4	5	4	4	4	5	5	5
84	3	2	2511	54	1	3	4	1	2	2	0	0	0	1	0	0	1	1	56	152	24.2382	1	1	78	3	2	4	4	3	4	3	4	1	4	1	4	4	4	4	4	2	4	4	4	3	4	4	4	3
85	3	2	2514	51	1	2	2	2	3	2	0	0	0	1	0	0	2	2	70	155	29.1363	1	1	89	3	4	5	2	4	5	5	5	4	5	4	5	5	5	5	5	3	5	5	4	5	5	5	5	5
86	3	2	2510	55	1	5	2	1	5	2	0	0	0	1	0	0	1	1	47	150	20.8889	1	1	87	4	1	5	4	4	4	4	4	2	4	2	4	4	3	4	4	2	2	4	4	4	5	5	5	3
87	3	2	2513	52	1	2	2	1	20	2	0	0	0	1	0	0	1	1	64	154	26.986	1	1	95	3	2	3	5	5	5	5	5	4	5	2	4	5	5	5	5	4	5	3	5	5	5	5	5	5
88	3	2	2505	60	1	2	2	1	10	2	0	0	0	1	0	0	1	1	57	154	24.0344	1	1	91	3	3	3	3	3	4	3	4	2	4	2	4	4	4	4	4	5	5	3	3	4	3	4	5	4
89	3	2	2507	58	1	2	2	1	5	2	0	0	0	1	0	0	1	1	49	150	21.7778	1	5	78	5	4	5	5	5	5	5	5	3	1	4	5	5	5	5	5	5	5	5	5	5	5	5	5	5
90	3	2	2510	55	1	2	2	1	30	2	0	0	0	1	0	0	1	1	65	155	27.0552	1	1	98	5	3	5	5	5	4	5	5	3	5	2	5	5	5	5	5	3	5	4	5	5	5	5	5	1
91	3	2	2504	61	1	1	2	1	5	2	0	0	0	1	0	0	1	1	50	153	21.3593	1	1	86	4	2	1	5	5	5	4	4	2	3	3	3	3	3	3	3	3	3	3	3	3	3	2	4	4
92	3	2	2502	63	1	4	2	1	15	2	0	0	0	1	0	0	2	1	60	160	23.4375	1	1	102	3	2	4	4	3	3	3	4	3	4	2	4	3	3	3	3	3	3	4	3	3	3	4	4	4
93	3	2	2502	63	1	2	2	1	10	2	0	0	0	1	0	0	1	1	46	153	19.6506	1	1	84	1	3	4	2	5	5	5	5	1	4	2	4	5	5	5	5	5	5	5	4	5	2	5	2	3
94	3	2	2503	62	1	4	2	1	13	2	0	0	0	1	0	0	1	1	60	155	24.974	1	1	103	3	3	4	3	3	3	3	5	2	4	2	4	4	5	4	4	3	5	3	5	3	5	5	5	4
95	3	2	2499	66	1	4	2	1	10	2	0	0	0	1	0	0	1	1	68	160	26.5625	1	1	102	4	2	5	5	5	5	5	5	4	5	3	5	5	5	5	5	4	5	4	4	5	5	5	5	3
96	3	2	2503	62	1	5	2	1	3	2	1	0	0	1	0	0	1	1	62	158	24.8358	1	1	97	4	4	4	3	4	4	5	5	3	5	2	4	4	5	3	3	3	4	5	4	4	3	4	5	1
97	3	2	2504	61	1	2	2	1	6	2	0	0	0	1	0	0	1	1	60	161	23.1473	1	1	92	3	4	4	4	4	4	5	4	3	4	2	4	3	3	4	4	4	4	3	4	4	4	4	4	3
98	3	2	2500	65	1	2	2	1	15	2	0	0	0	1	0	0	2	1	69	150	30.6667	1	1	117	3	4	4	3	3	3	3	3	4	4	3	3	3	3	4	4	4	4	3	3	3	3	4	4	4
99	3	2	2503	62	1	2	2	1	13	2	0	0	0	1	0	0	1	1	63	152	27.268	1	1	89	4	2	4	4	4	4	4	4	3	4	2	4	4	4	4	4	3	4	4	4	3	4	4	4	3
100	3	2	2507	58	1	2	2	1	14	2	0	0	0	1	0	1	1	1	65	162	24.7676	3	3	93	4	2	4	5	3	5	3	3	2	5	2	5	5	5	5	5	3	5	5	5	5	4	5	5	3
101	3	2	2500	65	1	4	2	1	3	2	0	0	0	1	0	0	1	1	62	155	25.8065	1	1	91	3	2	5	5	3	5	3	5	3	5	3	5	5	4	4	4	2	5	4	4	5	5	3	5	2
102	3	2	2494	71	1	4	2	1	2	2	0	0	0	1	0	0	1	1	59	150	26.2222	1	1	94	5	2	4	3	4	4	4	4	2	4	3	4	5	3	4	5	2	4	4	3	5	2	5	5	5
103	3	2	2499	66	1	4	2	1	10	2	0	0	0	1	0	0	1	1	67	157	27.1816	1	1	112	3	1	3	3	4	2	4	5	2	4	2	3	4	4	4	4	2	4	4	4	4	3	4	4	2
104	3	2	2503	62	1	4	2	1	16	2	0	0	0	1	0	0	1	1	58	155	24.1415	1	1	90	3	3	3	5	3	3	3	2	3	4	2	3	2	3	3	4	3	4	3	3	5	4	4	4	3
105	3	2	2495	70	1	4	2	1	13	2	0	0	0	1	0	0	1	1	63	164	23.4236	1	1	94	1	2	5	1	1	4	4	5	2	5	3	5	5	4	3	4	3	4	1	3	4	4	4	4	3
106	3	1	2502	63	1	2	2	1	2	2	0	0	0	1	0	0	1	1	60	157	24.3418	2	5	86	3	3	2	3	3	3	3	3	4	3	4	3	3	3	3	3	3	3	3	3	3	3	3	3	3
107	3	1	2503	62	1	2	2	1	3	2	0	0	0	1	0	0	2	1	63	160	24.6094	2	5	91	2	3	3	3	3	3	3	3	2	3	3	3	3	3	3	3	3	2	3	3	3	3	3	4	3
108	3	1	2503	62	1	2	2	1	2	2	0	0	0	1	0	0	1	1	70	170	24.2215	5	3	92	2	2	3	4	3	3	4	4	4	3	4	4	4	4	4	4	4	4	2	3	3	4	4	4	3
109	3	1	2507	58	1	2	3	1	2	2	0	0	0	1	0	0	1	1	53	160	20.7031	3	1	76	3	3	3	2	3	3	3	3	3	3	3	3	3	3	3	3	4	3	3	3	3	4	4	4	3
110	3	1	2500	65	1	4	2	1	10	2	0	0	0	1	0	0	1	1	60	173	20.0474	1	5	72	5	3	5	5	5	5	4	4	3	5	3	5	4	4	4	4	4	4	4	5	5	5	4	5	5
111	3	1	2511	54	1	2	2	1	2	2	0	0	0	1	0	0	1	1	59	164	21.9363	3	3	80	3	3	2	4	4	3	4	4	3	3	3	3	4	4	4	3	4	4	4	4	4	3	4	3	3
112	3	1	2506	59	1	2	3	1	4	2	0	0	0	1	0	0	1	1	60	155	24.974	3	3	87	4	4	3	4	4	4	4	4	3	4	4	4	4	4	4	4	3	4	4	4	4	4	4	4	4
113	3	2	2492	73	2	2	2	1	15	2	0	0	0	1	0	0	1	1	52	150	23.1111	1	5	81	4	2	4	4	4	4	4	4	3	4	3	4	3	2	4	4	3	4	2	4	4	4	4	4	4
114	3	2	2495	70	1	4	2	7	29	2	0	0	0	1	0	0	1	1	54	155	22.4766	1	1	91	3	3	3	4	4	4	4	4	4	4	3	4	3	3	3	3	3	4	4	3	3	4	4	4	3
115	3	2	2495	70	1	4	2	1	5	2	0	0	0	1	0	0	1	1	35	145	16.6468	1	1	80	5	2	4	5	5	5	4	4	3	4	2	4	4	1	4	1	4	4	4	4	3	4	4	4	3
116	3	2	2491	74	2	2	2	1	25	2	0	0	0	1	0	0	1	1	60	145	28.5375	1	1	96	3	4	4	3	3	3	3	3	3	3	2	4	3	3	3	3	3	4	4	4	3	3	4	4	4
117	3	2	2490	75	1	2	1	1	18	2	0	0	0	1	0	0	1	1	50	150	22.2222	1	1	82	3	2	4	3	3	3	3	3	3	4	3	3	3	3	4	4	4	3	3	4	4	4	4	4	4
118	3	2	2495	70	1	2	2	1	10	2	0	0	0	1	0	1	1	1	50	150	22.2222	1	2	93	3	3	4	3	4	4	4	4	3	4	3	3	3	4	4	4	3	4	5	5	4	4	4	4	2
119	3	2	2493	72	2	4	2	1	12	2	0	0	0	1	0	0	1	1	78	152	33.7604	1	5	105	3	2	3	4	3	4	5	4	2	3	2	4	4	4	4	4	3	4	4	4	4	4	4	4	3
120	3	2	2490	75	1	4	2	1	1	2	0	0	0	1	0	0	1	1	52	156	21.3675	1	1	93	3	4	2	4	4	3	4	4	3	4	4	3	3	3	4	4	4	4	4	4	4	3	4	4	3
122	3	2	2493	72	1	4	2	4	18	2	1	0	0	1	0	0	1	1	47	149	21.1702	1	1	96	4	2	3	4	4	4	3	4	2	4	2	3	3	3	3	4	3	3	3	4	3	5	3	3	1
123	3	2	2493	72	1	2	2	1	11	2	0	0	0	1	0	0	1	1	50	150	22.2222	1	1	94	3	2	3	3	4	4	4	4	2	3	3	4	4	3	4	5	4	4	4	4	4	4	3	3	2
124	3	2	2494	71	1	4	2	1	1	2	0	0	0	1	0	0	1	1	59	154	24.8777	1	1	91	4	3	2	5	5	4	4	5	3	4	3	4	3	3	3	3	4	3	4	2	3	3	4	3	1
125	3	2	2495	70	1	1	2	6	4	2	0	0	0	1	0	0	1	1	53	150	23.5556	1	1	80	3	2	4	5	4	4	4	4	2	3	2	3	2	2	3	3	2	4	3	3	3	2	2	4	1
126	3	2	2491	74	1	4	2	1	10	2	0	0	0	1	0	0	1	2	65	157	26.3702	1	1	101	4	3	2	5	4	4	4	4	3	4	3	2	3	3	2	4	4	3	4	1	4	3	1	3	1
127	3	2	2494	71	1	4	2	7	3	2	0	0	0	1	0	0	1	1	62	160	24.2187	1	1	101	3	3	2	3	4	4	4	4	4	3	3	1	3	4	4	1	1	1	4	3	3	3	2	4	1
215	3	2	2511	54	1	2	4	1	2	2	0	0	0	1	0	0	1	1	50	150	22.2222	1	1	70	3	4	4	4	4	4	4	4	5	4	3	4	4	4	4	4	3	4	4	3	4	4	4	4	4
216	3	2	2507	58	1	2	2	1	5	2	0	0	0	1	0	0	2	1	59	149	26.5754	1	1	89	4	4	4	4	4	4	4	4	4	4	3	4	4	4	4	5	4	4	4	3	4	3	3	4	4
217	3	2	2506	59	1	2	2	1	25	2	1	1	0	1	0	0	2	2	64	155	26.6389	1	3	97	3	4	4	3	5	3	4	3	5	4	4	3	3	4	4	3	3	3	3	4	3	4	4	4	1
218	3	2	2509	56	1	1	2	1	5	2	0	0	0	1	0	0	1	1	64	150	28.4444	1	1	91	3	3	3	3	4	2	3	4	4	2	2	4	4	3	3	4	3	4	3	2	3	3	4	4	2
219	3	2	2509	56	1	2	3	1	10	2	0	0	0	1	0	0	1	1	67	150	29.7778	1	1	91	3	3	4	3	4	4	4	4	4	4	2	3	4	4	4	4	3	4	5	4	3	3	4	3	4
220	3	2	2512	53	1	2	4	1	2	2	0	0	0	1	0	0	1	1	75	160	29.2969	1	1	93	3	3	4	2	4	4	4	4	4	4	2	3	4	4	4	5	3	4	4	3	4	4	4	4	3
221	3	2	2515	50	1	2	2	1	2	2	0	0	0	1	0	0	1	1	62	148	28.3053	1	1	100	3	4	4	4	3	3	4	4	4	4	2	4	4	4	5	5	4	4	4	3	4	4	4	4	4
222	3	2	2505	60	1	2	2	1	13	2	0	0	0	1	0	0	1	1	62	148	28.3053	1	5	85	3	3	4	3	3	4	4	4	3	3	3	4	4	4	5	4	4	4	4	4	4	4	4	4	3
223	3	2	2528	37	1	2	6	4	2	2	0	0	0	1	0	0	1	1	62	148	28.3053	1	5	113	3	4	4	4	3	4	4	4	4	4	3	4	4	4	3	4	3	4	4	3	3	3	4	4	4
224	3	2	2504	61	1	2	2	1	5	2	0	0	0	1	0	0	1	1	85	165	31.2213	1	3	107	4	2	4	5	5	5	5	5	5	5	2	5	5	5	5	5	4	5	5	5	5	5	5	5	5
225	3	2	2506	59	1	2	2	1	6	2	0	0	0	1	0	1	2	1	73	149	32.8814	1	1	102	3	4	4	4	4	4	4	4	5	4	4	4	4	4	3	3	2	4	4	4	4	4	4	4	4
226	3	2	2519	46	2	2	6	3	1	2	0	0	0	1	0	0	1	1	43	150	19.1111	1	1	96	1	4	3	5	4	4	4	4	4	4	5	4	4	4	4	4	4	5	4	4	4	4	4	4	4
227	3	2	2500	65	2	4	3	3	13	2	0	0	0	1	0	0	1	1	44	150	19.5556	1	1	87	4	4	4	4	4	4	4	4	5	3	4	3	3	2	4	4	4	4	4	4	4	4	5	5	3
228	3	2	2518	47	2	2	2	2	15	2	0	0	0	1	0	0	1	1	64	156	26.2985	1	1	88	3	4	4	4	4	4	4	4	5	3	4	3	3	3	3	3	4	4	4	4	4	4	4	4	3
229	3	2	2509	56	2	2	4	2	5	2	0	0	0	1	0	0	2	1	84	170	29.0657	5	5	84	2	4	3	3	3	3	3	3	5	3	2	3	3	2	3	3	3	4	4	4	3	4	4	4	3
230	3	1	2512	53	2	2	2	1	5	2	0	0	0	1	0	0	1	1	62	171	21.2031	1	1	76	4	3	4	4	4	4	4	4	3	4	3	4	4	4	4	4	4	4	4	4	4	3	3	4	3
231	3	2	2507	58	2	2	2	7	10	2	0	0	0	1	0	0	1	1	59	145	28.0618	1	1	70	3	4	4	4	4	4	4	4	5	4	3	4	4	4	3	3	3	4	4	4	4	4	4	4	3
232	3	1	2498	67	2	2	3	1	4	2	0	0	0	1	0	0	1	1	61	162	23.2434	1	5	82	5	3	4	5	5	5	5	5	2	5	2	5	4	1	5	5	5	5	5	4	5	5	5	5	2
233	3	2	2506	59	2	2	3	6	20	2	0	0	0	1	0	0	2	1	52	157	21.0962	3	3	73	4	4	5	5	5	5	5	5	5	4	2	5	5	4	5	5	4	4	5	4	5	5	5	5	3
234	3	2	2507	58	2	1	2	3	7	2	0	0	0	1	0	0	1	1	76	156	31.2295	1	2	84	4	3	4	2	4	4	5	5	3	5	3	5	5	5	3	5	3	4	5	4	5	4	5	5	2
235	3	1	2492	73	2	2	2	1	4	2	0	0	0	1	0	0	1	1	67	167	24.0238	1	1	98	3	3	3	4	4	4	4	4	3	4	3	4	4	4	4	4	4	4	5	4	4	4	4	4	4
236	3	2	2501	64	2	2	2	2	6	2	0	0	0	1	0	0	1	1	64	155	26.6389	1	1	84	2	4	3	3	5	3	3	3	3	4	3	3	3	3	4	4	2	4	2	4	4	4	4	4	3
237	3	2	2503	62	2	2	2	1	7	2	1	0	0	1	0	0	1	1	58	150	25.7778	1	1	76	3	3	3	2	4	4	4	4	2	4	2	3	3	3	3	3	3	4	4	4	4	4	4	4	3
238	3	1	2509	56	2	1	2	2	10	2	0	0	0	1	0	0	1	1	67	160	26.1719	5	5	101	3	4	3	3	3	3	3	3	2	2	2	3	3	3	3	3	3	3	3	2	3	4	4	4	3
239	3	1	2504	61	2	2	2	3	10	2	0	0	0	1	0	1	1	1	65	167	23.3067	1	2	80	5	5	5	4	4	4	4	4	2	4	2	5	4	4	4	4	4	5	5	3	4	5	5	4	4
240	3	2	2508	57	1	2	2	1	20	2	0	0	0	1	0	0	1	1	50	163	18.8189	5	1	73	3	2	3	1	3	3	3	4	5	4	2	3	4	4	4	3	4	4	4	4	4	4	3	4	3
241	3	2	2507	58	2	1	2	2	8	2	0	0	0	1	0	0	1	1	64	160	25	1	1	76	4	3	5	3	4	5	4	4	4	5	2	5	5	5	5	5	4	5	5	4	5	5	5	5	2
242	3	2	2510	55	2	2	2	2	2	2	0	0	0	1	0	0	1	1	58	156	23.833	1	1	76	4	5	5	5	5	5	5	5	5	5	3	5	5	5	5	5	2	5	5	4	5	5	1	5	3
378	3	2	2493	72	1	2	2	3	10	2	0	0	0	1	0	1	1	1	60	150	26.6667	1	1	90	4	4	4	4	4	4	4	4	3	4	2	3	3	3	4	4	4	4	4	4	3	3	4	4	2
379	3	2	2502	63	1	2	2	1	20	2	0	0	0	1	0	0	1	1	52	155	21.6441	1	1	92	4	3	3	4	4	4	4	4	3	3	3	3	4	4	4	4	3	3	3	4	4	4	4	4	3
380	3	2	2511	54	1	2	2	1	7	2	0	0	0	1	0	0	1	1	62	150	27.5556	1	1	102	3	2	3	2	4	4	4	4	5	4	5	3	3	3	3	3	3	3	4	3	4	4	4	4	4
381	3	1	2508	57	1	2	2	1	5	2	0	0	0	1	0	0	1	1	66	164	24.539	5	5	92	2	4	1	5	5	5	5	5	3	3	5	3	5	4	5	5	5	5	5	2	5	5	5	5	5
382	3	1	2504	61	1	2	3	1	2	2	0	0	0	1	0	0	1	1	56	165	20.5693	5	5	86	4	5	5	5	5	5	5	5	3	5	1	5	5	5	5	5	5	5	4	4	5	5	1	5	5
383	3	2	2514	51	1	2	2	1	4	2	0	0	0	1	0	0	1	1	57	160	22.2656	1	1	98	5	3	5	3	4	5	5	5	3	5	3	5	5	3	5	5	3	5	5	3	3	5	5	5	5
384	3	2	2512	53	1	2	4	1	3	2	0	0	0	1	0	0	1	1	50	150	22.2222	1	1	73	3	4	3	2	3	3	5	4	3	5	3	2	4	4	4	4	3	4	4	4	4	4	4	4	4
385	3	2	2509	56	1	3	2	1	3	2	0	0	0	1	0	0	1	1	63	155	26.2227	1	2	88	4	3	3	3	3	3	3	4	3	3	4	3	3	3	3	3	2	4	3	3	3	3	3	3	3
386	3	2	2525	40	1	2	3	1	7	2	0	0	0	1	0	0	1	1	58	160	22.6562	1	1	89	3	3	3	4	3	3	4	5	4	4	4	4	4	4	4	5	3	4	2	3	3	4	4	4	5
387	3	2	2517	48	1	2	4	1	11	2	0	0	0	1	0	0	1	1	60	153	25.6312	1	5	93	3	4	5	3	5	5	5	5	5	5	5	5	5	4	5	5	4	5	5	5	5	5	1	5	5
388	3	2	2518	47	1	2	2	1	4	2	0	0	0	1	0	0	1	1	46	147	21.2874	1	1	73	4	3	4	3	4	4	4	4	3	4	2	4	4	3	3	4	3	4	2	3	4	4	4	4	3
389	3	2	2513	52	1	2	2	1	23	2	0	0	0	1	0	0	1	1	69	156	28.3531	1	1	99	3	5	3	4	3	3	3	4	2	4	3	3	4	4	4	4	3	4	3	3	3	4	3	4	4
390	3	2	2516	49	1	2	2	1	1	2	0	0	0	1	0	0	1	1	70	165	25.7117	1	1	85	3	4	3	4	4	4	4	3	4	3	4	3	3	4	4	3	3	4	4	4	3	4	4	4	3
391	3	1	2504	61	1	2	4	1	7	2	0	0	0	1	0	0	1	1	67	160	26.1719	1	1	90	3	4	3	4	3	3	3	4	5	4	4	3	4	4	3	3	2	4	3	3	3	3	4	4	3
392	3	2	2518	47	1	2	4	1	1	2	0	0	0	1	0	0	1	1	58	155	24.1415	1	1	76	4	4	3	4	4	3	4	4	5	4	2	4	3	3	4	4	3	4	3	3	5	3	5	4	2
393	3	2	2514	51	1	2	2	1	3	2	0	0	0	1	0	0	1	1	70	150	31.1111	1	5	103	4	3	3	3	3	3	3	3	2	3	3	3	3	3	3	3	3	3	3	3	3	3	4	4	3
394	3	1	2510	55	1	2	2	1	3	2	0	0	0	1	0	0	1	1	92	165	33.7925	5	2	117	3	3	4	1	5	4	4	4	2	4	2	4	4	4	4	4	3	4	4	4	4	4	5	4	3
395	3	1	2503	62	1	2	2	1	3	2	0	0	0	1	0	0	1	1	61	172	20.6193	1	3	83	4	3	4	4	4	4	4	4	3	4	2	4	4	4	4	4	3	4	3	4	4	4	4	4	3
396	3	1	2513	52	1	2	4	1	3	2	0	0	0	1	0	0	1	1	64	162	24.3865	1	5	86	4	2	4	4	4	4	4	4	3	4	3	4	4	4	4	4	4	3	4	3	3	4	4	4	3
397	3	1	2512	53	1	2	2	1	10	2	0	0	0	1	0	0	1	1	74	170	25.6055	2	5	92	3	2	4	5	4	4	4	4	4	4	2	2	4	4	4	4	4	4	4	4	4	4	4	5	4
398	3	1	2507	58	1	2	2	1	4	2	0	0	0	1	0	0	1	1	73	162	27.8159	3	5	92	4	2	4	5	4	4	4	4	3	4	2	4	4	4	3	4	4	4	4	4	4	4	5	5	4
399	3	2	2504	61	1	1	2	1	3	2	0	0	0	1	0	0	1	1	36	140	18.3673	1	1	62	2	2	4	4	4	4	5	5	4	4	2	4	4	4	4	4	4	4	5	5	5	5	5	5	3
400	3	2	2514	51	1	2	2	1	2	2	0	0	0	1	0	0	1	1	58	150	25.7778	1	5	90	3	5	3	3	3	4	4	4	5	4	3	4	4	4	3	3	3	4	4	4	4	4	4	4	3
401	3	2	2511	54	1	2	4	2	4	2	0	0	0	1	0	0	1	1	60	144	28.9352	1	1	93	3	2	4	5	4	4	4	3	3	1	4	5	4	4	4	5	3	3	3	2	5	4	3	4	1
402	3	2	2517	48	1	2	2	1	3	2	0	0	0	1	0	0	1	1	50	150	22.2222	1	1	85	3	3	3	3	4	4	4	4	5	3	3	2	3	3	3	2	3	3	1	3	3	3	3	3	2
403	3	2	2522	43	1	2	4	1	1	2	0	0	0	1	0	0	1	1	74	150	32.8889	1	1	101	4	3	4	5	4	4	4	4	4	4	4	3	3	4	4	4	4	4	4	4	4	3	3	4	3
404	3	2	2505	60	1	4	2	3	1	2	0	0	0	1	0	0	1	1	53	160	20.7031	1	3	98	3	3	3	5	3	4	4	4	3	4	2	3	3	3	4	4	4	3	1	3	3	3	4	3	3
405	3	2	2515	50	1	2	2	1	2	2	0	0	0	1	0	0	2	1	63	165	23.1405	1	1	92	3	4	3	4	4	4	4	3	4	4	2	4	4	4	4	4	4	4	3	4	4	4	4	4	5
406	3	2	2512	53	1	2	2	1	10	2	0	0	0	1	0	0	1	1	58	153	24.7768	1	1	87	3	3	3	3	5	4	4	4	3	4	2	4	4	5	4	4	4	5	5	4	4	5	4	4	4
407	3	2	2526	39	1	2	2	1	2	2	0	0	0	1	0	0	1	1	50	157	20.2848	1	1	74	5	4	2	5	5	5	5	5	5	5	2	5	5	5	5	5	3	5	3	5	5	5	5	5	5
408	3	2	2515	50	1	2	2	1	14	2	0	0	0	1	0	0	1	1	45	150	20	1	1	78	3	3	3	3	3	4	4	4	5	3	4	3	3	3	4	4	3	4	4	3	4	4	4	4	4
409	3	1	2515	50	1	2	4	1	2	2	0	0	0	1	0	0	1	1	80	169	28.0102	5	5	101	3	2	3	3	3	3	3	3	2	3	4	4	4	3	4	4	3	4	4	4	4	4	4	4	5
410	3	2	2515	50	1	2	2	1	2	2	0	0	0	1	0	0	1	1	57	157	23.1247	1	1	86	3	3	2	4	3	3	4	4	4	3	4	3	3	3	3	3	3	4	3	3	3	3	3	3	3
411	3	1	2516	49	1	2	4	1	2	2	0	0	0	1	0	0	1	1	72	158	28.8415	1	1	92	3	4	3	4	4	4	4	4	4	3	2	3	4	4	4	4	4	4	4	3	4	4	4	4	4
412	3	2	2517	48	1	2	3	3	7	2	0	0	0	1	0	0	1	1	62	156	25.4767	1	1	96	3	3	3	4	3	3	4	5	4	4	3	3	4	4	4	4	3	5	4	4	4	4	4	4	4
413	3	2	2502	63	1	2	2	1	20	2	0	0	0	1	0	0	1	1	54	155	22.4766	1	1	88	4	2	4	4	4	4	4	4	4	4	4	4	4	4	4	4	3	4	4	4	4	4	4	4	4
414	3	1	2518	47	1	2	2	2	10	2	0	0	0	1	0	0	1	1	62	161	23.9188	5	2	87	4	3	4	4	4	4	4	4	5	4	4	4	4	4	4	4	4	4	4	4	4	4	4	4	4
415	3	2	2511	54	1	2	2	7	10	2	0	0	0	1	0	0	1	1	57	152	24.6711	1	1	86	4	5	4	3	4	4	4	4	5	4	2	4	4	4	4	4	4	4	4	4	4	4	4	4	4
416	3	2	2492	73	1	2	2	1	20	2	0	0	0	1	0	0	1	1	60	150	26.6667	1	1	92	3	3	3	3	3	4	4	4	3	3	3	4	4	4	4	4	3	4	4	3	4	3	4	3	3
417	3	2	2523	42	1	2	2	1	3	2	0	0	0	1	0	0	1	1	63	150	28	1	1	93	4	3	4	4	4	4	4	4	4	4	3	4	4	4	4	4	3	5	4	4	4	4	4	4	4
418	3	2	2537	28	1	2	2	1	8	2	0	0	0	1	0	0	1	1	44	145	20.9275	1	1	75	4	4	4	2	3	4	4	4	4	3	3	3	4	4	4	4	4	5	4	4	4	4	4	4	4
419	3	2	2512	53	1	2	2	1	2	2	0	0	0	1	0	0	1	1	68	155	28.3039	1	1	96	3	5	3	4	4	4	4	4	5	4	2	4	4	4	4	4	4	5	4	4	4	4	4	4	4
420	3	2	2503	62	1	2	2	1	7	2	0	0	0	1	0	0	1	1	54	140	27.551	1	1	72	4	2	4	4	4	4	4	3	5	3	3	3	3	4	4	4	4	4	4	4	4	4	4	4	3
421	3	1	2508	57	1	2	2	1	5	2	0	0	0	1	0	0	1	1	59	168	20.9042	1	1	79	3	5	4	4	4	4	4	3	5	3	4	3	3	3	4	3	3	3	3	3	3	4	4	4	3
422	3	2	2496	69	1	2	2	2	1	2	0	0	0	1	0	0	1	1	53	160	20.7031	1	1	86	4	5	4	4	4	4	3	4	4	4	4	3	3	3	3	4	4	4	4	4	4	4	4	4	3
423	3	2	2499	66	1	3	2	1	16	2	0	0	0	1	0	0	1	1	63	140	32.1429	1	1	108	3	1	3	3	3	3	4	4	4	4	1	3	3	3	3	3	4	4	3	3	3	4	4	4	3
424	3	1	2510	55	1	2	4	1	5	2	0	0	0	1	0	0	1	1	58	170	20.0692	1	1	78	3	5	3	4	4	3	3	3	4	3	2	3	3	3	2	3	3	3	3	4	3	3	3	5	3
425	3	2	2499	66	1	2	2	1	1	2	0	0	0	1	0	0	1	1	56	150	24.8889	1	1	76	3	4	3	4	3	3	3	3	3	3	4	3	3	4	4	4	3	4	4	4	4	4	3	4	3
426	3	2	2493	72	1	4	2	1	1	2	0	0	0	1	0	0	1	1	60	156	24.6548	1	1	78	2	2	3	4	4	4	4	3	2	3	2	3	3	4	4	4	3	4	4	4	4	2	3	3	3
427	3	2	2502	63	1	2	2	1	4	2	0	0	0	1	0	0	1	1	61	172	20.6193	5	1	87	3	3	3	3	3	3	3	2	4	3	3	2	4	4	3	4	4	4	4	4	4	4	4	4	3
428	3	2	2511	54	1	2	3	1	3	2	0	0	0	1	0	1	1	1	68	156	27.9421	1	1	89	2	4	4	4	3	3	2	2	4	3	4	2	3	3	3	4	3	3	3	3	3	4	4	4	3
429	3	2	2495	70	1	4	4	1	15	2	0	0	0	1	0	0	1	1	55	150	24.4444	1	1	89	3	2	3	4	3	3	3	3	3	3	4	3	3	3	4	3	3	4	3	3	3	3	3	5	3
430	3	1	2497	68	1	2	2	1	3	2	0	0	0	1	0	0	1	2	72	163	27.0993	1	1	99	3	5	3	4	3	3	4	4	5	4	3	3	4	4	4	3	3	4	4	4	4	4	4	4	3
431	3	1	2504	61	1	2	4	1	6	2	0	0	0	1	0	0	1	1	92	175	30.0408	1	1	105	4	4	4	4	4	4	4	4	5	4	4	4	4	4	4	4	4	5	4	4	4	4	4	4	4
432	3	1	2508	57	1	2	2	1	7	2	0	0	0	1	0	0	1	1	60	163	22.5827	1	1	88	3	3	4	4	3	3	3	3	4	4	3	4	4	4	4	4	3	5	4	3	4	4	4	4	3
557	3	1	2504	61	1	2	2	1	15	2	0	0	0	1	0	0	1	1	61	158	24.4352	5	1	88	3	4	3	4	3	3	3	4	5	3	3	3	3	3	3	4	3	4	3	3	4	3	3	3	3
558	3	2	2508	57	1	2	2	1	13	2	0	0	0	1	0	0	1	1	49	150	21.7778	1	1	71	2	3	3	4	4	4	4	4	5	3	4	3	3	3	4	3	3	4	4	3	3	3	3	3	3
559	3	1	2501	64	1	2	2	1	11	2	0	0	0	1	0	0	1	1	60	160	23.4375	1	5	90	3	1	5	4	5	5	4	4	4	5	4	5	5	5	5	4	3	5	5	2	5	5	5	5	5
560	3	2	2506	59	1	2	2	1	10	2	0	0	0	1	0	0	1	1	58	167	20.7967	1	1	79	3	4	3	4	3	4	4	5	4	3	5	3	5	3	3	4	5	4	5	5	5	5	5	5	3
561	3	2	2506	59	1	2	2	1	10	2	0	0	0	1	0	0	1	1	49	150	21.7778	1	1	83	4	3	4	4	5	4	4	4	5	4	4	4	4	4	4	4	4	4	4	3	5	4	5	4	3
562	3	2	2510	55	1	2	2	1	4	2	0	0	0	1	0	0	1	1	58	150	25.7778	1	1	86	2	4	3	3	4	4	5	5	5	4	5	4	4	4	4	4	4	4	4	2	5	4	4	4	4
563	3	2	2495	70	1	2	2	1	5	2	0	0	0	1	0	0	1	1	52	150	23.1111	1	1	90	3	3	3	4	4	4	4	4	5	4	4	4	4	3	4	4	4	4	4	4	3	4	4	4	3
564	3	2	2514	51	1	2	2	7	16	2	0	0	0	1	0	0	1	1	64	162	24.3865	1	1	94	3	4	3	3	3	3	3	3	4	4	2	3	3	3	4	3	3	4	4	4	4	4	3	4	4
565	3	2	2494	72	1	4	2	1	20	2	0	0	0	1	0	0	1	1	44	150	19.5556	1	1	82	3	2	2	2	3	1	5	5	5	5	3	4	5	5	5	5	5	5	1	5	5	5	2	5	3
566	3	2	2496	69	1	4	2	1	1	2	0	0	0	1	0	0	1	1	49	155	20.3954	1	1	98	3	3	4	4	4	4	4	5	5	4	5	4	4	4	4	4	3	4	4	4	4	4	5	5	3
567	3	2	2503	62	1	4	2	1	10	2	0	0	0	1	0	0	1	1	50	165	18.3655	1	1	77	4	3	3	4	4	4	4	4	3	3	5	4	4	4	3	3	3	3	4	4	4	3	3	3	3
568	3	1	2513	52	1	2	2	1	2	2	0	0	0	1	0	0	1	1	78	170	26.9896	1	1	98	3	4	3	3	3	3	4	4	3	3	1	3	4	4	4	4	3	4	3	4	4	4	4	4	4
569	3	2	2498	67	1	2	6	4	20	2	0	0	0	1	0	0	2	1	45	152	19.4771	1	1	69	3	5	3	2	3	3	3	3	4	3	5	3	4	4	4	4	3	4	4	3	3	4	3	3	4
570	3	2	2498	67	1	4	2	1	1	2	0	0	0	1	0	0	1	1	45	150	20	1	1	83	4	3	3	4	4	3	4	3	3	3	4	4	3	4	4	3	3	3	4	4	3	4	4	4	4
571	3	2	2495	70	1	2	2	1	7	2	0	0	0	1	0	0	1	1	40	145	19.025	1	1	80	4	4	3	3	3	4	4	3	4	4	5	4	4	4	3	3	2	4	3	3	3	4	4	4	3
572	3	2	2498	67	1	2	6	4	13	2	0	0	0	1	0	0	1	1	70	140	35.7143	1	1	93	5	3	5	4	5	5	5	5	1	5	1	5	5	5	5	5	5	4	5	4	5	5	5	5	2
573	3	2	2498	67	1	4	2	1	17	2	0	0	0	1	0	0	1	1	49	145	23.3056	1	1	86	3	2	3	3	3	3	3	3	1	3	4	3	4	3	5	4	3	5	4	4	5	5	5	5	3
574	3	1	2497	68	1	2	6	4	11	2	0	0	0	1	0	0	1	1	64	163	24.0882	1	1	87	3	4	4	2	4	4	4	4	5	4	5	4	3	2	4	4	3	4	4	3	4	4	4	4	4
575	3	2	2498	67	1	2	2	1	10	2	0	0	0	1	0	0	1	1	53	147	24.5268	1	5	86	4	3	4	3	5	4	5	5	4	4	4	4	4	4	5	5	3	4	4	5	5	4	4	4	2
576	3	2	2499	66	1	2	2	1	24	2	0	0	0	1	0	0	1	1	63	150	28	1	1	97	3	3	3	3	3	3	4	4	2	3	2	3	3	3	3	3	3	2	2	3	3	2	2	2	3
577	3	2	2496	69	1	2	6	6	7	2	0	0	0	1	0	0	2	1	67	157	27.1816	1	1	89	4	5	3	5	4	4	4	4	5	5	4	4	4	4	5	5	4	3	4	4	5	4	4	4	4
578	3	2	2490	75	1	4	2	7	1	2	0	0	0	1	0	0	1	1	40	150	17.7778	1	1	70	3	3	2	3	4	3	5	3	4	4	1	2	3	3	4	4	3	4	2	3	3	2	2	2	2
579	3	2	2498	67	1	1	2	1	10	2	0	0	0	1	0	1	1	1	52	152	22.5069	1	1	76	3	3	5	4	5	5	5	4	3	5	3	5	4	4	4	5	3	5	2	4	5	5	4	5	3
580	3	2	2500	65	1	4	2	6	17	2	0	0	0	1	0	0	1	1	59	159	23.3377	1	1	90	3	3	4	5	3	5	5	5	3	5	3	5	5	5	5	5	4	5	5	4	3	5	5	5	3
581	3	2	2499	66	1	2	2	1	4	2	0	0	0	1	0	0	1	1	45	145	21.4031	1	5	80	3	5	5	5	5	5	5	5	5	5	4	5	5	5	5	5	3	5	5	5	5	5	5	5	4
582	3	2	2510	55	1	2	2	1	3	2	0	0	0	1	0	0	1	1	52	150	23.1111	1	5	95	4	3	4	5	5	4	5	5	3	5	2	5	5	5	5	5	3	5	5	5	5	5	5	5	2
583	3	2	2516	49	1	2	4	1	3	2	0	0	0	1	0	0	2	1	82	163	30.863	1	1	90	4	5	4	4	4	4	4	4	2	4	4	4	4	4	4	4	4	4	4	4	4	4	4	4	3
584	3	2	2536	29	1	1	4	1	1	2	0	0	0	1	0	0	1	1	55	150	24.4444	1	1	81	4	4	4	4	4	4	4	4	5	4	3	4	4	4	4	4	4	4	4	4	4	4	4	4	3
585	3	2	2517	48	1	2	4	2	2	2	0	0	0	1	0	0	1	1	95	155	39.5421	1	1	114	3	3	4	4	3	4	3	3	4	4	2	4	4	4	4	4	3	4	3	4	4	4	4	4	4
586	3	2	2508	57	1	2	2	1	5	2	0	0	0	1	0	0	1	1	77	155	32.0499	1	1	104	3	2	3	3	3	3	3	3	5	3	4	3	3	3	3	4	3	4	3	3	4	3	3	3	3
587	3	2	2506	59	1	2	2	1	3	2	0	0	0	1	0	1	1	1	70	155	29.1363	1	1	97	3	3	3	4	4	4	5	4	4	4	3	4	3	4	4	4	4	5	3	4	4	2	4	2	4
588	3	2	2517	48	1	2	2	1	3	2	0	0	0	1	0	0	1	1	62	162	23.6244	1	1	69	3	3	3	4	3	4	4	3	3	4	3	3	4	4	4	3	2	3	1	3	3	4	3	4	4
589	3	2	2507	58	1	2	2	1	3	2	0	0	0	1	0	0	1	1	65	155	27.0552	1	1	88	4	2	3	4	4	4	4	4	5	4	3	4	3	3	4	4	3	4	4	4	4	4	4	4	4
590	3	2	2522	43	1	5	2	1	3	2	0	0	0	1	0	0	2	1	55	150	24.4444	1	1	94	3	4	4	3	2	4	3	3	3	3	4	3	1	1	3	3	2	4	1	4	4	3	4	3	4
591	3	2	2509	56	1	2	2	1	3	2	0	0	0	1	0	0	1	1	54	155	22.4766	1	1	88	3	5	3	4	4	4	3	3	5	4	2	4	3	3	4	3	4	4	4	4	4	4	3	4	3
592	3	2	2508	57	1	2	2	1	17	2	1	0	0	1	0	0	1	1	69	162	26.2917	1	3	87	3	3	4	4	4	4	4	4	4	4	2	4	4	4	4	4	3	4	4	4	4	3	4	3	4
593	3	2	2505	60	1	2	2	1	3	2	0	0	0	1	0	1	1	1	60	150	26.6667	1	1	92	3	3	3	3	3	4	5	5	4	3	1	3	5	5	3	3	3	4	5	3	3	5	3	5	3
594	3	2	2507	58	1	2	2	1	15	2	0	1	0	1	0	1	1	1	62	156	25.4767	1	5	87	4	3	3	5	5	4	3	5	4	5	3	4	3	3	5	4	3	5	5	4	5	5	5	4	4
595	3	2	2508	57	1	2	2	1	3	2	0	0	0	1	0	0	1	1	59	150	26.2222	1	5	90	3	2	3	3	4	4	4	4	5	3	5	4	4	4	4	4	3	4	2	3	4	5	5	5	4
596	3	2	2509	56	1	2	2	1	19	2	0	0	0	1	0	1	1	1	64	155	26.6389	1	1	91	2	5	5	3	3	5	5	4	5	3	5	4	4	4	4	4	3	5	5	5	4	5	5	5	4
128	4	1	2490	75	1	2	2	6	#NULL!	1	#NULL!	#NULL!	#NULL!	#NULL!	#NULL!	#NULL!	1	1	56	164	20.8209	5	5	83	4	2	4	5	4	4	4	4	2	4	2	4	4	4	4	3	4	4	4	4	4	4	4	4	3
129	4	1	2499	66	1	4	2	1	#NULL!	1	#NULL!	#NULL!	#NULL!	#NULL!	#NULL!	#NULL!	1	1	50	165	18.3655	5	5	77	3	3	4	4	4	4	4	4	3	4	3	4	4	4	3	3	3	3	4	4	4	4	4	4	3
130	4	1	2490	75	1	2	4	1	#NULL!	1	#NULL!	#NULL!	#NULL!	#NULL!	#NULL!	#NULL!	1	1	70	175	22.8571	1	4	82	4	2	4	4	4	4	4	4	2	3	2	4	4	4	4	4	3	4	4	3	4	4	4	4	4
131	4	1	2518	47	1	2	2	1	#NULL!	1	#NULL!	#NULL!	#NULL!	#NULL!	#NULL!	#NULL!	1	1	69	159	27.2932	1	5	93	4	2	4	4	4	4	4	4	2	4	2	4	3	4	5	5	4	4	4	4	4	4	5	5	3
132	4	1	2497	68	1	2	2	1	#NULL!	1	#NULL!	#NULL!	#NULL!	#NULL!	#NULL!	#NULL!	1	1	48	160	18.75	1	1	68	5	2	1	5	5	5	5	5	2	1	2	1	3	3	3	4	4	3	2	2	3	2	3	3	1
133	4	1	2502	63	1	3	2	1	#NULL!	1	#NULL!	#NULL!	#NULL!	#NULL!	#NULL!	#NULL!	1	1	68	165	24.977	5	1	98	5	2	3	5	5	5	5	5	2	3	3	5	3	3	5	5	5	4	4	2	3	3	5	5	5
134	4	1	2493	72	1	2	4	1	#NULL!	1	#NULL!	#NULL!	#NULL!	#NULL!	#NULL!	#NULL!	1	1	75	172	25.3515	4	4	94	3	1	3	3	3	3	3	3	2	3	1	3	3	3	4	4	4	4	4	4	4	4	4	4	3
135	4	1	2498	67	1	5	2	1	#NULL!	1	#NULL!	#NULL!	#NULL!	#NULL!	#NULL!	#NULL!	1	1	75	172	25.3515	5	1	79	4	3	3	4	4	4	4	4	3	4	3	4	4	5	4	4	3	4	4	4	4	3	5	3	3
136	4	1	2500	65	1	2	2	1	#NULL!	1	#NULL!	#NULL!	#NULL!	#NULL!	#NULL!	#NULL!	2	1	50	160	19.5312	1	5	76	4	2	4	5	5	5	5	4	3	4	2	5	5	5	4	5	4	3	4	4	4	4	5	5	4
137	4	2	2515	50	1	2	3	1	#NULL!	1	#NULL!	#NULL!	#NULL!	#NULL!	#NULL!	#NULL!	1	1	78	158	31.245	1	1	97	4	2	4	4	4	4	4	4	3	4	3	4	4	4	4	4	3	4	4	4	3	4	4	4	4
138	4	2	2515	50	1	2	2	1	#NULL!	1	#NULL!	#NULL!	#NULL!	#NULL!	#NULL!	#NULL!	2	1	63	160	24.6094	1	1	82	5	2	5	5	5	4	5	5	2	5	2	5	4	4	4	4	4	5	4	4	4	5	5	5	3
139	4	2	2509	56	1	2	2	1	#NULL!	1	#NULL!	#NULL!	#NULL!	#NULL!	#NULL!	#NULL!	1	1	75	160	29.2969	1	1	110	5	2	4	5	3	4	4	5	2	4	3	4	4	4	4	4	4	4	4	4	4	4	4	5	4
140	4	2	2505	60	1	4	6	1	#NULL!	1	#NULL!	#NULL!	#NULL!	#NULL!	#NULL!	#NULL!	1	1	58	155	24.1415	1	1	84	3	2	5	4	4	5	5	5	2	5	2	4	5	5	5	5	3	3	4	5	5	4	4	5	5
141	4	2	2509	56	1	2	2	1	#NULL!	1	#NULL!	#NULL!	#NULL!	#NULL!	#NULL!	#NULL!	1	1	80	157	32.4557	1	1	95	3	2	5	3	5	5	5	5	2	1	2	5	5	5	5	5	5	5	4	5	5	5	5	5	5
142	4	2	2515	50	1	2	2	1	#NULL!	1	#NULL!	#NULL!	#NULL!	#NULL!	#NULL!	#NULL!	1	1	55	145	26.1593	1	1	90	3	3	1	3	3	5	5	5	3	4	3	5	5	5	4	5	5	4	4	4	5	5	4	5	4
143	4	2	2512	53	1	2	3	1	#NULL!	1	#NULL!	#NULL!	#NULL!	#NULL!	#NULL!	#NULL!	1	1	71	150	31.5556	1	1	69	3	3	3	4	3	4	3	3	2	3	3	2	4	4	3	4	2	2	3	3	3	3	4	3	2
144	4	2	2511	54	1	3	2	1	#NULL!	1	#NULL!	#NULL!	#NULL!	#NULL!	#NULL!	#NULL!	1	1	77	156	31.6404	1	1	103	4	2	3	3	3	4	4	2	2	3	3	3	3	3	4	3	3	3	5	3	5	5	5	5	5
145	4	2	2514	51	1	4	2	1	#NULL!	1	#NULL!	#NULL!	#NULL!	#NULL!	#NULL!	#NULL!	2	1	46	150	20.4444	1	1	76	3	3	4	3	4	3	4	5	3	4	3	4	4	4	4	4	3	4	4	2	4	4	5	4	2
146	4	2	2513	52	1	2	2	2	#NULL!	2	0	0	0	0	0	1	1	1	73	155	30.385	1	1	100	4	3	3	5	4	4	3	5	3	4	3	4	5	5	5	4	4	4	5	5	4	3	5	4	5
147	4	2	2515	50	1	2	3	1	#NULL!	1	#NULL!	#NULL!	#NULL!	#NULL!	#NULL!	#NULL!	1	1	70	153	29.903	1	5	110	4	2	4	4	4	4	4	3	2	4	2	3	4	4	4	4	3	3	3	4	4	4	4	4	4
148	4	2	2512	53	1	2	4	1	#NULL!	1	#NULL!	#NULL!	#NULL!	#NULL!	#NULL!	#NULL!	1	1	56	146	26.2713	1	4	87	5	3	5	3	5	5	5	5	3	5	2	5	4	4	4	5	4	5	3	4	4	4	5	5	4
149	4	2	2517	48	1	2	4	1	#NULL!	1	#NULL!	#NULL!	#NULL!	#NULL!	#NULL!	#NULL!	1	2	65	155	27.0552	1	1	90	1	3	5	5	5	5	5	5	2	1	2	4	5	4	5	5	3	5	5	5	5	5	5	5	4
150	4	1	2510	55	1	2	4	1	#NULL!	1	#NULL!	#NULL!	#NULL!	#NULL!	#NULL!	#NULL!	1	1	52	159	20.5688	1	5	78	4	2	4	3	4	4	4	4	3	4	3	4	4	4	4	4	4	4	4	3	4	4	4	4	4
151	4	2	2512	53	1	2	4	2	#NULL!	1	#NULL!	#NULL!	#NULL!	#NULL!	#NULL!	#NULL!	1	1	60	165	22.0386	1	5	85	5	2	5	5	5	5	5	5	3	5	3	5	5	5	5	5	2	4	5	5	3	5	5	5	5
152	4	2	2503	62	1	4	2	1	#NULL!	1	#NULL!	#NULL!	#NULL!	#NULL!	#NULL!	#NULL!	1	1	58	145	27.5862	1	1	97	5	2	5	5	5	5	5	5	3	5	2	5	5	5	5	5	5	5	5	5	5	5	5	5	5
153	4	2	2499	66	1	2	2	1	#NULL!	1	#NULL!	#NULL!	#NULL!	#NULL!	#NULL!	#NULL!	1	1	60	153	25.6312	1	1	98	3	3	4	4	4	3	3	3	2	4	3	3	3	3	3	3	3	3	3	3	3	3	4	4	4
154	4	2	2501	64	1	2	2	1	#NULL!	2	0	0	0	0	0	1	1	1	45	148	20.5442	1	1	87	4	2	4	4	3	3	3	3	3	4	3	4	4	4	4	4	4	4	3	3	4	4	4	4	4
155	4	2	2503	62	1	5	2	1	#NULL!	1	#NULL!	#NULL!	#NULL!	#NULL!	#NULL!	#NULL!	1	1	56	152	24.2382	1	1	92	3	4	3	4	4	4	4	4	4	3	4	3	3	4	4	4	3	4	3	4	3	4	3	3	3
156	4	2	2502	63	1	2	2	1	#NULL!	1	#NULL!	#NULL!	#NULL!	#NULL!	#NULL!	#NULL!	1	1	56	143	27.3852	1	1	97	3	3	3	3	3	3	3	3	4	2	4	4	4	4	4	4	4	3	4	3	4	4	4	4	4
157	4	2	2505	60	1	2	2	1	#NULL!	2	0	0	0	0	0	1	1	1	70	153	29.903	1	1	112	3	2	3	3	4	4	2	3	4	2	3	4	4	4	2	3	3	3	3	4	3	3	3	3	3
158	4	2	2503	62	1	1	2	1	#NULL!	2	0	0	0	0	0	1	1	1	45	147	20.8247	1	1	75	3	3	4	3	4	4	4	4	5	4	4	4	4	4	4	4	3	4	4	4	4	4	4	4	4
159	4	2	2503	62	1	4	2	1	#NULL!	2	0	0	0	0	0	1	1	1	43	160	16.7969	1	5	81	5	3	3	5	5	4	4	4	5	2	3	4	4	3	4	4	4	4	4	3	3	2	2	3	1
160	4	2	2500	65	1	2	2	1	#NULL!	2	0	0	0	0	0	1	1	1	70	150	31.1111	1	5	101	3	4	3	4	4	4	4	4	5	3	3	4	2	2	3	3	3	3	3	2	3	2	3	3	1
161	4	2	2505	60	1	2	2	1	#NULL!	1	#NULL!	#NULL!	#NULL!	#NULL!	#NULL!	#NULL!	1	1	54	150	24	1	1	92	4	4	4	4	4	4	4	4	4	4	3	4	3	4	4	4	2	4	2	4	4	4	4	4	4
162	4	2	2501	64	1	2	2	1	#NULL!	2	0	0	0	0	0	1	1	1	35	153	14.9515	1	1	63	5	3	2	5	5	4	5	5	5	4	2	5	4	4	4	4	4	4	4	3	4	3	3	3	1
163	4	2	2502	63	1	2	2	1	#NULL!	1	#NULL!	#NULL!	#NULL!	#NULL!	#NULL!	#NULL!	1	1	56	160	21.875	1	1	82	5	4	5	5	5	5	5	5	4	5	4	5	5	5	5	5	2	5	5	4	5	3	5	2	3
164	4	1	2501	64	1	2	4	7	#NULL!	1	#NULL!	#NULL!	#NULL!	#NULL!	#NULL!	#NULL!	1	1	90	156	36.9822	1	1	117	3	5	4	4	4	4	4	3	5	4	4	4	4	4	4	4	3	3	4	4	4	4	4	4	4
165	4	2	2502	63	1	2	2	1	#NULL!	1	#NULL!	#NULL!	#NULL!	#NULL!	#NULL!	#NULL!	1	1	41	148	18.718	1	1	72	4	4	3	4	4	4	4	4	4	4	3	4	4	4	4	4	4	4	3	4	4	4	4	4	3
166	4	2	2498	67	1	4	2	1	#NULL!	1	#NULL!	#NULL!	#NULL!	#NULL!	#NULL!	#NULL!	1	1	51	155	21.2279	1	1	83	4	5	4	4	4	4	4	4	5	1	4	4	4	4	4	4	3	4	4	4	4	4	4	4	2
167	4	2	2501	64	1	2	2	6	#NULL!	1	#NULL!	#NULL!	#NULL!	#NULL!	#NULL!	#NULL!	1	1	53	154	22.3478	1	1	80	3	3	4	4	4	4	4	4	3	4	3	4	4	4	4	4	4	4	4	4	4	4	4	5	4
168	4	1	2509	56	1	1	2	1	#NULL!	1	#NULL!	#NULL!	#NULL!	#NULL!	#NULL!	#NULL!	1	1	49	150	21.7778	1	1	75	3	3	3	2	3	3	4	5	5	2	2	4	3	3	4	3	3	4	5	3	4	3	4	5	5
169	4	1	2510	55	1	3	2	1	#NULL!	1	#NULL!	#NULL!	#NULL!	#NULL!	#NULL!	#NULL!	1	1	68	150	30.2222	1	1	99	2	1	3	4	2	3	3	5	5	4	1	4	3	3	4	5	3	5	3	4	4	3	5	4	1
170	4	1	2509	56	1	5	2	1	#NULL!	1	#NULL!	#NULL!	#NULL!	#NULL!	#NULL!	#NULL!	1	1	71	151	31.139	1	5	92	3	4	4	4	4	4	4	4	5	4	4	4	4	3	3	3	2	3	2	4	4	4	4	4	2
171	4	1	2501	64	1	2	2	1	#NULL!	1	#NULL!	#NULL!	#NULL!	#NULL!	#NULL!	#NULL!	1	2	56	160	21.875	5	4	79	4	4	4	4	4	4	4	4	5	4	4	4	4	4	4	5	5	5	4	4	4	5	4	5	4
172	4	1	2503	62	1	2	3	1	#NULL!	1	#NULL!	#NULL!	#NULL!	#NULL!	#NULL!	#NULL!	1	1	60	159	23.7332	1	1	85	3	2	4	3	4	4	4	4	2	4	4	4	4	4	4	4	4	4	4	3	4	4	4	5	4
173	4	1	2509	56	1	2	2	1	#NULL!	1	#NULL!	#NULL!	#NULL!	#NULL!	#NULL!	#NULL!	1	1	63	156	25.8876	1	1	91	5	3	3	5	5	4	3	3	3	5	2	3	3	3	5	5	5	4	3	3	3	3	5	5	3
174	4	2	2495	70	1	3	2	1	#NULL!	1	#NULL!	#NULL!	#NULL!	#NULL!	#NULL!	#NULL!	1	1	50	150	22.2222	1	1	90	4	3	4	5	5	5	5	5	5	1	2	4	4	4	4	4	4	4	5	4	4	4	4	5	3
175	4	2	2492	73	1	2	2	7	#NULL!	1	#NULL!	#NULL!	#NULL!	#NULL!	#NULL!	#NULL!	1	1	64	160	25	1	1	90	3	2	3	3	3	3	3	3	3	3	2	4	4	4	4	4	3	4	3	3	4	4	4	4	3
177	4	2	2492	73	1	2	2	3	#NULL!	2	0	0	0	0	0	1	1	1	53	150	23.5556	1	4	81	3	5	4	3	4	4	4	4	5	4	4	4	3	3	3	3	3	4	3	4	3	4	3	3	3
178	4	2	2493	72	1	2	2	1	#NULL!	1	#NULL!	#NULL!	#NULL!	#NULL!	#NULL!	#NULL!	1	1	50	153	21.3593	1	1	90	4	4	4	4	4	4	4	4	5	4	5	4	3	4	4	4	4	4	4	4	4	3	4	3	3
179	4	2	2492	73	1	4	1	3	#NULL!	1	#NULL!	#NULL!	#NULL!	#NULL!	#NULL!	#NULL!	1	1	39	154	16.4446	1	1	68	5	5	1	5	5	4	4	4	5	3	5	3	2	2	3	4	4	2	2	3	3	2	2	4	1
180	4	2	2500	65	1	4	2	1	#NULL!	2	0	0	0	0	0	1	1	1	60	150	26.6667	1	1	106	3	2	3	4	4	4	2	4	3	3	2	2	3	4	3	2	2	4	2	3	4	3	2	2	3
181	4	2	2494	71	1	2	2	6	#NULL!	1	#NULL!	#NULL!	#NULL!	#NULL!	#NULL!	#NULL!	1	1	46	181	14.0411	1	4	82	3	4	3	4	3	3	3	3	4	3	4	3	4	3	3	3	4	4	4	4	4	4	3	3	3
182	4	2	2495	70	1	2	2	6	#NULL!	1	#NULL!	#NULL!	#NULL!	#NULL!	#NULL!	#NULL!	1	1	30	135	16.4609	1	1	78	3	4	3	4	3	3	3	3	5	3	4	3	4	3	3	3	4	4	4	4	4	4	3	3	3
183	4	2	2493	72	1	2	2	7	#NULL!	1	#NULL!	#NULL!	#NULL!	#NULL!	#NULL!	#NULL!	2	2	51	150	22.6667	1	1	83	5	5	1	2	4	4	4	4	4	4	3	2	2	2	3	4	4	2	2	1	2	2	2	4	1
184	4	2	2494	71	1	4	2	1	#NULL!	1	#NULL!	#NULL!	#NULL!	#NULL!	#NULL!	#NULL!	1	1	54	152	23.3726	1	1	83	3	4	4	4	3	4	4	4	3	3	4	4	4	4	4	3	3	4	4	4	3	4	4	4	3
185	4	1	2490	75	1	4	2	1	#NULL!	1	#NULL!	#NULL!	#NULL!	#NULL!	#NULL!	#NULL!	1	1	53	165	19.4674	1	1	78	5	5	2	5	5	5	5	5	5	4	2	3	3	3	3	4	4	3	3	1	2	2	1	2	1
186	4	2	2495	70	1	2	2	7	#NULL!	2	0	0	0	0	0	1	1	1	65	150	28.8889	1	1	102	4	4	2	2	4	4	4	4	4	3	4	3	3	1	3	3	3	3	3	1	3	3	1	4	1
187	4	2	2491	74	1	2	2	1	#NULL!	1	#NULL!	#NULL!	#NULL!	#NULL!	#NULL!	#NULL!	1	1	60	159	23.7332	1	1	84	3	5	3	4	4	4	4	4	5	4	4	4	4	4	4	4	4	4	4	4	4	4	4	4	3
188	4	2	2491	74	1	4	2	6	#NULL!	1	#NULL!	#NULL!	#NULL!	#NULL!	#NULL!	#NULL!	1	1	45	155	18.7305	1	1	92	4	4	4	3	5	4	5	5	2	4	2	4	5	5	5	5	3	5	5	4	4	4	5	4	3
189	4	2	2492	73	1	2	2	7	#NULL!	1	#NULL!	#NULL!	#NULL!	#NULL!	#NULL!	#NULL!	1	1	57	154	24.0344	1	5	88	4	4	2	5	4	4	4	4	5	2	4	4	3	3	3	4	4	3	3	1	3	3	1	3	1
190	4	2	2494	71	1	4	2	2	#NULL!	1	#NULL!	#NULL!	#NULL!	#NULL!	#NULL!	#NULL!	1	1	54	145	25.6837	1	5	103	3	4	4	3	3	4	4	4	3	3	4	3	3	3	4	4	4	4	4	4	3	3	4	4	4
191	4	2	2508	57	2	2	2	7	#NULL!	1	#NULL!	#NULL!	#NULL!	#NULL!	#NULL!	#NULL!	1	2	71	160	27.7344	2	5	86	3	4	4	3	4	4	4	4	5	4	2	4	4	4	4	4	3	4	4	4	4	4	4	4	3
192	4	2	2521	44	1	2	4	1	#NULL!	1	#NULL!	#NULL!	#NULL!	#NULL!	#NULL!	#NULL!	1	1	85	160	33.2031	1	5	90	4	3	4	5	4	4	2	4	5	3	2	4	4	4	4	4	3	5	4	3	3	4	4	4	4
193	4	2	2510	55	1	4	4	1	#NULL!	2	0	0	0	0	0	1	1	1	58	156	23.833	1	1	85	4	4	5	5	4	4	5	5	5	5	4	5	5	5	5	5	5	5	5	5	5	5	5	5	3
194	4	2	2515	50	1	2	4	1	#NULL!	1	#NULL!	#NULL!	#NULL!	#NULL!	#NULL!	#NULL!	1	1	67	150	29.7778	1	1	64	4	4	3	4	4	5	4	4	5	4	4	5	4	3	4	4	3	4	3	3	4	4	4	4	4
195	4	2	2502	63	1	2	3	1	#NULL!	1	#NULL!	#NULL!	#NULL!	#NULL!	#NULL!	#NULL!	1	1	57	160	22.2656	1	1	92	4	3	4	4	4	3	4	4	4	3	3	4	4	2	3	3	3	3	3	3	4	3	4	5	2
196	4	2	2505	60	1	2	4	1	#NULL!	1	#NULL!	#NULL!	#NULL!	#NULL!	#NULL!	#NULL!	1	2	57	160	22.2656	1	1	86	3	3	3	4	4	4	4	4	5	3	2	4	4	4	4	4	4	4	4	3	4	4	5	5	4
197	4	2	2513	52	1	5	2	1	#NULL!	1	#NULL!	#NULL!	#NULL!	#NULL!	#NULL!	#NULL!	1	1	56	152	24.2382	1	5	87	3	3	4	4	4	4	5	5	5	4	2	3	4	3	4	4	3	2	4	4	4	4	4	4	4
198	4	2	2500	65	1	2	2	1	#NULL!	1	#NULL!	#NULL!	#NULL!	#NULL!	#NULL!	#NULL!	1	1	67	150	29.7778	1	1	100	4	5	4	5	5	3	4	4	5	4	1	4	5	5	4	5	3	4	4	5	4	4	5	4	4
199	4	2	2511	54	1	2	3	1	#NULL!	1	#NULL!	#NULL!	#NULL!	#NULL!	#NULL!	#NULL!	1	1	80	150	35.5556	1	1	100	4	3	4	4	4	4	3	4	5	4	3	4	4	3	4	4	3	4	3	4	4	4	4	5	3
200	4	2	2512	53	1	2	2	1	#NULL!	1	#NULL!	#NULL!	#NULL!	#NULL!	#NULL!	#NULL!	1	1	52	155	21.6441	1	4	86	4	5	4	5	4	4	4	4	3	4	5	4	4	4	4	4	3	5	4	4	4	5	5	5	3
201	4	2	2503	62	1	4	2	3	#NULL!	1	#NULL!	#NULL!	#NULL!	#NULL!	#NULL!	#NULL!	1	1	52	156	21.3675	1	4	87	4	2	5	5	4	4	4	4	3	4	3	5	5	4	4	4	3	4	4	5	4	5	5	5	3
202	4	2	2502	63	1	2	2	1	#NULL!	1	#NULL!	#NULL!	#NULL!	#NULL!	#NULL!	#NULL!	1	1	43	160	16.7969	1	1	62	4	5	5	3	4	4	4	4	4	4	3	5	5	5	4	4	3	5	3	4	5	5	5	5	3
203	4	2	2521	44	1	2	2	1	#NULL!	1	#NULL!	#NULL!	#NULL!	#NULL!	#NULL!	#NULL!	1	1	65	150	28.8889	1	1	80	3	5	4	3	4	3	4	4	5	4	4	4	4	4	4	5	3	4	2	3	4	3	4	3	3
204	4	1	2537	28	1	1	4	2	#NULL!	1	#NULL!	#NULL!	#NULL!	#NULL!	#NULL!	#NULL!	1	1	62	168	21.9671	1	5	82	3	5	4	4	4	4	4	4	3	4	3	4	4	4	5	4	4	4	4	4	4	4	4	4	4
205	4	1	2503	62	1	1	2	1	#NULL!	1	#NULL!	#NULL!	#NULL!	#NULL!	#NULL!	#NULL!	1	1	50	160	19.5312	1	1	60	3	3	3	4	3	4	4	4	2	4	3	4	4	4	4	4	4	4	4	4	4	3	4	4	4
206	4	1	2499	66	1	2	2	1	#NULL!	1	#NULL!	#NULL!	#NULL!	#NULL!	#NULL!	#NULL!	1	1	60	165	22.0386	1	1	91	3	5	4	3	4	4	4	4	5	4	4	4	4	4	4	4	3	4	3	4	4	4	4	4	3
207	4	1	2512	53	1	2	4	3	#NULL!	2	0	0	0	0	0	1	1	1	60	172	20.2812	4	5	71	5	4	5	5	5	5	4	4	5	4	4	4	5	4	4	5	4	3	4	4	4	5	5	5	5
208	4	2	2500	65	1	5	2	1	#NULL!	1	#NULL!	#NULL!	#NULL!	#NULL!	#NULL!	#NULL!	1	1	48	150	21.3333	1	1	74	3	3	4	3	4	4	4	4	4	4	4	4	4	4	4	4	4	3	4	4	4	4	4	4	5
209	4	1	2536	29	1	1	4	1	#NULL!	2	0	0	0	0	0	1	1	1	92	165	33.7925	4	4	100	2	5	4	3	3	4	3	3	5	2	4	3	4	4	3	4	3	4	4	4	4	3	4	4	3
210	4	2	2522	43	1	2	4	8	#NULL!	2	0	0	0	0	0	1	1	2	70	144	33.7577	1	5	101	4	1	4	2	2	4	4	4	5	4	2	4	4	4	4	3	3	4	4	4	4	4	4	4	4
211	4	2	2511	54	1	5	2	1	#NULL!	1	#NULL!	#NULL!	#NULL!	#NULL!	#NULL!	#NULL!	2	1	45	150	20	1	4	66	4	1	4	4	3	4	4	3	5	4	2	4	4	4	3	3	4	4	4	4	4	4	4	4	4
212	4	1	2494	71	1	2	2	2	#NULL!	1	#NULL!	#NULL!	#NULL!	#NULL!	#NULL!	#NULL!	1	1	51	160	19.9219	5	4	71	4	3	4	5	4	4	4	4	2	4	2	4	4	3	3	3	3	4	3	3	4	4	4	4	3
213	4	2	2519	46	1	3	6	7	#NULL!	1	#NULL!	#NULL!	#NULL!	#NULL!	#NULL!	#NULL!	1	1	64	150	28.4444	1	1	81	3	3	4	4	4	4	4	4	2	5	3	4	4	4	3	4	3	4	4	3	3	4	5	5	1
214	4	1	2519	46	1	2	6	6	#NULL!	1	#NULL!	#NULL!	#NULL!	#NULL!	#NULL!	#NULL!	1	1	50	160	19.5312	5	5	75	5	3	5	5	4	4	3	3	3	4	2	3	4	4	4	4	2	4	4	4	4	4	4	4	4
254	4	2	2518	47	1	2	5	4	#NULL!	1	#NULL!	#NULL!	#NULL!	#NULL!	#NULL!	#NULL!	1	1	45	160	17.5781	1	1	70	3	4	4	4	3	3	3	3	4	3	4	4	4	3	3	3	2	4	3	2	4	2	4	4	4
256	4	2	2505	60	1	2	2	1	#NULL!	1	#NULL!	#NULL!	#NULL!	#NULL!	#NULL!	#NULL!	1	1	73	165	26.8136	1	1	91	4	5	4	5	5	4	5	5	5	5	3	4	5	5	5	5	4	3	4	5	5	4	5	5	3
482	4	1	2518	47	1	2	4	2	#NULL!	1	#NULL!	#NULL!	#NULL!	#NULL!	#NULL!	#NULL!	1	1	58	162	22.1003	4	5	77	3	2	4	4	4	4	4	4	4	4	3	4	4	4	5	5	5	4	4	4	3	4	5	5	5
483	4	1	2505	60	1	2	2	1	#NULL!	1	#NULL!	#NULL!	#NULL!	#NULL!	#NULL!	#NULL!	1	1	55	168	19.487	5	5	75	4	4	4	2	4	4	5	4	3	4	3	5	3	5	5	4	3	4	4	4	5	5	5	5	2
484	4	1	2521	44	1	1	6	1	#NULL!	1	#NULL!	#NULL!	#NULL!	#NULL!	#NULL!	#NULL!	1	1	70	180	21.6049	1	5	84	5	2	5	5	5	5	5	5	4	5	4	5	5	5	5	5	5	5	5	5	5	5	5	5	5
485	4	2	2509	56	1	2	2	3	#NULL!	2	0	0	0	0	0	1	1	1	70	160	27.3437	1	1	92	3	5	3	4	4	4	4	4	5	4	3	4	4	4	4	4	3	3	2	3	4	4	4	4	4
486	4	2	2511	54	1	2	2	1	#NULL!	2	0	0	0	0	0	1	1	2	49	155	20.3954	1	1	81	2	5	4	3	2	4	4	4	3	4	2	4	4	3	3	4	3	4	4	3	3	4	4	4	4
487	4	1	2512	53	1	2	2	1	#NULL!	2	0	0	0	0	#NULL!	1	1	1	80	163	30.1103	1	1	98	3	3	3	4	4	3	4	4	4	4	3	2	3	3	3	3	3	3	4	3	4	4	4	4	4
488	4	2	2501	64	1	3	3	3	#NULL!	1	#NULL!	#NULL!	#NULL!	#NULL!	#NULL!	#NULL!	1	1	60	164	22.3081	1	1	86	3	2	4	3	3	4	3	4	4	4	3	3	4	3	4	4	3	4	4	3	4	5	4	4	1
489	4	1	2518	47	1	2	2	1	#NULL!	1	#NULL!	#NULL!	#NULL!	#NULL!	#NULL!	#NULL!	1	1	65	160	25.3906	4	5	88	4	5	4	4	5	5	5	4	5	4	5	4	4	4	4	4	3	4	4	4	2	4	5	4	5
490	4	2	2517	48	1	4	5	3	#NULL!	1	#NULL!	#NULL!	#NULL!	#NULL!	#NULL!	#NULL!	1	1	48	142	23.8048	1	1	70	3	5	2	2	2	3	4	4	5	4	4	2	4	4	4	3	3	4	4	4	3	4	4	4	4
491	4	2	2529	36	1	2	2	3	#NULL!	1	#NULL!	#NULL!	#NULL!	#NULL!	#NULL!	#NULL!	1	1	64	156	26.2985	1	1	97	3	3	4	4	4	4	3	3	5	3	2	3	3	3	4	4	3	4	4	3	3	4	4	2	3
492	4	2	2496	69	1	4	2	3	#NULL!	1	#NULL!	#NULL!	#NULL!	#NULL!	#NULL!	#NULL!	1	1	36	150	16	1	1	60	3	3	4	5	3	3	3	4	4	4	3	4	5	5	5	5	3	5	4	5	4	5	5	5	3
493	4	2	2503	62	1	2	2	1	#NULL!	2	0	0	0	0	0	1	1	1	51	155	21.2279	1	4	77	3	3	5	3	4	5	5	5	2	5	2	5	5	5	5	5	3	5	5	4	4	3	5	3	3
494	4	1	2505	60	1	2	2	1	#NULL!	1	#NULL!	#NULL!	#NULL!	#NULL!	#NULL!	#NULL!	1	1	65	165	23.8751	4	4	92	5	3	5	5	5	5	5	5	3	5	2	5	5	4	5	5	5	5	4	5	5	5	1	5	5
495	4	2	2522	43	1	3	4	1	#NULL!	1	#NULL!	#NULL!	#NULL!	#NULL!	#NULL!	#NULL!	1	1	58	160	22.6562	1	4	78	5	3	5	5	5	5	5	5	5	5	3	5	5	4	4	4	4	4	3	3	3	5	1	5	5
496	4	2	2525	40	1	3	2	1	#NULL!	1	#NULL!	#NULL!	#NULL!	#NULL!	#NULL!	#NULL!	1	1	89	160	34.7656	1	4	106	5	5	5	5	5	5	5	5	5	5	2	5	5	5	5	5	4	4	4	2	3	5	1	5	5
497	4	1	2521	44	1	2	3	1	#NULL!	1	#NULL!	#NULL!	#NULL!	#NULL!	#NULL!	#NULL!	1	1	54	150	24	1	1	82	4	3	4	4	4	4	4	4	4	4	3	3	4	4	4	4	3	4	2	4	4	4	4	4	3
498	4	2	2518	47	1	2	2	1	#NULL!	1	#NULL!	#NULL!	#NULL!	#NULL!	#NULL!	#NULL!	1	1	65	150	28.8889	1	5	92	3	3	3	4	4	4	4	4	5	4	3	4	3	3	4	4	3	4	2	3	3	4	4	4	3
499	4	2	2517	48	1	2	4	1	#NULL!	1	#NULL!	#NULL!	#NULL!	#NULL!	#NULL!	#NULL!	1	2	69	150	30.6667	1	5	92	2	3	4	4	4	4	4	4	4	4	3	4	4	2	4	4	3	4	4	3	4	4	4	4	4
500	4	2	2516	49	1	2	2	1	#NULL!	1	#NULL!	#NULL!	#NULL!	#NULL!	#NULL!	#NULL!	1	1	68	160	26.5625	1	1	92	3	3	4	4	4	4	4	4	4	4	2	4	4	4	4	5	2	4	3	3	4	4	4	4	4
501	4	2	2515	50	1	2	3	1	#NULL!	1	#NULL!	#NULL!	#NULL!	#NULL!	#NULL!	#NULL!	2	1	69	152	29.865	1	5	96	3	3	4	4	4	4	5	5	4	4	2	4	4	4	3	3	3	4	4	4	4	4	5	5	4
502	4	2	2520	45	1	2	2	1	#NULL!	1	#NULL!	#NULL!	#NULL!	#NULL!	#NULL!	#NULL!	1	1	50	150	22.2222	1	1	70	3	4	4	4	4	3	4	4	5	4	5	4	4	4	4	5	2	4	3	3	4	4	4	4	4
503	4	2	2520	45	1	1	4	1	#NULL!	1	#NULL!	#NULL!	#NULL!	#NULL!	#NULL!	#NULL!	1	1	57	162	21.7193	1	5	78	4	5	4	3	4	3	4	4	2	4	4	3	4	3	3	4	3	3	4	3	3	3	3	4	2
504	4	2	2496	69	1	4	2	1	#NULL!	1	#NULL!	#NULL!	#NULL!	#NULL!	#NULL!	#NULL!	1	1	45	150	20	1	1	73	3	3	3	4	4	3	4	3	5	3	3	3	4	3	3	3	3	4	2	3	3	4	3	4	4
505	4	2	2510	55	1	4	2	1	#NULL!	1	#NULL!	#NULL!	#NULL!	#NULL!	#NULL!	#NULL!	1	1	57	152	24.6711	1	1	91	3	5	4	3	4	4	4	3	5	4	4	5	4	5	3	2	2	4	4	3	3	4	5	5	1
506	4	2	2494	71	1	4	2	1	#NULL!	1	#NULL!	#NULL!	#NULL!	#NULL!	#NULL!	#NULL!	1	1	64	165	23.5078	5	1	95	5	3	4	4	4	3	5	4	3	4	2	4	4	4	4	4	4	4	4	4	4	4	4	4	4
507	4	2	2516	49	1	2	2	1	#NULL!	1	#NULL!	#NULL!	#NULL!	#NULL!	#NULL!	#NULL!	1	1	53	146	24.864	1	1	80	4	3	3	3	4	3	3	3	5	3	5	3	3	4	3	3	3	3	3	3	3	3	4	4	4
508	4	2	2520	45	1	2	4	1	#NULL!	1	#NULL!	#NULL!	#NULL!	#NULL!	#NULL!	#NULL!	1	1	58	165	21.3039	1	5	80	4	4	4	4	4	4	4	4	4	4	4	4	4	4	4	4	3	4	3	4	4	3	4	4	4
509	4	1	2507	58	1	2	4	1	#NULL!	1	#NULL!	#NULL!	#NULL!	#NULL!	#NULL!	#NULL!	1	1	52	160	20.3125	5	5	70	5	5	4	5	4	4	3	4	5	2	3	3	3	4	5	5	3	3	5	2	4	4	4	4	1
510	4	1	2505	60	1	2	4	1	#NULL!	1	#NULL!	#NULL!	#NULL!	#NULL!	#NULL!	#NULL!	1	1	53	153	22.6409	5	5	75	5	5	4	5	3	4	4	4	5	4	3	4	4	4	5	5	4	3	5	3	5	4	3	5	1
511	4	1	2507	58	1	2	2	1	#NULL!	1	#NULL!	#NULL!	#NULL!	#NULL!	#NULL!	#NULL!	1	1	48	162	18.2899	5	5	71	4	4	4	5	5	5	5	5	5	3	3	4	4	4	3	3	4	4	4	3	4	5	5	5	4
512	4	1	2498	67	1	4	3	1	#NULL!	1	#NULL!	#NULL!	#NULL!	#NULL!	#NULL!	#NULL!	1	1	69	168	24.4473	1	5	90	4	3	4	4	4	4	4	4	5	4	4	4	4	3	4	4	4	4	3	4	4	4	4	4	3
513	4	1	2507	58	1	1	3	1	#NULL!	1	#NULL!	#NULL!	#NULL!	#NULL!	#NULL!	#NULL!	1	1	60	160	23.4375	4	5	85	4	4	4	4	4	4	3	4	4	4	2	4	4	4	4	4	3	4	4	4	4	4	4	4	3
514	4	1	2502	63	1	2	4	1	#NULL!	1	#NULL!	#NULL!	#NULL!	#NULL!	#NULL!	#NULL!	1	1	60	160	23.4375	1	5	80	4	3	4	5	5	4	4	4	3	4	2	4	4	4	4	4	4	4	5	4	5	5	4	4	4
515	4	1	2507	58	1	2	2	1	#NULL!	1	#NULL!	#NULL!	#NULL!	#NULL!	#NULL!	#NULL!	1	1	59	170	20.4152	5	5	76	4	4	3	5	4	4	4	4	5	4	5	3	3	3	4	3	3	4	3	3	4	4	3	3	3
516	4	1	2507	58	1	2	2	1	#NULL!	2	0	0	0	0	0	1	1	1	60	170	20.7612	4	4	85	1	3	3	5	5	5	5	3	4	3	3	3	5	5	5	3	5	5	5	5	5	3	5	3	3
517	4	1	2513	52	1	2	3	1	#NULL!	1	#NULL!	#NULL!	#NULL!	#NULL!	#NULL!	#NULL!	1	1	63	160	24.6094	5	5	82	3	4	3	4	4	4	4	5	4	4	4	4	4	4	3	3	2	5	4	4	4	4	4	4	4
518	4	1	2501	64	1	2	2	1	#NULL!	1	#NULL!	#NULL!	#NULL!	#NULL!	#NULL!	#NULL!	1	1	54	171	18.4672	1	4	77	3	4	3	5	3	5	5	4	4	3	4	3	2	5	3	2	5	3	5	5	5	3	4	5	5
519	4	1	2516	49	1	2	4	1	#NULL!	1	#NULL!	#NULL!	#NULL!	#NULL!	#NULL!	#NULL!	1	1	48	167	17.2111	1	1	78	3	5	3	4	3	3	3	3	5	3	4	3	4	3	4	4	3	5	4	3	4	5	3	4	4
520	4	1	2508	57	1	2	4	1	#NULL!	1	#NULL!	#NULL!	#NULL!	#NULL!	#NULL!	#NULL!	1	1	50	155	20.8117	5	1	68	4	3	4	4	4	4	4	4	2	4	5	4	4	4	4	4	3	4	4	4	4	4	4	4	4
521	4	1	2512	53	1	2	4	1	#NULL!	1	#NULL!	#NULL!	#NULL!	#NULL!	#NULL!	#NULL!	1	1	56	159	22.151	1	5	77	4	3	4	4	3	4	4	4	4	4	4	4	4	4	4	4	3	4	4	3	4	4	4	4	4
522	4	2	2526	39	1	2	2	1	#NULL!	1	#NULL!	#NULL!	#NULL!	#NULL!	#NULL!	#NULL!	1	1	53	158	21.2306	1	1	73	3	2	4	4	4	3	3	4	5	4	3	3	3	4	4	4	4	3	3	4	4	4	4	4	4
523	4	2	2507	58	1	2	3	1	#NULL!	1	#NULL!	#NULL!	#NULL!	#NULL!	#NULL!	#NULL!	1	1	45	157	18.2563	1	1	70	4	5	3	4	3	3	3	3	4	3	5	3	3	3	4	3	3	4	4	4	4	4	4	4	3
524	4	2	2511	54	1	2	2	1	#NULL!	1	#NULL!	#NULL!	#NULL!	#NULL!	#NULL!	#NULL!	1	1	69	154	29.0943	1	1	106	3	4	3	4	4	3	3	3	5	3	4	3	3	3	3	4	4	3	3	3	3	4	3	4	3
525	4	2	2521	44	1	2	2	2	#NULL!	1	#NULL!	#NULL!	#NULL!	#NULL!	#NULL!	#NULL!	1	1	52	151	22.806	1	1	79	4	4	4	2	3	3	3	3	5	3	4	4	4	4	4	4	3	3	3	3	3	4	4	4	3
526	4	2	2494	71	1	2	2	1	#NULL!	1	#NULL!	#NULL!	#NULL!	#NULL!	#NULL!	#NULL!	1	2	52	158	20.83	1	1	82	3	4	4	4	3	3	3	3	4	3	3	3	3	3	3	3	3	4	4	4	4	2	4	2	3
527	4	1	2490	75	1	2	2	1	#NULL!	1	#NULL!	#NULL!	#NULL!	#NULL!	#NULL!	#NULL!	1	1	73	170	25.2595	1	5	91	4	4	4	4	4	4	4	4	5	3	5	4	4	4	4	4	2	4	4	2	4	4	4	4	3
528	4	1	2512	53	1	2	6	4	#NULL!	2	0	0	0	0	0	1	1	1	76	172	25.6896	1	1	86	4	4	3	4	3	3	3	3	4	3	5	3	3	3	4	3	3	4	3	3	3	3	3	5	3
529	4	2	2514	51	1	5	2	1	#NULL!	1	#NULL!	#NULL!	#NULL!	#NULL!	#NULL!	#NULL!	1	1	46	162	17.5278	1	1	74	4	5	4	3	4	4	4	4	3	4	4	4	4	4	4	4	4	5	5	4	4	3	4	4	4
530	4	2	2498	67	1	2	2	1	#NULL!	1	#NULL!	#NULL!	#NULL!	#NULL!	#NULL!	#NULL!	1	1	56	149	25.2241	1	1	90	3	3	4	4	4	4	5	5	5	4	2	3	4	5	4	4	3	5	5	5	5	4	4	4	4
651	4	1	2499	66	1	2	2	1	#NULL!	1	#NULL!	#NULL!	#NULL!	#NULL!	#NULL!	#NULL!	1	1	73	165	26.8136	1	1	93	3	2	4	3	3	4	3	4	4	3	4	3	2	2	3	3	2	4	2	3	3	3	3	3	3
652	4	2	2497	68	1	2	2	1	#NULL!	1	#NULL!	#NULL!	#NULL!	#NULL!	#NULL!	#NULL!	1	1	70	155	29.1363	1	1	96	3	3	3	3	3	4	3	4	3	4	3	3	3	3	4	4	3	4	3	3	4	4	3	4	3
653	4	2	2503	62	1	2	4	1	#NULL!	1	#NULL!	#NULL!	#NULL!	#NULL!	#NULL!	#NULL!	1	1	61	165	22.4059	1	1	84	3	4	3	3	3	3	3	4	5	3	3	3	4	3	4	3	3	4	4	4	3	4	4	4	4
654	4	2	2496	69	1	2	2	1	#NULL!	1	#NULL!	#NULL!	#NULL!	#NULL!	#NULL!	#NULL!	1	1	70	163	26.3465	1	1	106	4	2	4	3	4	4	4	3	5	4	2	3	3	4	4	3	3	4	4	4	4	4	4	4	4
655	4	2	2525	40	1	2	3	1	#NULL!	1	#NULL!	#NULL!	#NULL!	#NULL!	#NULL!	#NULL!	1	1	70	150	31.1111	1	1	90	5	3	5	4	5	5	5	5	2	4	3	4	4	4	4	5	4	4	5	4	4	4	5	4	5
656	4	2	2514	51	1	1	2	1	#NULL!	1	#NULL!	#NULL!	#NULL!	#NULL!	#NULL!	#NULL!	1	1	53	155	22.0604	1	1	81	3	3	5	5	5	5	5	5	3	4	3	4	5	5	5	4	5	3	4	5	4	5	5	5	5
657	4	1	2527	38	1	1	3	1	#NULL!	1	#NULL!	#NULL!	#NULL!	#NULL!	#NULL!	#NULL!	1	1	58	160	22.6562	5	5	79	4	3	4	3	4	4	4	4	3	4	3	4	4	4	4	4	4	4	4	4	4	4	4	4	3
658	4	1	2507	58	1	2	3	1	#NULL!	1	#NULL!	#NULL!	#NULL!	#NULL!	#NULL!	#NULL!	1	1	49	165	17.9982	4	5	70	4	2	4	4	4	4	4	4	3	4	3	4	4	4	4	4	3	4	4	4	4	4	4	4	3
659	4	1	2493	72	1	2	2	1	#NULL!	1	#NULL!	#NULL!	#NULL!	#NULL!	#NULL!	#NULL!	1	1	52	162	19.8141	4	4	78	4	2	3	4	4	4	4	4	4	3	3	3	3	3	3	3	3	4	5	4	4	3	3	3	3
660	4	1	2505	60	1	2	2	4	#NULL!	1	#NULL!	#NULL!	#NULL!	#NULL!	#NULL!	#NULL!	1	1	52	165	19.1001	5	5	77	4	5	3	2	4	4	4	4	5	3	5	3	3	4	4	3	3	3	5	3	4	3	3	3	3
661	4	2	2510	55	1	2	2	1	#NULL!	1	#NULL!	#NULL!	#NULL!	#NULL!	#NULL!	#NULL!	1	1	55	155	22.8928	1	5	85	3	5	4	5	4	4	4	5	3	3	3	4	4	4	3	3	3	3	1	3	4	4	4	3	3
662	4	2	2513	52	1	2	4	2	#NULL!	1	#NULL!	#NULL!	#NULL!	#NULL!	#NULL!	#NULL!	1	1	73	165	26.8136	5	5	88	2	5	5	5	5	5	4	3	2	5	3	5	5	5	5	5	2	5	5	4	3	5	5	5	2
663	4	2	2515	50	1	2	2	1	#NULL!	1	#NULL!	#NULL!	#NULL!	#NULL!	#NULL!	#NULL!	1	1	82	165	30.1194	4	5	101	4	3	4	4	4	4	4	4	4	4	2	4	4	4	4	3	4	4	4	4	4	4	4	4	3
664	4	1	2512	53	1	2	2	1	#NULL!	1	#NULL!	#NULL!	#NULL!	#NULL!	#NULL!	#NULL!	1	1	42	160	16.4062	1	1	69	4	2	4	4	4	4	4	4	3	4	3	4	4	4	4	4	4	4	4	4	4	4	4	4	3
665	4	1	2514	51	1	2	2	1	#NULL!	1	#NULL!	#NULL!	#NULL!	#NULL!	#NULL!	#NULL!	1	1	70	172	23.6614	1	5	82	4	3	3	5	5	4	4	4	3	4	2	3	3	4	4	4	4	4	5	3	4	4	4	4	4
666	4	1	2510	55	1	2	2	4	#NULL!	1	#NULL!	#NULL!	#NULL!	#NULL!	#NULL!	#NULL!	1	1	67	159	26.5021	1	5	94	4	3	5	5	5	5	5	5	4	5	3	5	5	5	5	5	3	5	5	3	5	5	5	5	4
667	4	1	2520	45	1	2	3	1	#NULL!	1	#NULL!	#NULL!	#NULL!	#NULL!	#NULL!	#NULL!	1	1	55	158	22.0317	4	5	80	4	3	4	4	4	4	4	4	4	5	2	5	5	4	4	4	4	4	5	4	5	5	5	5	3
668	4	1	2512	53	1	2	2	1	#NULL!	1	#NULL!	#NULL!	#NULL!	#NULL!	#NULL!	#NULL!	1	1	62	160	24.2187	5	1	80	3	2	3	3	3	3	3	3	5	3	2	4	4	3	4	3	3	4	4	4	3	4	3	4	4
669	4	1	2511	54	1	2	2	1	#NULL!	1	#NULL!	#NULL!	#NULL!	#NULL!	#NULL!	#NULL!	1	1	52	159	20.5688	1	1	83	2	5	4	4	4	4	3	3	5	3	5	3	4	4	4	4	4	5	5	3	4	5	4	4	4
670	4	2	2519	46	1	2	3	7	#NULL!	1	#NULL!	#NULL!	#NULL!	#NULL!	#NULL!	#NULL!	1	1	66	169	23.1084	1	1	78	5	4	4	4	5	4	5	5	4	4	2	4	4	4	4	2	4	4	5	4	4	4	4	4	4
671	4	2	2496	69	1	2	2	1	#NULL!	1	#NULL!	#NULL!	#NULL!	#NULL!	#NULL!	#NULL!	1	1	45	140	22.9592	1	1	78	4	4	4	4	4	4	4	4	4	4	2	4	4	4	4	4	4	4	4	4	4	4	4	4	3
672	4	1	2513	52	1	2	2	1	#NULL!	1	#NULL!	#NULL!	#NULL!	#NULL!	#NULL!	#NULL!	1	1	55	160	21.4844	1	5	77	4	5	4	4	4	4	4	4	5	4	3	4	4	3	4	4	3	4	4	3	4	4	4	4	4
673	4	2	2513	52	1	2	2	1	#NULL!	1	#NULL!	#NULL!	#NULL!	#NULL!	#NULL!	#NULL!	1	2	78	155	32.4662	1	1	93	3	4	4	2	3	3	3	3	4	3	3	3	4	3	4	4	4	3	3	3	3	4	3	3	3
674	4	2	2514	51	1	2	4	1	#NULL!	1	#NULL!	#NULL!	#NULL!	#NULL!	#NULL!	#NULL!	1	1	78	160	30.4687	1	1	105	3	4	4	4	4	4	4	5	5	3	4	4	4	4	4	4	5	5	4	4	4	4	4	4	4
675	4	1	2507	58	1	2	4	1	#NULL!	1	#NULL!	#NULL!	#NULL!	#NULL!	#NULL!	#NULL!	1	1	75	165	27.5482	1	1	103	3	4	3	3	3	3	3	3	5	2	1	3	3	3	3	4	3	4	3	3	4	4	3	4	4
676	4	2	2515	50	1	1	3	2	#NULL!	1	#NULL!	#NULL!	#NULL!	#NULL!	#NULL!	#NULL!	2	1	74	155	30.8012	1	1	104	3	4	3	3	3	3	3	3	3	3	2	3	3	3	4	3	3	4	3	3	3	4	3	4	3
677	4	2	2510	55	1	2	4	1	#NULL!	1	#NULL!	#NULL!	#NULL!	#NULL!	#NULL!	#NULL!	2	1	70	155	29.1363	1	1	92	3	4	3	4	3	4	3	3	3	3	2	4	4	3	3	3	3	4	3	3	3	3	4	4	3
678	4	2	2506	59	1	2	5	3	#NULL!	1	#NULL!	#NULL!	#NULL!	#NULL!	#NULL!	#NULL!	1	1	69	150	30.6667	1	5	95	3	5	5	5	5	5	5	5	5	5	5	5	5	5	5	5	5	5	5	5	5	5	5	5	2
679	4	2	2510	55	1	2	3	1	#NULL!	1	#NULL!	#NULL!	#NULL!	#NULL!	#NULL!	#NULL!	1	1	53	150	23.5556	1	5	91	3	5	4	5	5	4	5	5	5	5	3	5	5	4	5	5	4	5	5	5	5	5	5	5	3
680	4	2	2517	48	1	1	4	1	#NULL!	1	#NULL!	#NULL!	#NULL!	#NULL!	#NULL!	#NULL!	1	1	52	150	23.1111	1	4	93	4	5	4	5	5	5	5	5	5	4	5	4	4	4	4	4	4	4	4	4	4	4	4	4	3
681	4	2	2509	56	1	2	2	1	#NULL!	1	#NULL!	#NULL!	#NULL!	#NULL!	#NULL!	#NULL!	1	1	66	164	24.539	1	1	83	4	3	4	3	4	3	4	4	4	3	3	4	3	3	4	4	3	4	3	3	4	3	3	4	4
682	4	2	2509	56	1	1	3	1	#NULL!	1	#NULL!	#NULL!	#NULL!	#NULL!	#NULL!	#NULL!	1	1	46	150	20.4444	1	1	71	4	4	4	4	4	4	4	4	3	4	5	4	5	4	4	4	4	5	4	3	4	4	4	4	4
683	4	2	2508	57	1	1	2	1	#NULL!	1	#NULL!	#NULL!	#NULL!	#NULL!	#NULL!	#NULL!	2	1	50	158	20.0288	1	1	72	4	5	4	4	4	5	4	4	5	4	5	4	4	4	4	5	3	4	3	4	4	4	4	4	2
684	4	2	2505	60	1	1	2	2	#NULL!	1	#NULL!	#NULL!	#NULL!	#NULL!	#NULL!	#NULL!	1	1	53	160	20.7031	1	1	72	4	4	4	4	4	4	5	5	2	4	2	4	3	3	3	3	3	4	4	3	3	4	4	4	2
685	4	2	2505	60	1	4	2	2	#NULL!	1	#NULL!	#NULL!	#NULL!	#NULL!	#NULL!	#NULL!	1	1	62	150	27.5556	1	1	95	4	4	4	4	5	4	4	4	5	4	5	4	4	4	4	4	4	5	3	4	3	4	4	4	2
686	4	2	2510	55	1	4	2	1	#NULL!	1	#NULL!	#NULL!	#NULL!	#NULL!	#NULL!	#NULL!	1	1	40	155	16.6493	1	1	74	3	2	3	4	3	3	3	3	4	3	5	3	4	4	3	3	3	5	4	4	4	3	3	3	2
687	4	2	2509	56	1	2	2	1	#NULL!	1	#NULL!	#NULL!	#NULL!	#NULL!	#NULL!	#NULL!	1	2	54	160	21.0937	1	1	80	3	3	4	4	4	4	4	4	5	4	4	4	4	4	3	4	4	4	4	4	4	4	4	4	5
688	4	2	2509	56	1	2	2	2	#NULL!	1	#NULL!	#NULL!	#NULL!	#NULL!	#NULL!	#NULL!	1	1	52	166	18.8707	1	1	68	3	3	3	2	3	4	4	3	4	4	3	4	4	4	3	3	3	3	2	2	3	4	3	4	3
689	4	2	2508	57	1	4	2	1	#NULL!	1	#NULL!	#NULL!	#NULL!	#NULL!	#NULL!	#NULL!	1	1	65	153	27.7671	1	1	90	4	3	4	2	3	3	3	3	4	3	2	3	3	4	3	3	3	4	3	2	3	4	3	4	3
690	4	2	2510	55	1	2	2	1	#NULL!	1	#NULL!	#NULL!	#NULL!	#NULL!	#NULL!	#NULL!	2	1	68	155	28.3039	1	5	94	4	3	4	4	4	5	4	3	3	4	3	4	3	3	4	3	2	4	4	4	3	4	4	4	4
691	4	2	2506	59	1	4	2	3	#NULL!	1	#NULL!	#NULL!	#NULL!	#NULL!	#NULL!	#NULL!	1	1	51	153	21.7865	1	1	84	4	2	4	4	4	4	4	3	5	3	5	4	4	4	4	4	4	3	3	4	4	4	4	4	4
692	4	2	2510	55	1	2	2	1	#NULL!	1	#NULL!	#NULL!	#NULL!	#NULL!	#NULL!	#NULL!	1	1	58	165	21.3039	1	1	86	3	3	3	4	3	4	4	3	5	4	5	4	4	4	3	3	4	4	4	4	3	4	3	4	3
693	4	2	2516	49	1	2	2	1	#NULL!	1	#NULL!	#NULL!	#NULL!	#NULL!	#NULL!	#NULL!	1	1	65	153	27.7671	1	4	88	4	3	3	4	4	4	3	3	4	4	2	4	3	3	4	4	3	3	4	3	4	3	4	3	4
694	4	2	2508	57	1	1	2	1	#NULL!	1	#NULL!	#NULL!	#NULL!	#NULL!	#NULL!	#NULL!	1	1	52	159	20.5688	1	4	76	3	5	3	3	3	2	4	4	4	3	3	3	4	3	4	3	3	4	3	2	4	4	4	4	4
695	4	2	2507	58	1	2	2	1	#NULL!	1	#NULL!	#NULL!	#NULL!	#NULL!	#NULL!	#NULL!	1	1	79	165	29.0174	1	5	103	3	4	3	4	3	4	3	3	5	3	4	4	4	4	3	4	3	4	4	4	3	4	4	4	4
[truncated: 1 more columns]

## Sheet: Group 1
Group	Sex	BirthYear	Age	Religion	Maritalstatus	Educationlevel	Occupation	diagnosisYr	UD	HUD1	HUD2	HUD3	HUD4	HUD5	HUD6	Histparalysis	HistCVD	Weight	Height	BMI	Smoking	Alcohol	Circumwaist	QL1	QL2	QL3	QL4	QL5	QL6	QL7	QL8	QL9	QL10	QL11	QL12	QL13	QL14	QL15	QL16	QL17	QL18	QL19	QL20	QL21	QL22	QL23	QL24	QL25	QL26
1	1	2544	21	1	1	4	2	#NULL!	2	0	0	1	0	0	0	1	1	65	170	22.4913	1	1	86	4	3	4	5	5	4	4	4	3	4	3	5	5	5	5	5	5	5	5	4	5	5	4	4	4	5
1	2	2539	26	1	1	3	6	#NULL!	2	0	0	1	0	0	0	1	1	82	167	29.4023	1	1	101	3	5	3	3	3	3	3	3	5	3	5	2	2	3	2	2	3	2	2	3	3	3	3	3	3	3
1	1	2539	26	1	2	3	2	#NULL!	2	0	0	1	0	0	0	1	1	58	170	20.0692	5	1	81	4	4	4	4	4	5	5	5	5	4	3	4	4	3	4	4	4	3	2	3	3	3	4	3	3	3
1	2	2537	28	2	5	4	2	#NULL!	2	0	0	1	0	0	0	1	1	43	156	17.6693	1	1	70	4	2	4	4	4	4	4	4	2	4	2	4	4	4	3	3	3	4	4	4	4	4	4	4	4	3
1	2	2535	30	1	5	6	2	#NULL!	2	0	0	1	0	0	0	1	1	60	151	26.3146	1	5	76	4	4	2	1	2	3	2	3	5	3	2	5	5	5	5	5	3	5	5	5	5	5	5	5	5	5
1	2	2534	31	1	2	4	2	#NULL!	2	0	0	1	0	0	0	1	1	64	152	27.7008	1	1	86	5	3	4	5	4	4	4	4	2	4	2	5	5	5	5	5	5	5	5	5	5	5	5	5	5	5
1	1	2530	35	1	5	5	2	#NULL!	2	0	0	1	0	0	1	1	1	71	165	26.079	5	4	81	3	3	4	5	4	4	4	4	4	4	2	4	3	1	2	2	3	3	4	4	4	4	4	4	4	3
1	2	2525	40	1	5	2	2	#NULL!	2	0	0	1	1	0	0	1	1	57	150	25.3333	1	1	74	4	2	4	3	3	4	3	3	4	4	2	4	3	3	4	4	3	4	2	3	4	4	3	4	3	3
1	1	2525	40	1	2	3	1	#NULL!	2	0	1	1	0	0	0	1	1	65	171	22.2291	4	1	75	4	4	3	4	5	5	5	5	5	4	5	4	4	4	3	3	4	4	3	4	4	3	4	5	5	4
1	1	2524	41	1	5	5	6	#NULL!	2	0	0	1	0	0	0	2	1	65	170	22.4913	1	1	93	3	4	4	3	3	3	3	3	4	3	4	3	3	3	3	3	3	4	3	3	3	4	4	3	4	4
1	2	2523	42	2	2	2	2	4	2	0	0	1	1	0	0	1	1	53	140	27.0408	1	1	81	4	3	4	3	3	4	4	3	5	3	2	4	3	4	3	4	4	4	3	4	4	3	4	4	4	4
1	2	2522	43	1	2	2	1	#NULL!	2	0	0	1	0	0	0	1	1	84	155	34.9636	1	1	109	4	1	3	4	4	4	4	3	2	3	1	4	3	4	3	4	4	4	5	4	3	4	4	4	4	4
1	1	2521	44	1	2	3	4	#NULL!	2	0	0	1	0	0	0	1	1	53	158	21.2306	5	1	81	3	5	3	2	3	3	3	3	4	3	5	3	3	3	3	3	2	3	4	3	3	3	3	4	4	4
1	1	2520	45	1	2	2	1	#NULL!	2	0	0	1	0	0	0	1	1	90	182	27.1706	1	5	92	3	4	5	2	3	3	3	3	5	4	4	4	3	4	4	4	2	3	4	3	3	3	4	4	5	3
1	1	2520	45	1	2	2	2	5	2	0	0	1	1	0	0	1	1	65	165	23.8751	5	5	81	2	4	3	2	3	3	3	3	3	3	2	3	3	3	3	3	4	3	3	3	3	4	3	4	3	4
1	2	2520	45	1	2	2	1	4	2	0	0	1	1	0	0	1	1	65	155	27.0552	1	1	90	4	2	4	2	3	3	3	3	5	4	4	3	4	3	3	3	4	5	5	3	4	5	4	5	4	4
1	2	2519	46	1	2	2	1	#NULL!	2	0	0	1	0	0	0	2	1	58	160	22.6562	1	2	75	4	4	4	4	4	4	4	4	3	4	3	4	4	4	4	4	4	4	4	4	4	4	4	4	4	3
1	2	2519	46	1	3	2	1	14	2	0	0	1	1	0	0	1	1	49	149	22.0711	1	5	76	4	1	4	5	3	4	4	4	1	3	3	4	4	3	4	4	2	4	5	4	4	5	4	4	4	4
1	1	2518	47	1	2	2	1	4	2	0	0	1	1	0	0	1	1	65	160	25.3906	5	1	81	4	2	4	4	3	3	4	4	5	3	3	4	4	4	5	4	4	4	4	5	5	4	4	4	4	4
1	1	2517	48	1	2	1	1	2	2	0	0	1	1	0	0	2	1	88	167	31.5537	3	5	110	1	4	2	4	4	3	3	3	3	3	3	3	3	3	3	3	4	3	4	3	3	4	4	3	3	3
1	2	2517	48	2	3	4	7	#NULL!	2	0	0	1	0	0	0	1	1	79	160	30.8594	1	5	114	4	3	4	5	4	4	4	4	5	4	4	4	4	4	4	4	3	4	4	4	4	4	4	4	4	4
1	2	2517	48	1	2	2	1	9	2	0	0	1	1	0	1	1	1	62	145	29.4887	1	1	87	3	3	4	1	3	3	3	3	3	3	2	4	4	4	4	4	2	4	4	3	4	4	4	4	3	2
1	1	2517	48	1	2	5	1	#NULL!	2	0	0	1	0	1	0	1	1	70	170	24.2215	5	5	80	3	5	3	1	3	3	3	3	5	4	4	3	4	4	4	4	3	4	5	4	4	4	3	5	5	4
1	2	2517	48	1	2	2	1	10	2	0	0	1	0	0	0	1	1	65	160	25.3906	1	1	86	3	3	3	1	3	3	3	3	5	3	5	3	3	3	3	4	4	4	5	3	3	3	4	4	4	4
1	2	2517	48	1	2	2	7	#NULL!	2	0	0	1	0	0	0	1	1	59	150	26.2222	1	1	77	4	2	4	4	4	4	4	4	2	4	2	4	4	5	4	5	4	2	3	3	3	3	3	2	3	3
1	1	2516	49	1	2	2	1	#NULL!	2	0	0	1	0	0	0	1	1	73	170	25.2595	5	4	80	3	2	4	4	4	4	4	4	2	4	2	4	3	4	4	4	4	4	4	4	4	4	5	4	4	3
1	1	2516	49	1	2	3	1	#NULL!	2	1	0	1	0	0	0	1	1	73	171	24.9649	1	1	91	3	5	3	4	4	4	4	4	4	4	5	4	4	3	4	4	3	4	3	3	4	4	3	4	4	4
1	2	2516	49	1	2	2	1	10	2	0	1	1	1	0	0	1	1	42	155	17.4818	1	1	75	3	4	3	4	4	3	3	3	5	4	5	4	3	3	4	3	3	4	4	3	3	3	3	3	4	4
1	2	2515	50	1	2	2	3	#NULL!	2	0	0	1	0	0	1	1	1	65	170	22.4913	1	5	76	4	3	4	4	4	4	4	4	5	4	2	4	3	3	4	4	3	4	4	4	4	4	4	4	4	3
1	1	2515	50	1	2	3	1	#NULL!	2	0	0	1	0	0	0	1	1	80	172	27.0416	1	5	91	4	4	4	5	3	3	4	5	5	5	4	4	4	5	4	4	5	4	4	5	5	5	5	5	5	5
1	2	2514	51	1	2	4	6	#NULL!	2	0	0	1	0	0	1	1	1	103	187	29.4547	1	5	109	3	3	3	2	3	4	4	3	3	4	3	3	3	3	4	4	5	3	5	2	3	5	5	5	3	3
1	1	2514	51	1	2	2	1	#NULL!	2	0	0	1	0	0	0	1	1	76	156	31.2295	1	1	91	3	4	4	3	3	4	4	4	4	3	4	3	4	3	4	4	5	3	3	4	4	3	3	3	4	4
1	1	2514	51	1	2	2	3	#NULL!	2	0	0	1	0	0	0	1	1	58	160	22.6562	5	5	81	4	2	4	5	4	4	4	4	4	4	2	4	4	4	4	4	4	4	3	3	4	4	4	4	4	4
1	1	2514	51	1	5	6	4	3	2	0	0	1	1	0	0	2	1	75	170	25.9516	5	5	101	4	4	4	3	4	4	4	3	5	4	3	4	4	4	3	4	4	4	3	4	4	4	4	5	4	4
1	2	2514	51	1	2	2	1	1	2	0	0	1	1	0	0	1	1	37	145	17.5981	5	5	80	3	3	3	3	3	3	3	3	2	3	2	2	3	2	3	3	3	3	2	3	3	3	2	3	4	4
1	2	2513	52	1	3	2	2	2	2	0	0	1	1	0	0	1	1	48	150	21.3333	1	1	68	4	2	3	2	2	3	3	3	3	3	2	4	5	3	3	3	1	3	4	4	3	3	4	4	4	2
1	1	2513	52	1	2	2	1	2	2	0	0	1	1	0	0	1	1	67	160	26.1719	2	2	94	3	4	4	3	3	4	3	4	5	4	4	4	4	4	4	4	3	4	4	4	4	4	4	4	3	3
1	1	2513	52	1	2	2	1	#NULL!	2	0	0	1	1	0	0	1	1	54	159	21.3599	1	5	75	4	3	5	5	4	4	4	3	5	4	4	4	5	4	4	4	4	5	2	4	4	5	5	5	4	4
1	2	2513	52	1	2	2	2	5	2	0	0	1	1	0	0	1	1	50	140	25.5102	1	2	80	3	3	3	3	2	3	2	3	2	3	2	4	4	4	4	4	4	4	4	4	4	4	4	4	4	3
1	1	2513	52	1	2	6	3	#NULL!	2	0	0	1	0	0	0	1	1	65	165	23.8751	5	5	76	4	3	5	5	4	4	4	4	5	2	2	4	3	4	4	4	5	4	5	3	4	5	5	5	4	5
1	1	2512	53	1	2	2	1	4	2	1	0	1	1	0	0	1	2	69	155	28.7201	2	5	81	3	3	4	5	4	4	4	4	4	4	3	4	4	3	3	3	2	3	3	3	3	4	4	4	4	3
1	1	2512	53	1	2	2	1	#NULL!	2	0	0	1	0	0	0	1	1	50	170	17.301	5	5	74	4	5	4	3	4	4	4	4	4	4	4	3	3	4	4	4	2	3	5	5	4	4	4	4	5	4
1	1	2512	53	1	2	2	3	3	2	0	0	1	1	0	0	1	1	75	169	26.2596	1	4	91	4	3	2	2	4	4	3	5	3	4	2	2	4	3	5	5	3	4	3	5	4	4	5	1	4	4
1	2	2512	53	1	2	2	2	#NULL!	2	0	0	1	1	0	0	1	1	55	150	24.4444	5	1	78	5	4	2	3	2	2	2	2	4	2	3	2	3	4	3	3	4	4	5	3	4	5	3	5	2	3
1	1	2512	53	1	1	2	2	1	2	0	0	1	1	0	0	1	1	57	176	18.4013	5	5	73	4	5	4	5	4	4	3	4	5	4	4	4	4	4	5	4	3	4	4	4	5	4	4	5	5	1
1	1	2512	53	1	2	3	2	#NULL!	2	0	0	1	0	0	0	1	1	60	170	20.7612	1	5	99	4	5	4	4	4	5	5	5	5	4	4	4	4	4	5	5	4	4	5	4	4	4	4	4	4	4
1	1	2512	53	1	2	2	2	#NULL!	2	0	0	1	0	0	0	1	1	63	167	22.5896	1	5	91	3	3	3	1	2	2	2	2	3	3	3	3	3	3	3	3	2	3	4	2	2	2	2	3	3	3
1	1	2512	53	1	2	4	2	#NULL!	2	0	0	1	0	0	0	1	1	72	171	24.623	5	5	96	4	3	4	5	4	4	4	4	4	4	5	4	4	4	4	4	4	3	3	4	4	5	5	4	4	4
1	2	2511	54	1	2	4	3	#NULL!	2	0	0	1	1	0	0	1	1	60	157	24.3418	1	1	76	1	3	5	3	4	4	4	4	3	4	3	4	4	3	4	4	4	4	3	2	4	4	4	5	5	4
1	1	2511	54	1	2	2	1	5	2	0	0	1	1	0	0	1	1	62	166	22.4996	5	5	75	3	2	4	4	4	4	4	4	3	4	2	4	3	3	4	4	3	4	4	4	4	4	4	4	4	3
1	1	2511	54	1	2	4	3	#NULL!	2	0	0	1	0	0	0	1	1	68	163	25.5937	5	5	84	4	2	4	4	4	4	4	4	5	4	5	4	4	4	4	4	3	4	4	4	4	4	4	4	4	3
1	2	2511	54	1	2	2	1	7	2	0	0	1	1	0	0	1	1	54	150	24	1	1	80	3	4	3	4	3	4	4	4	4	4	3	4	4	4	4	4	3	4	4	4	4	4	4	5	3	3
1	2	2511	54	1	2	2	1	4	2	0	0	1	1	0	0	1	1	38	150	16.8889	1	1	70	3	3	4	3	3	4	4	4	3	4	3	3	3	4	4	4	4	3	3	3	3	3	4	4	4	4
1	1	2511	54	1	2	2	2	#NULL!	2	0	0	1	0	0	0	1	1	58	165	21.3039	5	5	91	5	5	4	4	4	3	3	4	5	4	5	4	4	3	4	3	3	4	4	4	4	4	4	4	4	4
1	2	2510	55	1	4	2	1	#NULL!	2	0	0	1	0	0	0	1	1	50	165	18.3655	1	5	79	2	4	4	4	4	4	5	3	3	4	3	3	4	5	5	5	4	5	1	4	4	3	5	3	3	1
1	2	2510	55	1	4	2	1	#NULL!	2	0	0	1	0	0	1	2	1	63	140	32.1429	1	1	86	2	3	2	2	2	3	3	2	2	2	2	2	2	3	2	3	3	2	1	3	3	3	2	3	3	3
1	2	2510	55	1	2	2	6	#NULL!	2	0	0	1	0	0	0	1	1	50	165	18.3655	1	1	80	4	3	3	2	4	3	3	3	4	3	4	3	3	4	3	3	4	4	4	4	3	3	4	4	4	4
1	1	2509	56	1	5	6	4	#NULL!	2	0	0	1	0	0	0	1	1	67	169	23.4586	2	2	86	3	3	4	4	4	4	4	4	3	4	3	4	3	4	4	4	3	4	4	4	4	4	4	4	2	4
1	2	2509	56	1	1	6	4	#NULL!	2	0	0	1	0	0	0	1	1	45	155	18.7305	1	1	70	3	5	4	4	4	5	4	4	5	4	2	4	4	5	4	4	4	4	5	5	5	4	4	5	5	4
1	2	2509	56	1	5	2	1	1	2	0	0	1	1	0	0	1	1	60	145	28.5375	1	1	86	4	3	4	4	4	4	4	3	4	4	5	4	3	3	3	3	2	3	4	4	4	4	3	4	2	2
1	2	2509	56	1	4	1	6	5	2	0	0	1	1	0	1	1	1	70	165	25.7117	1	1	101	2	5	2	5	3	2	3	3	5	3	5	3	3	4	4	4	4	5	5	3	4	5	3	2	3	3
1	2	2508	57	1	2	2	1	#NULL!	2	0	0	1	0	0	0	1	1	47	160	18.3594	5	1	70	3	4	3	2	2	2	2	4	3	3	3	2	3	3	3	4	4	4	4	3	4	4	3	3	4	4
1	1	2508	57	1	2	2	1	#NULL!	2	0	0	1	0	0	0	1	1	60	155	24.974	1	5	96	3	3	3	4	3	4	4	4	5	4	4	3	4	4	4	4	3	4	4	3	4	4	4	4	5	3
1	1	2508	57	1	2	2	1	#NULL!	2	0	0	1	0	0	0	1	1	70	159	27.6888	1	5	90	3	4	3	3	3	3	3	3	5	3	4	3	3	3	4	4	4	4	5	4	4	4	4	4	4	4
1	1	2508	57	1	2	5	2	#NULL!	2	0	0	1	0	0	0	1	1	57	162	21.7193	5	5	76	5	4	4	4	3	4	3	3	3	4	4	4	4	4	4	4	4	4	5	5	5	5	5	5	4	4
1	1	2507	58	1	2	2	2	#NULL!	2	0	0	1	0	0	0	1	2	72	172	24.3375	1	3	80	3	5	5	3	5	5	3	5	3	5	2	5	5	5	5	3	3	5	3	3	3	3	5	5	5	3
1	2	2507	58	1	2	2	1	10	2	0	0	1	1	0	0	2	1	45	150	20	1	5	73	3	4	4	3	3	3	3	3	4	4	3	4	3	3	3	3	3	4	3	4	4	4	4	4	4	3
1	1	2507	58	1	2	2	1	#NULL!	2	0	0	1	0	0	0	1	1	63	170	21.7993	2	5	83	3	2	4	4	4	4	4	4	3	4	4	4	4	4	4	4	4	4	4	4	4	4	4	4	4	3
1	1	2507	58	1	5	4	2	#NULL!	2	0	0	1	0	0	0	1	1	57	153	24.3496	5	5	78	4	2	5	4	4	4	4	4	4	5	3	5	5	5	4	4	4	5	4	4	4	5	5	5	5	4
1	1	2507	58	1	2	2	4	#NULL!	2	0	0	1	0	0	0	2	1	65	165	23.8751	5	1	90	4	3	4	4	4	4	3	3	4	3	4	3	3	3	3	4	3	4	4	4	4	4	4	4	4	4
1	2	2507	58	1	2	2	1	1	2	0	0	1	1	0	1	1	1	70	175	22.8571	1	1	76	3	5	4	1	5	4	3	3	1	3	3	3	4	3	4	3	2	4	3	3	4	5	4	5	3	2
1	2	2506	59	1	2	7	4	#NULL!	2	0	0	1	0	0	0	1	1	72	164	26.7698	1	4	88	3	3	4	2	4	3	4	4	3	4	3	5	5	5	5	5	4	5	5	2	5	4	4	4	4	3
1	1	2506	59	2	2	2	3	5	2	1	0	1	1	0	0	1	1	73	165	26.8136	2	2	96	2	4	2	2	2	2	2	2	2	1	2	4	4	4	3	3	3	3	3	3	3	3	3	1	1	3
1	2	2506	59	1	5	4	7	24	2	0	0	1	1	0	1	1	1	58	156	23.833	2	3	79	3	3	4	2	3	4	4	4	4	4	3	4	3	3	4	4	4	5	5	5	3	4	4	3	3	4
1	1	2506	59	1	2	2	3	#NULL!	2	0	0	1	0	0	0	1	1	60	173	20.0474	5	5	80	4	4	4	4	4	4	4	4	4	4	3	4	4	3	3	4	4	4	1	4	4	4	4	4	4	4
1	1	2506	59	1	2	6	4	#NULL!	2	0	0	1	0	0	0	1	1	86	173	28.7347	1	1	90	4	5	2	4	4	3	3	3	5	4	5	3	4	3	3	4	5	4	5	4	3	3	4	4	4	4
1	1	2506	59	1	2	4	2	#NULL!	2	0	0	1	0	0	0	1	1	55	160	21.4844	5	1	81	4	2	4	4	4	4	4	4	5	4	4	4	4	4	3	4	3	4	5	3	4	3	3	3	4	4
1	2	2506	59	1	2	1	6	8	2	0	0	1	1	0	0	2	1	45	150	20	1	1	85	4	3	2	1	3	3	3	3	3	4	4	4	3	4	3	3	3	4	4	3	3	4	4	4	4	4
1	2	2505	60	1	2	2	1	10	2	0	1	1	1	0	0	2	1	80	143	39.1217	1	5	80	3	4	4	4	3	3	3	3	5	4	4	4	4	4	4	4	3	4	4	4	4	4	4	4	4	2
1	1	2505	60	1	2	4	3	3	2	0	0	1	1	0	0	1	1	52	165	19.1001	5	5	75	2	3	4	1	3	3	3	2	4	3	5	3	3	3	3	3	3	4	5	3	4	4	4	4	4	4
1	1	2504	61	1	2	2	1	3	2	0	0	1	1	0	0	1	1	50	161	19.2894	5	1	76	3	4	3	4	4	4	4	4	5	2	3	3	3	3	3	3	3	3	3	2	4	4	4	4	3	3
1	2	2504	61	1	2	2	1	#NULL!	2	0	0	1	0	0	1	1	2	70	150	31.1111	1	1	104	1	4	3	5	5	4	4	4	3	4	3	5	4	4	5	4	5	5	1	5	5	4	5	4	5	4
1	1	2504	61	1	2	2	1	#NULL!	2	0	0	1	0	0	0	1	1	65	176	20.984	1	5	93	3	4	3	3	3	3	3	3	3	3	3	3	3	3	3	5	2	3	3	4	3	4	4	4	4	3
1	1	2504	61	1	2	2	1	10	2	1	0	1	1	0	0	1	1	42	155	17.4818	4	4	73	4	3	2	5	4	4	3	3	4	3	4	3	4	4	4	5	4	3	3	5	4	4	4	3	4	4
1	2	2503	62	1	4	2	1	5	2	0	0	1	1	0	0	1	1	55	150	24.4444	1	5	86	3	3	4	3	4	4	4	4	2	3	4	4	4	4	4	4	3	5	4	4	4	3	4	4	4	4
1	1	2503	62	1	2	2	6	16	2	0	0	1	0	0	0	1	2	58	160	22.6562	1	5	91	4	3	3	1	2	3	2	2	2	2	3	4	3	4	3	3	2	4	2	2	2	2	2	1	2	2
1	2	2502	63	1	4	2	1	10	2	0	0	1	1	0	0	1	1	73	155	30.385	1	1	112	3	4	4	3	3	3	4	3	2	3	2	4	4	4	4	4	3	4	3	3	3	4	4	4	5	3
1	1	2502	63	1	2	2	1	#NULL!	2	0	0	1	0	0	0	1	1	47	158	18.8271	2	5	71	5	4	5	5	5	5	5	4	2	5	2	5	4	4	4	4	3	4	3	4	4	4	5	5	4	3
1	1	2502	63	1	2	2	1	6	2	0	0	1	1	0	0	1	1	76	163	28.6048	5	5	90	3	4	4	5	4	4	4	4	5	4	4	4	5	5	4	4	3	4	4	4	4	4	4	4	4	3
1	2	2502	63	1	2	2	1	#NULL!	2	0	0	1	1	0	1	1	1	51	148	23.2834	1	1	82	5	2	5	4	4	4	5	4	5	5	5	5	4	4	4	4	3	5	4	5	4	5	5	5	4	3
1	1	2502	63	1	3	4	4	#NULL!	2	0	0	1	0	0	0	1	1	64	162	24.3865	4	4	80	4	3	3	4	4	4	4	4	5	4	4	3	3	3	4	4	2	3	4	3	3	3	2	2	2	3
1	1	2502	63	1	2	7	4	#NULL!	2	0	0	1	0	0	0	1	1	54	165	19.8347	4	4	69	4	3	4	4	4	4	4	4	1	4	1	4	4	4	4	4	3	5	4	3	5	5	5	5	5	4
1	1	2502	63	1	2	2	3	14	2	0	0	1	1	0	0	1	1	45	158	18.026	1	4	82	4	5	5	3	4	4	4	4	4	4	3	4	3	4	5	5	5	4	1	5	5	5	4	5	5	4
1	2	2502	63	1	2	2	1	40	2	0	0	1	1	0	0	1	1	60	165	22.0386	1	1	96	2	2	3	1	3	3	2	3	4	2	5	3	3	2	2	3	4	3	1	3	4	3	4	4	4	4
1	1	2502	63	1	2	3	1	2	2	0	0	1	0	0	0	1	1	60	156	24.6548	4	4	83	4	4	4	3	4	3	3	4	4	3	1	3	4	3	4	4	1	4	5	4	3	4	4	4	4	3
1	1	2502	63	1	2	2	1	#NULL!	2	0	0	1	0	0	0	1	1	45	155	18.7305	5	5	85	4	3	4	5	4	3	4	4	5	2	5	4	4	3	3	4	5	4	3	2	2	4	4	4	4	5
1	1	2502	63	1	2	5	1	#NULL!	2	0	0	1	0	0	0	1	1	67	170	23.1834	1	1	97	4	3	3	5	3	4	4	4	3	3	3	4	3	3	3	3	3	3	4	4	4	4	4	3	4	4
1	2	2502	63	1	2	2	6	12	2	0	0	1	0	0	0	1	1	65	160	25.3906	1	1	81	4	3	3	4	4	3	3	4	4	4	2	3	4	3	3	4	4	4	4	3	4	4	4	3	4	4
1	1	2502	63	1	2	2	6	#NULL!	2	0	0	1	0	0	1	1	1	46	155	19.1467	4	4	95	3	5	3	3	3	3	3	3	3	3	4	4	3	3	4	3	4	3	4	3	4	3	3	3	3	3
1	2	2501	64	1	2	2	1	#NULL!	2	0	0	1	0	0	0	1	1	51	150	22.6667	1	1	72	5	3	5	5	5	5	5	4	4	4	5	4	3	2	3	3	3	4	4	4	3	4	4	4	3	3
1	1	2501	64	1	2	2	1	#NULL!	2	0	0	1	0	0	0	1	1	67	165	24.6097	2	5	90	3	4	4	5	3	3	4	3	5	4	4	3	4	3	4	3	4	4	4	3	4	4	4	4	4	3
1	1	2501	64	1	2	2	1	#NULL!	2	0	0	1	0	0	0	1	1	40	159	15.8222	5	4	70	4	5	4	5	4	4	4	4	5	4	2	4	4	4	4	4	4	5	4	4	4	4	4	4	4	4
1	2	2501	64	1	2	2	6	10	2	0	0	1	0	0	0	1	1	64	150	28.4444	1	1	96	3	2	3	2	3	3	3	3	3	4	2	3	3	3	4	4	3	4	2	3	2	3	3	3	3	3
1	1	2501	64	1	2	2	6	#NULL!	2	0	0	1	0	0	0	1	1	65	162	24.7676	5	1	82	4	4	4	4	4	4	4	4	5	4	5	3	3	3	4	3	3	3	4	3	3	3	3	3	3	4
1	2	2500	65	1	2	2	1	2	2	0	0	1	1	0	0	1	1	60	152	25.9695	1	1	76	3	5	4	3	4	4	4	3	5	4	4	4	4	4	4	4	3	4	3	4	4	4	4	4	3	3
1	2	2500	65	2	2	2	1	10	2	0	0	1	1	0	1	1	2	61	159	24.1288	1	5	76	3	2	4	3	4	4	4	3	5	4	2	4	4	3	3	3	3	4	4	4	4	4	4	4	4	3
1	1	2500	65	1	2	2	6	#NULL!	2	0	0	1	0	0	0	1	1	50	174	16.5147	5	4	80	4	2	4	4	4	4	4	4	5	4	2	4	4	4	4	3	4	4	4	4	4	5	4	4	5	5
1	2	2500	65	1	2	2	1	25	2	0	0	1	1	0	0	1	1	53	150	23.5556	1	1	86	3	5	3	1	3	4	4	3	5	4	4	2	3	3	4	3	3	5	1	4	3	4	3	4	4	4
1	1	2500	65	1	2	6	4	#NULL!	2	0	0	1	0	0	0	1	1	70	165	25.7117	5	5	86	4	3	3	4	4	4	4	3	2	3	2	4	5	4	3	5	5	4	4	3	4	5	5	5	5	5
1	1	2500	65	1	2	2	1	#NULL!	2	0	1	1	0	0	0	1	1	45	165	16.5289	1	1	80	4	4	4	5	3	4	4	4	4	4	4	3	3	4	3	3	3	3	4	4	3	5	4	5	4	4
1	1	2499	66	1	4	4	1	#NULL!	2	1	0	1	0	0	1	2	1	50	140	25.5102	1	1	87	1	3	1	4	3	2	2	3	5	3	3	1	4	4	3	3	3	4	3	3	3	2	3	2	3	3
1	1	2499	66	1	2	5	4	8	2	0	0	1	1	0	0	1	1	65	165	23.8751	1	5	65	3	3	3	4	4	4	5	4	3	3	4	4	4	4	4	4	4	4	4	4	4	4	4	3	4	3
1	2	2499	66	1	2	2	8	3	2	1	0	1	1	0	0	1	1	43	150	19.1111	2	3	80	3	3	4	3	3	4	4	4	4	4	2	4	4	4	3	3	3	4	4	4	4	4	4	4	4	3
1	2	2499	66	1	2	2	1	#NULL!	2	0	0	1	0	0	0	1	1	45	150	20	1	1	68	4	4	4	1	4	3	3	4	2	5	5	5	2	2	2	5	5	3	5	3	3	4	4	2	5	5
1	1	2499	66	1	2	7	4	15	2	0	0	1	1	0	0	1	1	44	160	17.1875	1	1	81	4	5	4	3	4	4	4	4	3	5	2	3	3	4	4	4	5	3	3	4	4	2	5	1	4	4
1	1	2499	66	1	2	2	1	4	2	0	0	1	0	0	0	1	1	70	168	24.8016	5	1	91	3	2	3	2	3	3	3	3	5	3	4	4	4	2	3	2	2	2	4	2	2	1	1	1	3	3
1	1	2498	67	1	2	3	1	#NULL!	2	0	0	1	0	0	0	1	1	78	164	29.0006	2	2	90	5	5	5	5	5	5	5	5	5	5	4	5	5	5	5	5	4	5	5	5	5	5	5	5	5	4
1	1	2498	67	1	2	2	1	#NULL!	2	0	1	1	0	0	0	1	1	55	165	20.202	4	1	81	3	4	2	2	3	4	3	3	3	3	2	3	2	2	4	4	2	4	1	3	3	4	4	3	5	3
1	1	2498	67	1	2	2	1	20	2	0	0	1	1	0	0	1	1	60	168	21.2585	5	5	101	3	2	4	4	3	3	4	3	3	3	2	3	4	4	3	4	3	3	2	3	4	3	3	4	5	3
1	1	2498	67	1	2	2	1	#NULL!	2	0	0	1	0	0	0	1	1	56	160	21.875	5	4	72	4	3	4	2	4	4	4	4	4	4	2	4	3	4	4	4	1	4	5	4	4	4	4	4	4	4
1	1	2498	67	1	2	3	1	4	2	0	0	1	1	0	0	1	1	47	150	20.8889	1	2	78	1	4	3	3	4	3	4	4	5	4	4	2	4	4	3	5	3	4	4	3	5	3	5	2	3	3
1	2	2497	68	1	2	2	7	#NULL!	2	0	0	1	1	0	0	1	1	48	155	19.9792	1	1	99	3	3	4	4	4	4	4	4	4	3	3	4	4	4	3	3	2	3	3	2	3	4	4	4	3	3
1	2	2497	68	1	4	2	1	#NULL!	2	0	0	1	0	0	0	1	1	75	155	31.2175	1	1	93	2	3	2	1	2	3	2	3	5	4	3	5	4	4	5	5	3	4	5	2	3	4	3	3	4	3
1	2	2497	68	1	4	2	1	#NULL!	2	0	0	1	0	0	0	1	1	50	140	25.5102	1	1	78	5	4	3	5	3	3	4	4	5	5	4	3	3	4	4	5	3	5	2	3	4	5	3	4	3	3
1	2	2497	68	1	2	2	1	10	2	0	0	1	1	0	0	1	1	50	150	22.2222	1	1	81	3	2	2	2	3	3	3	3	5	2	4	3	3	3	4	4	4	3	3	4	3	4	3	3	4	3
1	1	2496	69	1	2	2	1	#NULL!	2	0	0	1	0	0	0	1	1	55	165	20.202	1	5	81	4	3	2	2	3	3	3	3	4	3	2	2	3	3	2	2	3	3	4	3	3	3	3	3	3	3
1	2	2496	69	1	4	2	6	19	2	0	0	1	0	0	0	1	1	50	160	19.5312	1	1	91	4	4	3	2	3	3	3	3	4	3	3	4	3	3	2	3	3	3	4	3	3	3	4	4	4	4
1	1	2496	69	1	2	2	6	#NULL!	2	0	0	1	0	0	0	1	1	70	165	25.7117	1	1	105	4	3	3	4	3	4	4	4	4	3	3	4	3	3	4	3	3	4	4	4	4	3	3	3	3	4
1	1	2495	70	1	2	2	1	#NULL!	2	0	0	1	0	0	0	1	1	45	150	20	4	4	76	2	2	4	2	3	3	4	4	2	3	3	3	4	4	4	4	3	4	4	3	4	5	5	5	4	3
1	1	2495	70	1	4	2	6	#NULL!	2	0	0	1	0	0	0	1	1	65	170	22.4913	5	1	86	4	3	4	1	3	4	4	4	5	3	5	3	3	4	4	4	2	3	4	3	3	4	4	4	4	4
1	2	2494	71	1	4	2	6	1	2	0	0	1	1	0	0	1	1	50	153	21.3593	1	1	74	3	4	4	3	4	4	4	4	5	4	3	4	3	3	4	4	3	4	2	4	4	4	4	4	3	3
1	1	2494	71	1	2	2	6	#NULL!	2	0	0	1	0	0	0	1	1	53	160	20.7031	1	1	83	4	5	3	4	4	4	3	4	5	4	4	4	4	3	4	4	4	3	4	4	4	3	4	2	5	3
1	2	2494	71	1	2	2	1	20	2	0	0	1	1	0	0	1	1	60	160	23.4375	1	1	81	4	2	4	4	4	4	4	4	2	4	3	4	4	5	4	4	4	5	4	5	4	4	5	4	4	4
1	1	2494	71	1	2	2	3	#NULL!	2	0	0	1	0	0	0	1	1	71	168	25.1559	1	5	91	3	2	3	2	3	3	3	3	3	3	3	3	3	3	3	3	5	4	5	5	5	4	4	4	5	5
1	1	2494	71	1	2	2	1	#NULL!	2	0	0	1	0	0	0	1	1	67	170	23.1834	5	1	80	4	3	4	5	4	4	4	4	4	3	2	4	4	3	4	4	3	4	4	3	4	4	5	5	5	5
1	1	2493	72	1	2	4	6	6	2	0	0	1	1	0	0	1	1	71	159	28.0843	1	5	82	4	3	4	5	4	4	4	3	3	4	3	4	4	4	4	4	4	4	4	4	4	4	4	4	4	4
1	1	2493	72	1	2	2	2	30	2	0	0	1	1	0	0	1	1	64	163	24.0882	3	3	70	3	4	4	5	3	3	3	3	2	4	1	4	4	3	3	3	2	3	3	3	3	4	4	4	2	3
1	2	2493	72	1	2	2	6	40	2	0	1	1	0	0	0	2	1	45	160	17.5781	1	1	73	3	4	1	1	3	3	4	4	3	3	4	3	4	4	3	3	1	4	5	4	3	4	4	3	4	4
1	2	2493	72	1	5	2	6	#NULL!	2	0	0	1	0	0	0	1	1	45	140	22.9592	1	1	81	2	5	1	4	2	2	2	2	5	2	4	2	3	2	3	3	2	2	3	2	2	2	2	2	3	3
1	2	2493	72	1	4	2	6	9	2	0	0	1	1	0	0	1	1	105	150	46.6667	1	1	110	4	2	3	3	4	3	3	3	3	3	3	4	3	3	4	3	4	3	4	4	4	3	4	4	4	3
1	2	2492	73	1	4	2	1	#NULL!	2	0	0	1	0	0	0	1	1	50	155	20.8117	1	1	86	3	2	3	4	4	4	4	3	4	3	3	3	4	4	4	3	2	3	2	3	3	3	4	4	1	3
1	2	2492	73	1	2	2	6	15	2	0	0	0	1	0	0	1	1	55	150	24.4444	1	1	100	3	5	2	4	4	3	3	3	5	3	4	3	4	4	4	4	4	4	3	3	4	3	4	2	2	3
1	2	2492	73	1	5	2	6	#NULL!	2	0	0	1	0	0	0	1	1	65	151	28.5075	1	1	86	4	3	4	4	4	4	4	4	3	5	2	3	4	4	4	4	3	4	4	4	4	3	4	3	1	3
1	2	2492	73	1	2	2	1	40	2	0	0	1	1	0	0	1	1	48	155	19.9792	1	1	83	4	2	2	2	3	2	2	3	3	3	2	3	3	2	4	4	3	3	5	4	4	3	3	4	4	4
1	2	2492	73	1	4	2	6	#NULL!	2	0	0	1	0	0	0	1	1	50	163	18.8189	1	1	86	3	1	2	2	4	4	4	4	5	4	3	3	3	3	4	4	4	3	5	3	3	3	4	4	1	4
1	1	2492	73	1	2	2	1	6	2	0	0	1	1	0	0	1	1	65	150	28.8889	1	1	103	4	4	3	4	3	3	4	3	5	4	5	3	4	3	4	3	3	4	3	3	4	4	4	4	4	4
1	1	2491	74	1	2	2	1	#NULL!	2	0	0	1	0	0	1	1	1	56	160	21.875	1	1	80	4	4	4	2	4	4	4	4	5	4	3	4	4	4	4	4	3	4	3	4	4	4	4	4	5	4
1	1	2491	74	1	2	2	3	#NULL!	2	0	0	1	0	0	0	1	1	51	170	17.6471	5	5	81	4	4	3	3	4	4	4	4	5	3	4	4	4	3	3	4	3	3	3	4	4	3	3	3	4	4
1	1	2490	75	1	2	2	1	10	2	0	0	1	1	0	0	1	1	54	165	19.8347	1	3	76	1	3	3	5	5	5	5	5	2	4	3	3	5	4	4	4	3	4	4	5	3	3	4	3	4	4
1	1	2490	75	1	2	2	1	#NULL!	2	0	1	1	0	0	0	1	1	50	168	17.7154	5	5	90	3	3	4	3	4	4	4	4	5	4	4	3	4	4	4	3	3	3	4	4	3	3	3	3	3	3
1	1	2490	75	1	2	2	4	20	2	1	0	1	1	0	0	1	1	67	170	23.1834	4	4	81	3	4	3	4	3	3	3	3	3	4	5	4	4	4	4	4	2	4	5	3	4	4	4	4	5	4
1	2	2490	75	1	2	2	6	20	2	0	0	1	1	0	0	1	1	70	175	22.8571	1	1	86	4	3	4	5	4	5	4	4	5	4	3	4	4	4	5	5	4	3	5	4	4	5	5	5	4	4
1	1	2490	75	1	2	4	1	#NULL!	2	0	0	1	0	0	0	1	1	65	160	25.3906	4	4	86	4	4	4	5	4	4	4	3	3	3	3	3	4	3	3	4	3	4	5	3	4	4	4	3	4	4
1	1	2490	75	1	4	2	6	5	2	0	0	1	1	0	1	1	1	75	155	31.2175	1	1	83	5	3	4	5	4	4	4	4	3	4	3	5	4	4	4	5	5	4	5	4	3	3	4	4	3	4

## Sheet: Group 2
Group	Sex	BirthYear	Age	Religion	Maritalstatus	Educationlevel	Occupation	diagnosisYr	UD	HUD1	HUD2	HUD3	HUD4	HUD5	HUD6	Histparalysis	HistCVD	Weight	Height	BMI	Smoking	Alcohol	Circumwaist	QL1	QL2	QL3	QL4	QL5	QL6	QL7	QL8	QL9	QL10	QL11	QL12	QL13	QL14	QL15	QL16	QL17	QL18	QL19	QL20	QL21	QL22	QL23	QL24	QL25	QL26
2	2	2522	43	1	2	2	1	3	2	0	0	0	1	0	1	1	1	69	152	29.865	1	1	102	3	4	4	4	3	4	3	4	5	3	4	4	5	3	3	4	3	3	2	4	4	4	5	5	1	4
2	1	2521	44	1	1	5	2	3	2	0	0	0	1	0	0	1	1	100	165	36.7309	1	5	120	2	3	4	3	3	3	3	3	5	3	2	4	4	3	3	4	3	4	4	4	3	3	4	4	4	3
2	1	2521	44	1	5	6	5	2	2	0	0	0	1	0	0	1	1	74	165	27.1809	1	5	84	2	3	2	3	4	3	4	4	3	4	2	4	4	4	4	3	4	4	3	4	3	3	4	4	3	3
2	1	2520	45	1	2	4	1	3	2	0	0	0	1	0	0	1	1	57	165	20.9366	1	5	78	4	5	4	3	4	4	4	4	5	4	5	4	4	4	5	4	4	3	5	4	4	2	4	5	4	5
2	1	2520	45	1	2	4	1	2	2	0	0	0	1	0	0	1	1	115	185	33.6012	1	5	98	4	3	4	4	4	4	4	4	5	4	3	4	4	4	4	4	4	4	4	4	4	4	4	4	4	4
2	2	2520	45	1	2	2	1	7	2	0	0	0	1	0	0	1	1	45	143	22.006	1	1	76	3	3	3	4	3	3	3	4	5	4	5	4	3	3	4	5	3	4	4	5	4	4	4	4	4	5
2	2	2519	46	1	2	2	1	8	2	0	0	0	1	0	0	1	1	75	165	27.5482	1	1	107	3	3	5	3	4	4	4	4	3	4	2	4	4	5	5	5	4	5	4	4	5	5	3	5	4	3
2	2	2519	46	1	4	2	1	10	2	0	0	0	1	0	0	1	1	50	155	20.8117	1	1	75	3	4	3	3	4	3	4	4	5	4	3	4	4	4	3	4	3	4	3	3	4	4	4	4	3	4
2	2	2519	46	1	2	2	1	1	2	0	0	0	1	0	0	1	1	73	160	28.5156	1	1	94	5	2	3	4	4	4	4	4	3	5	5	4	4	4	4	4	4	5	4	3	3	3	5	3	3	3
2	1	2518	47	1	1	2	1	7	2	0	0	0	1	0	0	1	1	58	160	22.6562	5	5	76	5	2	5	5	5	5	4	4	5	5	3	4	4	4	4	4	3	4	5	5	5	5	5	5	5	4
2	2	2518	47	1	2	2	1	5	2	0	0	0	1	0	0	1	1	47	158	18.8271	1	1	69	3	5	3	4	3	3	3	4	3	4	3	3	3	4	4	4	4	5	3	4	4	3	4	3	3	3
2	2	2517	48	1	2	2	1	13	2	0	0	0	1	0	0	1	1	52	158	20.83	1	2	84	3	2	2	2	4	4	4	4	3	4	2	4	4	5	5	5	4	4	4	4	4	4	4	5	4	4
2	1	2517	48	1	2	5	5	1	2	0	0	0	1	0	0	2	1	65	165	23.8751	5	4	82	3	5	3	3	4	3	3	4	3	4	3	4	4	4	3	4	4	3	3	3	4	3	4	4	4	4
2	2	2517	48	1	2	2	1	3	2	0	0	0	1	0	0	2	1	58	158	23.2335	1	1	87	3	3	3	4	4	4	4	4	3	4	2	3	5	4	5	5	4	5	4	4	4	5	4	5	3	3
2	1	2516	49	1	2	5	1	5	2	0	0	0	1	0	0	1	1	73	170	25.2595	1	5	81	4	4	3	4	3	4	4	4	5	4	4	4	4	4	4	4	4	3	4	4	4	4	4	4	4	3
2	2	2516	49	1	2	4	1	10	2	0	0	0	1	0	0	1	1	50	165	18.3655	1	1	73	4	5	4	4	4	4	4	4	3	4	3	4	3	3	4	3	3	4	3	3	4	3	5	3	3	3
2	1	2516	49	2	2	5	3	5	2	0	0	0	1	0	0	1	1	83	175	27.102	1	5	87	4	3	4	4	4	4	4	4	3	3	3	4	4	4	4	4	3	4	4	4	4	3	3	5	3	3
2	1	2516	49	1	1	5	1	5	2	0	0	0	1	0	0	1	1	75	165	27.5482	1	5	93	3	2	3	2	5	5	4	2	2	1	2	4	4	4	4	4	4	4	4	5	5	5	4	5	3	4
2	2	2516	49	1	2	2	1	10	2	0	0	0	1	0	0	1	1	59	158	23.634	1	1	94	3	3	4	4	4	4	3	3	5	3	5	3	3	3	3	4	3	4	3	2	4	3	3	3	3	3
2	2	2515	50	1	2	4	1	2	2	0	0	0	1	0	0	1	1	64	150	28.4444	1	1	99	2	5	1	2	2	2	2	2	4	2	4	3	3	4	3	3	2	3	3	3	3	3	3	3	2	3
2	2	2515	50	1	4	4	1	1	2	0	0	0	1	0	0	1	1	72	156	29.5858	1	1	93	2	4	4	4	4	4	4	5	5	4	4	4	4	4	4	4	4	3	4	4	4	4	4	4	4	1
2	1	2515	50	1	2	3	1	6	2	0	0	0	1	0	0	1	1	82	163	30.863	5	5	105	3	3	3	4	4	4	4	5	4	5	3	4	4	4	4	4	3	4	4	4	4	4	5	4	4	4
2	2	2515	50	1	2	2	1	5	2	0	0	0	1	0	0	1	1	75	175	24.4898	1	1	87	4	5	4	4	4	4	4	4	5	4	4	4	4	4	4	4	4	4	4	4	4	4	4	4	3	4
2	2	2514	51	2	2	3	3	1	2	0	0	0	1	0	0	1	1	87	165	31.9559	1	5	101	4	5	4	4	4	4	4	4	5	3	3	3	3	3	4	3	3	4	3	4	4	4	3	3	3	3
2	2	2514	51	1	2	3	1	8	2	0	0	0	1	0	0	1	1	52	147	24.064	1	1	78	1	4	3	4	4	5	3	3	5	3	4	3	3	3	4	3	3	4	3	3	3	3	3	4	3	3
2	2	2514	51	1	2	2	1	1	2	0	0	0	1	0	0	1	2	65	140	33.1633	1	1	96	3	5	3	2	3	3	3	3	5	3	4	3	3	3	3	3	4	4	3	3	3	4	3	4	4	3
2	2	2514	51	1	2	2	1	10	2	0	0	0	1	0	0	1	1	54	160	21.0937	1	1	75	4	3	4	2	4	4	4	4	5	4	5	4	4	4	4	4	2	4	4	4	5	4	4	5	2	4
2	1	2514	51	1	1	2	1	3	2	0	0	0	1	0	1	2	1	74	169	25.9095	1	1	87	3	2	4	4	4	4	3	5	5	3	2	3	4	4	4	4	5	5	4	4	4	4	5	4	2	3
2	1	2514	51	1	2	2	1	13	2	0	0	0	1	0	0	1	1	50	160	19.5312	3	3	72	3	2	4	5	3	4	4	4	3	3	4	3	4	3	3	3	3	3	5	4	3	3	3	3	3	3
2	2	2513	52	1	1	2	2	14	2	0	0	0	1	0	0	1	1	48	155	19.9792	1	1	73	3	3	3	3	3	4	4	5	2	3	4	3	4	3	3	3	3	4	3	3	3	4	5	5	3	3
2	2	2513	52	2	2	4	3	11	2	0	0	0	1	0	0	1	1	70	165	25.7117	1	1	104	4	5	3	5	4	4	4	4	5	4	3	3	4	4	4	4	3	4	3	4	3	4	4	5	3	3
2	2	2513	52	1	2	2	1	1	2	0	0	0	1	0	0	1	1	63	155	26.2227	1	1	101	4	5	4	3	5	5	5	5	5	4	2	5	5	5	5	4	4	4	4	3	5	5	5	5	3	5
2	2	2513	52	1	1	2	1	12	2	0	0	0	1	0	0	1	1	74	158	29.6427	1	1	98	3	3	3	3	5	4	5	5	2	3	2	3	4	4	4	4	4	5	5	4	4	4	4	4	3	3
2	2	2513	52	1	2	3	3	10	2	0	0	0	1	0	0	1	1	95	170	32.872	2	5	119	4	4	5	5	5	5	5	5	3	4	3	4	4	4	4	4	3	5	5	5	5	5	5	5	2	5
2	2	2512	53	1	3	6	7	1	2	0	0	0	1	0	1	1	1	70	158	28.0404	1	2	93	4	5	4	3	4	4	4	4	2	4	2	4	4	3	4	4	2	4	3	4	4	5	4	4	4	4
2	2	2512	53	1	3	2	1	10	2	0	0	0	1	0	0	1	1	66	160	25.7812	1	1	80	3	5	4	4	4	4	3	3	2	3	2	3	3	4	4	4	4	3	4	4	2	4	4	3	3	3
2	2	2512	53	1	2	2	1	3	2	0	0	0	1	0	0	1	1	69	170	23.8754	1	5	82	4	4	3	4	4	4	4	4	5	3	5	3	3	4	4	3	3	3	4	3	3	3	3	3	3	3
2	2	2512	53	1	4	2	7	5	2	0	0	0	1	0	0	1	1	67	155	27.8876	1	1	100	3	3	2	5	3	3	4	4	4	3	3	4	3	3	3	3	3	4	4	5	5	5	3	5	3	3
2	2	2512	53	1	1	2	1	7	2	0	0	0	1	0	0	1	1	58	145	27.5862	1	1	98	4	2	5	3	5	4	5	5	3	4	3	4	4	4	4	5	3	4	5	4	5	5	5	5	3	4
2	2	2511	54	1	2	3	1	6	2	0	0	0	1	0	0	1	2	71	150	31.5556	1	1	96	4	4	4	3	4	4	5	4	4	1	4	3	4	3	4	5	4	3	4	3	4	4	4	3	3	3
2	2	2511	54	1	2	4	1	13	2	0	0	0	1	0	0	1	1	54	159	21.3599	1	1	83	3	5	5	5	5	5	5	5	5	5	5	5	5	3	4	4	3	2	4	4	4	5	5	5	3	3
2	1	2511	54	1	2	2	1	4	2	0	0	0	1	0	0	1	1	65	160	25.3906	1	1	91	2	3	3	5	4	3	3	3	3	4	4	3	3	4	4	4	3	5	3	3	2	3	3	5	3	3
2	2	2511	54	1	2	2	1	8	2	0	0	0	1	0	0	1	1	62	149	27.9267	1	2	90	4	3	4	5	5	4	4	4	5	5	4	5	4	4	4	4	4	5	5	5	5	5	5	5	4	4
2	2	2511	54	1	2	2	1	10	2	0	0	0	1	0	0	1	1	45	145	21.4031	1	1	70	4	3	4	4	5	4	4	4	4	4	3	4	4	4	4	4	4	5	5	5	5	5	5	5	3	4
2	2	2511	54	1	1	2	1	10	2	0	0	0	1	0	0	1	2	65	150	28.8889	1	1	86	4	5	4	4	4	4	4	4	4	4	5	4	4	4	4	4	4	4	4	4	4	4	4	4	3	4
2	2	2511	54	1	2	2	1	2	2	0	0	0	1	0	0	1	1	62	159	24.5243	1	5	87	3	3	3	4	4	3	4	3	3	3	2	4	4	5	4	3	3	5	4	4	3	4	5	4	4	3
2	2	2510	55	1	1	2	7	10	2	0	0	0	1	0	1	1	1	57	154	24.0344	1	2	85	4	4	4	4	3	4	4	4	4	4	5	4	3	3	3	3	3	4	4	4	4	4	4	4	3	3
2	1	2510	55	1	1	2	1	9	2	0	0	0	1	0	1	2	1	62	165	22.7732	1	5	82	4	4	4	5	4	4	4	4	5	4	2	3	4	3	3	3	3	4	4	4	4	4	3	3	3	4
2	2	2510	55	1	2	2	1	2	2	0	0	0	1	0	0	1	1	61	165	22.4059	1	1	93	3	3	4	4	4	4	4	3	3	4	3	4	4	4	4	3	3	4	4	4	4	4	4	4	3	3
2	2	2510	55	1	4	2	1	3	2	0	0	0	1	0	0	2	1	43	158	17.2248	5	1	76	2	5	2	3	3	3	4	4	5	3	5	3	3	3	3	4	3	4	3	2	3	4	3	3	4	3
2	2	2510	55	1	2	2	1	4	2	0	0	0	1	0	1	2	1	58	150	25.7778	1	5	92	3	3	3	4	4	3	4	4	3	4	3	3	3	3	3	4	3	4	4	3	4	5	4	5	4	4
2	2	2509	56	1	1	4	1	6	2	0	0	0	1	0	0	1	1	54	153	23.0681	1	1	83	4	5	5	5	4	4	5	4	3	5	3	5	4	5	5	5	5	5	3	3	5	5	5	5	1	3
2	2	2509	56	1	2	3	1	11	2	0	0	0	1	0	0	1	1	51	153	21.7865	1	1	76	4	4	4	4	4	4	4	4	5	4	5	4	4	4	4	4	4	4	3	4	4	4	4	4	4	4
2	2	2509	56	1	2	2	1	15	2	0	0	0	1	0	0	1	1	75	150	33.3333	1	1	95	4	4	3	4	4	4	4	4	5	4	5	4	3	4	4	4	4	3	3	4	4	3	4	5	5	3
2	2	2509	56	1	2	1	1	6	2	0	0	0	1	0	0	1	1	62	145	29.4887	1	5	97	5	2	3	4	4	4	4	4	5	4	3	4	4	4	4	4	4	4	4	4	4	4	4	4	3	4
2	1	2509	56	1	2	4	1	8	2	0	0	0	1	0	0	1	1	61	160	23.8281	3	5	92	3	3	4	5	5	5	5	5	3	5	3	5	5	5	5	5	5	5	5	5	4	5	5	5	5	5
2	2	2509	56	1	4	2	1	10	2	0	0	0	1	0	0	1	1	57	155	23.7253	1	1	82	2	5	4	2	3	3	3	3	5	4	2	3	4	4	3	3	2	4	3	3	3	3	4	4	3	3
2	2	2509	56	1	2	2	7	5	2	0	0	0	1	0	0	1	1	72	155	29.9688	1	5	96	4	5	4	4	4	4	4	4	5	4	2	4	4	3	4	4	3	4	2	3	4	4	4	4	3	4
2	2	2509	56	1	4	2	1	12	2	0	0	0	1	0	0	1	1	72	150	32	1	3	100	3	5	3	4	3	4	3	3	5	4	3	4	2	2	3	4	3	4	4	4	3	3	4	3	3	4
2	2	2509	56	1	2	4	1	5	2	0	0	0	1	0	0	1	1	63	160	24.6094	1	1	94	3	3	4	3	5	3	5	5	3	4	5	3	3	3	3	3	3	4	3	3	3	5	5	5	3	5
2	1	2508	57	1	2	2	1	5	2	0	0	0	1	0	0	1	1	55	160	21.4844	2	1	87	4	3	3	3	3	3	3	2	5	2	3	2	2	1	1	4	3	3	2	2	3	4	4	3	3	3
2	2	2508	57	1	2	2	1	10	2	0	0	0	1	0	0	1	1	53	161	20.4467	1	1	82	3	5	4	3	4	4	3	5	5	4	2	4	4	4	4	5	4	3	4	4	4	4	4	4	5	4
2	2	2508	57	1	2	2	1	10	2	0	0	0	1	0	0	2	1	56	165	20.5693	1	1	77	2	2	3	4	3	3	4	4	2	3	2	3	3	3	3	4	4	4	3	3	4	3	3	3	5	4
2	2	2507	58	1	4	2	1	10	2	0	0	0	1	0	0	1	1	60	151	26.3146	1	1	98	2	5	5	5	5	5	4	5	4	5	4	5	5	3	5	5	4	5	5	4	5	5	5	1	1	3
2	1	2507	58	1	2	3	1	18	2	0	0	0	1	0	0	1	1	62	175	20.2449	1	1	73	4	5	4	4	4	4	4	4	5	4	4	3	4	4	4	4	3	4	4	1	4	4	4	4	4	3
2	2	2507	58	1	4	2	1	1	2	0	0	0	1	0	0	1	1	73	160	28.5156	1	2	100	1	3	5	5	5	4	4	4	3	4	5	4	4	4	4	4	3	4	4	4	4	4	5	5	2	3
2	2	2507	58	1	4	4	7	3	2	0	0	0	1	0	0	2	1	70	150	31.1111	1	2	84	3	5	4	4	4	4	4	1	5	4	5	4	3	4	5	4	4	3	4	3	4	4	4	1	4	3
2	1	2507	58	2	1	2	1	3	2	0	0	0	1	0	0	1	1	66	170	22.8374	1	1	89	3	3	4	4	4	4	4	4	4	4	3	3	4	4	4	3	4	4	5	4	4	4	4	5	3	4
2	2	2507	58	2	3	2	3	4	2	0	0	0	1	0	0	1	1	55	147	25.4524	1	1	60	3	3	3	4	4	4	4	4	2	2	2	3	3	3	3	4	3	4	4	4	4	4	4	4	3	3
2	2	2507	58	1	2	4	7	10	2	0	0	0	1	0	0	1	1	59	155	24.5578	1	1	83	3	5	3	4	4	4	4	3	4	4	3	4	4	4	3	3	4	3	4	4	4	4	4	4	3	4
2	2	2507	58	1	2	2	1	10	2	1	0	0	1	0	0	1	1	54	150	24	1	1	84	3	4	4	4	4	4	4	4	4	4	5	4	4	4	4	4	4	4	4	4	4	4	4	4	3	4
2	1	2506	59	1	2	2	1	10	2	0	0	0	1	0	0	1	1	96	160	37.5	1	1	100	4	2	4	2	4	4	4	4	3	3	2	4	3	3	4	4	3	4	4	4	4	3	4	4	4	4
2	1	2506	59	1	2	4	1	1	2	0	0	0	1	0	0	2	1	51	155	21.2279	5	2	89	3	5	4	1	4	4	4	4	5	4	3	5	5	5	5	4	4	4	4	4	4	4	4	4	3	4
2	1	2506	59	1	2	3	1	3	2	0	0	0	1	0	1	1	1	62	165	22.7732	3	3	83	4	3	4	4	4	4	4	4	3	4	2	4	4	4	4	4	4	5	4	4	4	4	4	4	4	4
2	2	2506	59	1	2	2	3	7	2	0	0	0	1	0	0	1	1	59	150	26.2222	1	1	87	2	5	3	4	3	3	3	3	5	3	4	3	3	3	3	3	2	3	4	4	3	3	4	4	3	3
2	1	2505	60	1	2	2	1	3	2	0	0	0	1	0	0	1	1	73	160	28.5156	1	5	92	3	4	4	4	4	4	3	3	5	3	4	3	3	3	3	3	4	3	3	3	4	4	4	4	3	4
2	2	2505	60	1	2	2	1	14	2	0	0	0	1	0	0	1	1	51	155	21.2279	1	5	86	3	2	2	4	3	3	3	4	3	3	4	3	3	3	4	3	2	3	3	4	4	4	4	4	4	3
2	2	2505	60	1	2	2	1	8	2	0	0	0	1	0	0	1	1	71	150	31.5556	1	3	109	4	2	4	4	4	4	4	4	5	4	3	4	4	4	4	4	3	1	1	3	4	4	4	4	4	4
2	1	2505	60	1	1	2	2	8	2	0	0	1	1	0	0	1	1	65	160	25.3906	1	1	88	3	5	3	4	4	3	5	4	2	3	3	3	3	3	3	3	3	4	4	3	4	4	4	4	4	3
2	2	2505	60	1	4	2	1	10	2	0	0	0	1	0	0	1	1	58	155	24.1415	1	1	89	4	3	3	4	3	3	3	3	2	3	2	3	3	3	3	3	3	4	3	3	3	3	3	4	3	3
2	2	2505	60	1	2	2	1	3	2	0	0	0	1	0	0	1	1	54	155	22.4766	1	1	85	4	4	3	5	5	4	4	4	5	4	5	4	5	3	4	4	4	5	5	3	4	4	4	4	3	4
2	2	2505	60	1	2	2	3	2	2	0	0	0	1	0	0	1	1	71	170	24.5675	1	5	90	3	3	4	5	5	5	5	5	5	5	5	4	5	4	5	5	3	4	5	5	5	5	5	5	3	4
2	2	2505	60	1	4	2	1	7	2	0	0	0	1	0	0	1	1	72	150	32	1	1	101	4	3	3	4	4	3	3	3	3	3	3	3	4	4	3	3	3	4	3	3	3	3	3	3	3	3
2	2	2505	60	1	2	2	1	10	2	0	0	0	1	0	0	1	1	68	155	28.3039	1	1	104	3	2	4	3	4	3	3	3	5	4	4	4	4	4	3	3	3	3	2	3	4	4	4	4	4	3
2	2	2505	60	1	2	2	1	23	2	0	0	0	1	0	0	1	2	78	155	32.4662	1	1	105	3	5	3	4	3	3	4	4	5	3	5	3	3	3	4	4	3	4	3	3	4	3	3	3	3	3
2	2	2504	61	1	2	2	2	3	2	0	0	0	1	0	0	1	1	61	160	23.8281	1	1	83	4	5	4	4	4	4	4	4	5	4	5	4	4	3	4	4	3	4	4	4	4	4	4	4	3	3
2	2	2504	61	1	4	2	1	8	2	0	0	0	1	0	0	1	1	85	160	33.2031	1	5	117	3	4	4	4	4	4	4	4	4	4	4	4	5	5	4	4	4	4	4	4	4	4	4	4	4	4
2	1	2504	61	1	2	2	1	5	2	0	0	0	1	0	0	1	1	63	161	24.3046	5	5	89	4	4	4	4	4	3	4	4	5	3	4	3	4	4	4	4	3	4	4	2	4	4	4	4	4	3
2	2	2504	61	2	2	2	2	12	2	0	0	0	1	0	0	1	1	76	170	26.2976	1	5	103	3	2	3	4	4	3	4	4	5	3	3	3	4	4	3	2	4	4	4	4	4	4	4	4	3	4
2	1	2504	61	1	1	2	2	6	2	0	0	0	1	0	0	1	1	66	162	25.1486	1	1	89	3	3	4	4	4	4	4	4	5	4	3	3	4	4	4	4	3	4	5	4	4	4	4	4	4	4
2	1	2504	61	1	2	2	2	20	2	0	0	0	1	0	0	1	1	60	160	23.4375	1	1	79	3	2	3	4	4	4	4	4	4	3	2	3	3	4	4	4	4	3	3	3	4	4	4	3	3	4
2	2	2504	61	1	2	2	1	10	2	0	0	0	1	0	0	1	1	60	165	22.0386	1	1	94	3	5	3	3	4	3	3	3	5	4	5	4	4	4	4	3	4	4	2	3	3	4	4	4	4	3
2	1	2504	61	1	2	2	1	6	2	0	0	0	1	0	0	1	1	52	173	17.3745	2	5	76	3	5	3	5	5	5	5	1	3	1	2	5	4	5	5	2	5	4	4	5	5	4	5	4	5	4
2	2	2504	61	1	2	2	1	5	2	0	0	0	1	0	0	1	1	75	157	30.4272	1	1	99	3	4	3	3	3	3	4	4	4	3	1	3	3	3	3	4	3	4	3	3	4	3	3	3	4	3
2	2	2503	62	1	4	2	1	3	2	0	0	0	1	0	0	1	1	48	147	22.213	1	1	90	4	5	4	4	4	4	4	4	5	4	5	4	4	4	4	4	4	4	4	4	4	3	4	4	3	4
2	2	2503	62	1	2	2	6	3	2	0	0	0	1	0	0	1	2	63	150	28	1	1	103	4	5	2	4	3	2	4	4	5	4	5	4	4	4	4	4	2	5	4	4	4	3	3	4	3	4
2	1	2503	62	1	2	2	1	4	2	0	0	0	1	0	0	1	1	64	159	25.3155	1	1	90	5	5	3	5	3	5	4	4	5	4	4	4	3	4	5	5	4	5	3	5	5	5	5	5	3	3
2	1	2503	62	1	2	4	1	6	2	0	0	0	1	0	0	1	1	80	173	26.7299	1	1	92	4	3	3	4	4	4	4	4	3	4	4	3	4	4	4	4	3	4	4	4	4	5	4	5	3	4
2	1	2503	62	1	2	2	1	6	2	0	0	0	1	0	0	1	1	65	160	25.3906	1	5	91	3	3	4	1	5	4	4	4	3	4	3	4	4	4	4	4	2	4	4	3	4	4	1	4	3	4
2	2	2503	62	1	2	2	1	3	2	0	0	0	1	0	0	1	1	70	155	29.1363	1	1	103	3	3	3	4	4	4	3	3	3	3	2	3	3	3	4	4	3	4	4	4	4	3	3	5	3	3
2	1	2503	62	1	2	2	1	10	2	0	0	0	1	0	1	1	1	75	175	24.4898	5	1	86	5	3	4	3	5	5	5	4	3	5	3	4	4	5	5	5	3	5	4	5	5	5	5	5	5	5
2	2	2503	62	1	2	2	1	7	2	0	0	0	1	0	0	1	1	46	153	19.6506	1	1	83	4	5	3	4	4	4	4	4	5	4	5	3	3	3	4	3	3	3	4	3	4	3	3	3	3	3
2	1	2502	63	1	1	2	1	2	2	0	1	0	1	0	0	1	1	35	155	14.5682	1	1	65	2	5	2	5	5	5	5	5	4	5	3	5	5	5	5	5	4	5	5	4	4	1	1	1	3	5
2	2	2502	63	1	1	1	1	10	2	0	0	0	1	0	0	1	1	54	159	21.3599	1	1	97	3	5	3	3	3	3	3	3	4	4	3	3	3	3	3	3	3	3	3	4	4	3	4	4	2	3
2	2	2502	63	1	2	2	1	15	2	0	1	0	1	0	0	1	1	64	150	28.4444	1	1	97	3	4	3	2	3	3	3	4	2	3	3	3	4	4	4	4	3	4	4	4	4	4	4	4	3	3
2	2	2502	63	1	2	2	1	5	2	0	0	0	1	0	0	1	1	40	148	18.2615	1	1	84	3	5	3	4	3	3	4	5	5	2	4	3	4	4	3	3	3	3	4	3	3	2	4	3	3	3
2	2	2502	63	1	1	2	1	20	2	0	0	0	1	0	0	1	1	61	165	22.4059	1	1	83	4	3	3	4	3	3	4	5	4	3	2	3	3	4	4	4	4	4	4	3	3	4	4	4	2	3
2	1	2501	64	1	2	2	1	4	2	0	0	0	1	0	0	1	1	85	170	29.4118	1	2	105	1	3	2	4	3	3	3	3	3	4	3	3	3	3	4	4	4	3	3	3	3	4	4	4	3	4
2	2	2501	64	1	4	2	1	15	2	0	1	0	1	0	0	1	1	60	156	24.6548	1	1	89	5	4	3	3	3	4	4	4	2	4	3	4	4	3	4	4	4	3	3	1	3	4	1	4	1	4
2	1	2501	64	1	2	2	1	20	2	0	0	0	1	0	0	1	1	63	160	24.6094	1	1	84	5	5	3	5	5	5	5	5	5	4	5	5	4	3	4	5	5	3	4	5	3	3	4	5	3	3
2	2	2501	64	1	2	2	1	5	2	0	0	0	1	0	0	1	1	72	150	32	1	1	97	4	4	4	4	3	4	4	4	3	4	4	4	4	4	4	3	4	4	4	4	4	4	4	4	3	4
2	2	2500	65	1	4	3	1	7	2	0	0	0	1	0	0	1	1	64	150	28.4444	1	1	94	3	4	3	5	4	4	4	4	3	3	4	4	3	3	4	4	3	4	3	5	4	4	4	5	2	3
2	1	2500	65	2	2	2	3	5	2	0	0	0	1	0	0	1	1	70	170	24.2215	1	1	86	4	4	4	4	4	4	4	4	3	4	2	3	4	4	3	4	4	3	5	4	4	4	4	4	3	3
2	1	2500	65	1	2	2	1	10	2	0	0	0	1	0	0	1	1	61	170	21.1073	1	1	82	3	5	3	4	4	4	4	3	5	3	4	3	3	3	4	4	4	3	3	4	4	4	4	4	3	4
2	2	2500	65	1	2	2	1	20	2	0	0	0	1	0	0	1	1	63	168	22.3214	1	1	100	3	4	2	2	3	3	3	3	4	3	4	3	3	3	3	3	3	4	3	3	3	3	3	3	3	3
2	2	2500	65	1	4	2	1	10	2	0	0	0	1	0	0	1	1	44	155	18.3143	1	1	85	4	5	3	4	4	4	4	4	5	4	5	3	3	4	4	4	3	4	4	3	3	3	3	3	3	3
2	2	2500	65	2	2	2	1	23	2	0	0	0	1	0	0	1	1	55	160	21.4844	1	5	78	2	5	4	2	4	2	5	5	4	3	4	3	4	4	4	4	3	4	5	4	4	4	4	5	3	5
2	2	2499	66	1	2	2	1	19	2	0	0	0	1	0	1	1	1	50	154	21.0828	1	1	91	3	3	3	4	3	4	3	4	5	3	3	4	4	4	3	4	3	4	4	3	4	4	4	4	3	4
2	2	2499	66	1	2	2	1	19	2	1	0	0	1	0	0	1	1	52	156	21.3675	1	1	85	3	5	4	5	4	3	4	5	5	5	4	5	4	4	4	4	5	5	5	3	4	5	4	5	3	3
2	2	2499	66	1	4	2	3	20	2	0	0	0	1	0	0	1	1	88	160	34.375	1	3	105	4	5	4	5	4	4	4	4	1	4	5	4	4	4	4	4	3	5	4	4	4	4	4	4	5	3
2	1	2499	66	1	2	2	1	36	2	0	0	0	1	0	0	1	1	78	170	26.9896	3	3	102	4	3	4	4	4	4	4	4	4	4	2	4	4	4	4	4	4	4	4	4	4	4	3	4	2	1
2	1	2498	67	1	2	2	1	7	2	0	0	0	1	0	0	1	1	74	170	25.6055	1	1	103	5	5	5	5	5	5	5	4	5	5	3	5	5	5	5	5	3	5	4	4	5	5	5	5	4	5
2	1	2498	67	1	2	2	1	4	2	0	0	0	1	0	0	1	1	65	166	23.5883	1	1	92	4	3	3	5	5	3	5	4	3	4	2	4	4	4	4	4	4	5	4	4	4	2	4	3	4	3
2	1	2498	67	1	4	2	2	15	2	0	0	0	1	0	0	1	1	73	175	23.8367	2	5	100	3	3	4	5	5	4	4	4	4	4	4	5	5	5	4	4	3	4	4	4	4	4	4	4	4	3
2	1	2498	67	1	2	4	1	2	2	0	0	0	1	0	0	1	1	64	165	23.5078	1	1	88	4	3	1	5	5	5	5	5	5	1	4	5	5	5	5	5	4	4	5	5	4	4	4	4	4	4
2	1	2498	67	1	2	2	1	10	2	0	0	0	1	0	0	1	1	69	172	23.3234	3	3	89	3	3	4	4	4	4	3	3	5	4	4	4	4	4	4	4	3	4	4	3	3	4	3	4	3	3
2	2	2498	67	1	2	1	1	6	2	0	0	0	1	0	0	1	1	60	150	26.6667	1	1	77	3	2	4	5	5	4	4	4	3	4	4	4	4	4	4	4	4	4	4	4	4	3	4	4	3	4
2	2	2498	67	1	2	2	1	16	2	0	0	0	1	0	0	1	1	66	155	27.4714	1	5	98	2	5	2	4	3	4	4	4	5	4	4	4	4	4	5	5	3	5	5	4	5	4	5	5	3	5
2	1	2497	68	1	2	2	1	5	2	0	0	0	1	0	0	1	1	67	167	24.0238	3	1	75	4	2	3	4	4	4	4	4	4	4	3	3	4	4	4	4	4	4	4	4	3	3	4	4	4	3
2	1	2497	68	1	2	2	1	2	2	0	0	0	1	0	0	1	1	63	160	24.6094	1	1	98	3	5	3	3	3	3	3	3	5	3	2	3	3	3	3	3	3	3	3	4	4	4	4	4	4	3
2	2	2497	68	1	2	2	1	50	2	0	0	0	1	0	0	1	1	50	155	20.8117	1	1	83	3	2	3	4	3	3	3	3	2	3	2	4	4	3	3	3	3	4	3	4	4	4	4	3	3	3
2	2	2497	68	1	2	2	1	4	2	0	0	0	1	0	0	1	1	62	150	27.5556	1	1	89	3	3	3	4	3	3	4	4	4	3	3	3	4	4	3	4	3	4	2	2	4	3	3	3	4	3
2	2	2496	69	1	2	2	1	17	2	0	1	0	0	0	1	1	1	50	140	25.5102	1	1	95	3	5	3	4	5	5	5	5	3	4	4	4	4	4	4	3	3	4	4	4	4	3	4	4	1	3
2	2	2496	69	1	2	2	6	6	2	0	0	0	1	0	1	1	1	49	140	25	1	5	98	4	5	4	5	4	4	4	5	5	5	5	4	4	4	4	2	3	4	4	3	4	4	5	5	1	4
2	2	2496	69	1	2	2	1	7	2	0	0	0	1	0	0	1	1	53	145	25.2081	1	1	89	3	2	5	3	5	5	5	5	2	5	2	5	5	5	5	5	4	5	5	5	5	5	5	5	1	4
2	1	2496	69	1	2	2	1	10	2	0	0	0	1	0	0	2	1	59	165	21.6713	5	1	87	4	4	4	4	4	4	4	4	4	4	4	4	4	4	4	4	3	5	4	4	4	4	4	4	4	3
2	1	2496	69	1	1	4	1	3	2	0	0	0	1	0	1	1	1	90	186	26.0146	1	1	108	3	3	3	3	3	3	3	3	5	3	3	2	4	4	3	3	1	5	4	3	3	4	4	4	4	3
2	2	2496	69	1	2	2	3	22	2	0	1	0	1	0	0	1	1	45	150	20	1	1	89	3	5	4	4	4	4	3	4	3	3	4	4	4	4	3	3	4	4	3	3	4	4	4	4	3	3
2	2	2496	69	1	2	2	3	5	2	0	0	0	1	0	0	1	1	57	155	23.7253	1	1	92	3	2	3	4	4	4	4	3	3	4	4	4	3	3	4	3	3	4	3	4	3	3	3	3	4	3
2	2	2496	69	1	4	2	1	15	2	0	0	0	1	0	0	1	1	40	140	20.4082	1	5	78	4	2	3	4	4	4	4	4	3	4	2	4	4	4	4	4	4	4	4	4	4	4	4	4	3	4
2	1	2496	69	1	5	2	2	10	2	0	0	0	1	0	0	1	1	60	160	23.4375	2	5	90	3	4	4	4	5	4	4	4	3	4	5	5	4	4	5	5	4	4	4	4	5	4	4	4	3	5
2	1	2495	70	1	2	2	2	14	2	0	0	0	1	0	1	1	1	50	165	18.3655	1	1	80	3	4	3	4	4	2	4	4	4	4	5	3	2	4	4	4	3	4	4	4	4	4	5	5	2	3
2	1	2495	70	1	2	2	1	10	2	0	0	0	1	0	0	2	1	72	165	26.4463	2	5	80	3	3	3	2	2	2	3	4	3	3	2	3	3	3	3	4	3	3	3	3	4	4	4	3	3	3
2	2	2495	70	1	4	2	1	13	2	0	0	0	1	0	0	1	1	48	154	20.2395	1	1	71	3	5	3	4	4	4	4	4	2	4	4	4	4	4	4	4	3	4	4	4	4	3	3	4	3	4
2	2	2495	70	1	2	2	1	17	2	0	0	0	1	0	0	1	1	68	153	29.0487	1	1	89	1	4	3	5	4	4	3	5	3	4	4	4	4	5	4	4	3	5	4	4	4	3	4	2	3	4
2	2	2495	70	1	2	2	1	4	2	0	0	0	1	0	1	1	1	54	145	25.6837	1	1	98	3	2	3	4	3	3	3	3	2	4	3	3	3	3	3	4	3	4	4	4	3	3	4	4	4	4
2	2	2495	70	1	4	2	2	20	2	0	0	0	1	0	0	1	1	51	155	21.2279	1	1	78	4	3	4	4	4	4	4	4	2	4	2	4	3	3	4	4	3	4	1	4	4	4	4	4	3	3
2	2	2495	70	1	4	2	6	20	2	0	0	0	1	0	0	1	1	53	155	22.0604	1	1	99	4	2	2	4	4	4	4	4	3	3	3	4	4	4	4	4	4	4	3	4	4	4	4	3	1	4
2	2	2495	70	1	4	3	1	33	2	0	0	0	1	0	0	1	1	73	162	27.8159	1	1	104	4	5	4	4	3	4	4	4	3	4	4	4	4	4	4	4	3	4	4	3	4	3	4	4	2	4
2	2	2495	70	2	4	2	7	10	2	0	0	0	1	0	0	1	1	59	146	27.6787	1	1	89	4	3	4	4	4	3	4	4	5	4	3	3	4	4	4	4	3	4	4	4	4	4	4	4	3	3
2	1	2495	70	1	2	2	1	7	2	0	0	0	1	0	0	1	1	54	160	21.0937	1	1	79	3	3	4	4	4	4	4	4	4	4	5	4	4	4	4	4	4	5	4	4	4	4	4	4	4	4
2	1	2495	70	1	4	2	1	1	2	0	0	0	1	0	0	1	1	55	163	20.7008	1	1	80	3	2	3	4	3	3	3	3	3	3	3	3	3	3	3	3	3	3	3	3	2	2	3	2	3	2
2	1	2495	70	1	2	2	2	10	2	0	0	0	1	0	0	1	1	55	160	21.4844	1	1	75	4	4	4	4	4	4	4	4	4	4	5	4	4	4	4	4	3	4	4	4	4	4	4	4	4	4
2	2	2495	70	1	4	2	1	6	2	0	0	0	1	0	0	1	1	43	150	19.1111	1	1	78	3	3	3	4	4	3	3	3	5	3	5	3	4	4	3	3	3	3	3	4	3	4	4	4	3	3
2	2	2495	70	1	1	2	1	7	2	0	0	0	1	0	0	1	1	55	150	24.4444	1	1	85	4	4	4	5	4	4	5	5	3	4	2	4	4	5	4	4	2	4	5	4	5	5	5	5	2	5
2	2	2495	70	1	2	2	3	7	2	0	0	0	1	0	0	1	1	65	150	28.8889	1	1	98	3	5	4	4	4	4	4	4	1	4	5	4	1	1	4	4	4	4	5	4	4	4	4	4	4	5
2	2	2495	70	1	2	2	1	24	2	0	0	0	1	0	0	1	1	43	149	19.3685	1	1	76	4	5	3	5	5	3	5	4	5	3	5	5	5	5	3	5	3	5	4	5	5	5	5	4	3	3
2	2	2495	70	1	4	2	6	10	2	0	0	0	1	0	1	1	1	70	150	31.1111	1	1	106	4	2	2	2	5	3	4	5	2	5	2	5	5	5	3	5	3	5	5	5	5	5	4	4	3	5
2	1	2494	71	1	2	2	1	10	2	0	0	0	1	0	0	2	1	50	160	19.5312	2	5	84	3	4	3	2	3	3	3	4	3	3	4	3	3	3	3	4	3	3	3	3	4	4	4	3	3	3
2	2	2494	71	1	4	2	1	13	2	0	0	0	1	0	0	1	1	48	145	22.83	1	1	100	5	5	4	5	5	5	5	5	5	4	5	4	4	4	4	3	2	4	4	4	3	4	5	4	3	4
2	1	2494	71	1	1	2	1	3	2	0	0	0	1	0	0	1	1	44	145	20.9275	1	1	77	4	5	4	5	5	5	4	4	5	4	5	5	5	5	5	5	5	5	4	2	5	5	5	5	1	5
2	2	2494	71	2	2	2	6	10	2	0	0	0	1	0	1	1	1	75	156	30.8185	1	2	112	4	2	2	4	4	4	4	4	2	3	2	4	4	4	4	4	4	4	3	4	4	4	4	3	1	4
2	2	2494	71	1	3	2	1	20	2	0	0	1	1	0	0	1	1	53	140	27.0408	1	1	99	3	3	4	4	4	4	4	3	5	4	3	4	4	3	3	4	3	3	3	4	4	4	4	4	3	4
2	1	2494	71	1	2	2	1	5	2	0	0	0	1	0	0	1	1	62	158	24.8358	1	1	89	4	4	4	4	4	4	4	4	2	3	2	3	4	4	4	4	3	5	4	4	4	4	4	4	3	4
2	2	2494	71	1	2	2	1	4	2	0	0	0	1	0	0	1	1	56	151	24.5603	1	1	94	3	4	3	5	3	3	3	3	4	4	3	4	4	4	4	4	3	5	4	4	4	3	3	3	4	4
2	1	2494	71	1	2	2	1	4	2	0	0	0	1	0	0	1	1	60	154	25.2994	3	3	72	4	3	3	4	4	4	4	4	4	4	3	4	3	3	4	4	4	4	4	4	4	3	4	3	3	4
2	2	2494	71	1	4	6	4	6	2	0	0	0	1	0	0	1	1	61	160	23.8281	1	1	90	4	3	4	5	5	5	5	5	2	4	5	5	5	4	5	5	4	5	5	5	5	5	5	5	2	5
2	1	2493	72	1	4	2	1	7	2	0	0	0	1	0	0	1	1	60	160	23.4375	3	1	89	4	1	3	3	4	2	4	4	5	4	3	2	5	4	3	4	5	4	4	4	4	4	4	5	3	4
2	2	2493	72	1	2	2	7	10	2	0	0	0	1	0	0	1	1	59	150	26.2222	1	1	93	4	4	3	5	5	4	4	4	4	2	5	2	3	3	3	4	4	3	3	3	3	3	2	2	1	4
2	2	2493	72	1	2	2	3	8	2	0	0	0	1	0	0	1	2	60	148	27.3923	1	1	96	4	2	4	5	4	4	5	5	5	4	3	5	5	5	5	5	3	5	5	4	5	5	4	5	3	4
2	1	2493	72	1	4	2	1	10	2	0	0	0	1	0	0	1	1	50	160	19.5312	1	1	80	4	5	4	4	4	4	4	4	4	4	4	4	4	2	4	4	3	4	5	4	4	4	4	4	4	4
2	2	2493	72	1	2	2	1	4	2	0	0	0	1	0	0	1	1	53	150	23.5556	1	1	97	4	4	2	2	4	3	3	3	4	3	4	3	3	4	4	3	3	4	4	3	3	3	3	3	3	3
2	2	2492	73	1	4	2	3	2	2	0	0	0	1	0	0	1	1	65	150	28.8889	1	1	96	5	2	1	5	4	3	4	4	1	2	2	4	3	2	3	4	4	3	3	1	3	4	1	3	1	4
2	2	2492	73	1	4	2	1	2	2	0	0	0	1	0	0	1	1	55	159	21.7555	1	1	98	4	2	4	5	4	4	5	5	5	4	3	5	5	5	5	5	3	5	5	4	5	5	4	5	3	4
2	2	2492	73	1	2	2	1	2	2	0	0	0	1	1	1	1	1	65	156	26.7094	1	1	100	3	3	3	4	3	3	3	3	4	4	2	3	3	3	4	3	3	3	4	4	4	3	3	3	4	4
2	2	2492	73	1	3	2	3	10	2	0	1	0	1	0	0	1	1	60	155	24.974	1	1	97	5	2	4	5	5	5	5	5	2	5	3	5	5	5	5	5	4	5	5	4	5	4	5	1	3	4
2	2	2492	73	1	4	2	1	5	2	0	0	0	1	0	0	2	1	55	150	24.4444	1	1	81	3	5	3	4	3	3	3	3	5	3	5	3	3	3	3	3	4	3	2	3	3	3	3	3	3	3
2	2	2492	73	1	2	2	1	9	2	0	0	0	1	0	0	1	1	43	145	20.4518	1	1	74	3	5	3	2	3	3	3	3	3	3	3	3	4	4	4	4	2	4	4	4	4	4	4	4	3	2
2	1	2491	74	1	2	2	1	15	2	0	0	0	1	0	1	2	1	77	173	25.7276	2	5	92	4	3	4	5	4	4	4	4	4	4	4	4	4	4	4	4	4	5	5	5	5	4	4	5	4	3
2	1	2491	74	1	2	2	1	3	2	0	0	0	1	0	1	2	1	66	165	24.2424	2	2	91	3	5	3	4	4	4	4	4	4	3	3	3	4	4	4	3	3	3	3	4	4	3	4	3	2	3
2	2	2491	74	1	2	2	2	5	2	0	0	0	1	0	1	1	1	44	155	18.3143	1	1	65	4	4	4	3	3	3	3	3	3	3	3	4	3	3	4	4	3	3	4	3	3	4	4	3	3	3
2	2	2491	74	2	3	2	1	20	2	0	0	0	1	0	0	2	1	50	150	22.2222	1	1	97	1	2	3	3	5	5	5	5	3	4	3	4	4	4	4	4	2	4	4	5	4	3	5	3	3	5
2	2	2491	74	1	2	2	1	2	2	0	0	0	1	0	0	1	1	52	150	23.1111	1	1	85	3	5	4	4	3	4	4	4	3	4	4	4	4	4	4	4	4	4	4	4	4	4	4	4	3	4
2	2	2491	74	1	4	2	6	18	2	0	0	0	1	0	0	1	1	42	149	18.9181	1	1	84	4	3	2	4	4	4	4	4	3	3	3	4	4	4	4	4	4	4	3	4	4	4	4	3	1	4
2	2	2491	74	1	2	2	1	4	2	0	0	0	1	0	0	1	1	57	156	23.4221	1	1	70	3	5	4	4	4	4	3	3	5	4	3	3	4	4	4	4	3	4	4	4	4	4	3	4	3	3
2	1	2491	74	1	2	2	1	3	2	0	0	0	1	0	0	1	1	73	163	27.4756	1	1	92	3	3	3	4	3	3	3	3	4	3	3	3	3	3	4	4	3	4	3	3	3	3	3	5	3	3
2	2	2491	74	1	4	2	1	8	2	0	0	0	1	0	0	1	1	55	152	23.8054	1	1	96	4	3	3	3	3	3	4	4	4	3	4	3	3	3	4	3	2	5	3	4	4	3	3	3	4	4
2	1	2490	75	1	2	2	1	3	2	0	0	0	1	0	0	1	1	66	175	21.551	1	1	82	4	4	4	3	4	4	4	4	4	4	5	4	4	4	4	4	5	4	4	4	4	4	4	4	4	5
2	2	2490	75	1	1	4	1	5	2	0	0	0	1	0	0	1	1	60	160	23.4375	1	1	90	5	4	3	2	5	4	3	3	2	3	5	3	4	4	3	4	4	5	5	3	4	3	3	3	4	4

## Sheet: Group 3
Group	Sex	BirthYear	Age	Religion	Maritalstatus	Educationlevel	Occupation	diagnosisYr	UD	HUD1	HUD2	HUD3	HUD4	HUD5	HUD6	Histparalysis	HistCVD	Weight	Height	BMI	Smoking	Alcohol	Circumwaist	QL1	QL2	QL3	QL4	QL5	QL6	QL7	QL8	QL9	QL10	QL11	QL12	QL13	QL14	QL15	QL16	QL17	QL18	QL19	QL20	QL21	QL22	QL23	QL24	QL25	QL26
3	2	2537	28	1	2	2	1	8	2	0	0	0	1	0	0	1	1	44	145	20.9275	1	1	75	4	4	4	2	3	4	4	4	4	3	3	3	4	4	4	4	4	5	4	4	4	4	4	4	4	3
3	2	2536	29	1	1	4	1	1	2	0	0	0	1	0	0	1	1	55	150	24.4444	1	1	81	4	4	4	4	4	4	4	4	5	4	3	4	4	4	4	4	4	4	4	4	4	4	4	4	3	4
3	2	2528	37	1	2	6	4	2	2	0	0	0	1	0	0	1	1	62	148	28.3053	1	5	113	3	4	4	4	3	4	4	4	4	4	3	4	4	4	3	4	3	4	4	3	3	3	4	4	4	3
3	2	2526	39	1	2	2	1	2	2	0	0	0	1	0	0	1	1	50	157	20.2848	1	1	74	5	4	2	5	5	5	5	5	5	5	2	5	5	5	5	5	3	5	3	5	5	5	5	5	5	5
3	2	2525	40	1	2	3	1	7	2	0	0	0	1	0	0	1	1	58	160	22.6562	1	1	89	3	3	3	4	3	3	4	5	4	4	4	4	4	4	4	5	3	4	2	3	3	4	4	4	5	3
3	2	2523	42	1	2	2	1	3	2	0	0	0	1	0	0	1	1	63	150	28	1	1	93	4	3	4	4	4	4	4	4	4	4	3	4	4	4	4	4	3	5	4	4	4	4	4	4	4	4
3	1	2522	43	1	1	3	1	5	2	0	0	0	1	0	0	1	1	53	165	19.4674	1	5	79	3	2	4	4	3	4	3	3	2	4	2	4	4	4	4	3	4	4	3	3	4	4	4	4	3	4
3	2	2522	43	1	2	4	1	1	2	0	0	0	1	0	0	1	1	74	150	32.8889	1	1	101	4	3	4	5	4	4	4	4	4	4	4	3	3	4	4	4	4	4	4	4	4	3	3	4	3	4
3	2	2522	43	1	5	2	1	3	2	0	0	0	1	0	0	2	1	55	150	24.4444	1	1	94	3	4	4	3	2	4	3	3	3	3	4	3	1	1	3	3	2	4	1	4	4	3	4	3	4	3
3	2	2519	46	2	2	6	3	1	2	0	0	0	1	0	0	1	1	43	150	19.1111	1	1	96	1	4	3	5	4	4	4	4	4	4	5	4	4	4	4	4	4	5	4	4	4	4	4	4	4	4
3	1	2518	47	1	2	6	4	1	2	0	0	0	1	0	0	1	1	70	155	29.1363	1	5	94	4	3	4	4	4	4	4	4	4	5	2	4	4	4	4	5	3	4	4	2	5	2	5	5	4	4
3	2	2518	47	2	2	2	2	15	2	0	0	0	1	0	0	1	1	64	156	26.2985	1	1	88	3	4	4	4	4	4	4	4	5	3	4	3	3	3	3	3	4	4	4	4	4	4	4	4	3	3
3	2	2518	47	1	2	2	1	4	2	0	0	0	1	0	0	1	1	46	147	21.2874	1	1	73	4	3	4	3	4	4	4	4	3	4	2	4	4	3	3	4	3	4	2	3	4	4	4	4	3	4
3	2	2518	47	1	2	4	1	1	2	0	0	0	1	0	0	1	1	58	155	24.1415	1	1	76	4	4	3	4	4	3	4	4	5	4	2	4	3	3	4	4	3	4	3	3	5	3	5	4	2	3
3	1	2518	47	1	2	2	2	10	2	0	0	0	1	0	0	1	1	62	161	23.9188	5	2	87	4	3	4	4	4	4	4	4	5	4	4	4	4	4	4	4	4	4	4	4	4	4	4	4	4	4
3	2	2517	48	1	2	4	1	11	2	0	0	0	1	0	0	1	1	60	153	25.6312	1	5	93	3	4	5	3	5	5	5	5	5	5	5	5	5	4	5	5	4	5	5	5	5	5	1	5	5	5
3	2	2517	48	1	2	2	1	3	2	0	0	0	1	0	0	1	1	50	150	22.2222	1	1	85	3	3	3	3	4	4	4	4	5	3	3	2	3	3	3	2	3	3	1	3	3	3	3	3	2	3
3	2	2517	48	1	2	3	3	7	2	0	0	0	1	0	0	1	1	62	156	25.4767	1	1	96	3	3	3	4	3	3	4	5	4	4	3	3	4	4	4	4	3	5	4	4	4	4	4	4	4	3
3	2	2517	48	1	2	4	2	2	2	0	0	0	1	0	0	1	1	95	155	39.5421	1	1	114	3	3	4	4	3	4	3	3	4	4	2	4	4	4	4	4	3	4	3	4	4	4	4	4	4	3
3	2	2517	48	1	2	2	1	3	2	0	0	0	1	0	0	1	1	62	162	23.6244	1	1	69	3	3	3	4	3	4	4	3	3	4	3	3	4	4	4	3	2	3	1	3	3	4	3	4	4	3
3	2	2516	49	1	2	2	1	1	2	0	0	0	1	0	0	1	1	70	165	25.7117	1	1	85	3	4	3	4	4	4	4	3	4	3	4	3	3	4	4	3	3	4	4	4	3	4	4	4	3	4
3	1	2516	49	1	2	4	1	2	2	0	0	0	1	0	0	1	1	72	158	28.8415	1	1	92	3	4	3	4	4	4	4	4	4	3	2	3	4	4	4	4	4	4	4	3	4	4	4	4	4	3
3	2	2516	49	1	2	4	1	3	2	0	0	0	1	0	0	2	1	82	163	30.863	1	1	90	4	5	4	4	4	4	4	4	2	4	4	4	4	4	4	4	4	4	4	4	4	4	4	4	3	4
3	1	2515	50	1	2	2	1	1	2	0	0	0	1	0	0	1	1	45	168	15.9439	3	5	90	4	2	4	4	4	4	4	4	2	3	2	4	4	4	4	5	4	4	4	4	4	4	5	5	3	5
3	2	2515	50	1	2	2	1	2	2	0	0	0	1	0	0	1	1	62	148	28.3053	1	1	100	3	4	4	4	3	3	4	4	4	4	2	4	4	4	5	5	4	4	4	3	4	4	4	4	4	3
3	2	2515	50	1	2	2	1	2	2	0	0	0	1	0	0	2	1	63	165	23.1405	1	1	92	3	4	3	4	4	4	4	3	4	4	2	4	4	4	4	4	4	4	3	4	4	4	4	4	5	4
3	2	2515	50	1	2	2	1	14	2	0	0	0	1	0	0	1	1	45	150	20	1	1	78	3	3	3	3	3	4	4	4	5	3	4	3	3	3	4	4	3	4	4	3	4	4	4	4	4	3
3	1	2515	50	1	2	4	1	2	2	0	0	0	1	0	0	1	1	80	169	28.0102	5	5	101	3	2	3	3	3	3	3	3	2	3	4	4	4	3	4	4	3	4	4	4	4	4	4	4	5	4
3	2	2515	50	1	2	2	1	2	2	0	0	0	1	0	0	1	1	57	157	23.1247	1	1	86	3	3	2	4	3	3	4	4	4	3	4	3	3	3	3	3	3	4	3	3	3	3	3	3	3	3
3	2	2514	51	1	2	2	2	3	2	0	0	0	1	0	0	2	2	70	155	29.1363	1	1	89	3	4	5	2	4	5	5	5	4	5	4	5	5	5	5	5	3	5	5	4	5	5	5	5	5	5
3	2	2514	51	1	2	2	1	4	2	0	0	0	1	0	0	1	1	57	160	22.2656	1	1	98	5	3	5	3	4	5	5	5	3	5	3	5	5	3	5	5	3	5	5	3	3	5	5	5	5	5
3	2	2514	51	1	2	2	1	3	2	0	0	0	1	0	0	1	1	70	150	31.1111	1	5	103	4	3	3	3	3	3	3	3	2	3	3	3	3	3	3	3	3	3	3	3	3	3	4	4	3	3
3	2	2514	51	1	2	2	1	2	2	0	0	0	1	0	0	1	1	58	150	25.7778	1	5	90	3	5	3	3	3	4	4	4	5	4	3	4	4	4	3	3	3	4	4	4	4	4	4	4	3	4
3	2	2514	51	1	2	2	7	16	2	0	0	0	1	0	0	1	1	64	162	24.3865	1	1	94	3	4	3	3	3	3	3	3	4	4	2	3	3	3	4	3	3	4	4	4	4	4	3	4	4	3
3	2	2513	52	1	4	2	1	10	2	0	0	0	1	0	0	1	1	65	154	27.4077	1	1	98	3	3	3	3	5	3	5	5	4	3	3	3	5	5	3	4	3	4	5	4	4	4	5	5	5	3
3	2	2513	52	1	2	2	1	20	2	0	0	0	1	0	0	1	1	64	154	26.986	1	1	95	3	2	3	5	5	5	5	5	4	5	2	4	5	5	5	5	4	5	3	5	5	5	5	5	5	3
3	2	2513	52	1	2	2	1	23	2	0	0	0	1	0	0	1	1	69	156	28.3531	1	1	99	3	5	3	4	3	3	3	4	2	4	3	3	4	4	4	4	3	4	3	3	3	4	3	4	4	4
3	1	2513	52	1	2	4	1	3	2	0	0	0	1	0	0	1	1	64	162	24.3865	1	5	86	4	2	4	4	4	4	4	4	3	4	3	4	4	4	4	4	4	3	4	3	3	4	4	4	3	4
3	1	2513	52	1	2	2	1	2	2	0	0	0	1	0	0	1	1	78	170	26.9896	1	1	98	3	4	3	3	3	3	4	4	3	3	1	3	4	4	4	4	3	4	3	4	4	4	4	4	4	3
3	2	2512	53	1	2	4	1	2	2	0	0	0	1	0	0	1	1	75	160	29.2969	1	1	93	3	3	4	2	4	4	4	4	4	4	2	3	4	4	4	5	3	4	4	3	4	4	4	4	3	4
3	1	2512	53	2	2	2	1	5	2	0	0	0	1	0	0	1	1	62	171	21.2031	1	1	76	4	3	4	4	4	4	4	4	3	4	3	4	4	4	4	4	4	4	4	4	4	3	3	4	3	3
3	2	2512	53	1	2	4	1	3	2	0	0	0	1	0	0	1	1	50	150	22.2222	1	1	73	3	4	3	2	3	3	5	4	3	5	3	2	4	4	4	4	3	4	4	4	4	4	4	4	4	4
3	1	2512	53	1	2	2	1	10	2	0	0	0	1	0	0	1	1	74	170	25.6055	2	5	92	3	2	4	5	4	4	4	4	4	4	2	2	4	4	4	4	4	4	4	4	4	4	4	5	4	5
3	2	2512	53	1	2	2	1	10	2	0	0	0	1	0	0	1	1	58	153	24.7768	1	1	87	3	3	3	3	5	4	4	4	3	4	2	4	4	5	4	4	4	5	5	4	4	5	4	4	4	4
3	2	2512	53	1	2	2	1	2	2	0	0	0	1	0	0	1	1	68	155	28.3039	1	1	96	3	5	3	4	4	4	4	4	5	4	2	4	4	4	4	4	4	5	4	4	4	4	4	4	4	4
3	2	2511	54	1	3	4	1	2	2	0	0	0	1	0	0	1	1	56	152	24.2382	1	1	78	3	2	4	4	3	4	3	4	1	4	1	4	4	4	4	4	2	4	4	4	3	4	4	4	3	3
3	1	2511	54	1	2	2	1	2	2	0	0	0	1	0	0	1	1	59	164	21.9363	3	3	80	3	3	2	4	4	3	4	4	3	3	3	3	4	4	4	3	4	4	4	4	4	3	4	3	3	4
3	2	2511	54	1	2	4	1	2	2	0	0	0	1	0	0	1	1	50	150	22.2222	1	1	70	3	4	4	4	4	4	4	4	5	4	3	4	4	4	4	4	3	4	4	3	4	4	4	4	4	4
3	2	2511	54	1	2	2	1	7	2	0	0	0	1	0	0	1	1	62	150	27.5556	1	1	102	3	2	3	2	4	4	4	4	5	4	5	3	3	3	3	3	3	3	4	3	4	4	4	4	4	3
3	2	2511	54	1	2	4	2	4	2	0	0	0	1	0	0	1	1	60	144	28.9352	1	1	93	3	2	4	5	4	4	4	3	3	1	4	5	4	4	4	5	3	3	3	2	5	4	3	4	1	4
3	2	2511	54	1	2	2	7	10	2	0	0	0	1	0	0	1	1	57	152	24.6711	1	1	86	4	5	4	3	4	4	4	4	5	4	2	4	4	4	4	4	4	4	4	4	4	4	4	4	4	4
3	2	2511	54	1	2	3	1	3	2	0	0	0	1	0	1	1	1	68	156	27.9421	1	1	89	2	4	4	4	3	3	2	2	4	3	4	2	3	3	3	4	3	3	3	3	3	4	4	4	3	4
3	2	2510	55	1	5	2	1	5	2	0	0	0	1	0	0	1	1	47	150	20.8889	1	1	87	4	1	5	4	4	4	4	4	2	4	2	4	4	3	4	4	2	2	4	4	4	5	5	5	3	4
3	2	2510	55	1	2	2	1	30	2	0	0	0	1	0	0	1	1	65	155	27.0552	1	1	98	5	3	5	5	5	4	5	5	3	5	2	5	5	5	5	5	3	5	4	5	5	5	5	5	1	5
3	2	2510	55	2	2	2	2	2	2	0	0	0	1	0	0	1	1	58	156	23.833	1	1	76	4	5	5	5	5	5	5	5	5	5	3	5	5	5	5	5	2	5	5	4	5	5	1	5	3	5
3	1	2510	55	1	2	2	1	3	2	0	0	0	1	0	0	1	1	92	165	33.7925	5	2	117	3	3	4	1	5	4	4	4	2	4	2	4	4	4	4	4	3	4	4	4	4	4	5	4	3	4
3	1	2510	55	1	2	4	1	5	2	0	0	0	1	0	0	1	1	58	170	20.0692	1	1	78	3	5	3	4	4	3	3	3	4	3	2	3	3	3	2	3	3	3	3	4	3	3	3	5	3	3
3	2	2510	55	1	2	2	1	4	2	0	0	0	1	0	0	1	1	58	150	25.7778	1	1	86	2	4	3	3	4	4	5	5	5	4	5	4	4	4	4	4	4	4	4	2	5	4	4	4	4	4
3	2	2510	55	1	2	2	1	3	2	0	0	0	1	0	0	1	1	52	150	23.1111	1	5	95	4	3	4	5	5	4	5	5	3	5	2	5	5	5	5	5	3	5	5	5	5	5	5	5	2	2
3	2	2509	56	1	2	2	3	15	2	0	0	0	1	0	0	1	1	83	150	36.8889	2	5	115	4	2	4	4	4	4	4	4	2	4	2	4	4	4	4	4	4	4	4	4	4	4	4	4	4	4
3	2	2509	56	1	1	2	1	5	2	0	0	0	1	0	0	1	1	64	150	28.4444	1	1	91	3	3	3	3	4	2	3	4	4	2	2	4	4	3	3	4	3	4	3	2	3	3	4	4	2	4
3	2	2509	56	1	2	3	1	10	2	0	0	0	1	0	0	1	1	67	150	29.7778	1	1	91	3	3	4	3	4	4	4	4	4	4	2	3	4	4	4	4	3	4	5	4	3	3	4	3	4	4
3	2	2509	56	2	2	4	2	5	2	0	0	0	1	0	0	2	1	84	170	29.0657	5	5	84	2	4	3	3	3	3	3	3	5	3	2	3	3	2	3	3	3	4	4	4	3	4	4	4	3	4
3	1	2509	56	2	1	2	2	10	2	0	0	0	1	0	0	1	1	67	160	26.1719	5	5	101	3	4	3	3	3	3	3	3	2	2	2	3	3	3	3	3	3	3	3	2	3	4	4	4	3	4
3	2	2509	56	1	3	2	1	3	2	0	0	0	1	0	0	1	1	63	155	26.2227	1	2	88	4	3	3	3	3	3	3	4	3	3	4	3	3	3	3	3	2	4	3	3	3	3	3	3	3	3
3	2	2509	56	1	2	2	1	3	2	0	0	0	1	0	0	1	1	54	155	22.4766	1	1	88	3	5	3	4	4	4	3	3	5	4	2	4	3	3	4	3	4	4	4	4	4	4	3	4	3	4
3	2	2509	56	1	2	2	1	19	2	0	0	0	1	0	1	1	1	64	155	26.6389	1	1	91	2	5	5	3	3	5	5	4	5	3	5	4	4	4	4	4	3	5	5	5	4	5	5	5	4	3
3	2	2508	57	1	2	2	1	20	2	0	0	0	1	0	0	1	1	50	163	18.8189	5	1	73	3	2	3	1	3	3	3	4	5	4	2	3	4	4	4	3	4	4	4	4	4	4	3	4	3	3
3	1	2508	57	1	2	2	1	5	2	0	0	0	1	0	0	1	1	66	164	24.539	5	5	92	2	4	1	5	5	5	5	5	3	3	5	3	5	4	5	5	5	5	5	2	5	5	5	5	5	5
3	1	2508	57	1	2	2	1	5	2	0	0	0	1	0	0	1	1	59	168	20.9042	1	1	79	3	5	4	4	4	4	4	3	5	3	4	3	3	3	4	3	3	3	3	3	3	4	4	4	3	3
3	1	2508	57	1	2	2	1	7	2	0	0	0	1	0	0	1	1	60	163	22.5827	1	1	88	3	3	4	4	3	3	3	3	4	4	3	4	4	4	4	4	3	5	4	3	4	4	4	4	3	3
3	2	2508	57	1	2	2	1	13	2	0	0	0	1	0	0	1	1	49	150	21.7778	1	1	71	2	3	3	4	4	4	4	4	5	3	4	3	3	3	4	3	3	4	4	3	3	3	3	3	3	3
3	2	2508	57	1	2	2	1	5	2	0	0	0	1	0	0	1	1	77	155	32.0499	1	1	104	3	2	3	3	3	3	3	3	5	3	4	3	3	3	3	4	3	4	3	3	4	3	3	3	3	3
3	2	2508	57	1	2	2	1	17	2	1	0	0	1	0	0	1	1	69	162	26.2917	1	3	87	3	3	4	4	4	4	4	4	4	4	2	4	4	4	4	4	3	4	4	4	4	3	4	3	4	4
3	2	2508	57	1	2	2	1	3	2	0	0	0	1	0	0	1	1	59	150	26.2222	1	5	90	3	2	3	3	4	4	4	4	5	3	5	4	4	4	4	4	3	4	2	3	4	5	5	5	4	4
3	2	2507	58	1	2	2	1	5	2	0	0	0	1	0	0	1	1	49	150	21.7778	1	5	78	5	4	5	5	5	5	5	5	3	1	4	5	5	5	5	5	5	5	5	5	5	5	5	5	5	5
3	2	2507	58	1	2	2	1	14	2	0	0	0	1	0	1	1	1	65	162	24.7676	3	3	93	4	2	4	5	3	5	3	3	2	5	2	5	5	5	5	5	3	5	5	5	5	4	5	5	3	3
3	1	2507	58	1	2	3	1	2	2	0	0	0	1	0	0	1	1	53	160	20.7031	3	1	76	3	3	3	2	3	3	3	3	3	3	3	3	3	3	3	3	4	3	3	3	3	4	4	4	3	4
3	2	2507	58	1	2	2	1	5	2	0	0	0	1	0	0	2	1	59	149	26.5754	1	1	89	4	4	4	4	4	4	4	4	4	4	3	4	4	4	4	5	4	4	4	3	4	3	3	4	4	4
3	2	2507	58	2	2	2	7	10	2	0	0	0	1	0	0	1	1	59	145	28.0618	1	1	70	3	4	4	4	4	4	4	4	5	4	3	4	4	4	3	3	3	4	4	4	4	4	4	4	3	3
3	2	2507	58	2	1	2	3	7	2	0	0	0	1	0	0	1	1	76	156	31.2295	1	2	84	4	3	4	2	4	4	5	5	3	5	3	5	5	5	3	5	3	4	5	4	5	4	5	5	2	5
3	2	2507	58	2	1	2	2	8	2	0	0	0	1	0	0	1	1	64	160	25	1	1	76	4	3	5	3	4	5	4	4	4	5	2	5	5	5	5	5	4	5	5	4	5	5	5	5	2	5
3	1	2507	58	1	2	2	1	4	2	0	0	0	1	0	0	1	1	73	162	27.8159	3	5	92	4	2	4	5	4	4	4	4	3	4	2	4	4	4	3	4	4	4	4	4	4	4	5	5	4	4
3	2	2507	58	1	2	2	1	3	2	0	0	0	1	0	0	1	1	65	155	27.0552	1	1	88	4	2	3	4	4	4	4	4	5	4	3	4	3	3	4	4	3	4	4	4	4	4	4	4	4	3
3	2	2507	58	1	2	2	1	15	2	0	1	0	1	0	1	1	1	62	156	25.4767	1	5	87	4	3	3	5	5	4	3	5	4	5	3	4	3	3	5	4	3	5	5	4	5	5	5	4	4	5
3	1	2506	59	1	2	3	1	4	2	0	0	0	1	0	0	1	1	60	155	24.974	3	3	87	4	4	3	4	4	4	4	4	3	4	4	4	4	4	4	4	3	4	4	4	4	4	4	4	4	3
3	2	2506	59	1	2	2	1	25	2	1	1	0	1	0	0	2	2	64	155	26.6389	1	3	97	3	4	4	3	5	3	4	3	5	4	4	3	3	4	4	3	3	3	3	4	3	4	4	4	1	4
3	2	2506	59	1	2	2	1	6	2	0	0	0	1	0	1	2	1	73	149	32.8814	1	1	102	3	4	4	4	4	4	4	4	5	4	4	4	4	4	3	3	2	4	4	4	4	4	4	4	4	2
3	2	2506	59	2	2	3	6	20	2	0	0	0	1	0	0	2	1	52	157	21.0962	3	3	73	4	4	5	5	5	5	5	5	5	4	2	5	5	4	5	5	4	4	5	4	5	5	5	5	3	5
3	2	2506	59	1	2	2	1	10	2	0	0	0	1	0	0	1	1	58	167	20.7967	1	1	79	3	4	3	4	3	4	4	5	4	3	5	3	5	3	3	4	5	4	5	5	5	5	5	5	3	5
3	2	2506	59	1	2	2	1	10	2	0	0	0	1	0	0	1	1	49	150	21.7778	1	1	83	4	3	4	4	5	4	4	4	5	4	4	4	4	4	4	4	4	4	4	3	5	4	5	4	3	5
3	2	2506	59	1	2	2	1	3	2	0	0	0	1	0	1	1	1	70	155	29.1363	1	1	97	3	3	3	4	4	4	5	4	4	4	3	4	3	4	4	4	4	5	3	4	4	2	4	2	4	3
3	2	2505	60	1	2	2	1	10	2	0	0	0	1	0	0	1	1	57	154	24.0344	1	1	91	3	3	3	3	3	4	3	4	2	4	2	4	4	4	4	4	5	5	3	3	4	3	4	5	4	3
3	2	2505	60	1	2	2	1	13	2	0	0	0	1	0	0	1	1	62	148	28.3053	1	5	85	3	3	4	3	3	4	4	4	3	3	3	4	4	4	5	4	4	4	4	4	4	4	4	4	3	3
3	2	2505	60	1	4	2	3	1	2	0	0	0	1	0	0	1	1	53	160	20.7031	1	3	98	3	3	3	5	3	4	4	4	3	4	2	3	3	3	4	4	4	3	1	3	3	3	4	3	3	3
3	2	2505	60	1	2	2	1	3	2	0	0	0	1	0	1	1	1	60	150	26.6667	1	1	92	3	3	3	3	3	4	5	5	4	3	1	3	5	5	3	3	3	4	5	3	3	5	3	5	3	3
3	2	2504	61	1	1	2	1	5	2	0	0	0	1	0	0	1	1	50	153	21.3593	1	1	86	4	2	1	5	5	5	4	4	2	3	3	3	3	3	3	3	3	3	3	3	3	3	2	4	4	4
3	2	2504	61	1	2	2	1	6	2	0	0	0	1	0	0	1	1	60	161	23.1473	1	1	92	3	4	4	4	4	4	5	4	3	4	2	4	3	3	4	4	4	4	3	4	4	4	4	4	3	4
3	2	2504	61	1	2	2	1	5	2	0	0	0	1	0	0	1	1	85	165	31.2213	1	3	107	4	2	4	5	5	5	5	5	5	5	2	5	5	5	5	5	4	5	5	5	5	5	5	5	5	4
3	1	2504	61	2	2	2	3	10	2	0	0	0	1	0	1	1	1	65	167	23.3067	1	2	80	5	5	5	4	4	4	4	4	2	4	2	5	4	4	4	4	4	5	5	3	4	5	5	4	4	4
3	1	2504	61	1	2	3	1	2	2	0	0	0	1	0	0	1	1	56	165	20.5693	5	5	86	4	5	5	5	5	5	5	5	3	5	1	5	5	5	5	5	5	5	4	4	5	5	1	5	5	5
3	1	2504	61	1	2	4	1	7	2	0	0	0	1	0	0	1	1	67	160	26.1719	1	1	90	3	4	3	4	3	3	3	4	5	4	4	3	4	4	3	3	2	4	3	3	3	3	4	4	3	3
3	2	2504	61	1	1	2	1	3	2	0	0	0	1	0	0	1	1	36	140	18.3673	1	1	62	2	2	4	4	4	4	5	5	4	4	2	4	4	4	4	4	4	4	5	5	5	5	5	5	3	4
3	1	2504	61	1	2	4	1	6	2	0	0	0	1	0	0	1	1	92	175	30.0408	1	1	105	4	4	4	4	4	4	4	4	5	4	4	4	4	4	4	4	4	5	4	4	4	4	4	4	4	4
3	1	2504	61	1	2	2	1	15	2	0	0	0	1	0	0	1	1	61	158	24.4352	5	1	88	3	4	3	4	3	3	3	4	5	3	3	3	3	3	3	4	3	4	3	3	4	3	3	3	3	3
3	2	2503	62	1	4	2	1	13	2	0	0	0	1	0	0	1	1	60	155	24.974	1	1	103	3	3	4	3	3	3	3	5	2	4	2	4	4	5	4	4	3	5	3	5	3	5	5	5	4	5
3	2	2503	62	1	5	2	1	3	2	1	0	0	1	0	0	1	1	62	158	24.8358	1	1	97	4	4	4	3	4	4	5	5	3	5	2	4	4	5	3	3	3	4	5	4	4	3	4	5	1	4
3	2	2503	62	1	2	2	1	13	2	0	0	0	1	0	0	1	1	63	152	27.268	1	1	89	4	2	4	4	4	4	4	4	3	4	2	4	4	4	4	4	3	4	4	4	3	4	4	4	3	4
3	2	2503	62	1	4	2	1	16	2	0	0	0	1	0	0	1	1	58	155	24.1415	1	1	90	3	3	3	5	3	3	3	2	3	4	2	3	2	3	3	4	3	4	3	3	5	4	4	4	3	3
3	1	2503	62	1	2	2	1	3	2	0	0	0	1	0	0	2	1	63	160	24.6094	2	5	91	2	3	3	3	3	3	3	3	2	3	3	3	3	3	3	3	3	2	3	3	3	3	3	4	3	2
3	1	2503	62	1	2	2	1	2	2	0	0	0	1	0	0	1	1	70	170	24.2215	5	3	92	2	2	3	4	3	3	4	4	4	3	4	4	4	4	4	4	4	4	2	3	3	4	4	4	3	4
3	2	2503	62	2	2	2	1	7	2	1	0	0	1	0	0	1	1	58	150	25.7778	1	1	76	3	3	3	2	4	4	4	4	2	4	2	3	3	3	3	3	3	4	4	4	4	4	4	4	3	3
3	1	2503	62	1	2	2	1	3	2	0	0	0	1	0	0	1	1	61	172	20.6193	1	3	83	4	3	4	4	4	4	4	4	3	4	2	4	4	4	4	4	3	4	3	4	4	4	4	4	3	4
3	2	2503	62	1	2	2	1	7	2	0	0	0	1	0	0	1	1	54	140	27.551	1	1	72	4	2	4	4	4	4	4	3	5	3	3	3	3	4	4	4	4	4	4	4	4	4	4	4	3	4
3	2	2503	62	1	4	2	1	10	2	0	0	0	1	0	0	1	1	50	165	18.3655	1	1	77	4	3	3	4	4	4	4	4	3	3	5	4	4	4	3	3	3	3	4	4	4	3	3	3	3	3
3	2	2502	63	1	4	2	1	15	2	0	0	0	1	0	0	2	1	60	160	23.4375	1	1	102	3	2	4	4	3	3	3	4	3	4	2	4	3	3	3	3	3	3	4	3	3	3	4	4	4	4
3	2	2502	63	1	2	2	1	10	2	0	0	0	1	0	0	1	1	46	153	19.6506	1	1	84	1	3	4	2	5	5	5	5	1	4	2	4	5	5	5	5	5	5	5	4	5	2	5	2	3	3
3	1	2502	63	1	2	2	1	2	2	0	0	0	1	0	0	1	1	60	157	24.3418	2	5	86	3	3	2	3	3	3	3	3	4	3	4	3	3	3	3	3	3	3	3	3	3	3	3	3	3	3
3	2	2502	63	1	2	2	1	20	2	0	0	0	1	0	0	1	1	52	155	21.6441	1	1	92	4	3	3	4	4	4	4	4	3	3	3	3	4	4	4	4	3	3	3	4	4	4	4	4	3	4
3	2	2502	63	1	2	2	1	20	2	0	0	0	1	0	0	1	1	54	155	22.4766	1	1	88	4	2	4	4	4	4	4	4	4	4	4	4	4	4	4	4	3	4	4	4	4	4	4	4	4	3
3	2	2502	63	1	2	2	1	4	2	0	0	0	1	0	0	1	1	61	172	20.6193	5	1	87	3	3	3	3	3	3	3	2	4	3	3	2	4	4	3	4	4	4	4	4	4	4	4	4	3	4
3	2	2501	64	2	2	2	2	6	2	0	0	0	1	0	0	1	1	64	155	26.6389	1	1	84	2	4	3	3	5	3	3	3	3	4	3	3	3	3	4	4	2	4	2	4	4	4	4	4	3	3
3	1	2501	64	1	2	2	1	11	2	0	0	0	1	0	0	1	1	60	160	23.4375	1	5	90	3	1	5	4	5	5	4	4	4	5	4	5	5	5	5	4	3	5	5	2	5	5	5	5	5	5
3	1	2500	65	1	2	4	1	5	2	0	0	0	1	0	0	1	1	73	165	26.8136	3	2	72	1	4	1	2	2	2	2	3	3	3	3	2	2	2	4	4	4	4	4	4	4	1	2	2	2	3
3	2	2500	65	1	2	2	1	15	2	0	0	0	1	0	0	2	1	69	150	30.6667	1	1	117	3	4	4	3	3	3	3	3	4	4	3	3	3	3	4	4	4	4	3	3	3	3	4	4	4	4
3	2	2500	65	1	4	2	1	3	2	0	0	0	1	0	0	1	1	62	155	25.8065	1	1	91	3	2	5	5	3	5	3	5	3	5	3	5	5	4	4	4	2	5	4	4	5	5	3	5	2	3
3	1	2500	65	1	4	2	1	10	2	0	0	0	1	0	0	1	1	60	173	20.0474	1	5	72	5	3	5	5	5	5	4	4	3	5	3	5	4	4	4	4	4	4	4	5	5	5	4	5	5	4
3	2	2500	65	2	4	3	3	13	2	0	0	0	1	0	0	1	1	44	150	19.5556	1	1	87	4	4	4	4	4	4	4	4	5	3	4	3	3	2	4	4	4	4	4	4	4	4	5	5	3	3
3	2	2500	65	1	4	2	6	17	2	0	0	0	1	0	0	1	1	59	159	23.3377	1	1	90	3	3	4	5	3	5	5	5	3	5	3	5	5	5	5	5	4	5	5	4	3	5	5	5	3	5
3	2	2499	66	1	3	2	1	30	2	0	0	0	1	0	0	1	1	51	150	22.6667	5	5	84	1	5	5	5	5	5	5	1	2	5	2	5	5	5	5	5	2	5	5	5	5	5	5	5	1	4
3	2	2499	66	1	2	2	1	19	2	0	1	0	1	0	0	1	1	62	160	24.2187	1	1	97	3	2	3	4	3	3	3	3	2	3	2	3	4	4	4	4	3	4	3	4	4	3	4	3	4	3
3	1	2499	66	1	1	2	1	7	2	0	0	0	1	0	0	1	1	82	159	32.4354	1	1	111	2	2	4	5	4	5	4	3	3	2	2	3	3	2	3	4	3	2	2	3	2	2	2	2	1	1
3	1	2499	66	1	2	2	1	15	2	0	0	0	1	0	0	1	1	60	165	22.0386	5	5	83	4	1	4	5	5	4	4	4	3	4	2	4	4	4	3	3	3	3	4	4	4	4	4	4	4	3
3	2	2499	66	1	4	2	1	10	2	0	0	0	1	0	0	1	1	68	160	26.5625	1	1	102	4	2	5	5	5	5	5	5	4	5	3	5	5	5	5	5	4	5	4	4	5	5	5	5	3	4
3	2	2499	66	1	4	2	1	10	2	0	0	0	1	0	0	1	1	67	157	27.1816	1	1	112	3	1	3	3	4	2	4	5	2	4	2	3	4	4	4	4	2	4	4	4	4	3	4	4	2	4
3	2	2499	66	1	3	2	1	16	2	0	0	0	1	0	0	1	1	63	140	32.1429	1	1	108	3	1	3	3	3	3	4	4	4	4	1	3	3	3	3	3	4	4	3	3	3	4	4	4	3	4
3	2	2499	66	1	2	2	1	1	2	0	0	0	1	0	0	1	1	56	150	24.8889	1	1	76	3	4	3	4	3	3	3	3	3	3	4	3	3	4	4	4	3	4	4	4	4	4	3	4	3	3
3	2	2499	66	1	2	2	1	24	2	0	0	0	1	0	0	1	1	63	150	28	1	1	97	3	3	3	3	3	3	4	4	2	3	2	3	3	3	3	3	3	2	2	3	3	2	2	2	3	3
3	2	2499	66	1	2	2	1	4	2	0	0	0	1	0	0	1	1	45	145	21.4031	1	5	80	3	5	5	5	5	5	5	5	5	5	4	5	5	5	5	5	3	5	5	5	5	5	5	5	4	5
3	1	2498	67	1	2	2	1	9	2	0	0	1	1	0	0	1	1	60	157	24.3418	1	1	102	1	2	3	4	2	4	2	3	3	3	3	3	4	4	4	4	3	5	5	4	4	4	4	4	4	3
3	1	2498	67	1	2	2	1	1	2	0	0	0	1	0	0	1	1	42	170	14.5329	5	2	72	3	3	3	3	3	3	3	3	2	3	2	3	3	3	4	4	4	4	4	4	4	4	3	4	3	3
3	1	2498	67	1	2	2	1	5	2	0	0	0	1	0	0	1	1	65	165	23.8751	5	5	81	4	3	4	4	4	4	4	4	5	4	4	4	4	4	4	4	3	4	4	4	4	4	4	4	4	3
3	1	2498	67	2	2	3	1	4	2	0	0	0	1	0	0	1	1	61	162	23.2434	1	5	82	5	3	4	5	5	5	5	5	2	5	2	5	4	1	5	5	5	5	5	4	5	5	5	5	2	5
3	2	2498	67	1	2	6	4	20	2	0	0	0	1	0	0	2	1	45	152	19.4771	1	1	69	3	5	3	2	3	3	3	3	4	3	5	3	4	4	4	4	3	4	4	3	3	4	3	3	4	4
3	2	2498	67	1	4	2	1	1	2	0	0	0	1	0	0	1	1	45	150	20	1	1	83	4	3	3	4	4	3	4	3	3	3	4	4	3	4	4	3	3	3	4	4	3	4	4	4	4	4
3	2	2498	67	1	2	6	4	13	2	0	0	0	1	0	0	1	1	70	140	35.7143	1	1	93	5	3	5	4	5	5	5	5	1	5	1	5	5	5	5	5	5	4	5	4	5	5	5	5	2	4
3	2	2498	67	1	4	2	1	17	2	0	0	0	1	0	0	1	1	49	145	23.3056	1	1	86	3	2	3	3	3	3	3	3	1	3	4	3	4	3	5	4	3	5	4	4	5	5	5	5	3	3
3	2	2498	67	1	2	2	1	10	2	0	0	0	1	0	0	1	1	53	147	24.5268	1	5	86	4	3	4	3	5	4	5	5	4	4	4	4	4	4	5	5	3	4	4	5	5	4	4	4	2	5
3	2	2498	67	1	1	2	1	10	2	0	0	0	1	0	1	1	1	52	152	22.5069	1	1	76	3	3	5	4	5	5	5	4	3	5	3	5	4	4	4	5	3	5	2	4	5	5	4	5	3	5
3	1	2497	68	1	3	2	1	20	2	0	0	0	1	0	0	1	1	64	170	22.1453	1	1	82	3	2	3	5	5	5	5	5	1	5	2	5	3	4	3	5	3	5	2	3	5	5	4	5	5	3
3	1	2497	68	1	2	2	1	3	2	0	0	0	1	0	0	1	2	72	163	27.0993	1	1	99	3	5	3	4	3	3	4	4	5	4	3	3	4	4	4	3	3	4	4	4	4	4	4	4	3	3
3	1	2497	68	1	2	6	4	11	2	0	0	0	1	0	0	1	1	64	163	24.0882	1	1	87	3	4	4	2	4	4	4	4	5	4	5	4	3	2	4	4	3	4	4	3	4	4	4	4	4	4
3	1	2496	69	1	2	2	1	12	2	0	0	0	1	0	0	1	1	70	165	25.7117	3	3	100	5	2	4	4	5	4	4	4	2	4	2	4	4	5	4	5	3	4	3	4	3	4	4	5	2	3
3	2	2496	69	1	2	2	1	5	2	0	1	0	1	0	0	1	1	56	155	23.3091	1	1	102	3	2	2	3	3	3	3	3	2	3	2	3	4	3	4	4	3	2	3	3	3	4	4	4	3	4
3	2	2496	69	1	2	2	2	1	2	0	0	0	1	0	0	1	1	53	160	20.7031	1	1	86	4	5	4	4	4	4	3	4	4	4	4	3	3	3	3	4	4	4	4	4	4	4	4	4	3	4
3	2	2496	69	1	4	2	1	1	2	0	0	0	1	0	0	1	1	49	155	20.3954	1	1	98	3	3	4	4	4	4	4	5	5	4	5	4	4	4	4	4	3	4	4	4	4	4	5	5	3	4
3	2	2496	69	1	2	6	6	7	2	0	0	0	1	0	0	2	1	67	157	27.1816	1	1	89	4	5	3	5	4	4	4	4	5	5	4	4	4	4	5	5	4	3	4	4	5	4	4	4	4	4
3	2	2495	70	1	4	2	1	13	2	0	0	0	1	0	0	1	1	63	164	23.4236	1	1	94	1	2	5	1	1	4	4	5	2	5	3	5	5	4	3	4	3	4	1	3	4	4	4	4	3	3
3	2	2495	70	1	4	2	7	29	2	0	0	0	1	0	0	1	1	54	155	22.4766	1	1	91	3	3	3	4	4	4	4	4	4	4	3	4	3	3	3	3	3	4	4	3	3	4	4	4	3	3
3	2	2495	70	1	4	2	1	5	2	0	0	0	1	0	0	1	1	35	145	16.6468	1	1	80	5	2	4	5	5	5	4	4	3	4	2	4	4	1	4	1	4	4	4	4	3	4	4	4	3	4
3	2	2495	70	1	2	2	1	10	2	0	0	0	1	0	1	1	1	50	150	22.2222	1	2	93	3	3	4	3	4	4	4	4	3	4	3	3	3	4	4	4	3	4	5	5	4	4	4	4	2	3
3	2	2495	70	1	1	2	6	4	2	0	0	0	1	0	0	1	1	53	150	23.5556	1	1	80	3	2	4	5	4	4	4	4	2	3	2	3	2	2	3	3	2	4	3	3	3	2	2	4	1	4
3	2	2495	70	1	4	4	1	15	2	0	0	0	1	0	0	1	1	55	150	24.4444	1	1	89	3	2	3	4	3	3	3	3	3	3	4	3	3	3	4	3	3	4	3	3	3	3	3	5	3	3
3	2	2495	70	1	2	2	1	5	2	0	0	0	1	0	0	1	1	52	150	23.1111	1	1	90	3	3	3	4	4	4	4	4	5	4	4	4	4	3	4	4	4	4	4	4	3	4	4	4	3	4
3	2	2495	70	1	2	2	1	7	2	0	0	0	1	0	0	1	1	40	145	19.025	1	1	80	4	4	3	3	3	4	4	3	4	4	5	4	4	4	3	3	2	4	3	3	3	4	4	4	3	3
3	2	2494	71	1	4	2	1	2	2	0	0	0	1	0	0	1	1	59	150	26.2222	1	1	94	5	2	4	3	4	4	4	4	2	4	3	4	5	3	4	5	2	4	4	3	5	2	5	5	5	3
3	2	2494	71	1	4	2	1	1	2	0	0	0	1	0	0	1	1	59	154	24.8777	1	1	91	4	3	2	5	5	4	4	5	3	4	3	4	3	3	3	3	4	3	4	2	3	3	4	3	1	4
3	2	2494	71	1	4	2	7	3	2	0	0	0	1	0	0	1	1	62	160	24.2187	1	1	101	3	3	2	3	4	4	4	4	4	3	3	1	3	4	4	1	1	1	4	3	3	3	2	4	1	5
3	1	2493	72	1	2	2	1	10	2	0	0	0	1	0	0	1	1	55	165	20.202	1	1	91	3	2	4	3	4	4	5	4	2	5	2	4	5	5	3	5	5	5	3	5	5	5	5	5	3	5
3	2	2493	72	2	4	2	1	12	2	0	0	0	1	0	0	1	1	78	152	33.7604	1	5	105	3	2	3	4	3	4	5	4	2	3	2	4	4	4	4	4	3	4	4	4	4	4	4	4	3	4
3	2	2493	72	1	4	2	4	18	2	1	0	0	1	0	0	1	1	47	149	21.1702	1	1	96	4	2	3	4	4	4	3	4	2	4	2	3	3	3	3	4	3	3	3	4	3	5	3	3	1	3
3	2	2493	72	1	2	2	1	11	2	0	0	0	1	0	0	1	1	50	150	22.2222	1	1	94	3	2	3	3	4	4	4	4	2	3	3	4	4	3	4	5	4	4	4	4	4	4	3	3	2	3
3	2	2493	72	1	2	2	3	10	2	0	0	0	1	0	1	1	1	60	150	26.6667	1	1	90	4	4	4	4	4	4	4	4	3	4	2	3	3	3	4	4	4	4	4	4	3	3	4	4	2	3
3	2	2493	72	1	4	2	1	1	2	0	0	0	1	0	0	1	1	60	156	24.6548	1	1	78	2	2	3	4	4	4	4	3	2	3	2	3	3	4	4	4	3	4	4	4	4	2	3	3	3	3
3	2	2594	72	1	4	2	1	20	2	0	0	0	1	0	0	1	1	44	150	19.5556	1	1	82	3	2	2	2	3	1	5	5	5	5	3	4	5	5	5	5	5	5	1	5	5	5	2	5	3	5
3	2	2492	73	2	2	2	1	15	2	0	0	0	1	0	0	1	1	52	150	23.1111	1	5	81	4	2	4	4	4	4	4	4	3	4	3	4	3	2	4	4	3	4	2	4	4	4	4	4	4	2
3	1	2492	73	2	2	2	1	4	2	0	0	0	1	0	0	1	1	67	167	24.0238	1	1	98	3	3	3	4	4	4	4	4	3	4	3	4	4	4	4	4	4	4	5	4	4	4	4	4	4	4
3	2	2492	73	1	2	2	1	20	2	0	0	0	1	0	0	1	1	60	150	26.6667	1	1	92	3	3	3	3	3	4	4	4	3	3	3	4	4	4	4	4	3	4	4	3	4	3	4	3	3	3
3	2	2491	74	2	2	2	1	25	2	0	0	0	1	0	0	1	1	60	145	28.5375	1	1	96	3	4	4	3	3	3	3	3	3	3	2	4	3	3	3	3	3	4	4	4	3	3	4	4	4	4
3	2	2491	74	1	4	2	1	10	2	0	0	0	1	0	0	1	2	65	157	26.3702	1	1	101	4	3	2	5	4	4	4	4	3	4	3	2	3	3	2	4	4	3	4	1	4	3	1	3	1	5
3	2	2490	75	1	2	1	1	18	2	0	0	0	1	0	0	1	1	50	150	22.2222	1	1	82	3	2	4	3	3	3	3	3	3	4	3	3	3	3	4	4	4	3	3	4	4	4	4	4	4	4
3	2	2490	75	1	4	2	1	1	2	0	0	0	1	0	0	1	1	52	156	21.3675	1	1	93	3	4	2	4	4	3	4	4	3	4	4	3	3	3	4	4	4	4	4	4	4	3	4	4	3	4
3	2	2490	75	1	4	2	7	1	2	0	0	0	1	0	0	1	1	40	150	17.7778	1	1	70	3	3	2	3	4	3	5	3	4	4	1	2	3	3	4	4	3	4	2	3	3	2	2	2	2	3

## Sheet: Group 4
Group	Sex	BirthYear	Age	Religion	Maritalstatus	Educationlevel	Occupation	diagnosisYr	UD	HUD1	HUD2	HUD3	HUD4	HUD5	HUD6	Histparalysis	HistCVD	Weight	Height	BMI	Smoking	Alcohol	Circumwaist	QL1	QL2	QL3	QL4	QL5	QL6	QL7	QL8	QL9	QL10	QL11	QL12	QL13	QL14	QL15	QL16	QL17	QL18	QL19	QL20	QL21	QL22	QL23	QL24	QL25	QL26
4	1	2537	28	1	1	4	2	#NULL!	1	#NULL!	#NULL!	#NULL!	#NULL!	#NULL!	#NULL!	1	1	62	168	21.9671	1	5	82	3	5	4	4	4	4	4	4	3	4	3	4	4	4	5	4	4	4	4	4	4	4	4	4	4	4
4	1	2536	29	1	1	4	1	#NULL!	2	0	0	0	0	0	1	1	1	92	165	33.7925	4	4	100	2	5	4	3	3	4	3	3	5	2	4	3	4	4	3	4	3	4	4	4	4	3	4	4	3	3
4	2	2529	36	1	2	2	3	#NULL!	1	#NULL!	#NULL!	#NULL!	#NULL!	#NULL!	#NULL!	1	1	64	156	26.2985	1	1	97	3	3	4	4	4	4	3	3	5	3	2	3	3	3	4	4	3	4	4	3	3	4	4	2	3	3
4	1	2527	38	1	1	3	1	#NULL!	1	#NULL!	#NULL!	#NULL!	#NULL!	#NULL!	#NULL!	1	1	58	160	22.6562	5	5	79	4	3	4	3	4	4	4	4	3	4	3	4	4	4	4	4	4	4	4	4	4	4	4	4	3	4
4	2	2526	39	1	2	2	1	#NULL!	1	#NULL!	#NULL!	#NULL!	#NULL!	#NULL!	#NULL!	1	1	53	158	21.2306	1	1	73	3	2	4	4	4	3	3	4	5	4	3	3	3	4	4	4	4	3	3	4	4	4	4	4	4	4
4	2	2525	40	1	3	2	1	#NULL!	1	#NULL!	#NULL!	#NULL!	#NULL!	#NULL!	#NULL!	1	1	89	160	34.7656	1	4	106	5	5	5	5	5	5	5	5	5	5	2	5	5	5	5	5	4	4	4	2	3	5	1	5	5	3
4	2	2525	40	1	2	3	1	#NULL!	1	#NULL!	#NULL!	#NULL!	#NULL!	#NULL!	#NULL!	1	1	70	150	31.1111	1	1	90	5	3	5	4	5	5	5	5	2	4	3	4	4	4	4	5	4	4	5	4	4	4	5	4	5	4
4	2	2522	43	1	2	4	8	#NULL!	2	0	0	0	0	0	1	1	2	70	144	33.7577	1	5	101	4	1	4	2	2	4	4	4	5	4	2	4	4	4	4	3	3	4	4	4	4	4	4	4	4	3
4	2	2522	43	1	3	4	1	#NULL!	1	#NULL!	#NULL!	#NULL!	#NULL!	#NULL!	#NULL!	1	1	58	160	22.6562	1	4	78	5	3	5	5	5	5	5	5	5	5	3	5	5	4	4	4	4	4	3	3	3	5	1	5	5	3
4	2	2521	44	1	2	4	1	#NULL!	1	#NULL!	#NULL!	#NULL!	#NULL!	#NULL!	#NULL!	1	1	85	160	33.2031	1	5	90	4	3	4	5	4	4	2	4	5	3	2	4	4	4	4	4	3	5	4	3	3	4	4	4	4	4
4	2	2521	44	1	2	2	1	#NULL!	1	#NULL!	#NULL!	#NULL!	#NULL!	#NULL!	#NULL!	1	1	65	150	28.8889	1	1	80	3	5	4	3	4	3	4	4	5	4	4	4	4	4	4	5	3	4	2	3	4	3	4	3	3	3
4	1	2521	44	1	1	6	1	#NULL!	1	#NULL!	#NULL!	#NULL!	#NULL!	#NULL!	#NULL!	1	1	70	180	21.6049	1	5	84	5	2	5	5	5	5	5	5	4	5	4	5	5	5	5	5	5	5	5	5	5	5	5	5	5	4
4	1	2521	44	1	2	3	1	#NULL!	1	#NULL!	#NULL!	#NULL!	#NULL!	#NULL!	#NULL!	1	1	54	150	24	1	1	82	4	3	4	4	4	4	4	4	4	4	3	3	4	4	4	4	3	4	2	4	4	4	4	4	3	4
4	2	2521	44	1	2	2	2	#NULL!	1	#NULL!	#NULL!	#NULL!	#NULL!	#NULL!	#NULL!	1	1	52	151	22.806	1	1	79	4	4	4	2	3	3	3	3	5	3	4	4	4	4	4	4	3	3	3	3	3	4	4	4	3	4
4	2	2520	45	1	2	2	1	#NULL!	1	#NULL!	#NULL!	#NULL!	#NULL!	#NULL!	#NULL!	1	1	50	150	22.2222	1	1	70	3	4	4	4	4	3	4	4	5	4	5	4	4	4	4	5	2	4	3	3	4	4	4	4	4	4
4	2	2520	45	1	1	4	1	#NULL!	1	#NULL!	#NULL!	#NULL!	#NULL!	#NULL!	#NULL!	1	1	57	162	21.7193	1	5	78	4	5	4	3	4	3	4	4	2	4	4	3	4	3	3	4	3	3	4	3	3	3	3	4	2	4
4	2	2520	45	1	2	4	1	#NULL!	1	#NULL!	#NULL!	#NULL!	#NULL!	#NULL!	#NULL!	1	1	58	165	21.3039	1	5	80	4	4	4	4	4	4	4	4	4	4	4	4	4	4	4	4	3	4	3	4	4	3	4	4	4	3
4	1	2520	45	1	2	3	1	#NULL!	1	#NULL!	#NULL!	#NULL!	#NULL!	#NULL!	#NULL!	1	1	55	158	22.0317	4	5	80	4	3	4	4	4	4	4	4	4	5	2	5	5	4	4	4	4	4	5	4	5	5	5	5	3	3
4	2	2519	46	1	3	6	7	#NULL!	1	#NULL!	#NULL!	#NULL!	#NULL!	#NULL!	#NULL!	1	1	64	150	28.4444	1	1	81	3	3	4	4	4	4	4	4	2	5	3	4	4	4	3	4	3	4	4	3	3	4	5	5	1	3
4	1	2519	46	1	2	6	6	#NULL!	1	#NULL!	#NULL!	#NULL!	#NULL!	#NULL!	#NULL!	1	1	50	160	19.5312	5	5	75	5	3	5	5	4	4	3	3	3	4	2	3	4	4	4	4	2	4	4	4	4	4	4	4	4	3
4	2	2519	46	1	2	3	7	#NULL!	1	#NULL!	#NULL!	#NULL!	#NULL!	#NULL!	#NULL!	1	1	66	169	23.1084	1	1	78	5	4	4	4	5	4	5	5	4	4	2	4	4	4	4	2	4	4	5	4	4	4	4	4	4	5
4	1	2518	47	1	2	2	1	#NULL!	1	#NULL!	#NULL!	#NULL!	#NULL!	#NULL!	#NULL!	1	1	69	159	27.2932	1	5	93	4	2	4	4	4	4	4	4	2	4	2	4	3	4	5	5	4	4	4	4	4	4	5	5	3	5
4	2	2518	47	1	2	5	4	#NULL!	1	#NULL!	#NULL!	#NULL!	#NULL!	#NULL!	#NULL!	1	1	45	160	17.5781	1	1	70	3	4	4	4	3	3	3	3	4	3	4	4	4	3	3	3	2	4	3	2	4	2	4	4	4	4
4	1	2518	47	1	2	4	2	#NULL!	1	#NULL!	#NULL!	#NULL!	#NULL!	#NULL!	#NULL!	1	1	58	162	22.1003	4	5	77	3	2	4	4	4	4	4	4	4	4	3	4	4	4	5	5	5	4	4	4	3	4	5	5	5	5
4	1	2518	47	1	2	2	1	#NULL!	1	#NULL!	#NULL!	#NULL!	#NULL!	#NULL!	#NULL!	1	1	65	160	25.3906	4	5	88	4	5	4	4	5	5	5	4	5	4	5	4	4	4	4	4	3	4	4	4	2	4	5	4	5	3
4	2	2518	47	1	2	2	1	#NULL!	1	#NULL!	#NULL!	#NULL!	#NULL!	#NULL!	#NULL!	1	1	65	150	28.8889	1	5	92	3	3	3	4	4	4	4	4	5	4	3	4	3	3	4	4	3	4	2	3	3	4	4	4	3	4
4	2	2517	48	1	2	4	1	#NULL!	1	#NULL!	#NULL!	#NULL!	#NULL!	#NULL!	#NULL!	1	2	65	155	27.0552	1	1	90	1	3	5	5	5	5	5	5	2	1	2	4	5	4	5	5	3	5	5	5	5	5	5	5	4	5
4	2	2517	48	1	4	5	3	#NULL!	1	#NULL!	#NULL!	#NULL!	#NULL!	#NULL!	#NULL!	1	1	48	142	23.8048	1	1	70	3	5	2	2	2	3	4	4	5	4	4	2	4	4	4	3	3	4	4	4	3	4	4	4	4	3
4	2	2517	48	1	2	4	1	#NULL!	1	#NULL!	#NULL!	#NULL!	#NULL!	#NULL!	#NULL!	1	2	69	150	30.6667	1	5	92	2	3	4	4	4	4	4	4	4	4	3	4	4	2	4	4	3	4	4	3	4	4	4	4	4	3
4	2	2517	48	1	1	4	1	#NULL!	1	#NULL!	#NULL!	#NULL!	#NULL!	#NULL!	#NULL!	1	1	52	150	23.1111	1	4	93	4	5	4	5	5	5	5	5	5	4	5	4	4	4	4	4	4	4	4	4	4	4	4	4	3	4
4	2	2516	49	1	2	2	1	#NULL!	1	#NULL!	#NULL!	#NULL!	#NULL!	#NULL!	#NULL!	1	1	68	160	26.5625	1	1	92	3	3	4	4	4	4	4	4	4	4	2	4	4	4	4	5	2	4	3	3	4	4	4	4	4	4
4	2	2516	49	1	2	2	1	#NULL!	1	#NULL!	#NULL!	#NULL!	#NULL!	#NULL!	#NULL!	1	1	53	146	24.864	1	1	80	4	3	3	3	4	3	3	3	5	3	5	3	3	4	3	3	3	3	3	3	3	3	4	4	4	3
4	1	2516	49	1	2	4	1	#NULL!	1	#NULL!	#NULL!	#NULL!	#NULL!	#NULL!	#NULL!	1	1	48	167	17.2111	1	1	78	3	5	3	4	3	3	3	3	5	3	4	3	4	3	4	4	3	5	4	3	4	5	3	4	4	3
4	2	2516	49	1	2	2	1	#NULL!	1	#NULL!	#NULL!	#NULL!	#NULL!	#NULL!	#NULL!	1	1	65	153	27.7671	1	4	88	4	3	3	4	4	4	3	3	4	4	2	4	3	3	4	4	3	3	4	3	4	3	4	3	4	3
4	2	2515	50	1	2	3	1	#NULL!	1	#NULL!	#NULL!	#NULL!	#NULL!	#NULL!	#NULL!	1	1	78	158	31.245	1	1	97	4	2	4	4	4	4	4	4	3	4	3	4	4	4	4	4	3	4	4	4	3	4	4	4	4	3
4	2	2515	50	1	2	2	1	#NULL!	1	#NULL!	#NULL!	#NULL!	#NULL!	#NULL!	#NULL!	2	1	63	160	24.6094	1	1	82	5	2	5	5	5	4	5	5	2	5	2	5	4	4	4	4	4	5	4	4	4	5	5	5	3	4
4	2	2515	50	1	2	2	1	#NULL!	1	#NULL!	#NULL!	#NULL!	#NULL!	#NULL!	#NULL!	1	1	55	145	26.1593	1	1	90	3	3	1	3	3	5	5	5	3	4	3	5	5	5	4	5	5	4	4	4	5	5	4	5	4	4
4	2	2515	50	1	2	3	1	#NULL!	1	#NULL!	#NULL!	#NULL!	#NULL!	#NULL!	#NULL!	1	1	70	153	29.903	1	5	110	4	2	4	4	4	4	4	3	2	4	2	3	4	4	4	4	3	3	3	4	4	4	4	4	4	4
4	2	2515	50	1	2	4	1	#NULL!	1	#NULL!	#NULL!	#NULL!	#NULL!	#NULL!	#NULL!	1	1	67	150	29.7778	1	1	64	4	4	3	4	4	5	4	4	5	4	4	5	4	3	4	4	3	4	3	3	4	4	4	4	4	3
4	2	2515	50	1	2	3	1	#NULL!	1	#NULL!	#NULL!	#NULL!	#NULL!	#NULL!	#NULL!	2	1	69	152	29.865	1	5	96	3	3	4	4	4	4	5	5	4	4	2	4	4	4	3	3	3	4	4	4	4	4	5	5	4	5
4	2	2515	50	1	2	2	1	#NULL!	1	#NULL!	#NULL!	#NULL!	#NULL!	#NULL!	#NULL!	1	1	82	165	30.1194	4	5	101	4	3	4	4	4	4	4	4	4	4	2	4	4	4	4	3	4	4	4	4	4	4	4	4	3	4
4	2	2515	50	1	1	3	2	#NULL!	1	#NULL!	#NULL!	#NULL!	#NULL!	#NULL!	#NULL!	2	1	74	155	30.8012	1	1	104	3	4	3	3	3	3	3	3	3	3	2	3	3	3	4	3	3	4	3	3	3	4	3	4	3	3
4	2	2514	51	1	4	2	1	#NULL!	1	#NULL!	#NULL!	#NULL!	#NULL!	#NULL!	#NULL!	2	1	46	150	20.4444	1	1	76	3	3	4	3	4	3	4	5	3	4	3	4	4	4	4	4	3	4	4	2	4	4	5	4	2	5
4	2	2514	51	1	5	2	1	#NULL!	1	#NULL!	#NULL!	#NULL!	#NULL!	#NULL!	#NULL!	1	1	46	162	17.5278	1	1	74	4	5	4	3	4	4	4	4	3	4	4	4	4	4	4	4	4	5	5	4	4	3	4	4	4	4
4	2	2514	51	1	1	2	1	#NULL!	1	#NULL!	#NULL!	#NULL!	#NULL!	#NULL!	#NULL!	1	1	53	155	22.0604	1	1	81	3	3	5	5	5	5	5	5	3	4	3	4	5	5	5	4	5	3	4	5	4	5	5	5	5	3
4	1	2514	51	1	2	2	1	#NULL!	1	#NULL!	#NULL!	#NULL!	#NULL!	#NULL!	#NULL!	1	1	70	172	23.6614	1	5	82	4	3	3	5	5	4	4	4	3	4	2	3	3	4	4	4	4	4	5	3	4	4	4	4	4	4
4	2	2514	51	1	2	4	1	#NULL!	1	#NULL!	#NULL!	#NULL!	#NULL!	#NULL!	#NULL!	1	1	78	160	30.4687	1	1	105	3	4	4	4	4	4	4	5	5	3	4	4	4	4	4	4	5	5	4	4	4	4	4	4	4	3
4	2	2513	52	1	2	2	2	#NULL!	2	0	0	0	0	0	1	1	1	73	155	30.385	1	1	100	4	3	3	5	4	4	3	5	3	4	3	4	5	5	5	4	4	4	5	5	4	3	5	4	5	4
4	2	2513	52	1	5	2	1	#NULL!	1	#NULL!	#NULL!	#NULL!	#NULL!	#NULL!	#NULL!	1	1	56	152	24.2382	1	5	87	3	3	4	4	4	4	5	5	5	4	2	3	4	3	4	4	3	2	4	4	4	4	4	4	4	4
4	1	2513	52	1	2	3	1	#NULL!	1	#NULL!	#NULL!	#NULL!	#NULL!	#NULL!	#NULL!	1	1	63	160	24.6094	5	5	82	3	4	3	4	4	4	4	5	4	4	4	4	4	4	3	3	2	5	4	4	4	4	4	4	4	5
4	2	2513	52	1	2	4	2	#NULL!	1	#NULL!	#NULL!	#NULL!	#NULL!	#NULL!	#NULL!	1	1	73	165	26.8136	5	5	88	2	5	5	5	5	5	4	3	2	5	3	5	5	5	5	5	2	5	5	4	3	5	5	5	2	5
4	1	2513	52	1	2	2	1	#NULL!	1	#NULL!	#NULL!	#NULL!	#NULL!	#NULL!	#NULL!	1	1	55	160	21.4844	1	5	77	4	5	4	4	4	4	4	4	5	4	3	4	4	3	4	4	3	4	4	3	4	4	4	4	4	5
4	2	2513	52	1	2	2	1	#NULL!	1	#NULL!	#NULL!	#NULL!	#NULL!	#NULL!	#NULL!	1	2	78	155	32.4662	1	1	93	3	4	4	2	3	3	3	3	4	3	3	3	4	3	4	4	4	3	3	3	3	4	3	3	3	3
4	2	2512	53	1	2	3	1	#NULL!	1	#NULL!	#NULL!	#NULL!	#NULL!	#NULL!	#NULL!	1	1	71	150	31.5556	1	1	69	3	3	3	4	3	4	3	3	2	3	3	2	4	4	3	4	2	2	3	3	3	3	4	3	2	3
4	2	2512	53	1	2	4	1	#NULL!	1	#NULL!	#NULL!	#NULL!	#NULL!	#NULL!	#NULL!	1	1	56	146	26.2713	1	4	87	5	3	5	3	5	5	5	5	3	5	2	5	4	4	4	5	4	5	3	4	4	4	5	5	4	3
4	2	2512	53	1	2	4	2	#NULL!	1	#NULL!	#NULL!	#NULL!	#NULL!	#NULL!	#NULL!	1	1	60	165	22.0386	1	5	85	5	2	5	5	5	5	5	5	3	5	3	5	5	5	5	5	2	4	5	5	3	5	5	5	5	4
4	2	2512	53	1	2	2	1	#NULL!	1	#NULL!	#NULL!	#NULL!	#NULL!	#NULL!	#NULL!	1	1	52	155	21.6441	1	4	86	4	5	4	5	4	4	4	4	3	4	5	4	4	4	4	4	3	5	4	4	4	5	5	5	3	3
4	1	2512	53	1	2	4	3	#NULL!	2	0	0	0	0	0	1	1	1	60	172	20.2812	4	5	71	5	4	5	5	5	5	4	4	5	4	4	4	5	4	4	5	4	3	4	4	4	5	5	5	5	4
4	1	2512	53	1	2	2	1	#NULL!	2	0	0	0	0	#NULL!	1	1	1	80	163	30.1103	1	1	98	3	3	3	4	4	3	4	4	4	4	3	2	3	3	3	3	3	3	4	3	4	4	4	4	4	3
4	1	2512	53	1	2	4	1	#NULL!	1	#NULL!	#NULL!	#NULL!	#NULL!	#NULL!	#NULL!	1	1	56	159	22.151	1	5	77	4	3	4	4	3	4	4	4	4	4	4	4	4	4	4	4	3	4	4	3	4	4	4	4	4	4
4	1	2512	53	1	2	6	4	#NULL!	2	0	0	0	0	0	1	1	1	76	172	25.6896	1	1	86	4	4	3	4	3	3	3	3	4	3	5	3	3	3	4	3	3	4	3	3	3	3	3	5	3	3
4	1	2512	53	1	2	2	1	#NULL!	1	#NULL!	#NULL!	#NULL!	#NULL!	#NULL!	#NULL!	1	1	42	160	16.4062	1	1	69	4	2	4	4	4	4	4	4	3	4	3	4	4	4	4	4	4	4	4	4	4	4	4	4	3	4
4	1	2512	53	1	2	2	1	#NULL!	1	#NULL!	#NULL!	#NULL!	#NULL!	#NULL!	#NULL!	1	1	62	160	24.2187	5	1	80	3	2	3	3	3	3	3	3	5	3	2	4	4	3	4	3	3	4	4	4	3	4	3	4	4	3
4	2	2511	54	1	3	2	1	#NULL!	1	#NULL!	#NULL!	#NULL!	#NULL!	#NULL!	#NULL!	1	1	77	156	31.6404	1	1	103	4	2	3	3	3	4	4	2	2	3	3	3	3	3	4	3	3	3	5	3	5	5	5	5	5	3
4	2	2511	54	1	2	3	1	#NULL!	1	#NULL!	#NULL!	#NULL!	#NULL!	#NULL!	#NULL!	1	1	80	150	35.5556	1	1	100	4	3	4	4	4	4	3	4	5	4	3	4	4	3	4	4	3	4	3	4	4	4	4	5	3	4
4	2	2511	54	1	5	2	1	#NULL!	1	#NULL!	#NULL!	#NULL!	#NULL!	#NULL!	#NULL!	2	1	45	150	20	1	4	66	4	1	4	4	3	4	4	3	5	4	2	4	4	4	3	3	4	4	4	4	4	4	4	4	4	3
4	2	2511	54	1	2	2	1	#NULL!	2	0	0	0	0	0	1	1	2	49	155	20.3954	1	1	81	2	5	4	3	2	4	4	4	3	4	2	4	4	3	3	4	3	4	4	3	3	4	4	4	4	3
4	2	2511	54	1	2	2	1	#NULL!	1	#NULL!	#NULL!	#NULL!	#NULL!	#NULL!	#NULL!	1	1	69	154	29.0943	1	1	106	3	4	3	4	4	3	3	3	5	3	4	3	3	3	3	4	4	3	3	3	3	4	3	4	3	4
4	1	2511	54	1	2	2	1	#NULL!	1	#NULL!	#NULL!	#NULL!	#NULL!	#NULL!	#NULL!	1	1	52	159	20.5688	1	1	83	2	5	4	4	4	4	3	3	5	3	5	3	4	4	4	4	4	5	5	3	4	5	4	4	4	5
4	1	2510	55	1	2	4	1	#NULL!	1	#NULL!	#NULL!	#NULL!	#NULL!	#NULL!	#NULL!	1	1	52	159	20.5688	1	5	78	4	2	4	3	4	4	4	4	3	4	3	4	4	4	4	4	4	4	4	3	4	4	4	4	4	4
4	1	2510	55	1	3	2	1	#NULL!	1	#NULL!	#NULL!	#NULL!	#NULL!	#NULL!	#NULL!	1	1	68	150	30.2222	1	1	99	2	1	3	4	2	3	3	5	5	4	1	4	3	3	4	5	3	5	3	4	4	3	5	4	1	5
4	2	2510	55	1	4	4	1	#NULL!	2	0	0	0	0	0	1	1	1	58	156	23.833	1	1	85	4	4	5	5	4	4	5	5	5	5	4	5	5	5	5	5	5	5	5	5	5	5	5	5	3	5
4	2	2570	55	1	4	2	1	#NULL!	1	#NULL!	#NULL!	#NULL!	#NULL!	#NULL!	#NULL!	1	1	57	152	24.6711	1	1	91	3	5	4	3	4	4	4	3	5	4	4	5	4	5	3	2	2	4	4	3	3	4	5	5	1	3
4	2	2510	55	1	2	2	1	#NULL!	1	#NULL!	#NULL!	#NULL!	#NULL!	#NULL!	#NULL!	1	1	55	155	22.8928	1	5	85	3	5	4	5	4	4	4	5	3	3	3	4	4	4	3	3	3	3	1	3	4	4	4	3	3	3
4	1	2510	55	1	2	2	4	#NULL!	1	#NULL!	#NULL!	#NULL!	#NULL!	#NULL!	#NULL!	1	1	67	159	26.5021	1	5	94	4	3	5	5	5	5	5	5	4	5	3	5	5	5	5	5	3	5	5	3	5	5	5	5	4	5
4	2	2510	55	1	2	4	1	#NULL!	1	#NULL!	#NULL!	#NULL!	#NULL!	#NULL!	#NULL!	2	1	70	155	29.1363	1	1	92	3	4	3	4	3	4	3	3	3	3	2	4	4	3	3	3	3	4	3	3	3	3	4	4	3	3
4	2	2510	55	1	2	3	1	#NULL!	1	#NULL!	#NULL!	#NULL!	#NULL!	#NULL!	#NULL!	1	1	53	150	23.5556	1	5	91	3	5	4	5	5	4	5	5	5	5	3	5	5	4	5	5	4	5	5	5	5	5	5	5	3	5
4	2	2510	55	1	4	2	1	#NULL!	1	#NULL!	#NULL!	#NULL!	#NULL!	#NULL!	#NULL!	1	1	40	155	16.6493	1	1	74	3	2	3	4	3	3	3	3	4	3	5	3	4	4	3	3	3	5	4	4	4	3	3	3	2	3
4	2	2510	55	1	2	2	1	#NULL!	1	#NULL!	#NULL!	#NULL!	#NULL!	#NULL!	#NULL!	2	1	68	155	28.3039	1	5	94	4	3	4	4	4	5	4	3	3	4	3	4	3	3	4	3	2	4	4	4	3	4	4	4	4	3
4	2	2510	55	1	2	2	1	#NULL!	1	#NULL!	#NULL!	#NULL!	#NULL!	#NULL!	#NULL!	1	1	58	165	21.3039	1	1	86	3	3	3	4	3	4	4	3	5	4	5	4	4	4	3	3	4	4	4	4	3	4	3	4	3	3
4	2	2509	56	1	2	2	1	#NULL!	1	#NULL!	#NULL!	#NULL!	#NULL!	#NULL!	#NULL!	1	1	75	160	29.2969	1	1	110	5	2	4	5	3	4	4	5	2	4	3	4	4	4	4	4	4	4	4	4	4	4	4	5	4	4
4	2	2509	56	1	2	2	1	#NULL!	1	#NULL!	#NULL!	#NULL!	#NULL!	#NULL!	#NULL!	1	1	80	157	32.4557	1	1	95	3	2	5	3	5	5	5	5	2	1	2	5	5	5	5	5	5	5	4	5	5	5	5	5	5	5
4	1	2509	56	1	1	2	1	#NULL!	1	#NULL!	#NULL!	#NULL!	#NULL!	#NULL!	#NULL!	1	1	49	150	21.7778	1	1	75	3	3	3	2	3	3	4	5	5	2	2	4	3	3	4	3	3	4	5	3	4	3	4	5	5	3
4	1	2509	56	1	5	2	1	#NULL!	1	#NULL!	#NULL!	#NULL!	#NULL!	#NULL!	#NULL!	1	1	71	151	31.139	1	5	92	3	4	4	4	4	4	4	4	5	4	4	4	4	3	3	3	2	3	2	4	4	4	4	4	2	3
4	1	2509	56	1	2	2	1	#NULL!	1	#NULL!	#NULL!	#NULL!	#NULL!	#NULL!	#NULL!	1	1	63	156	25.8876	1	1	91	5	3	3	5	5	4	3	3	3	5	2	3	3	3	5	5	5	4	3	3	3	3	5	5	3	3
4	2	2509	56	1	2	2	3	#NULL!	2	0	0	0	0	0	1	1	1	70	160	27.3437	1	1	92	3	5	3	4	4	4	4	4	5	4	3	4	4	4	4	4	3	3	2	3	4	4	4	4	4	4
4	2	2509	56	1	2	2	1	#NULL!	1	#NULL!	#NULL!	#NULL!	#NULL!	#NULL!	#NULL!	1	1	66	164	24.539	1	1	83	4	3	4	3	4	3	4	4	4	3	3	4	3	3	4	4	3	4	3	3	4	3	3	4	4	3
4	2	2509	56	1	1	3	1	#NULL!	1	#NULL!	#NULL!	#NULL!	#NULL!	#NULL!	#NULL!	1	1	46	150	20.4444	1	1	71	4	4	4	4	4	4	4	4	3	4	5	4	5	4	4	4	4	5	4	3	4	4	4	4	4	4
4	2	2509	56	1	2	2	1	#NULL!	1	#NULL!	#NULL!	#NULL!	#NULL!	#NULL!	#NULL!	1	2	54	160	21.0937	1	1	80	3	3	4	4	4	4	4	4	5	4	4	4	4	4	3	4	4	4	4	4	4	4	4	4	5	4
4	2	2509	56	1	2	2	2	#NULL!	1	#NULL!	#NULL!	#NULL!	#NULL!	#NULL!	#NULL!	1	1	52	166	18.8707	1	1	68	3	3	3	2	3	4	4	3	4	4	3	4	4	4	3	3	3	3	2	2	3	4	3	4	3	3
4	2	2508	57	2	2	2	7	#NULL!	1	#NULL!	#NULL!	#NULL!	#NULL!	#NULL!	#NULL!	1	2	71	160	27.7344	2	5	86	3	4	4	3	4	4	4	4	5	4	2	4	4	4	4	4	3	4	4	4	4	4	4	4	3	3
4	1	2508	57	1	2	4	1	#NULL!	1	#NULL!	#NULL!	#NULL!	#NULL!	#NULL!	#NULL!	1	1	50	155	20.8117	5	1	68	4	3	4	4	4	4	4	4	2	4	5	4	4	4	4	4	3	4	4	4	4	4	4	4	4	4
4	2	2508	57	1	1	2	1	#NULL!	1	#NULL!	#NULL!	#NULL!	#NULL!	#NULL!	#NULL!	2	1	50	158	20.0288	1	1	72	4	5	4	4	4	5	4	4	5	4	5	4	4	4	4	5	3	4	3	4	4	4	4	4	2	4
4	2	2508	57	1	4	2	1	#NULL!	1	#NULL!	#NULL!	#NULL!	#NULL!	#NULL!	#NULL!	1	1	65	153	27.7671	1	1	90	4	3	4	2	3	3	3	3	4	3	2	3	3	4	3	3	3	4	3	2	3	4	3	4	3	3
4	2	2508	57	1	1	2	1	#NULL!	1	#NULL!	#NULL!	#NULL!	#NULL!	#NULL!	#NULL!	1	1	52	159	20.5688	1	4	76	3	5	3	3	3	2	4	4	4	3	3	3	4	3	4	3	3	4	3	2	4	4	4	4	4	3
4	1	2507	58	1	2	4	1	#NULL!	1	#NULL!	#NULL!	#NULL!	#NULL!	#NULL!	#NULL!	1	1	52	160	20.3125	5	5	70	5	5	4	5	4	4	3	4	5	2	3	3	3	4	5	5	3	3	5	2	4	4	4	4	1	4
4	1	2507	58	1	2	2	1	#NULL!	1	#NULL!	#NULL!	#NULL!	#NULL!	#NULL!	#NULL!	1	1	48	162	18.2899	5	5	71	4	4	4	5	5	5	5	5	5	3	3	4	4	4	3	3	4	4	4	3	4	5	5	5	4	4
4	1	2507	58	1	1	3	1	#NULL!	1	#NULL!	#NULL!	#NULL!	#NULL!	#NULL!	#NULL!	1	1	60	160	23.4375	4	5	85	4	4	4	4	4	4	3	4	4	4	2	4	4	4	4	4	3	4	4	4	4	4	4	4	3	4
4	1	2507	58	1	2	2	1	#NULL!	1	#NULL!	#NULL!	#NULL!	#NULL!	#NULL!	#NULL!	1	1	59	170	20.4152	5	5	76	4	4	3	5	4	4	4	4	5	4	5	3	3	3	4	3	3	4	3	3	4	4	3	3	3	4
4	1	2507	58	1	2	2	1	#NULL!	2	0	0	0	0	0	1	1	1	60	170	20.7612	4	4	85	1	3	3	5	5	5	5	3	4	3	3	3	5	5	5	3	5	5	5	5	5	3	5	3	3	2
4	2	2507	58	1	2	3	1	#NULL!	1	#NULL!	#NULL!	#NULL!	#NULL!	#NULL!	#NULL!	1	1	45	157	18.2563	1	1	70	4	5	3	4	3	3	3	3	4	3	5	3	3	3	4	3	3	4	4	4	4	4	4	4	3	3
4	1	2507	58	1	2	3	1	#NULL!	1	#NULL!	#NULL!	#NULL!	#NULL!	#NULL!	#NULL!	1	1	49	165	17.9982	4	5	70	4	2	4	4	4	4	4	4	3	4	3	4	4	4	4	4	3	4	4	4	4	4	4	4	3	4
4	1	2507	58	1	2	4	1	#NULL!	1	#NULL!	#NULL!	#NULL!	#NULL!	#NULL!	#NULL!	1	1	75	165	27.5482	1	1	103	3	4	3	3	3	3	3	3	5	2	1	3	3	3	3	4	3	4	3	3	4	4	3	4	4	3
4	2	2507	58	1	2	2	1	#NULL!	1	#NULL!	#NULL!	#NULL!	#NULL!	#NULL!	#NULL!	1	1	79	165	29.0174	1	5	103	3	4	3	4	3	4	3	3	5	3	4	4	4	4	3	4	3	4	4	4	3	4	4	4	4	3
4	2	2506	59	1	2	5	3	#NULL!	1	#NULL!	#NULL!	#NULL!	#NULL!	#NULL!	#NULL!	1	1	69	150	30.6667	1	5	95	3	5	5	5	5	5	5	5	5	5	5	5	5	5	5	5	5	5	5	5	5	5	5	5	2	5
4	2	2506	59	1	4	2	3	#NULL!	1	#NULL!	#NULL!	#NULL!	#NULL!	#NULL!	#NULL!	1	1	51	153	21.7865	1	1	84	4	2	4	4	4	4	4	3	5	3	5	4	4	4	4	4	4	3	3	4	4	4	4	4	4	4
4	2	2505	60	1	4	6	1	#NULL!	1	#NULL!	#NULL!	#NULL!	#NULL!	#NULL!	#NULL!	1	1	58	155	24.1415	1	1	84	3	2	5	4	4	5	5	5	2	5	2	4	5	5	5	5	3	3	4	5	5	4	4	5	5	3
4	2	2505	60	1	2	2	1	#NULL!	2	0	0	0	0	0	1	1	1	70	153	29.903	1	1	112	3	2	3	3	4	4	2	3	4	2	3	4	4	4	2	3	3	3	3	4	3	3	3	3	3	3
4	2	2505	60	1	2	2	1	#NULL!	1	#NULL!	#NULL!	#NULL!	#NULL!	#NULL!	#NULL!	1	1	54	150	24	1	1	92	4	4	4	4	4	4	4	4	4	4	3	4	3	4	4	4	2	4	2	4	4	4	4	4	4	3
4	2	2505	60	1	2	4	1	#NULL!	1	#NULL!	#NULL!	#NULL!	#NULL!	#NULL!	#NULL!	1	2	57	160	22.2656	1	1	86	3	3	3	4	4	4	4	4	5	3	2	4	4	4	4	4	4	4	4	3	4	4	5	5	4	3
4	2	2505	60	1	2	2	1	#NULL!	1	#NULL!	#NULL!	#NULL!	#NULL!	#NULL!	#NULL!	1	1	73	165	26.8136	1	1	91	4	5	4	5	5	4	5	5	5	5	3	4	5	5	5	5	4	3	4	5	5	4	5	5	3	5
4	1	2505	60	1	2	2	1	#NULL!	1	#NULL!	#NULL!	#NULL!	#NULL!	#NULL!	#NULL!	1	1	55	168	19.487	5	5	75	4	4	4	2	4	4	5	4	3	4	3	5	3	5	5	4	3	4	4	4	5	5	5	5	2	4
4	1	2505	60	1	2	2	1	#NULL!	1	#NULL!	#NULL!	#NULL!	#NULL!	#NULL!	#NULL!	1	1	65	165	23.8751	4	4	92	5	3	5	5	5	5	5	5	3	5	2	5	5	4	5	5	5	5	4	5	5	5	1	5	5	5
4	1	2505	60	1	2	4	1	#NULL!	1	#NULL!	#NULL!	#NULL!	#NULL!	#NULL!	#NULL!	1	1	53	153	22.6409	5	5	75	5	5	4	5	3	4	4	4	5	4	3	4	4	4	5	5	4	3	5	3	5	4	3	5	1	5
4	1	2505	60	1	2	2	4	#NULL!	1	#NULL!	#NULL!	#NULL!	#NULL!	#NULL!	#NULL!	1	1	52	165	19.1001	5	5	77	4	5	3	2	4	4	4	4	5	3	5	3	3	4	4	3	3	3	5	3	4	3	3	3	3	3
4	2	2505	60	1	1	2	2	#NULL!	1	#NULL!	#NULL!	#NULL!	#NULL!	#NULL!	#NULL!	1	1	53	160	20.7031	1	1	72	4	4	4	4	4	4	5	5	2	4	2	4	3	3	3	3	3	4	4	3	3	4	4	4	2	4
4	2	2505	60	1	4	2	2	#NULL!	1	#NULL!	#NULL!	#NULL!	#NULL!	#NULL!	#NULL!	1	1	62	150	27.5556	1	1	95	4	4	4	4	5	4	4	4	5	4	5	4	4	4	4	4	4	5	3	4	3	4	4	4	2	4
4	2	2503	62	1	4	2	1	#NULL!	1	#NULL!	#NULL!	#NULL!	#NULL!	#NULL!	#NULL!	1	1	58	145	27.5862	1	1	97	5	2	5	5	5	5	5	5	3	5	2	5	5	5	5	5	5	5	5	5	5	5	5	5	5	5
4	2	2503	62	1	5	2	1	#NULL!	1	#NULL!	#NULL!	#NULL!	#NULL!	#NULL!	#NULL!	1	1	56	152	24.2382	1	1	92	3	4	3	4	4	4	4	4	4	3	4	3	3	4	4	4	3	4	3	4	3	4	3	3	3	3
4	2	2503	62	1	1	2	1	#NULL!	2	0	0	0	0	0	1	1	1	45	147	20.8247	1	1	75	3	3	4	3	4	4	4	4	5	4	4	4	4	4	4	4	3	4	4	4	4	4	4	4	4	3
4	2	2503	62	1	4	2	1	#NULL!	2	0	0	0	0	0	1	1	1	43	160	16.7969	1	5	81	5	3	3	5	5	4	4	4	5	2	3	4	4	3	4	4	4	4	4	3	3	2	2	3	1	3
4	1	2503	62	1	2	3	1	#NULL!	1	#NULL!	#NULL!	#NULL!	#NULL!	#NULL!	#NULL!	1	1	60	159	23.7332	1	1	85	3	2	4	3	4	4	4	4	2	4	4	4	4	4	4	4	4	4	4	3	4	4	4	5	4	4
4	2	2503	62	1	4	2	3	#NULL!	1	#NULL!	#NULL!	#NULL!	#NULL!	#NULL!	#NULL!	1	1	52	156	21.3675	1	4	87	4	2	5	5	4	4	4	4	3	4	3	5	5	4	4	4	3	4	4	5	4	5	5	5	3	3
4	1	2503	62	1	1	2	1	#NULL!	1	#NULL!	#NULL!	#NULL!	#NULL!	#NULL!	#NULL!	1	1	50	160	19.5312	1	1	60	3	3	3	4	3	4	4	4	2	4	3	4	4	4	4	4	4	4	4	4	4	3	4	4	4	4
4	2	2503	62	1	2	2	1	#NULL!	2	0	0	0	0	0	1	1	1	51	155	21.2279	1	4	77	3	3	5	3	4	5	5	5	2	5	2	5	5	5	5	5	3	5	5	4	4	3	5	3	3	5
4	2	2503	62	1	2	4	1	#NULL!	1	#NULL!	#NULL!	#NULL!	#NULL!	#NULL!	#NULL!	1	1	61	165	22.4059	1	1	84	3	4	3	3	3	3	3	4	5	3	3	3	4	3	4	3	3	4	4	4	3	4	4	4	4	4
4	1	2502	63	1	3	2	1	#NULL!	1	#NULL!	#NULL!	#NULL!	#NULL!	#NULL!	#NULL!	1	1	68	165	24.977	5	1	98	5	2	3	5	5	5	5	5	2	3	3	5	3	3	5	5	5	4	4	2	3	3	5	5	5	3
4	2	2502	63	1	2	2	1	#NULL!	1	#NULL!	#NULL!	#NULL!	#NULL!	#NULL!	#NULL!	1	1	56	143	27.3852	1	1	97	3	3	3	3	3	3	3	3	4	2	4	4	4	4	4	4	4	3	4	3	4	4	4	4	4	4
4	2	2502	63	1	2	2	1	#NULL!	1	#NULL!	#NULL!	#NULL!	#NULL!	#NULL!	#NULL!	1	1	56	160	21.875	1	1	82	5	4	5	5	5	5	5	5	4	5	4	5	5	5	5	5	2	5	5	4	5	3	5	2	3	5
4	2	2502	63	1	2	2	1	#NULL!	1	#NULL!	#NULL!	#NULL!	#NULL!	#NULL!	#NULL!	1	1	41	148	18.718	1	1	72	4	4	3	4	4	4	4	4	4	4	3	4	4	4	4	4	4	4	3	4	4	4	4	4	3	4
4	2	2502	63	1	2	3	1	#NULL!	1	#NULL!	#NULL!	#NULL!	#NULL!	#NULL!	#NULL!	1	1	57	160	22.2656	1	1	92	4	3	4	4	4	3	4	4	4	3	3	4	4	2	3	3	3	3	3	3	4	3	4	5	2	5
4	2	2502	63	1	2	2	1	#NULL!	1	#NULL!	#NULL!	#NULL!	#NULL!	#NULL!	#NULL!	1	1	43	160	16.7969	1	1	62	4	5	5	3	4	4	4	4	4	4	3	5	5	5	4	4	3	5	3	4	5	5	5	5	3	3
4	1	2502	63	1	2	4	1	#NULL!	1	#NULL!	#NULL!	#NULL!	#NULL!	#NULL!	#NULL!	1	1	60	160	23.4375	1	5	80	4	3	4	5	5	4	4	4	3	4	2	4	4	4	4	4	4	4	5	4	5	5	4	4	4	4
4	2	2501	64	1	2	2	1	#NULL!	2	0	0	0	0	0	1	1	1	45	148	20.5442	1	1	87	4	2	4	4	3	3	3	3	3	4	3	4	4	4	4	4	4	4	3	3	4	4	4	4	4	4
4	2	2501	64	1	2	2	1	#NULL!	2	0	0	0	0	0	1	1	1	35	153	14.9515	1	1	63	5	3	2	5	5	4	5	5	5	4	2	5	4	4	4	4	4	4	4	3	4	3	3	3	1	2
4	1	2501	64	1	2	4	7	#NULL!	1	#NULL!	#NULL!	#NULL!	#NULL!	#NULL!	#NULL!	1	1	90	156	36.9822	1	1	117	3	5	4	4	4	4	4	3	5	4	4	4	4	4	4	4	3	3	4	4	4	4	4	4	4	3
4	2	2501	64	1	2	2	6	#NULL!	1	#NULL!	#NULL!	#NULL!	#NULL!	#NULL!	#NULL!	1	1	53	154	22.3478	1	1	80	3	3	4	4	4	4	4	4	3	4	3	4	4	4	4	4	4	4	4	4	4	4	4	5	4	4
4	1	2501	64	1	2	2	1	#NULL!	1	#NULL!	#NULL!	#NULL!	#NULL!	#NULL!	#NULL!	1	2	56	160	21.875	5	4	79	4	4	4	4	4	4	4	4	5	4	4	4	4	4	4	5	5	5	4	4	4	5	4	5	4	5
4	2	2501	64	1	3	3	3	#NULL!	1	#NULL!	#NULL!	#NULL!	#NULL!	#NULL!	#NULL!	1	1	60	164	22.3081	1	1	86	3	2	4	3	3	4	3	4	4	4	3	3	4	3	4	4	3	4	4	3	4	5	4	4	1	3
4	1	2501	64	1	2	2	1	#NULL!	1	#NULL!	#NULL!	#NULL!	#NULL!	#NULL!	#NULL!	1	1	54	171	18.4672	1	4	77	3	4	3	5	3	5	5	4	4	3	4	3	2	5	3	2	5	3	5	5	5	3	4	5	5	5
4	1	2500	65	1	2	2	1	#NULL!	1	#NULL!	#NULL!	#NULL!	#NULL!	#NULL!	#NULL!	2	1	50	160	19.5312	1	5	76	4	2	4	5	5	5	5	4	3	4	2	5	5	5	4	5	4	3	4	4	4	4	5	5	4	5
4	2	2500	65	1	2	2	1	#NULL!	2	0	0	0	0	0	1	1	1	70	150	31.1111	1	5	101	3	4	3	4	4	4	4	4	5	3	3	4	2	2	3	3	3	3	3	2	3	2	3	3	1	3
4	2	2500	65	1	4	2	1	#NULL!	2	0	0	0	0	0	1	1	1	60	150	26.6667	1	1	106	3	2	3	4	4	4	2	4	3	3	2	2	3	4	3	2	2	4	2	3	4	3	2	2	3	3
4	2	2500	65	1	2	2	1	#NULL!	1	#NULL!	#NULL!	#NULL!	#NULL!	#NULL!	#NULL!	1	1	67	150	29.7778	1	1	100	4	5	4	5	5	3	4	4	5	4	1	4	5	5	4	5	3	4	4	5	4	4	5	4	4	5
4	2	2500	65	1	5	2	1	#NULL!	1	#NULL!	#NULL!	#NULL!	#NULL!	#NULL!	#NULL!	1	1	48	150	21.3333	1	1	74	3	3	4	3	4	4	4	4	4	4	4	4	4	4	4	4	4	3	4	4	4	4	4	4	5	4
4	1	2499	66	1	4	2	1	#NULL!	1	#NULL!	#NULL!	#NULL!	#NULL!	#NULL!	#NULL!	1	1	50	165	18.3655	5	5	77	3	3	4	4	4	4	4	4	3	4	3	4	4	4	3	3	3	3	4	4	4	4	4	4	3	3
4	2	2499	66	1	2	2	1	#NULL!	1	#NULL!	#NULL!	#NULL!	#NULL!	#NULL!	#NULL!	1	1	60	153	25.6312	1	1	98	3	3	4	4	4	3	3	3	2	4	3	3	3	3	3	3	3	3	3	3	3	3	4	4	4	4
4	1	2499	66	1	2	2	1	#NULL!	1	#NULL!	#NULL!	#NULL!	#NULL!	#NULL!	#NULL!	1	1	60	165	22.0386	1	1	91	3	5	4	3	4	4	4	4	5	4	4	4	4	4	4	4	3	4	3	4	4	4	4	4	3	4
4	1	2499	66	1	2	2	1	#NULL!	1	#NULL!	#NULL!	#NULL!	#NULL!	#NULL!	#NULL!	1	1	73	165	26.8136	1	1	93	3	2	4	3	3	4	3	4	4	3	4	3	2	2	3	3	2	4	2	3	3	3	3	3	3	3
4	1	2498	67	1	5	2	1	#NULL!	1	#NULL!	#NULL!	#NULL!	#NULL!	#NULL!	#NULL!	1	1	75	172	25.3515	5	1	79	4	3	3	4	4	4	4	4	3	4	3	4	4	5	4	4	3	4	4	4	4	3	5	3	3	4
4	2	2498	67	1	4	2	1	#NULL!	1	#NULL!	#NULL!	#NULL!	#NULL!	#NULL!	#NULL!	1	1	51	155	21.2279	1	1	83	4	5	4	4	4	4	4	4	5	1	4	4	4	4	4	4	3	4	4	4	4	4	4	4	2	4
4	1	2498	67	1	4	3	1	#NULL!	1	#NULL!	#NULL!	#NULL!	#NULL!	#NULL!	#NULL!	1	1	69	168	24.4473	1	5	90	4	3	4	4	4	4	4	4	5	4	4	4	4	3	4	4	4	4	3	4	4	4	4	4	3	4
4	2	2498	67	1	2	2	1	#NULL!	1	#NULL!	#NULL!	#NULL!	#NULL!	#NULL!	#NULL!	1	1	56	149	25.2241	1	1	90	3	3	4	4	4	4	5	5	5	4	2	3	4	5	4	4	3	5	5	5	5	4	4	4	4	4
4	1	2497	68	1	2	2	1	#NULL!	1	#NULL!	#NULL!	#NULL!	#NULL!	#NULL!	#NULL!	1	1	48	160	18.75	1	1	68	5	2	1	5	5	5	5	5	2	1	2	1	3	3	3	4	4	3	2	2	3	2	3	3	1	5
4	2	2497	68	1	2	2	1	#NULL!	1	#NULL!	#NULL!	#NULL!	#NULL!	#NULL!	#NULL!	1	1	70	155	29.1363	1	1	96	3	3	3	3	3	4	3	4	3	4	3	3	3	3	4	4	3	4	3	3	4	4	3	4	3	4
4	2	2496	69	1	4	2	3	#NULL!	1	#NULL!	#NULL!	#NULL!	#NULL!	#NULL!	#NULL!	1	1	36	150	16	1	1	60	3	3	4	5	3	3	3	4	4	4	3	4	5	5	5	5	3	5	4	5	4	5	5	5	3	4
4	2	2496	69	1	4	2	1	#NULL!	1	#NULL!	#NULL!	#NULL!	#NULL!	#NULL!	#NULL!	1	1	45	150	20	1	1	73	3	3	3	4	4	3	4	3	5	3	3	3	4	3	3	3	3	4	2	3	3	4	3	4	4	3
4	2	2496	69	1	2	2	1	#NULL!	1	#NULL!	#NULL!	#NULL!	#NULL!	#NULL!	#NULL!	1	1	70	163	26.3465	1	1	106	4	2	4	3	4	4	4	3	5	4	2	3	3	4	4	3	3	4	4	4	4	4	4	4	4	3
4	2	2496	69	1	2	2	1	#NULL!	1	#NULL!	#NULL!	#NULL!	#NULL!	#NULL!	#NULL!	1	1	45	140	22.9592	1	1	78	4	4	4	4	4	4	4	4	4	4	2	4	4	4	4	4	4	4	4	4	4	4	4	4	3	4
4	2	2495	70	1	3	2	1	#NULL!	1	#NULL!	#NULL!	#NULL!	#NULL!	#NULL!	#NULL!	1	1	50	150	22.2222	1	1	90	4	3	4	5	5	5	5	5	5	1	2	4	4	4	4	4	4	4	5	4	4	4	4	5	3	4
4	2	2495	70	1	2	2	6	#NULL!	1	#NULL!	#NULL!	#NULL!	#NULL!	#NULL!	#NULL!	1	1	30	135	16.4609	1	1	78	3	4	3	4	3	3	3	3	5	3	4	3	4	3	3	3	4	4	4	4	4	4	3	3	3	4
4	2	2495	70	1	2	2	7	#NULL!	2	0	0	0	0	0	1	1	1	65	150	28.8889	1	1	102	4	4	2	2	4	4	4	4	4	3	4	3	3	1	3	3	3	3	3	1	3	3	1	4	1	4
4	2	2494	71	1	2	2	6	#NULL!	1	#NULL!	#NULL!	#NULL!	#NULL!	#NULL!	#NULL!	1	1	46	181	14.0411	1	4	82	3	4	3	4	3	3	3	3	4	3	4	3	4	3	3	3	4	4	4	4	4	4	3	3	3	4
4	2	2494	71	1	4	2	1	#NULL!	1	#NULL!	#NULL!	#NULL!	#NULL!	#NULL!	#NULL!	1	1	54	152	23.3726	1	1	83	3	4	4	4	3	4	4	4	3	3	4	4	4	4	4	3	3	4	4	4	3	4	4	4	3	4
4	2	2494	71	1	4	2	2	#NULL!	1	#NULL!	#NULL!	#NULL!	#NULL!	#NULL!	#NULL!	1	1	54	145	25.6837	1	5	103	3	4	4	3	3	4	4	4	3	3	4	3	3	3	4	4	4	4	4	4	3	3	4	4	4	4
4	1	2494	71	1	2	2	2	#NULL!	1	#NULL!	#NULL!	#NULL!	#NULL!	#NULL!	#NULL!	1	1	51	160	19.9219	5	4	71	4	3	4	5	4	4	4	4	2	4	2	4	4	3	3	3	3	4	3	3	4	4	4	4	3	3
4	2	2494	71	1	4	2	1	#NULL!	1	#NULL!	#NULL!	#NULL!	#NULL!	#NULL!	#NULL!	1	1	64	165	23.5078	5	1	95	5	3	4	4	4	3	5	4	3	4	2	4	4	4	4	4	4	4	4	4	4	4	4	4	4	3
4	2	2494	71	1	2	2	1	#NULL!	1	#NULL!	#NULL!	#NULL!	#NULL!	#NULL!	#NULL!	1	2	52	158	20.83	1	1	82	3	4	4	4	3	3	3	3	4	3	3	3	3	3	3	3	3	4	4	4	4	2	4	2	3	4
4	1	2493	72	1	2	4	1	#NULL!	1	#NULL!	#NULL!	#NULL!	#NULL!	#NULL!	#NULL!	1	1	75	172	25.3515	4	4	94	3	1	3	3	3	3	3	3	2	3	1	3	3	3	4	4	4	4	4	4	4	4	4	4	3	3
4	2	2493	72	1	2	2	1	#NULL!	1	#NULL!	#NULL!	#NULL!	#NULL!	#NULL!	#NULL!	1	1	50	153	21.3593	1	1	90	4	4	4	4	4	4	4	4	5	4	5	4	3	4	4	4	4	4	4	4	4	3	4	3	3	4
4	2	2493	72	1	2	2	7	#NULL!	1	#NULL!	#NULL!	#NULL!	#NULL!	#NULL!	#NULL!	2	2	51	150	22.6667	1	1	83	5	5	1	2	4	4	4	4	4	4	3	2	2	2	3	4	4	2	2	1	2	2	2	4	1	4
4	1	2493	72	1	2	2	1	#NULL!	1	#NULL!	#NULL!	#NULL!	#NULL!	#NULL!	#NULL!	1	1	52	162	19.8141	4	4	78	4	2	3	4	4	4	4	4	4	3	3	3	3	3	3	3	3	4	5	4	4	3	3	3	3	3
4	2	2492	73	1	2	2	7	#NULL!	1	#NULL!	#NULL!	#NULL!	#NULL!	#NULL!	#NULL!	1	1	64	160	25	1	1	90	3	2	3	3	3	3	3	3	3	3	2	4	4	4	4	4	3	4	3	3	4	4	4	4	3	3
4	2	2492	73	1	2	2	3	#NULL!	2	0	0	0	0	0	1	1	1	53	150	23.5556	1	4	81	3	5	4	3	4	4	4	4	5	4	4	4	3	3	3	3	3	4	3	4	3	4	3	3	3	3
4	2	2492	73	1	4	1	3	#NULL!	1	#NULL!	#NULL!	#NULL!	#NULL!	#NULL!	#NULL!	1	1	39	154	16.4446	1	1	68	5	5	1	5	5	4	4	4	5	3	5	3	2	2	3	4	4	2	2	3	3	2	2	4	1	2
4	2	2492	73	1	2	2	7	#NULL!	1	#NULL!	#NULL!	#NULL!	#NULL!	#NULL!	#NULL!	1	1	57	154	24.0344	1	5	88	4	4	2	5	4	4	4	4	5	2	4	4	3	3	3	4	4	3	3	1	3	3	1	3	1	4
4	2	2491	74	1	2	2	1	#NULL!	1	#NULL!	#NULL!	#NULL!	#NULL!	#NULL!	#NULL!	1	1	60	159	23.7332	1	1	84	3	5	3	4	4	4	4	4	5	4	4	4	4	4	4	4	4	4	4	4	4	4	4	4	3	4
4	2	2491	74	1	4	2	6	#NULL!	1	#NULL!	#NULL!	#NULL!	#NULL!	#NULL!	#NULL!	1	1	45	155	18.7305	1	1	92	4	4	4	3	5	4	5	5	2	4	2	4	5	5	5	5	3	5	5	4	4	4	5	4	3	4
4	1	2490	75	1	2	2	6	#NULL!	1	#NULL!	#NULL!	#NULL!	#NULL!	#NULL!	#NULL!	1	1	56	164	20.8209	5	5	83	4	2	4	5	4	4	4	4	2	4	2	4	4	4	4	3	4	4	4	4	4	4	4	4	3	3
4	1	2490	75	1	2	4	1	#NULL!	1	#NULL!	#NULL!	#NULL!	#NULL!	#NULL!	#NULL!	1	1	70	175	22.8571	1	4	82	4	2	4	4	4	4	4	4	2	3	2	4	4	4	4	4	3	4	4	3	4	4	4	4	4	4
4	1	2490	75	1	4	2	1	#NULL!	1	#NULL!	#NULL!	#NULL!	#NULL!	#NULL!	#NULL!	1	1	53	165	19.4674	1	1	78	5	5	2	5	5	5	5	5	5	4	2	3	3	3	3	4	4	3	3	1	2	2	1	2	1	2
4	1	2490	75	1	2	2	1	#NULL!	1	#NULL!	#NULL!	#NULL!	#NULL!	#NULL!	#NULL!	1	1	73	170	25.2595	1	5	91	4	4	4	4	4	4	4	4	5	3	5	4	4	4	4	4	2	4	4	2	4	4	4	4	3	3

## Sheet: Stroke & Non-stroke
No	Group	Sex	BirthYear	Age	Religion	Maritalstatus	Educationlevel	Occupation	diagnosisYr	UD	HUD1	HUD2	HUD3	HUD4	HUD5	HUD6	Histparalysis	HistCVD	Weight	Height	BMI	Smoking	Alcohol	Circumwaist	QL1	QL2	QL3	QL4	QL5	QL6	QL7	QL8	QL9	QL10	QL11	QL12	QL13	QL14	QL15	QL16	QL17	QL18	QL19	QL20	QL21	QL22	QL23	QL24	QL25
121	1	2	2492	73	1	4	2	1	#NULL!	2	0	0	1	0	0	0	1	1	50	155	20.8117	1	1	86	3	2	3	4	4	4	4	3	4	3	3	3	4	4	4	3	2	3	2	3	3	3	4	4	1
176	1	1	2520	45	1	2	2	1	#NULL!	2	0	0	1	0	0	0	1	1	90	182	27.1706	1	5	92	3	4	5	2	3	3	3	3	5	4	4	4	3	4	4	4	2	3	4	3	3	3	4	4	5
266	1	2	2492	73	1	2	2	6	15	2	0	0	0	1	0	0	1	1	55	150	24.4444	1	1	100	3	5	2	4	4	3	3	3	5	3	4	3	4	4	4	4	4	4	3	3	4	3	4	2	2
267	1	2	2511	54	1	2	4	3	#NULL!	2	0	0	1	1	0	0	1	1	60	157	24.3418	1	1	76	1	3	5	3	4	4	4	4	3	4	3	4	4	3	4	4	4	4	3	2	4	4	4	5	5
268	1	1	2507	58	1	2	2	2	#NULL!	2	0	0	1	0	0	0	1	2	72	172	24.3375	1	3	80	3	5	5	3	5	5	3	5	3	5	2	5	5	5	5	3	3	5	3	3	3	3	5	5	5
269	1	1	2499	66	1	4	4	1	#NULL!	2	1	0	1	0	0	1	2	1	50	140	25.5102	1	1	87	1	3	1	4	3	2	2	3	5	3	3	1	4	4	3	3	3	4	3	3	3	2	3	2	3
270	1	2	2513	52	1	3	2	2	2	2	0	0	1	1	0	0	1	1	48	150	21.3333	1	1	68	4	2	3	2	2	3	3	3	3	3	2	4	5	3	3	3	1	3	4	4	3	3	4	4	4
271	1	2	2500	65	1	2	2	1	2	2	0	0	1	1	0	0	1	1	60	152	25.9695	1	1	76	3	5	4	3	4	4	4	3	5	4	4	4	4	4	4	4	3	4	3	4	4	4	4	4	3
272	1	2	2502	63	1	4	2	1	10	2	0	0	1	1	0	0	1	1	73	155	30.385	1	1	112	3	4	4	3	3	3	4	3	2	3	2	4	4	4	4	4	3	4	3	3	3	4	4	4	5
273	1	1	2493	72	1	2	4	6	6	2	0	0	1	1	0	0	1	1	71	159	28.0843	1	5	82	4	3	4	5	4	4	4	3	3	4	3	4	4	4	4	4	4	4	4	4	4	4	4	4	4
274	1	1	2490	75	1	2	2	1	10	2	0	0	1	1	0	0	1	1	54	165	19.8347	1	3	76	1	3	3	5	5	5	5	5	2	4	3	3	5	4	4	4	3	4	4	5	3	3	4	3	4
275	1	2	2506	59	1	2	7	4	#NULL!	2	0	0	1	0	0	0	1	1	72	164	26.7698	1	4	88	3	3	4	2	4	3	4	4	3	4	3	5	5	5	5	5	4	5	5	2	5	4	4	4	4
276	1	1	2499	66	1	2	5	4	8	2	0	0	1	1	0	0	1	1	65	165	23.8751	1	5	65	3	3	3	4	4	4	5	4	3	3	4	4	4	4	4	4	4	4	4	4	4	4	4	3	4
277	1	1	2504	61	1	2	2	1	3	2	0	0	1	1	0	0	1	1	50	161	19.2894	5	1	76	3	4	3	4	4	4	4	4	5	2	3	3	3	3	3	3	3	3	3	2	4	4	4	4	3
278	1	1	2520	45	1	2	2	2	5	2	0	0	1	1	0	0	1	1	65	165	23.8751	5	5	81	2	4	3	2	3	3	3	3	3	3	2	3	3	3	3	3	4	3	3	3	3	4	3	4	3
279	1	1	2517	48	1	2	1	1	2	2	0	0	1	1	0	0	2	1	88	167	31.5537	3	5	110	1	4	2	4	4	3	3	3	3	3	3	3	3	3	3	3	4	3	4	3	3	4	4	3	3
280	1	1	2509	56	1	5	6	4	#NULL!	2	0	0	1	0	0	0	1	1	67	169	23.4586	2	2	86	3	3	4	4	4	4	4	4	3	4	3	4	3	4	4	4	3	4	4	4	4	4	4	4	2
281	1	1	2506	59	2	2	2	3	5	2	1	0	1	1	0	0	1	1	73	165	26.8136	2	2	96	2	4	2	2	2	2	2	2	2	1	2	4	4	4	3	3	3	3	3	3	3	3	3	1	1
282	1	2	2525	40	1	5	2	2	#NULL!	2	0	0	1	1	0	0	1	1	57	150	25.3333	1	1	74	4	2	4	3	3	4	3	3	4	4	2	4	3	3	4	4	3	4	2	3	4	4	3	4	3
283	1	2	2507	58	1	2	2	1	10	2	0	0	1	1	0	0	2	1	45	150	20	1	5	73	3	4	4	3	3	3	3	3	4	4	3	4	3	3	3	3	3	4	3	4	4	4	4	4	4
284	1	2	2510	55	1	4	2	1	#NULL!	2	0	0	1	0	0	0	1	1	50	165	18.3655	1	5	79	2	4	4	4	4	4	5	3	3	4	3	3	4	5	5	5	4	5	1	4	4	3	5	3	3
285	1	2	2504	61	1	2	2	1	#NULL!	2	0	0	1	0	0	1	1	2	70	150	31.1111	1	1	104	1	4	3	5	5	4	4	4	3	4	3	5	4	4	5	4	5	5	1	5	5	4	5	4	5
286	1	2	2508	57	1	2	2	1	#NULL!	2	0	0	1	0	0	0	1	1	47	160	18.3594	5	1	70	3	4	3	2	2	2	2	4	3	3	3	2	3	3	3	4	4	4	4	3	4	4	3	3	4
287	1	2	2509	56	1	1	6	4	#NULL!	2	0	0	1	0	0	0	1	1	45	155	18.7305	1	1	70	3	5	4	4	4	5	4	4	5	4	2	4	4	5	4	4	4	4	5	5	5	4	4	5	5
288	1	1	2493	72	1	2	2	2	30	2	0	0	1	1	0	0	1	1	64	163	24.0882	3	3	70	3	4	4	5	3	3	3	3	2	4	1	4	4	3	3	3	2	3	3	3	3	4	4	4	2
289	1	1	2511	54	1	2	2	1	5	2	0	0	1	1	0	0	1	1	62	166	22.4996	5	5	75	3	2	4	4	4	4	4	4	3	4	2	4	3	3	4	4	3	4	4	4	4	4	4	4	4
290	1	1	2512	53	1	2	2	1	4	2	1	0	1	1	0	0	1	2	69	155	28.7201	2	5	81	3	3	4	5	4	4	4	4	4	4	3	4	4	3	3	3	2	3	3	3	3	4	4	4	4
291	1	1	2530	35	1	5	5	2	#NULL!	2	0	0	1	0	0	1	1	1	71	165	26.079	5	4	81	3	3	4	5	4	4	4	4	4	4	2	4	3	1	2	2	3	3	4	4	4	4	4	4	4
292	1	2	2497	68	1	2	2	7	#NULL!	2	0	0	1	1	0	0	1	1	48	155	19.9792	1	1	99	3	3	4	4	4	4	4	4	4	3	3	4	4	4	3	3	2	3	3	2	3	4	4	4	3
293	1	1	2507	58	1	2	2	1	#NULL!	2	0	0	1	0	0	0	1	1	63	170	21.7993	2	5	83	3	2	4	4	4	4	4	4	3	4	4	4	4	4	4	4	4	4	4	4	4	4	4	4	4
294	1	1	2511	54	1	2	4	3	#NULL!	2	0	0	1	0	0	0	1	1	68	163	25.5937	5	5	84	4	2	4	4	4	4	4	4	5	4	5	4	4	4	4	4	3	4	4	4	4	4	4	4	4
295	1	2	2501	64	1	2	2	1	#NULL!	2	0	0	1	0	0	0	1	1	51	150	22.6667	1	1	72	5	3	5	5	5	5	5	4	4	4	5	4	3	2	3	3	3	4	4	4	3	4	4	4	3
296	1	2	2509	56	1	5	2	1	1	2	0	0	1	1	0	0	1	1	60	145	28.5375	1	1	86	4	3	4	4	4	4	4	3	4	4	5	4	3	3	3	3	2	3	4	4	4	4	3	4	2
297	1	2	2515	50	1	2	2	3	#NULL!	2	0	0	1	0	0	1	1	1	65	170	22.4913	1	5	76	4	3	4	4	4	4	4	4	5	4	2	4	3	3	4	4	3	4	4	4	4	4	4	4	4
298	1	2	2500	65	2	2	2	1	10	2	0	0	1	1	0	1	1	2	61	159	24.1288	1	5	76	3	2	4	3	4	4	4	3	5	4	2	4	4	3	3	3	3	4	4	4	4	4	4	4	4
299	1	2	2517	48	2	3	4	7	#NULL!	2	0	0	1	0	0	0	1	1	79	160	30.8594	1	5	114	4	3	4	5	4	4	4	4	5	4	4	4	4	4	4	4	3	4	4	4	4	4	4	4	4
300	1	1	2516	49	1	2	2	1	#NULL!	2	0	0	1	0	0	0	1	1	73	170	25.2595	5	4	80	3	2	4	4	4	4	4	4	2	4	2	4	3	4	4	4	4	4	4	4	4	4	5	4	4
301	1	2	2517	48	1	2	2	1	9	2	0	0	1	1	0	1	1	1	62	145	29.4887	1	1	87	3	3	4	1	3	3	3	3	3	3	2	4	4	4	4	4	2	4	4	3	4	4	4	4	3
302	1	2	2537	28	2	5	4	2	#NULL!	2	0	0	1	0	0	0	1	1	43	156	17.6693	1	1	70	4	2	4	4	4	4	4	4	2	4	2	4	4	4	3	3	3	4	4	4	4	4	4	4	4
303	1	2	2494	71	1	4	2	6	1	2	0	0	1	1	0	0	1	1	50	153	21.3593	1	1	74	3	4	4	3	4	4	4	4	5	4	3	4	3	3	4	4	3	4	2	4	4	4	4	4	3
304	1	2	2505	60	1	2	2	1	10	2	0	1	1	1	0	0	2	1	80	143	39.1217	1	5	80	3	4	4	4	3	3	3	3	5	4	4	4	4	4	4	4	3	4	4	4	4	4	4	4	4
305	1	1	2513	52	1	2	2	1	2	2	0	0	1	1	0	0	1	1	67	160	26.1719	2	2	94	3	4	4	3	3	4	3	4	5	4	4	4	4	4	4	4	3	4	4	4	4	4	4	4	3
306	1	1	2498	67	1	2	3	1	#NULL!	2	0	0	1	0	0	0	1	1	78	164	29.0006	2	2	90	5	5	5	5	5	5	5	5	5	5	4	5	5	5	5	5	4	5	5	5	5	5	5	5	5
307	1	1	2502	63	1	2	2	1	#NULL!	2	0	0	1	0	0	0	1	1	47	158	18.8271	2	5	71	5	4	5	5	5	5	5	4	2	5	2	5	4	4	4	4	3	4	3	4	4	4	5	5	4
308	1	1	2502	63	1	2	2	1	6	2	0	0	1	1	0	0	1	1	76	163	28.6048	5	5	90	3	4	4	5	4	4	4	4	5	4	4	4	5	5	4	4	3	4	4	4	4	4	4	4	4
309	1	2	2506	59	1	5	4	7	24	2	0	0	1	1	0	1	1	1	58	156	23.833	2	3	79	3	3	4	2	3	4	4	4	4	4	3	4	3	3	4	4	4	5	5	5	3	4	4	3	3
310	1	1	2507	58	1	5	4	2	#NULL!	2	0	0	1	0	0	0	1	1	57	153	24.3496	5	5	78	4	2	5	4	4	4	4	4	4	5	3	5	5	5	4	4	4	5	4	4	4	5	5	5	5
311	1	2	2502	63	1	2	2	1	#NULL!	2	0	0	1	1	0	1	1	1	51	148	23.2834	1	1	82	5	2	5	4	4	4	5	4	5	5	5	5	4	4	4	4	3	5	4	5	4	5	5	5	4
312	1	1	2513	52	1	2	2	1	#NULL!	2	0	0	1	1	0	0	1	1	54	159	21.3599	1	5	75	4	3	5	5	4	4	4	3	5	4	4	4	5	4	4	4	4	5	2	4	4	5	5	5	4
313	1	2	2519	46	1	2	2	1	#NULL!	2	0	0	1	0	0	0	2	1	58	160	22.6562	1	2	75	4	4	4	4	4	4	4	4	3	4	3	4	4	4	4	4	4	4	4	4	4	4	4	4	4
314	1	2	2511	54	1	2	2	1	7	2	0	0	1	1	0	0	1	1	54	150	24	1	1	80	3	4	3	4	3	4	4	4	4	4	3	4	4	4	4	4	3	4	4	4	4	4	4	5	3
315	1	2	2499	66	1	2	2	8	3	2	1	0	1	1	0	0	1	1	43	150	19.1111	2	3	80	3	3	4	3	3	4	4	4	4	4	2	4	4	4	3	3	3	4	4	4	4	4	4	4	4
316	1	1	2498	67	1	2	2	1	#NULL!	2	0	1	1	0	0	0	1	1	55	165	20.202	4	1	81	3	4	2	2	3	4	3	3	3	3	2	3	2	2	4	4	2	4	1	3	3	4	4	3	5
317	1	2	2513	52	1	2	2	2	5	2	0	0	1	1	0	0	1	1	50	140	25.5102	1	2	80	3	3	3	3	2	3	2	3	2	3	2	4	4	4	4	4	4	4	4	4	4	4	4	4	4
318	1	2	2492	73	1	5	2	6	#NULL!	2	0	0	1	0	0	0	1	1	65	151	28.5075	1	1	86	4	3	4	4	4	4	4	4	3	5	2	3	4	4	4	4	3	4	4	4	4	3	4	3	1
319	1	1	2508	57	1	2	2	1	#NULL!	2	0	0	1	0	0	0	1	1	60	155	24.974	1	5	96	3	3	3	4	3	4	4	4	5	4	4	3	4	4	4	4	3	4	4	3	4	4	4	4	5
320	1	1	2501	64	1	2	2	1	#NULL!	2	0	0	1	0	0	0	1	1	67	165	24.6097	2	5	90	3	4	4	5	3	3	4	3	5	4	4	3	4	3	4	3	4	4	4	3	4	4	4	4	4
321	1	1	2491	74	1	2	2	1	#NULL!	2	0	0	1	0	0	1	1	1	56	160	21.875	1	1	80	4	4	4	2	4	4	4	4	5	4	3	4	4	4	4	4	3	4	3	4	4	4	4	4	5
322	1	1	2494	71	1	2	2	6	#NULL!	2	0	0	1	0	0	0	1	1	53	160	20.7031	1	1	83	4	5	3	4	4	4	3	4	5	4	4	4	4	3	4	4	4	3	4	4	4	3	4	2	5
323	1	1	2498	67	1	2	2	1	20	2	0	0	1	1	0	0	1	1	60	168	21.2585	5	5	101	3	2	4	4	3	3	4	3	3	3	2	3	4	4	3	4	3	3	2	3	4	3	3	4	5
324	1	1	2496	69	1	2	2	1	#NULL!	2	0	0	1	0	0	0	1	1	55	165	20.202	1	5	81	4	3	2	2	3	3	3	3	4	3	2	2	3	3	2	2	3	3	4	3	3	3	3	3	3
325	1	1	2507	58	1	2	2	4	#NULL!	2	0	0	1	0	0	0	2	1	65	165	23.8751	5	1	90	4	3	4	4	4	4	3	3	4	3	4	3	3	3	3	4	3	4	4	4	4	4	4	4	4
326	1	1	2517	48	1	2	5	1	#NULL!	2	0	0	1	0	1	0	1	1	70	170	24.2215	5	5	80	3	5	3	1	3	3	3	3	5	4	4	3	4	4	4	4	3	4	5	4	4	4	3	5	5
327	1	1	2508	57	1	2	2	1	#NULL!	2	0	0	1	0	0	0	1	1	70	159	27.6888	1	5	90	3	4	3	3	3	3	3	3	5	3	4	3	3	3	4	4	4	4	5	4	4	4	4	4	4
328	1	1	2504	61	1	2	2	1	#NULL!	2	0	0	1	0	0	0	1	1	65	176	20.984	1	5	93	3	4	3	3	3	3	3	3	3	3	3	3	3	3	3	5	2	3	3	4	3	4	4	4	4
329	1	1	2501	64	1	2	2	1	#NULL!	2	0	0	1	0	0	0	1	1	40	159	15.8222	5	4	70	4	5	4	5	4	4	4	4	5	4	2	4	4	4	4	4	4	5	4	4	4	4	4	4	4
330	1	2	2511	54	1	2	2	1	4	2	0	0	1	1	0	0	1	1	38	150	16.8889	1	1	70	3	3	4	3	3	4	4	4	3	4	3	3	3	4	4	4	4	3	3	3	3	3	4	4	4
331	1	1	2498	67	1	2	2	1	#NULL!	2	0	0	1	0	0	0	1	1	56	160	21.875	5	4	72	4	3	4	2	4	4	4	4	4	4	2	4	3	4	4	4	1	4	5	4	4	4	4	4	4
332	1	1	2506	59	1	2	2	3	#NULL!	2	0	0	1	0	0	0	1	1	60	173	20.0474	5	5	80	4	4	4	4	4	4	4	4	4	4	3	4	4	3	3	4	4	4	1	4	4	4	4	4	4
333	1	1	2490	75	1	2	2	1	#NULL!	2	0	1	1	0	0	0	1	1	50	168	17.7154	5	5	90	3	3	4	3	4	4	4	4	5	4	4	3	4	4	4	3	3	3	4	4	3	3	3	3	3
334	1	1	2502	63	1	3	4	4	#NULL!	2	0	0	1	0	0	0	1	1	64	162	24.3865	4	4	80	4	3	3	4	4	4	4	4	5	4	4	3	3	3	4	4	2	3	4	3	3	3	2	2	2
335	1	2	2499	66	1	2	2	1	#NULL!	2	0	0	1	0	0	0	1	1	45	150	20	1	1	68	4	4	4	1	4	3	3	4	2	5	5	5	2	2	2	5	5	3	5	3	3	4	4	2	5
336	1	1	2502	63	1	2	7	4	#NULL!	2	0	0	1	0	0	0	1	1	54	165	19.8347	4	4	69	4	3	4	4	4	4	4	4	1	4	1	4	4	4	4	4	3	5	4	3	5	5	5	5	5
337	1	1	2512	53	1	2	2	1	#NULL!	2	0	0	1	0	0	0	1	1	50	170	17.301	5	5	74	4	5	4	3	4	4	4	4	4	4	4	3	3	4	4	4	2	3	5	5	4	4	4	4	5
338	1	1	2508	57	1	2	5	2	#NULL!	2	0	0	1	0	0	0	1	1	57	162	21.7193	5	5	76	5	4	4	4	3	4	3	3	3	4	4	4	4	4	4	4	4	4	5	5	5	5	5	5	4
339	1	1	2499	66	1	2	7	4	15	2	0	0	1	1	0	0	1	1	44	160	17.1875	1	1	81	4	5	4	3	4	4	4	4	3	5	2	3	3	4	4	4	5	3	3	4	4	2	5	1	4
340	1	1	2490	75	1	2	2	4	20	2	1	0	1	1	0	0	1	1	67	170	23.1834	4	4	81	3	4	3	4	3	3	3	3	3	4	5	4	4	4	4	4	2	4	5	3	4	4	4	4	5
341	1	2	2492	73	1	2	2	1	40	2	0	0	1	1	0	0	1	1	48	155	19.9792	1	1	83	4	2	2	2	3	2	2	3	3	3	2	3	3	2	4	4	3	3	5	4	4	3	3	4	4
342	1	1	2504	61	1	2	2	1	10	2	1	0	1	1	0	0	1	1	42	155	17.4818	4	4	73	4	3	2	5	4	4	3	3	4	3	4	3	4	4	4	5	4	3	3	5	4	4	4	3	4
343	1	1	2512	53	1	2	2	3	3	2	0	0	1	1	0	0	1	1	75	169	26.2596	1	4	91	4	3	2	2	4	4	3	5	3	4	2	2	4	3	5	5	3	4	3	5	4	4	5	1	4
344	1	2	2512	53	1	2	2	2	#NULL!	2	0	0	1	1	0	0	1	1	55	150	24.4444	5	1	78	5	4	2	3	2	2	2	2	4	2	3	2	3	4	3	3	4	4	5	3	4	5	3	5	2
345	1	1	2500	65	1	2	2	6	#NULL!	2	0	0	1	0	0	0	1	1	50	174	16.5147	5	4	80	4	2	4	4	4	4	4	4	5	4	2	4	4	4	4	3	4	4	4	4	4	5	4	4	5
346	1	2	2497	68	1	4	2	1	#NULL!	2	0	0	1	0	0	0	1	1	75	155	31.2175	1	1	93	2	3	2	1	2	3	2	3	5	4	3	5	4	4	5	5	3	4	5	2	3	4	3	3	4
347	1	2	2490	75	1	2	2	6	20	2	0	0	1	1	0	0	1	1	70	175	22.8571	1	1	86	4	3	4	5	4	5	4	4	5	4	3	4	4	4	5	5	4	3	5	4	4	5	5	5	4
348	1	2	2535	30	1	5	6	2	#NULL!	2	0	0	1	0	0	0	1	1	60	151	26.3146	1	5	76	4	4	2	1	2	3	2	3	5	3	2	5	5	5	5	5	3	5	5	5	5	5	5	5	5
349	1	1	2502	63	1	2	2	3	14	2	0	0	1	1	0	0	1	1	45	158	18.026	1	4	82	4	5	5	3	4	4	4	4	4	4	3	4	3	4	5	5	5	4	1	5	5	5	4	5	5
350	1	2	2497	68	1	4	2	1	#NULL!	2	0	0	1	0	0	0	1	1	50	140	25.5102	1	1	78	5	4	3	5	3	3	4	4	5	5	4	3	3	4	4	5	3	5	2	3	4	5	3	4	3
351	1	2	2514	51	1	2	4	6	#NULL!	2	0	0	1	0	0	1	1	1	103	187	29.4547	1	5	109	3	3	3	2	3	4	4	3	3	4	3	3	3	3	4	4	5	3	5	2	3	5	5	5	3
352	1	2	2497	68	1	2	2	1	10	2	0	0	1	1	0	0	1	1	50	150	22.2222	1	1	81	3	2	2	2	3	3	3	3	5	2	4	3	3	3	4	4	4	3	3	4	3	4	3	3	4
353	1	1	2514	51	1	2	2	1	#NULL!	2	0	0	1	0	0	0	1	1	76	156	31.2295	1	1	91	3	4	4	3	3	4	4	4	4	3	4	3	4	3	4	4	5	3	3	4	4	3	3	3	4
354	1	2	2492	73	1	4	2	6	#NULL!	2	0	0	1	0	0	0	1	1	50	163	18.8189	1	1	86	3	1	2	2	4	4	4	4	5	4	3	3	3	3	4	4	4	3	5	3	3	3	4	4	1
355	1	1	2495	70	1	2	2	1	#NULL!	2	0	0	1	0	0	0	1	1	45	150	20	4	4	76	2	2	4	2	3	3	4	4	2	3	3	3	4	4	4	4	3	4	4	3	4	5	5	5	4
356	1	2	2494	71	1	2	2	1	20	2	0	0	1	1	0	0	1	1	60	160	23.4375	1	1	81	4	2	4	4	4	4	4	4	2	4	3	4	4	5	4	4	4	5	4	5	4	4	5	4	4
357	1	1	2515	50	1	2	3	1	#NULL!	2	0	0	1	0	0	0	1	1	80	172	27.0416	1	5	91	4	4	4	5	3	3	4	5	5	5	4	4	4	5	4	4	5	4	4	5	5	5	5	5	5
358	1	1	2498	67	1	2	3	1	4	2	0	0	1	1	0	0	1	1	47	150	20.8889	1	2	78	1	4	3	3	4	3	4	4	5	4	4	2	4	4	3	5	3	4	4	3	5	3	5	2	3
359	1	2	2500	65	1	2	2	1	25	2	0	0	1	1	0	0	1	1	53	150	23.5556	1	1	86	3	5	3	1	3	4	4	3	5	4	4	2	3	3	4	3	3	5	1	4	3	4	3	4	4
360	1	2	2501	64	1	2	2	6	10	2	0	0	1	0	0	0	1	1	64	150	28.4444	1	1	96	3	2	3	2	3	3	3	3	3	4	2	3	3	3	4	4	3	4	2	3	2	3	3	3	3
361	1	2	2502	63	1	2	2	1	40	2	0	0	1	1	0	0	1	1	60	165	22.0386	1	1	96	2	2	3	1	3	3	2	3	4	2	5	3	3	2	2	3	4	3	1	3	4	3	4	4	4
362	1	2	2493	72	1	2	2	6	40	2	0	1	1	0	0	0	2	1	45	160	17.5781	1	1	73	3	4	1	1	3	3	4	4	3	3	4	3	4	4	3	3	1	4	5	4	3	4	4	3	4
363	1	1	2512	53	1	1	2	2	1	2	0	0	1	1	0	0	1	1	57	176	18.4013	5	5	73	4	5	4	5	4	4	3	4	5	4	4	4	4	4	5	4	3	4	4	4	5	4	4	5	5
364	1	2	2519	46	1	3	2	1	14	2	0	0	1	1	0	0	1	1	49	149	22.0711	1	5	76	4	1	4	5	3	4	4	4	1	3	3	4	4	3	4	4	2	4	5	4	4	5	4	4	4
365	1	2	2503	62	1	4	2	1	5	2	0	0	1	1	0	0	1	1	55	150	24.4444	1	5	86	3	3	4	3	4	4	4	4	2	3	4	4	4	4	4	4	3	5	4	4	4	3	4	4	4
366	1	1	2512	53	1	2	3	2	#NULL!	2	0	0	1	0	0	0	1	1	60	170	20.7612	1	5	99	4	5	4	4	4	5	5	5	5	4	4	4	4	4	5	5	4	4	5	4	4	4	4	4	4
367	1	2	2509	56	1	4	1	6	5	2	0	0	1	1	0	1	1	1	70	165	25.7117	1	1	101	2	5	2	5	3	2	3	3	5	3	5	3	3	4	4	4	4	5	5	3	4	5	3	2	3
368	1	1	2490	75	1	2	4	1	#NULL!	2	0	0	1	0	0	0	1	1	65	160	25.3906	4	4	86	4	4	4	5	4	4	4	3	3	3	3	3	4	3	3	4	3	4	5	3	4	4	4	3	4
369	1	2	2510	55	1	4	2	1	#NULL!	2	0	0	1	0	0	1	2	1	63	140	32.1429	1	1	86	2	3	2	2	2	3	3	2	2	2	2	2	2	3	2	3	3	2	1	3	3	3	2	3	3
370	1	1	2502	63	1	2	3	1	2	2	0	0	1	0	0	0	1	1	60	156	24.6548	4	4	83	4	4	4	3	4	3	3	4	4	3	1	3	4	3	4	4	1	4	5	4	3	4	4	4	4
371	1	1	2513	52	1	2	6	3	#NULL!	2	0	0	1	0	0	0	1	1	65	165	23.8751	5	5	76	4	3	5	5	4	4	4	4	5	2	2	4	3	4	4	4	5	4	5	3	4	5	5	5	4
372	1	2	2507	58	1	2	2	1	1	2	0	0	1	1	0	1	1	1	70	175	22.8571	1	1	76	3	5	4	1	5	4	3	3	1	3	3	3	4	3	4	3	2	4	3	3	4	5	4	5	3
373	1	2	2496	69	1	4	2	6	19	2	0	0	1	0	0	0	1	1	50	160	19.5312	1	1	91	4	4	3	2	3	3	3	3	4	3	3	4	3	3	2	3	3	3	4	3	3	3	4	4	4
374	1	1	2500	65	1	2	6	4	#NULL!	2	0	0	1	0	0	0	1	1	70	165	25.7117	5	5	86	4	3	3	4	4	4	4	3	2	3	2	4	5	4	3	5	5	4	4	3	4	5	5	5	5
375	1	1	2503	62	1	2	2	6	16	2	0	0	1	0	0	0	1	2	58	160	22.6562	1	5	91	4	3	3	1	2	3	2	2	2	2	3	4	3	4	3	3	2	4	2	2	2	2	2	1	2
376	1	2	2523	42	2	2	2	2	4	2	0	0	1	1	0	0	1	1	53	140	27.0408	1	1	81	4	3	4	3	3	4	4	3	5	3	2	4	3	4	3	4	4	4	3	4	4	3	4	4	4
377	1	1	2502	63	1	2	2	1	#NULL!	2	0	0	1	0	0	0	1	1	45	155	18.7305	5	5	85	4	3	4	5	4	3	4	4	5	2	5	4	4	3	3	4	5	4	3	2	2	4	4	4	4
479	1	1	2502	63	1	2	5	1	#NULL!	2	0	0	1	0	0	0	1	1	67	170	23.1834	1	1	97	4	3	3	5	3	4	4	4	3	3	3	4	3	3	3	3	3	3	4	4	4	4	4	3	4
531	1	2	2539	26	1	1	3	6	#NULL!	2	0	0	1	0	0	0	1	1	82	167	29.4023	1	1	101	3	5	3	3	3	3	3	3	5	3	5	2	2	3	2	2	3	2	2	3	3	3	3	3	3
532	1	1	2518	47	1	2	2	1	4	2	0	0	1	1	0	0	1	1	65	160	25.3906	5	1	81	4	2	4	4	3	3	4	4	5	3	3	4	4	4	5	4	4	4	4	5	5	4	4	4	4
533	1	1	2494	71	1	2	2	3	#NULL!	2	0	0	1	0	0	0	1	1	71	168	25.1559	1	5	91	3	2	3	2	3	3	3	3	3	3	3	3	3	3	3	3	5	4	5	5	5	4	4	4	5
534	1	1	2516	49	1	2	3	1	#NULL!	2	1	0	1	0	0	0	1	1	73	171	24.9649	1	1	91	3	5	3	4	4	4	4	4	4	4	5	4	4	3	4	4	3	4	3	3	4	4	3	4	4
535	1	2	2493	72	1	5	2	6	#NULL!	2	0	0	1	0	0	0	1	1	45	140	22.9592	1	1	81	2	5	1	4	2	2	2	2	5	2	4	2	3	2	3	3	2	2	3	2	2	2	2	2	3
536	1	2	2502	63	1	2	2	6	12	2	0	0	1	0	0	0	1	1	65	160	25.3906	1	1	81	4	3	3	4	4	3	3	4	4	4	2	3	4	3	3	4	4	4	4	3	4	4	4	3	4
537	1	1	2506	59	1	2	6	4	#NULL!	2	0	0	1	0	0	0	1	1	86	173	28.7347	1	1	90	4	5	2	4	4	3	3	3	5	4	5	3	4	3	3	4	5	4	5	4	3	3	4	4	4
538	1	1	2495	70	1	4	2	6	#NULL!	2	0	0	1	0	0	0	1	1	65	170	22.4913	5	1	86	4	3	4	1	3	4	4	4	5	3	5	3	3	4	4	4	2	3	4	3	3	4	4	4	4
539	1	2	2517	48	1	2	2	1	10	2	0	0	1	0	0	0	1	1	65	160	25.3906	1	1	86	3	3	3	1	3	3	3	3	5	3	5	3	3	3	3	4	4	4	5	3	3	3	4	4	4
540	1	1	2506	59	1	2	4	2	#NULL!	2	0	0	1	0	0	0	1	1	55	160	21.4844	5	1	81	4	2	4	4	4	4	4	4	5	4	4	4	4	4	3	4	3	4	5	3	4	3	3	3	4
541	1	1	2521	44	1	2	3	4	#NULL!	2	0	0	1	0	0	0	1	1	53	158	21.2306	5	1	81	3	5	3	2	3	3	3	3	4	3	5	3	3	3	3	3	2	3	4	3	3	3	3	4	4
542	1	1	2512	53	1	2	2	2	#NULL!	2	0	0	1	0	0	0	1	1	63	167	22.5896	1	5	91	3	3	3	1	2	2	2	2	3	3	3	3	3	3	3	3	2	3	4	2	2	2	2	3	3
543	1	1	2512	53	1	2	4	2	#NULL!	2	0	0	1	0	0	0	1	1	72	171	24.623	5	5	96	4	3	4	5	4	4	4	4	4	4	5	4	4	4	4	4	4	3	3	4	4	5	5	4	4
544	1	1	2499	66	1	2	2	1	4	2	0	0	1	0	0	0	1	1	70	168	24.8016	5	1	91	3	2	3	2	3	3	3	3	5	3	4	4	4	2	3	2	2	2	4	2	2	1	1	1	3
545	1	1	2514	51	1	2	2	3	#NULL!	2	0	0	1	0	0	0	1	1	58	160	22.6562	5	5	81	4	2	4	5	4	4	4	4	4	4	2	4	4	4	4	4	4	4	3	3	4	4	4	4	4
546	1	1	2539	26	1	2	3	2	#NULL!	2	0	0	1	0	0	0	1	1	58	170	20.0692	5	1	81	4	4	4	4	4	5	5	5	5	4	3	4	4	3	4	4	4	3	2	3	3	3	4	3	3
547	1	2	2522	43	1	2	2	1	#NULL!	2	0	0	1	0	0	0	1	1	84	155	34.9636	1	1	109	4	1	3	4	4	4	4	3	2	3	1	4	3	4	3	4	4	4	5	4	3	4	4	4	4
548	1	1	2511	54	1	2	2	2	#NULL!	2	0	0	1	0	0	0	1	1	58	165	21.3039	5	5	91	5	5	4	4	4	3	3	4	5	4	5	4	4	3	4	3	3	4	4	4	4	4	4	4	4
549	1	2	2534	31	1	2	4	2	#NULL!	2	0	0	1	0	0	0	1	1	64	152	27.7008	1	1	86	5	3	4	5	4	4	4	4	2	4	2	5	5	5	5	5	5	5	5	5	5	5	5	5	5
550	1	1	2505	60	1	2	4	3	3	2	0	0	1	1	0	0	1	1	52	165	19.1001	5	5	75	2	3	4	1	3	3	3	2	4	3	5	3	3	3	3	3	3	4	5	3	4	4	4	4	4
551	1	1	2514	51	1	5	6	4	3	2	0	0	1	1	0	0	2	1	75	170	25.9516	5	5	101	4	4	4	3	4	4	4	3	5	4	3	4	4	4	3	4	4	4	3	4	4	4	4	5	4
552	1	2	2514	51	1	2	2	1	1	2	0	0	1	1	0	0	1	1	37	145	17.5981	5	5	80	3	3	3	3	3	3	3	3	2	3	2	2	3	2	3	3	3	3	2	3	3	3	2	3	4
553	1	2	2517	48	1	2	2	7	#NULL!	2	0	0	1	0	0	0	1	1	59	150	26.2222	1	1	77	4	2	4	4	4	4	4	4	2	4	2	4	4	5	4	5	4	2	3	3	3	3	3	2	3
554	1	1	2490	75	1	4	2	6	5	2	0	0	1	1	0	1	1	1	75	155	31.2175	1	1	83	5	3	4	5	4	4	4	4	3	4	3	5	4	4	4	5	5	4	5	4	3	3	4	4	3
555	1	1	2544	21	1	1	4	2	#NULL!	2	0	0	1	0	0	0	1	1	65	170	22.4913	1	1	86	4	3	4	5	5	4	4	4	3	4	3	5	5	5	5	5	5	5	5	4	5	5	4	4	4
556	1	2	2506	59	1	2	1	6	8	2	0	0	1	1	0	0	2	1	45	150	20	1	1	85	4	3	2	1	3	3	3	3	3	4	4	4	3	4	3	3	3	4	4	3	3	4	4	4	4
696	1	1	2502	63	1	2	2	6	#NULL!	2	0	0	1	0	0	1	1	1	46	155	19.1467	4	4	95	3	5	3	3	3	3	3	3	3	3	4	4	3	3	4	3	4	3	4	3	4	3	3	3	3
697	1	1	2491	74	1	2	2	3	#NULL!	2	0	0	1	0	0	0	1	1	51	170	17.6471	5	5	81	4	4	3	3	4	4	4	4	5	3	4	4	4	3	3	4	3	3	3	4	4	3	3	3	4
698	1	1	2501	64	1	2	2	6	#NULL!	2	0	0	1	0	0	0	1	1	65	162	24.7676	5	1	82	4	4	4	4	4	4	4	4	5	4	5	3	3	3	4	3	3	3	4	3	3	3	3	3	3
699	1	1	2524	41	1	5	5	6	#NULL!	2	0	0	1	0	0	0	2	1	65	170	22.4913	1	1	93	3	4	4	3	3	3	3	3	4	3	4	3	3	3	3	3	3	4	3	3	3	4	4	3	4
700	1	2	2520	45	1	2	2	1	4	2	0	0	1	1	0	0	1	1	65	155	27.0552	1	1	90	4	2	4	2	3	3	3	3	5	4	4	3	4	3	3	3	4	5	5	3	4	5	4	5	4
701	1	1	2500	65	1	2	2	1	#NULL!	2	0	1	1	0	0	0	1	1	45	165	16.5289	1	1	80	4	4	4	5	3	4	4	4	4	4	4	3	3	4	3	3	3	3	4	4	3	5	4	5	4
702	1	1	2494	71	1	2	2	1	#NULL!	2	0	0	1	0	0	0	1	1	67	170	23.1834	5	1	80	4	3	4	5	4	4	4	4	4	3	2	4	4	3	4	4	3	4	4	3	4	4	5	5	5
703	1	1	2525	40	1	2	3	1	#NULL!	2	0	1	1	0	0	0	1	1	65	171	22.2291	4	1	75	4	4	3	4	5	5	5	5	5	4	5	4	4	4	3	3	4	4	3	4	4	3	4	5	5
704	1	1	2496	69	1	2	2	6	#NULL!	2	0	0	1	0	0	0	1	1	70	165	25.7117	1	1	105	4	3	3	4	3	4	4	4	4	3	3	4	3	3	4	3	3	4	4	4	4	3	3	3	3
705	1	2	2510	55	1	2	2	6	#NULL!	2	0	0	1	0	0	0	1	1	50	165	18.3655	1	1	80	4	3	3	2	4	3	3	3	4	3	4	3	3	4	3	3	4	4	4	4	3	3	4	4	4
706	1	1	2492	73	1	2	2	1	6	2	0	0	1	1	0	0	1	1	65	150	28.8889	1	1	103	4	4	3	4	3	3	4	3	5	4	5	3	4	3	4	3	3	4	3	3	4	4	4	4	4
707	1	2	2516	49	1	2	2	1	10	2	0	1	1	1	0	0	1	1	42	155	17.4818	1	1	75	3	4	3	4	4	3	3	3	5	4	5	4	3	3	4	3	3	4	4	3	3	3	3	3	4
708	1	2	2493	72	1	4	2	6	9	2	0	0	1	1	0	0	1	1	105	150	46.6667	1	1	110	4	2	3	3	4	3	3	3	3	3	3	4	3	3	4	3	4	3	4	4	4	3	4	4	4
1	2	1	2491	74	1	2	2	1	15	2	0	0	0	1	0	1	2	1	77	173	25.7276	2	5	92	4	3	4	5	4	4	4	4	4	4	4	4	4	4	4	4	4	5	5	5	5	4	4	5	4
2	2	1	2491	74	1	2	2	1	3	2	0	0	0	1	0	1	2	1	66	165	24.2424	2	2	91	3	5	3	4	4	4	4	4	4	3	3	3	4	4	4	3	3	3	3	4	4	3	4	3	2
3	2	1	2497	68	1	2	2	1	5	2	0	0	0	1	0	0	1	1	67	167	24.0238	3	1	75	4	2	3	4	4	4	4	4	4	4	3	3	4	4	4	4	4	4	4	4	3	3	4	4	4
4	2	1	2495	70	1	2	2	2	14	2	0	0	0	1	0	1	1	1	50	165	18.3655	1	1	80	3	4	3	4	4	2	4	4	4	4	5	3	2	4	4	4	3	4	4	4	4	4	5	5	2
5	2	1	2493	72	1	4	2	1	7	2	0	0	0	1	0	0	1	1	60	160	23.4375	3	1	89	4	1	3	3	4	2	4	4	5	4	3	2	5	4	3	4	5	4	4	4	4	4	4	5	3
6	2	1	2494	71	1	2	2	1	10	2	0	0	0	1	0	0	2	1	50	160	19.5312	2	5	84	3	4	3	2	3	3	3	4	3	3	4	3	3	3	3	4	3	3	3	3	4	4	4	3	3
7	2	1	2495	70	1	2	2	1	10	2	0	0	0	1	0	0	2	1	72	165	26.4463	2	5	80	3	3	3	2	2	2	3	4	3	3	2	3	3	3	3	4	3	3	3	3	4	4	4	3	3
8	2	1	2516	49	1	2	5	1	5	2	0	0	0	1	0	0	1	1	73	170	25.2595	1	5	81	4	4	3	4	3	4	4	4	5	4	4	4	4	4	4	4	4	3	4	4	4	4	4	4	4
9	2	2	2517	48	1	2	2	1	13	2	0	0	0	1	0	0	1	1	52	158	20.83	1	2	84	3	2	2	2	4	4	4	4	3	4	2	4	4	5	5	5	4	4	4	4	4	4	4	5	4
10	2	1	2520	45	1	2	4	1	3	2	0	0	0	1	0	0	1	1	57	165	20.9366	1	5	78	4	5	4	3	4	4	4	4	5	4	5	4	4	4	5	4	4	3	5	4	4	2	4	5	4
11	2	1	2521	44	1	1	5	2	3	2	0	0	0	1	0	0	1	1	100	165	36.7309	1	5	120	2	3	4	3	3	3	3	3	5	3	2	4	4	3	3	4	3	4	4	4	3	3	4	4	4
12	2	1	2518	47	1	1	2	1	7	2	0	0	0	1	0	0	1	1	58	160	22.6562	5	5	76	5	2	5	5	5	5	4	4	5	5	3	4	4	4	4	4	3	4	5	5	5	5	5	5	5
13	2	2	2499	66	1	2	2	1	19	2	0	0	0	1	0	1	1	1	50	154	21.0828	1	1	91	3	3	3	4	3	4	3	4	5	3	3	4	4	4	3	4	3	4	4	3	4	4	4	4	3
14	2	2	2495	70	1	4	2	1	13	2	0	0	0	1	0	0	1	1	48	154	20.2395	1	1	71	3	5	3	4	4	4	4	4	2	4	4	4	4	4	4	4	3	4	4	4	4	3	3	4	3
15	2	2	2495	70	1	2	2	1	17	2	0	0	0	1	0	0	1	1	68	153	29.0487	1	1	89	1	4	3	5	4	4	3	5	3	4	4	4	4	5	4	4	3	5	4	4	4	3	4	2	3
16	2	2	2496	69	1	2	2	1	17	2	0	1	0	0	0	1	1	1	50	140	25.5102	1	1	95	3	5	3	4	5	5	5	5	3	4	4	4	4	4	4	3	3	4	4	4	4	3	4	4	1
17	2	2	2496	69	1	2	2	6	6	2	0	0	0	1	0	1	1	1	49	140	25	1	5	98	4	5	4	5	4	4	4	5	5	5	5	4	4	4	4	2	3	4	4	3	4	4	5	5	1
18	2	2	2496	69	1	2	2	1	7	2	0	0	0	1	0	0	1	1	53	145	25.2081	1	1	89	3	2	5	3	5	5	5	5	2	5	2	5	5	5	5	5	4	5	5	5	5	5	5	5	1
19	2	2	2500	65	1	4	3	1	7	2	0	0	0	1	0	0	1	1	64	150	28.4444	1	1	94	3	4	3	5	4	4	4	4	3	3	4	4	3	3	4	4	3	4	3	5	4	4	4	5	2
20	2	1	2496	69	1	2	2	1	10	2	0	0	0	1	0	0	2	1	59	165	21.6713	5	1	87	4	4	4	4	4	4	4	4	4	4	4	4	4	4	4	4	3	5	4	4	4	4	4	4	4
21	2	1	2496	69	1	1	4	1	3	2	0	0	0	1	0	1	1	1	90	186	26.0146	1	1	108	3	3	3	3	3	3	3	3	5	3	3	2	4	4	3	3	1	5	4	3	3	4	4	4	4
22	2	1	2498	67	1	2	2	1	7	2	0	0	0	1	0	0	1	1	74	170	25.6055	1	1	103	5	5	5	5	5	5	5	4	5	5	3	5	5	5	5	5	3	5	4	4	5	5	5	5	4
23	2	1	2498	67	1	2	2	1	4	2	0	0	0	1	0	0	1	1	65	166	23.5883	1	1	92	4	3	3	5	5	3	5	4	3	4	2	4	4	4	4	4	4	5	4	4	4	2	4	3	4
24	2	1	2501	64	1	2	2	1	4	2	0	0	0	1	0	0	1	1	85	170	29.4118	1	2	105	1	3	2	4	3	3	3	3	3	4	3	3	3	3	4	4	4	3	3	3	3	4	4	4	3
25	2	1	2498	67	1	4	2	2	15	2	0	0	0	1	0	0	1	1	73	175	23.8367	2	5	100	3	3	4	5	5	4	4	4	4	4	4	5	5	5	4	4	3	4	4	4	4	4	4	4	4
26	2	2	2511	54	1	2	3	1	6	2	0	0	0	1	0	0	1	2	71	150	31.5556	1	1	96	4	4	4	3	4	4	5	4	4	1	4	3	4	3	4	5	4	3	4	3	4	4	4	3	3
27	2	2	2507	58	1	4	2	1	10	2	0	0	0	1	0	0	1	1	60	151	26.3146	1	1	98	2	5	5	5	5	5	4	5	4	5	4	5	5	3	5	5	4	5	5	4	5	5	5	1	1
28	2	2	2509	56	1	1	4	1	6	2	0	0	0	1	0	0	1	1	54	153	23.0681	1	1	83	4	5	5	5	4	4	5	4	3	5	3	5	4	5	5	5	5	5	3	3	5	5	5	5	1
29	2	2	2515	50	1	2	4	1	2	2	0	0	0	1	0	0	1	1	64	150	28.4444	1	1	99	2	5	1	2	2	2	2	2	4	2	4	3	3	4	3	3	2	3	3	3	3	3	3	3	2
30	2	2	2510	55	1	1	2	7	10	2	0	0	0	1	0	1	1	1	57	154	24.0344	1	2	85	4	4	4	4	3	4	4	4	4	4	5	4	3	3	3	3	3	4	4	4	4	4	4	4	3
31	2	2	2515	50	1	4	4	1	1	2	0	0	0	1	0	0	1	1	72	156	29.5858	1	1	93	2	4	4	4	4	4	4	5	5	4	4	4	4	4	4	4	4	3	4	4	4	4	4	4	4
32	2	2	2509	56	1	2	3	1	11	2	0	0	0	1	0	0	1	1	51	153	21.7865	1	1	76	4	4	4	4	4	4	4	4	5	4	5	4	4	4	4	4	4	4	3	4	4	4	4	4	4
33	2	2	2511	54	1	2	4	1	13	2	0	0	0	1	0	0	1	1	54	159	21.3599	1	1	83	3	5	5	5	5	5	5	5	5	5	5	5	5	3	4	4	3	2	4	4	4	5	5	5	3
34	2	2	2509	56	1	2	2	1	15	2	0	0	0	1	0	0	1	1	75	150	33.3333	1	1	95	4	4	3	4	4	4	4	4	5	4	5	4	3	4	4	4	4	3	3	4	4	3	4	5	5
35	2	2	2522	43	1	2	2	1	3	2	0	0	0	1	0	1	1	1	69	152	29.865	1	1	102	3	4	4	4	3	4	3	4	5	3	4	4	5	3	3	4	3	3	2	4	4	4	5	5	1
36	2	2	2503	62	1	4	2	1	3	2	0	0	0	1	0	0	1	1	48	147	22.213	1	1	90	4	5	4	4	4	4	4	4	5	4	5	4	4	4	4	4	4	4	4	4	4	3	4	4	3
37	2	1	2502	63	1	1	2	1	2	2	0	1	0	1	0	0	1	1	35	155	14.5682	1	1	65	2	5	2	5	5	5	5	5	4	5	3	5	5	5	5	5	4	5	5	4	4	1	1	1	3
38	2	2	2501	64	1	4	2	1	15	2	0	1	0	1	0	0	1	1	60	156	24.6548	1	1	89	5	4	3	3	3	4	4	4	2	4	3	4	4	3	4	4	4	3	3	1	3	4	1	4	1
39	2	2	2504	61	1	2	2	2	3	2	0	0	0	1	0	0	1	1	61	160	23.8281	1	1	83	4	5	4	4	4	4	4	4	5	4	5	4	4	3	4	4	3	4	4	4	4	4	4	4	3
40	2	2	2504	61	1	4	2	1	8	2	0	0	0	1	0	0	1	1	85	160	33.2031	1	5	117	3	4	4	4	4	4	4	4	4	4	4	4	5	5	4	4	4	4	4	4	4	4	4	4	4
41	2	2	2502	63	1	1	1	1	10	2	0	0	0	1	0	0	1	1	54	159	21.3599	1	1	97	3	5	3	3	3	3	3	3	4	4	3	3	3	3	3	3	3	3	3	4	4	3	4	4	2
42	2	2	2494	71	1	4	2	1	13	2	0	0	0	1	0	0	1	1	48	145	22.83	1	1	100	5	5	4	5	5	5	5	5	5	4	5	4	4	4	4	3	2	4	4	4	3	4	5	4	3
43	2	2	2503	62	1	2	2	6	3	2	0	0	0	1	0	0	1	2	63	150	28	1	1	103	4	5	2	4	3	2	4	4	5	4	5	4	4	4	4	4	2	5	4	4	4	3	3	4	3
44	2	1	2494	71	1	1	2	1	3	2	0	0	0	1	0	0	1	1	44	145	20.9275	1	1	77	4	5	4	5	5	5	4	4	5	4	5	5	5	5	5	5	5	5	4	2	5	5	5	5	1
45	2	1	2503	62	1	2	2	1	4	2	0	0	0	1	0	0	1	1	64	159	25.3155	1	1	90	5	5	3	5	3	5	4	4	5	4	4	4	3	4	5	5	4	5	3	5	5	5	5	5	3
46	2	1	2503	62	1	2	4	1	6	2	0	0	0	1	0	0	1	1	80	173	26.7299	1	1	92	4	3	3	4	4	4	4	4	3	4	4	3	4	4	4	4	3	4	4	4	4	5	4	5	3
47	2	1	2501	64	1	2	2	1	20	2	0	0	0	1	0	0	1	1	63	160	24.6094	1	1	84	5	5	3	5	5	5	5	5	5	4	5	5	4	3	4	5	5	3	4	5	3	3	4	5	3
48	2	1	2504	61	1	2	2	1	5	2	0	0	0	1	0	0	1	1	63	161	24.3046	5	5	89	4	4	4	4	4	3	4	4	5	3	4	3	4	4	4	4	3	4	4	2	4	4	4	4	4
49	2	1	2507	58	1	2	3	1	18	2	0	0	0	1	0	0	1	1	62	175	20.2449	1	1	73	4	5	4	4	4	4	4	4	5	4	4	3	4	4	4	4	3	4	4	1	4	4	4	4	4
50	2	1	2505	60	1	2	2	1	3	2	0	0	0	1	0	0	1	1	73	160	28.5156	1	5	92	3	4	4	4	4	4	3	3	5	3	4	3	3	3	3	3	4	3	3	3	4	4	4	4	3
51	2	1	2511	54	1	2	2	1	4	2	0	0	0	1	0	0	1	1	65	160	25.3906	1	1	91	2	3	3	5	4	3	3	3	3	4	4	3	3	4	4	4	3	5	3	3	2	3	3	5	3
52	2	2	2491	74	1	2	2	2	5	2	0	0	0	1	0	1	1	1	44	155	18.3143	1	1	65	4	4	4	3	3	3	3	3	3	3	3	4	3	3	4	4	3	3	4	3	3	4	4	3	3
53	2	2	2491	74	2	3	2	1	20	2	0	0	0	1	0	0	2	1	50	150	22.2222	1	1	97	1	2	3	3	5	5	5	5	3	4	3	4	4	4	4	4	2	4	4	5	4	3	5	3	3
54	2	2	2493	72	1	2	2	7	10	2	0	0	0	1	0	0	1	1	59	150	26.2222	1	1	93	4	4	3	5	5	4	4	4	4	2	5	2	3	3	3	4	4	3	3	3	3	3	2	2	1
55	2	2	2492	73	1	4	2	3	2	2	0	0	0	1	0	0	1	1	65	150	28.8889	1	1	96	5	2	1	5	4	3	4	4	1	2	2	4	3	2	3	4	4	3	3	1	3	4	1	3	1
56	2	2	2492	73	1	4	2	1	2	2	0	0	0	1	0	0	1	1	55	159	21.7555	1	1	98	4	2	4	5	4	4	5	5	5	4	3	5	5	5	5	5	3	5	5	4	5	5	4	5	3
57	2	2	2493	72	1	2	2	3	8	2	0	0	0	1	0	0	1	2	60	148	27.3923	1	1	96	4	2	4	5	4	4	5	5	5	4	3	5	5	5	5	5	3	5	5	4	5	5	4	5	3
58	2	2	2495	70	1	2	2	1	4	2	0	0	0	1	0	1	1	1	54	145	25.6837	1	1	98	3	2	3	4	3	3	3	3	2	4	3	3	3	3	3	4	3	4	4	4	3	3	4	4	4
59	2	2	2492	73	1	2	2	1	2	2	0	0	0	1	1	1	1	1	65	156	26.7094	1	1	100	3	3	3	4	3	3	3	3	4	4	2	3	3	3	4	3	3	3	4	4	4	3	3	3	4
60	2	2	2491	74	1	2	2	1	2	2	0	0	0	1	0	0	1	1	52	150	23.1111	1	1	85	3	5	4	4	3	4	4	4	3	4	4	4	4	4	4	4	4	4	4	4	4	4	4	4	3
61	2	2	2492	73	1	3	2	3	10	2	0	1	0	1	0	0	1	1	60	155	24.974	1	1	97	5	2	4	5	5	5	5	5	2	5	3	5	5	5	5	5	4	5	5	4	5	4	5	1	3
62	2	2	2509	56	1	2	1	1	6	2	0	0	0	1	0	0	1	1	62	145	29.4887	1	5	97	5	2	3	4	4	4	4	4	5	4	3	4	4	4	4	4	4	4	4	4	4	4	4	4	3
63	2	2	2495	70	1	4	2	2	20	2	0	0	0	1	0	0	1	1	51	155	21.2279	1	1	78	4	3	4	4	4	4	4	4	2	4	2	4	3	3	4	4	3	4	1	4	4	4	4	4	3
64	2	2	2491	74	1	4	2	6	18	2	0	0	0	1	0	0	1	1	42	149	18.9181	1	1	84	4	3	2	4	4	4	4	4	3	3	3	4	4	4	4	4	4	4	3	4	4	4	4	3	1
65	2	2	2495	70	1	4	2	6	20	2	0	0	0	1	0	0	1	1	53	155	22.0604	1	1	99	4	2	2	4	4	4	4	4	3	3	3	4	4	4	4	4	4	4	3	4	4	4	4	3	1
66	2	2	2494	71	2	2	2	6	10	2	0	0	0	1	0	1	1	1	75	156	30.8185	1	2	112	4	2	2	4	4	4	4	4	2	3	2	4	4	4	4	4	4	4	3	4	4	4	4	3	1
243	2	2	2495	70	1	4	3	1	33	2	0	0	0	1	0	0	1	1	73	162	27.8159	1	1	104	4	5	4	4	3	4	4	4	3	4	4	4	4	4	4	4	3	4	4	3	4	3	4	4	2
244	2	2	2505	60	1	2	2	1	14	2	0	0	0	1	0	0	1	1	51	155	21.2279	1	5	86	3	2	2	4	3	3	3	4	3	3	4	3	3	3	4	3	2	3	3	4	4	4	4	4	4
245	2	2	2513	52	1	1	2	2	14	2	0	0	0	1	0	0	1	1	48	155	19.9792	1	1	73	3	3	3	3	3	4	4	5	2	3	4	3	4	3	3	3	3	4	3	3	3	4	5	5	3
246	2	2	2505	60	1	2	2	1	8	2	0	0	0	1	0	0	1	1	71	150	31.5556	1	3	109	4	2	4	4	4	4	4	4	5	4	3	4	4	4	4	4	3	1	1	3	4	4	4	4	4
247	2	2	2507	58	1	4	2	1	1	2	0	0	0	1	0	0	1	1	73	160	28.5156	1	2	100	1	3	5	5	5	4	4	4	3	4	5	4	4	4	4	4	3	4	4	4	4	4	5	5	2
248	2	2	2512	53	1	3	6	7	1	2	0	0	0	1	0	1	1	1	70	158	28.0404	1	2	93	4	5	4	3	4	4	4	4	2	4	2	4	4	3	4	4	2	4	3	4	4	5	4	4	4
249	2	2	2511	54	1	2	2	1	8	2	0	0	0	1	0	0	1	1	62	149	27.9267	1	2	90	4	3	4	5	5	4	4	4	5	5	4	5	4	4	4	4	4	5	5	5	5	5	5	5	4
250	2	2	2511	54	1	2	2	1	10	2	0	0	0	1	0	0	1	1	45	145	21.4031	1	1	70	4	3	4	4	5	4	4	4	4	4	3	4	4	4	4	4	4	5	5	5	5	5	5	5	3
251	2	1	2515	50	1	2	3	1	6	2	0	0	0	1	0	0	1	1	82	163	30.863	5	5	105	3	3	3	4	4	4	4	5	4	5	3	4	4	4	4	4	3	4	4	4	4	4	5	4	4
252	2	1	2517	48	1	2	5	5	1	2	0	0	0	1	0	0	2	1	65	165	23.8751	5	4	82	3	5	3	3	4	3	3	4	3	4	3	4	4	4	3	4	4	3	3	3	4	3	4	4	4
253	2	2	2516	49	1	2	4	1	10	2	0	0	0	1	0	0	1	1	50	165	18.3655	1	1	73	4	5	4	4	4	4	4	4	3	4	3	4	3	3	4	3	3	4	3	3	4	3	5	3	3
255	2	2	2507	58	1	4	4	7	3	2	0	0	0	1	0	0	2	1	70	150	31.1111	1	2	84	3	5	4	4	4	4	4	1	5	4	5	4	3	4	5	4	4	3	4	3	4	4	4	1	4
257	2	2	2504	61	2	2	2	2	12	2	0	0	0	1	0	0	1	1	76	170	26.2976	1	5	103	3	2	3	4	4	3	4	4	5	3	3	3	4	4	3	2	4	4	4	4	4	4	4	4	3
258	2	2	2513	52	2	2	4	3	11	2	0	0	0	1	0	0	1	1	70	165	25.7117	1	1	104	4	5	3	5	4	4	4	4	5	4	3	3	4	4	4	4	3	4	3	4	3	4	4	5	3
259	2	2	2514	51	2	2	3	3	1	2	0	0	0	1	0	0	1	1	87	165	31.9559	1	5	101	4	5	4	4	4	4	4	4	5	3	3	3	3	3	4	3	3	4	3	4	4	4	3	3	3
260	2	1	2516	49	2	2	5	3	5	2	0	0	0	1	0	0	1	1	83	175	27.102	1	5	87	4	3	4	4	4	4	4	4	3	3	3	4	4	4	4	4	3	4	4	4	4	3	3	5	3
261	2	1	2507	58	2	1	2	1	3	2	0	0	0	1	0	0	1	1	66	170	22.8374	1	1	89	3	3	4	4	4	4	4	4	4	4	3	3	4	4	4	3	4	4	5	4	4	4	4	5	3
262	2	1	2504	61	1	1	2	2	6	2	0	0	0	1	0	0	1	1	66	162	25.1486	1	1	89	3	3	4	4	4	4	4	4	5	4	3	3	4	4	4	4	3	4	5	4	4	4	4	4	4
263	2	1	2500	65	2	2	2	3	5	2	0	0	0	1	0	0	1	1	70	170	24.2215	1	1	86	4	4	4	4	4	4	4	4	3	4	2	3	4	4	3	4	4	3	5	4	4	4	4	4	3
264	2	2	2495	70	2	4	2	7	10	2	0	0	0	1	0	0	1	1	59	146	27.6787	1	1	89	4	3	4	4	4	3	4	4	5	4	3	3	4	4	4	4	3	4	4	4	4	4	4	4	3
265	2	2	2507	58	2	3	2	3	4	2	0	0	0	1	0	0	1	1	55	147	25.4524	1	1	60	3	3	3	4	4	4	4	4	2	2	2	3	3	3	3	4	3	4	4	4	4	4	4	4	3
433	2	1	2520	45	1	2	4	1	2	2	0	0	0	1	0	0	1	1	115	185	33.6012	1	5	98	4	3	4	4	4	4	4	4	5	4	3	4	4	4	4	4	4	4	4	4	4	4	4	4	4
434	2	1	2521	44	1	5	6	5	2	2	0	0	0	1	0	0	1	1	74	165	27.1809	1	5	84	2	3	2	3	4	3	4	4	3	4	2	4	4	4	4	3	4	4	3	4	3	3	4	4	3
435	2	1	2506	59	1	2	2	1	10	2	0	0	0	1	0	0	1	1	96	160	37.5	1	1	100	4	2	4	2	4	4	4	4	3	3	2	4	3	3	4	4	3	4	4	4	4	3	4	4	4
436	2	1	2490	75	1	2	2	1	3	2	0	0	0	1	0	0	1	1	66	175	21.551	1	1	82	4	4	4	3	4	4	4	4	4	4	5	4	4	4	4	4	5	4	4	4	4	4	4	4	4
437	2	1	2493	72	1	4	2	1	10	2	0	0	0	1	0	0	1	1	50	160	19.5312	1	1	80	4	5	4	4	4	4	4	4	4	4	4	4	4	2	4	4	3	4	5	4	4	4	4	4	4
438	2	2	2496	69	1	2	2	3	22	2	0	1	0	1	0	0	1	1	45	150	20	1	1	89	3	5	4	4	4	4	3	4	3	3	4	4	4	4	3	3	4	4	3	3	4	4	4	4	3
439	2	1	2509	56	1	2	4	1	8	2	0	0	0	1	0	0	1	1	61	160	23.8281	3	5	92	3	3	4	5	5	5	5	5	3	5	3	5	5	5	5	5	5	5	5	5	4	5	5	5	5
440	2	2	2520	45	1	2	2	1	7	2	0	0	0	1	0	0	1	1	45	143	22.006	1	1	76	3	3	3	4	3	3	3	4	5	4	5	4	3	3	4	5	3	4	4	5	4	4	4	4	4
441	2	2	2492	73	1	4	2	1	5	2	0	0	0	1	0	0	2	1	55	150	24.4444	1	1	81	3	5	3	4	3	3	3	3	5	3	5	3	3	3	3	3	4	3	2	3	3	3	3	3	3
442	2	2	2499	66	1	2	2	1	19	2	1	0	0	1	0	0	1	1	52	156	21.3675	1	1	85	3	5	4	5	4	3	4	5	5	5	4	5	4	4	4	4	5	5	5	3	4	5	4	5	3
443	2	2	2519	46	1	2	2	1	8	2	0	0	0	1	0	0	1	1	75	165	27.5482	1	1	107	3	3	5	3	4	4	4	4	3	4	2	4	4	5	5	5	4	5	4	4	5	5	3	5	4
444	2	2	2517	48	1	2	2	1	3	2	0	0	0	1	0	0	2	1	58	158	23.2335	1	1	87	3	3	3	4	4	4	4	4	3	4	2	3	5	4	5	5	4	5	4	4	4	5	4	5	3
445	2	1	2508	57	1	2	2	1	5	2	0	0	0	1	0	0	1	1	55	160	21.4844	2	1	87	4	3	3	3	3	3	3	2	5	2	3	2	2	1	1	4	3	3	2	2	3	4	4	3	3
446	2	1	2498	67	1	2	4	1	2	2	0	0	0	1	0	0	1	1	64	165	23.5078	1	1	88	4	3	1	5	5	5	5	5	5	1	4	5	5	5	5	5	4	4	5	5	4	4	4	4	4
447	2	1	2503	62	1	2	2	1	6	2	0	0	0	1	0	0	1	1	65	160	25.3906	1	5	91	3	3	4	1	5	4	4	4	3	4	3	4	4	4	4	4	2	4	4	3	4	4	1	4	3
448	2	1	2506	59	1	2	4	1	1	2	0	0	0	1	0	0	2	1	51	155	21.2279	5	2	89	3	5	4	1	4	4	4	4	5	4	3	5	5	5	5	4	4	4	4	4	4	4	4	4	3
449	2	1	2516	49	1	1	5	1	5	2	0	0	0	1	0	0	1	1	75	165	27.5482	1	5	93	3	2	3	2	5	5	4	2	2	1	2	4	4	4	4	4	4	4	4	5	5	5	4	5	3
450	2	1	2510	55	1	1	2	1	9	2	0	0	0	1	0	1	2	1	62	165	22.7732	1	5	82	4	4	4	5	4	4	4	4	5	4	2	3	4	3	3	3	3	4	4	4	4	4	3	3	3
451	2	1	2497	68	1	2	2	1	2	2	0	0	0	1	0	0	1	1	63	160	24.6094	1	1	98	3	5	3	3	3	3	3	3	5	3	2	3	3	3	3	3	3	3	3	4	4	4	4	4	4
452	2	2	2509	56	1	4	2	1	10	2	0	0	0	1	0	0	1	1	57	155	23.7253	1	1	82	2	5	4	2	3	3	3	3	5	4	2	3	4	4	3	3	2	4	3	3	3	3	4	4	3
453	2	1	2505	60	1	1	2	2	8	2	0	0	1	1	0	0	1	1	65	160	25.3906	1	1	88	3	5	3	4	4	3	5	4	2	3	3	3	3	3	3	3	3	4	4	3	4	4	4	4	4
454	2	1	2506	59	1	2	3	1	3	2	0	0	0	1	0	1	1	1	62	165	22.7732	3	3	83	4	3	4	4	4	4	4	4	3	4	2	4	4	4	4	4	4	5	4	4	4	4	4	4	4
455	2	2	2513	52	1	2	2	1	1	2	0	0	0	1	0	0	1	1	63	155	26.2227	1	1	101	4	5	4	3	5	5	5	5	5	4	2	5	5	5	5	4	4	4	4	3	5	5	5	5	3
456	2	2	2519	46	1	4	2	1	10	2	0	0	0	1	0	0	1	1	50	155	20.8117	1	1	75	3	4	3	3	4	3	4	4	5	4	3	4	4	4	3	4	3	4	3	3	4	4	4	4	3
457	2	2	2509	56	1	2	2	7	5	2	0	0	0	1	0	0	1	1	72	155	29.9688	1	5	96	4	5	4	4	4	4	4	4	5	4	2	4	4	3	4	4	3	4	2	3	4	4	4	4	3
458	2	1	2504	61	1	2	2	2	20	2	0	0	0	1	0	0	1	1	60	160	23.4375	1	1	79	3	2	3	4	4	4	4	4	4	3	2	3	3	4	4	4	4	3	3	3	4	4	4	3	3
459	2	1	2498	67	1	2	2	1	10	2	0	0	0	1	0	0	1	1	69	172	23.3234	3	3	89	3	3	4	4	4	4	3	3	5	4	4	4	4	4	4	4	3	4	4	3	3	4	3	4	3
460	2	2	2492	73	1	2	2	1	9	2	0	0	0	1	0	0	1	1	43	145	20.4518	1	1	74	3	5	3	2	3	3	3	3	3	3	3	3	4	4	4	4	2	4	4	4	4	4	4	4	3
461	2	2	2491	74	1	2	2	1	4	2	0	0	0	1	0	0	1	1	57	156	23.4221	1	1	70	3	5	4	4	4	4	3	3	5	4	3	3	4	4	4	4	3	4	4	4	4	4	3	4	3
462	2	2	2498	67	1	2	1	1	6	2	0	0	0	1	0	0	1	1	60	150	26.6667	1	1	77	3	2	4	5	5	4	4	4	3	4	4	4	4	4	4	4	4	4	4	4	4	3	4	4	3
463	2	1	2495	70	1	2	2	1	7	2	0	0	0	1	0	0	1	1	54	160	21.0937	1	1	79	3	3	4	4	4	4	4	4	4	4	5	4	4	4	4	4	4	5	4	4	4	4	4	4	4
464	2	2	2494	71	1	3	2	1	20	2	0	0	1	1	0	0	1	1	53	140	27.0408	1	1	99	3	3	4	4	4	4	4	3	5	4	3	4	4	3	3	4	3	3	3	4	4	4	4	4	3
465	2	2	2507	58	1	2	4	7	10	2	0	0	0	1	0	0	1	1	59	155	24.5578	1	1	83	3	5	3	4	4	4	4	3	4	4	3	4	4	4	3	3	4	3	4	4	4	4	4	4	3
466	2	1	2500	65	1	2	2	1	10	2	0	0	0	1	0	0	1	1	61	170	21.1073	1	1	82	3	5	3	4	4	4	4	3	5	3	4	3	3	3	4	4	4	3	3	4	4	4	4	4	3
467	2	2	2512	53	1	3	2	1	10	2	0	0	0	1	0	0	1	1	66	160	25.7812	1	1	80	3	5	4	4	4	4	3	3	2	3	2	3	3	4	4	4	4	3	4	4	2	4	4	3	3
468	2	2	2514	51	1	2	3	1	8	2	0	0	0	1	0	0	1	1	52	147	24.064	1	1	78	1	4	3	4	4	5	3	3	5	3	4	3	3	3	4	3	3	4	3	3	3	3	3	4	3
469	2	2	2506	59	1	2	2	3	7	2	0	0	0	1	0	0	1	1	59	150	26.2222	1	1	87	2	5	3	4	3	3	3	3	5	3	4	3	3	3	3	3	2	3	4	4	3	3	4	4	3
470	2	2	2503	62	1	2	2	1	3	2	0	0	0	1	0	0	1	1	70	155	29.1363	1	1	103	3	3	3	4	4	4	3	3	3	3	2	3	3	3	4	4	3	4	4	4	4	3	3	5	3
471	2	1	2494	71	1	2	2	1	5	2	0	0	0	1	0	0	1	1	62	158	24.8358	1	1	89	4	4	4	4	4	4	4	4	2	3	2	3	4	4	4	4	3	5	4	4	4	4	4	4	3
472	2	2	2518	47	1	2	2	1	5	2	0	0	0	1	0	0	1	1	47	158	18.8271	1	1	69	3	5	3	4	3	3	3	4	3	4	3	3	3	4	4	4	4	5	3	4	4	3	4	3	3
473	2	2	2502	63	1	2	2	1	15	2	0	1	0	1	0	0	1	1	64	150	28.4444	1	1	97	3	4	3	2	3	3	3	4	2	3	3	3	4	4	4	4	3	4	4	4	4	4	4	4	3
474	2	1	2495	70	1	4	2	1	1	2	0	0	0	1	0	0	1	1	55	163	20.7008	1	1	80	3	2	3	4	3	3	3	3	3	3	3	3	3	3	3	3	3	3	3	3	2	2	3	2	3
475	2	1	2491	74	1	2	2	1	3	2	0	0	0	1	0	0	1	1	73	163	27.4756	1	1	92	3	3	3	4	3	3	3	3	4	3	3	3	3	3	4	4	3	4	3	3	3	3	3	5	3
476	2	2	2497	68	1	2	2	1	50	2	0	0	0	1	0	0	1	1	50	155	20.8117	1	1	83	3	2	3	4	3	3	3	3	2	3	2	4	4	3	3	3	3	4	3	4	4	4	4	3	3
477	2	2	2505	60	1	4	2	1	10	2	0	0	0	1	0	0	1	1	58	155	24.1415	1	1	89	4	3	3	4	3	3	3	3	2	3	2	3	3	3	3	3	3	4	3	3	3	3	3	4	3
478	2	2	2510	55	1	2	2	1	2	2	0	0	0	1	0	0	1	1	61	165	22.4059	1	1	93	3	3	4	4	4	4	4	3	3	4	3	4	4	4	4	3	3	4	4	4	4	4	4	4	3
480	2	1	2503	62	1	2	2	1	10	2	0	0	0	1	0	1	1	1	75	175	24.4898	5	1	86	5	3	4	3	5	5	5	4	3	5	3	4	4	5	5	5	3	5	4	5	5	5	5	5	5
481	2	2	2494	71	1	2	2	1	4	2	0	0	0	1	0	0	1	1	56	151	24.5603	1	1	94	3	4	3	5	3	3	3	3	4	4	3	4	4	4	4	4	3	5	4	4	4	3	3	3	4
597	2	2	2500	65	1	2	2	1	20	2	0	0	0	1	0	0	1	1	63	168	22.3214	1	1	100	3	4	2	2	3	3	3	3	4	3	4	3	3	3	3	3	3	4	3	3	3	3	3	3	3
598	2	2	2504	61	1	2	2	1	10	2	0	0	0	1	0	0	1	1	60	165	22.0386	1	1	94	3	5	3	3	4	3	3	3	5	4	5	4	4	4	4	3	4	4	2	3	3	4	4	4	4
599	2	2	2514	51	1	2	2	1	1	2	0	0	0	1	0	0	1	2	65	140	33.1633	1	1	96	3	5	3	2	3	3	3	3	5	3	4	3	3	3	3	3	4	4	3	3	3	4	3	4	4
600	2	2	2502	63	1	2	2	1	5	2	0	0	0	1	0	0	1	1	40	148	18.2615	1	1	84	3	5	3	4	3	3	4	5	5	2	4	3	4	4	3	3	3	3	4	3	3	2	4	3	3
601	2	2	2519	46	1	2	2	1	1	2	0	0	0	1	0	0	1	1	73	160	28.5156	1	1	94	5	2	3	4	4	4	4	4	3	5	5	4	4	4	4	4	4	5	4	3	3	3	5	3	3
602	2	2	2502	63	1	1	2	1	20	2	0	0	0	1	0	0	1	1	61	165	22.4059	1	1	83	4	3	3	4	3	3	4	5	4	3	2	3	3	4	4	4	4	4	4	3	3	4	4	4	2
603	2	2	2513	52	1	1	2	1	12	2	0	0	0	1	0	0	1	1	74	158	29.6427	1	1	98	3	3	3	3	5	4	5	5	2	3	2	3	4	4	4	4	4	5	5	4	4	4	4	4	3
604	2	2	2514	51	1	2	2	1	10	2	0	0	0	1	0	0	1	1	54	160	21.0937	1	1	75	4	3	4	2	4	4	4	4	5	4	5	4	4	4	4	4	2	4	4	4	5	4	4	5	2
605	2	2	2505	60	1	2	2	1	3	2	0	0	0	1	0	0	1	1	54	155	22.4766	1	1	85	4	4	3	5	5	4	4	4	5	4	5	4	5	3	4	4	4	5	5	3	4	4	4	4	3
606	2	2	2505	60	1	2	2	3	2	2	0	0	0	1	0	0	1	1	71	170	24.5675	1	5	90	3	3	4	5	5	5	5	5	5	5	5	4	5	4	5	5	3	4	5	5	5	5	5	5	3
607	2	2	2501	64	1	2	2	1	5	2	0	0	0	1	0	0	1	1	72	150	32	1	1	97	4	4	4	4	3	4	4	4	3	4	4	4	4	4	4	3	4	4	4	4	4	4	4	4	3
608	2	2	2507	58	1	2	2	1	10	2	1	0	0	1	0	0	1	1	54	150	24	1	1	84	3	4	4	4	4	4	4	4	4	4	5	4	4	4	4	4	4	4	4	4	4	4	4	4	3
609	2	2	2511	54	1	1	2	1	10	2	0	0	0	1	0	0	1	2	65	150	28.8889	1	1	86	4	5	4	4	4	4	4	4	4	4	5	4	4	4	4	4	4	4	4	4	4	4	4	4	3
610	2	2	2493	72	1	2	2	1	4	2	0	0	0	1	0	0	1	1	53	150	23.5556	1	1	97	4	4	2	2	4	3	3	3	4	3	4	3	3	4	4	3	3	4	4	3	3	3	3	3	3
611	2	2	2503	62	1	2	2	1	7	2	0	0	0	1	0	0	1	1	46	153	19.6506	1	1	83	4	5	3	4	4	4	4	4	5	4	5	3	3	3	4	3	3	3	4	3	4	3	3	3	3
612	2	2	2500	65	1	4	2	1	10	2	0	0	0	1	0	0	1	1	44	155	18.3143	1	1	85	4	5	3	4	4	4	4	4	5	4	5	3	3	4	4	4	3	4	4	3	3	3	3	3	3
613	2	2	2513	52	1	2	3	3	10	2	0	0	0	1	0	0	1	1	95	170	32.872	2	5	119	4	4	5	5	5	5	5	5	3	4	3	4	4	4	4	4	3	5	5	5	5	5	5	5	2
614	2	2	2515	50	1	2	2	1	5	2	0	0	0	1	0	0	1	1	75	175	24.4898	1	1	87	4	5	4	4	4	4	4	4	5	4	4	4	4	4	4	4	4	4	4	4	4	4	4	4	3
615	2	2	2512	53	1	2	2	1	3	2	0	0	0	1	0	0	1	1	69	170	23.8754	1	5	82	4	4	3	4	4	4	4	4	5	3	5	3	3	4	4	3	3	3	4	3	3	3	3	3	3
616	2	2	2511	54	1	2	2	1	2	2	0	0	0	1	0	0	1	1	62	159	24.5243	1	5	87	3	3	3	4	4	3	4	3	3	3	2	4	4	5	4	3	3	5	4	4	3	4	5	4	4
617	2	2	2510	55	1	4	2	1	3	2	0	0	0	1	0	0	2	1	43	158	17.2248	5	1	76	2	5	2	3	3	3	4	4	5	3	5	3	3	3	3	4	3	4	3	2	3	4	3	3	4
618	2	1	2514	51	1	1	2	1	3	2	0	0	0	1	0	1	2	1	74	169	25.9095	1	1	87	3	2	4	4	4	4	3	5	5	3	2	3	4	4	4	4	5	5	4	4	4	4	5	4	2
619	2	1	2514	51	1	2	2	1	13	2	0	0	0	1	0	0	1	1	50	160	19.5312	3	3	72	3	2	4	5	3	4	4	4	3	3	4	3	4	3	3	3	3	3	5	4	3	3	3	3	3
620	2	2	2497	68	1	2	2	1	4	2	0	0	0	1	0	0	1	1	62	150	27.5556	1	1	89	3	3	3	4	3	3	4	4	4	3	3	3	4	4	3	4	3	4	2	2	4	3	3	3	4
621	2	1	2495	70	1	2	2	2	10	2	0	0	0	1	0	0	1	1	55	160	21.4844	1	1	75	4	4	4	4	4	4	4	4	4	4	5	4	4	4	4	4	3	4	4	4	4	4	4	4	4
622	2	2	2495	70	1	4	2	1	6	2	0	0	0	1	0	0	1	1	43	150	19.1111	1	1	78	3	3	3	4	4	3	3	3	5	3	5	3	4	4	3	3	3	3	3	4	3	4	4	4	3
623	2	2	2496	69	1	2	2	3	5	2	0	0	0	1	0	0	1	1	57	155	23.7253	1	1	92	3	2	3	4	4	4	4	3	3	4	4	4	3	3	4	3	3	4	3	4	3	3	3	3	4
624	2	1	2494	71	1	2	2	1	4	2	0	0	0	1	0	0	1	1	60	154	25.2994	3	3	72	4	3	3	4	4	4	4	4	4	4	3	4	3	3	4	4	4	4	4	4	4	3	4	3	3
625	2	2	2496	69	1	4	2	1	15	2	0	0	0	1	0	0	1	1	40	140	20.4082	1	5	78	4	2	3	4	4	4	4	4	3	4	2	4	4	4	4	4	4	4	4	4	4	4	4	4	3
626	2	2	2495	70	1	1	2	1	7	2	0	0	0	1	0	0	1	1	55	150	24.4444	1	1	85	4	4	4	5	4	4	5	5	3	4	2	4	4	5	4	4	2	4	5	4	5	5	5	5	2
627	2	2	2500	65	2	2	2	1	23	2	0	0	0	1	0	0	1	1	55	160	21.4844	1	5	78	2	5	4	2	4	2	5	5	4	3	4	3	4	4	4	4	3	4	5	4	4	4	4	5	3
628	2	2	2499	66	1	4	2	3	20	2	0	0	0	1	0	0	1	1	88	160	34.375	1	3	105	4	5	4	5	4	4	4	4	1	4	5	4	4	4	4	4	3	5	4	4	4	4	4	4	5
629	2	2	2495	70	1	2	2	3	7	2	0	0	0	1	0	0	1	1	65	150	28.8889	1	1	98	3	5	4	4	4	4	4	4	1	4	5	4	1	1	4	4	4	4	5	4	4	4	4	4	4
630	2	2	2509	56	1	4	2	1	12	2	0	0	0	1	0	0	1	1	72	150	32	1	3	100	3	5	3	4	3	4	3	3	5	4	3	4	2	2	3	4	3	4	4	4	3	3	4	3	3
631	2	1	2499	66	1	2	2	1	36	2	0	0	0	1	0	0	1	1	78	170	26.9896	3	3	102	4	3	4	4	4	4	4	4	4	4	2	4	4	4	4	4	4	4	4	4	4	4	3	4	2
632	2	2	2498	67	1	2	2	1	16	2	0	0	0	1	0	0	1	1	66	155	27.4714	1	5	98	2	5	2	4	3	4	4	4	5	4	4	4	4	4	5	5	3	5	5	4	5	4	5	5	3
633	2	1	2496	69	1	5	2	2	10	2	0	0	0	1	0	0	1	1	60	160	23.4375	2	5	90	3	4	4	4	5	4	4	4	3	4	5	5	4	4	5	5	4	4	4	4	5	4	4	4	3
634	2	2	2494	71	1	4	6	4	6	2	0	0	0	1	0	0	1	1	61	160	23.8281	1	1	90	4	3	4	5	5	5	5	5	2	4	5	5	5	4	5	5	4	5	5	5	5	5	5	5	2
635	2	2	2509	56	1	2	4	1	5	2	0	0	0	1	0	0	1	1	63	160	24.6094	1	1	94	3	3	4	3	5	3	5	5	3	4	5	3	3	3	3	3	3	4	3	3	3	5	5	5	3
636	2	2	2510	55	1	2	2	1	4	2	0	0	0	1	0	1	2	1	58	150	25.7778	1	5	92	3	3	3	4	4	3	4	4	3	4	3	3	3	3	3	4	3	4	4	3	4	5	4	5	4
637	2	2	2505	60	1	4	2	1	7	2	0	0	0	1	0	0	1	1	72	150	32	1	1	101	4	3	3	4	4	3	3	3	3	3	3	3	4	4	3	3	3	4	3	3	3	3	3	3	3
638	2	2	2505	60	1	2	2	1	10	2	0	0	0	1	0	0	1	1	68	155	28.3039	1	1	104	3	2	4	3	4	3	3	3	5	4	4	4	4	4	3	3	3	3	2	3	4	4	4	4	4
639	2	2	2512	53	1	4	2	7	5	2	0	0	0	1	0	0	1	1	67	155	27.8876	1	1	100	3	3	2	5	3	3	4	4	4	3	3	4	3	3	3	3	3	4	4	5	5	5	3	5	3
640	2	2	2512	53	1	1	2	1	7	2	0	0	0	1	0	0	1	1	58	145	27.5862	1	1	98	4	2	5	3	5	4	5	5	3	4	3	4	4	4	4	5	3	4	5	4	5	5	5	5	3
641	2	2	2508	57	1	2	2	1	10	2	0	0	0	1	0	0	1	1	53	161	20.4467	1	1	82	3	5	4	3	4	4	3	5	5	4	2	4	4	4	4	5	4	3	4	4	4	4	4	4	5
642	2	2	2491	74	1	4	2	1	8	2	0	0	0	1	0	0	1	1	55	152	23.8054	1	1	96	4	3	3	3	3	3	4	4	4	3	4	3	3	3	4	3	2	5	3	4	4	3	3	3	4
643	2	1	2504	61	1	2	2	1	6	2	0	0	0	1	0	0	1	1	52	173	17.3745	2	5	76	3	5	3	5	5	5	5	1	3	1	2	5	4	5	5	2	5	4	4	5	5	4	5	4	5
644	2	2	2495	70	1	2	2	1	24	2	0	0	0	1	0	0	1	1	43	149	19.3685	1	1	76	4	5	3	5	5	3	5	4	5	3	5	5	5	5	3	5	3	5	4	5	5	5	5	4	3
645	2	2	2495	70	1	4	2	6	10	2	0	0	0	1	0	1	1	1	70	150	31.1111	1	1	106	4	2	2	2	5	3	4	5	2	5	2	5	5	5	3	5	3	5	5	5	5	5	4	4	3
646	2	2	2508	57	1	2	2	1	10	2	0	0	0	1	0	0	2	1	56	165	20.5693	1	1	77	2	2	3	4	3	3	4	4	2	3	2	3	3	3	3	4	4	4	3	3	4	3	3	3	5
647	2	2	2490	75	1	1	4	1	5	2	0	0	0	1	0	0	1	1	60	160	23.4375	1	1	90	5	4	3	2	5	4	3	3	2	3	5	3	4	4	3	4	4	5	5	3	4	3	3	3	4
648	2	2	2505	60	1	2	2	1	23	2	0	0	0	1	0	0	1	2	78	155	32.4662	1	1	105	3	5	3	4	3	3	4	4	5	3	5	3	3	3	4	4	3	4	3	3	4	3	3	3	3
649	2	2	2504	61	1	2	2	1	5	2	0	0	0	1	0	0	1	1	75	157	30.4272	1	1	99	3	4	3	3	3	3	4	4	4	3	1	3	3	3	3	4	3	4	3	3	4	3	3	3	4
650	2	2	2516	49	1	2	2	1	10	2	0	0	0	1	0	0	1	1	59	158	23.634	1	1	94	3	3	4	4	4	4	3	3	5	3	5	3	3	3	3	4	3	4	3	2	4	3	3	3	3
67	2	1	2496	69	1	2	2	1	12	2	0	0	0	1	0	0	1	1	70	165	25.7117	3	3	100	5	2	4	4	5	4	4	4	2	4	2	4	4	5	4	5	3	4	3	4	3	4	4	5	2
68	2	1	2493	72	1	2	2	1	10	2	0	0	0	1	0	0	1	1	55	165	20.202	1	1	91	3	2	4	3	4	4	5	4	2	5	2	4	5	5	3	5	5	5	3	5	5	5	5	5	3
69	2	1	2515	50	1	2	2	1	1	2	0	0	0	1	0	0	1	1	45	168	15.9439	3	5	90	4	2	4	4	4	4	4	4	2	3	2	4	4	4	4	5	4	4	4	4	4	4	5	5	3
70	2	1	2518	47	1	2	6	4	1	2	0	0	0	1	0	0	1	1	70	155	29.1363	1	5	94	4	3	4	4	4	4	4	4	4	5	2	4	4	4	4	5	3	4	4	2	5	2	5	5	4
71	2	1	2522	43	1	1	3	1	5	2	0	0	0	1	0	0	1	1	53	165	19.4674	1	5	79	3	2	4	4	3	4	3	3	2	4	2	4	4	4	4	3	4	4	3	3	4	4	4	4	3
72	2	2	2499	66	1	3	2	1	30	2	0	0	0	1	0	0	1	1	51	150	22.6667	5	5	84	1	5	5	5	5	5	5	1	2	5	2	5	5	5	5	5	2	5	5	5	5	5	5	5	1
73	2	2	2496	69	1	2	2	1	5	2	0	1	0	1	0	0	1	1	56	155	23.3091	1	1	102	3	2	2	3	3	3	3	3	2	3	2	3	4	3	4	4	3	2	3	3	3	4	4	4	3
74	2	2	2499	66	1	2	2	1	19	2	0	1	0	1	0	0	1	1	62	160	24.2187	1	1	97	3	2	3	4	3	3	3	3	2	3	2	3	4	4	4	4	3	4	3	4	4	3	4	3	4
75	2	1	2499	66	1	1	2	1	7	2	0	0	0	1	0	0	1	1	82	159	32.4354	1	1	111	2	2	4	5	4	5	4	3	3	2	2	3	3	2	3	4	3	2	2	3	2	2	2	2	1
76	2	1	2497	68	1	3	2	1	20	2	0	0	0	1	0	0	1	1	64	170	22.1453	1	1	82	3	2	3	5	5	5	5	5	1	5	2	5	3	4	3	5	3	5	2	3	5	5	4	5	5
77	2	1	2498	67	1	2	2	1	9	2	0	0	1	1	0	0	1	1	60	157	24.3418	1	1	102	1	2	3	4	2	4	2	3	3	3	3	3	4	4	4	4	3	5	5	4	4	4	4	4	4
78	2	1	2500	65	1	2	4	1	5	2	0	0	0	1	0	0	1	1	73	165	26.8136	3	2	72	1	4	1	2	2	2	2	3	3	3	3	2	2	2	4	4	4	4	4	4	4	1	2	2	2
79	2	1	2498	67	1	2	2	1	1	2	0	0	0	1	0	0	1	1	42	170	14.5329	5	2	72	3	3	3	3	3	3	3	3	2	3	2	3	3	3	4	4	4	4	4	4	4	4	3	4	3
80	2	1	2499	66	1	2	2	1	15	2	0	0	0	1	0	0	1	1	60	165	22.0386	5	5	83	4	1	4	5	5	4	4	4	3	4	2	4	4	4	3	3	3	3	4	4	4	4	4	4	4
81	2	1	2498	67	1	2	2	1	5	2	0	0	0	1	0	0	1	1	65	165	23.8751	5	5	81	4	3	4	4	4	4	4	4	5	4	4	4	4	4	4	4	3	4	4	4	4	4	4	4	4
82	2	2	2509	56	1	2	2	3	15	2	0	0	0	1	0	0	1	1	83	150	36.8889	2	5	115	4	2	4	4	4	4	4	4	2	4	2	4	4	4	4	4	4	4	4	4	4	4	4	4	4
83	2	2	2513	52	1	4	2	1	10	2	0	0	0	1	0	0	1	1	65	154	27.4077	1	1	98	3	3	3	3	5	3	5	5	4	3	3	3	5	5	3	4	3	4	5	4	4	4	5	5	5
84	2	2	2511	54	1	3	4	1	2	2	0	0	0	1	0	0	1	1	56	152	24.2382	1	1	78	3	2	4	4	3	4	3	4	1	4	1	4	4	4	4	4	2	4	4	4	3	4	4	4	3
85	2	2	2514	51	1	2	2	2	3	2	0	0	0	1	0	0	2	2	70	155	29.1363	1	1	89	3	4	5	2	4	5	5	5	4	5	4	5	5	5	5	5	3	5	5	4	5	5	5	5	5
86	2	2	2510	55	1	5	2	1	5	2	0	0	0	1	0	0	1	1	47	150	20.8889	1	1	87	4	1	5	4	4	4	4	4	2	4	2	4	4	3	4	4	2	2	4	4	4	5	5	5	3
87	2	2	2513	52	1	2	2	1	20	2	0	0	0	1	0	0	1	1	64	154	26.986	1	1	95	3	2	3	5	5	5	5	5	4	5	2	4	5	5	5	5	4	5	3	5	5	5	5	5	5
88	2	2	2505	60	1	2	2	1	10	2	0	0	0	1	0	0	1	1	57	154	24.0344	1	1	91	3	3	3	3	3	4	3	4	2	4	2	4	4	4	4	4	5	5	3	3	4	3	4	5	4
89	2	2	2507	58	1	2	2	1	5	2	0	0	0	1	0	0	1	1	49	150	21.7778	1	5	78	5	4	5	5	5	5	5	5	3	1	4	5	5	5	5	5	5	5	5	5	5	5	5	5	5
90	2	2	2510	55	1	2	2	1	30	2	0	0	0	1	0	0	1	1	65	155	27.0552	1	1	98	5	3	5	5	5	4	5	5	3	5	2	5	5	5	5	5	3	5	4	5	5	5	5	5	1
91	2	2	2504	61	1	1	2	1	5	2	0	0	0	1	0	0	1	1	50	153	21.3593	1	1	86	4	2	1	5	5	5	4	4	2	3	3	3	3	3	3	3	3	3	3	3	3	3	2	4	4
92	2	2	2502	63	1	4	2	1	15	2	0	0	0	1	0	0	2	1	60	160	23.4375	1	1	102	3	2	4	4	3	3	3	4	3	4	2	4	3	3	3	3	3	3	4	3	3	3	4	4	4
93	2	2	2502	63	1	2	2	1	10	2	0	0	0	1	0	0	1	1	46	153	19.6506	1	1	84	1	3	4	2	5	5	5	5	1	4	2	4	5	5	5	5	5	5	5	4	5	2	5	2	3
94	2	2	2503	62	1	4	2	1	13	2	0	0	0	1	0	0	1	1	60	155	24.974	1	1	103	3	3	4	3	3	3	3	5	2	4	2	4	4	5	4	4	3	5	3	5	3	5	5	5	4
95	2	2	2499	66	1	4	2	1	10	2	0	0	0	1	0	0	1	1	68	160	26.5625	1	1	102	4	2	5	5	5	5	5	5	4	5	3	5	5	5	5	5	4	5	4	4	5	5	5	5	3
96	2	2	2503	62	1	5	2	1	3	2	1	0	0	1	0	0	1	1	62	158	24.8358	1	1	97	4	4	4	3	4	4	5	5	3	5	2	4	4	5	3	3	3	4	5	4	4	3	4	5	1
97	2	2	2504	61	1	2	2	1	6	2	0	0	0	1	0	0	1	1	60	161	23.1473	1	1	92	3	4	4	4	4	4	5	4	3	4	2	4	3	3	4	4	4	4	3	4	4	4	4	4	3
98	2	2	2500	65	1	2	2	1	15	2	0	0	0	1	0	0	2	1	69	150	30.6667	1	1	117	3	4	4	3	3	3	3	3	4	4	3	3	3	3	4	4	4	4	3	3	3	3	4	4	4
99	2	2	2503	62	1	2	2	1	13	2	0	0	0	1	0	0	1	1	63	152	27.268	1	1	89	4	2	4	4	4	4	4	4	3	4	2	4	4	4	4	4	3	4	4	4	3	4	4	4	3
100	2	2	2507	58	1	2	2	1	14	2	0	0	0	1	0	1	1	1	65	162	24.7676	3	3	93	4	2	4	5	3	5	3	3	2	5	2	5	5	5	5	5	3	5	5	5	5	4	5	5	3
101	2	2	2500	65	1	4	2	1	3	2	0	0	0	1	0	0	1	1	62	155	25.8065	1	1	91	3	2	5	5	3	5	3	5	3	5	3	5	5	4	4	4	2	5	4	4	5	5	3	5	2
102	2	2	2494	71	1	4	2	1	2	2	0	0	0	1	0	0	1	1	59	150	26.2222	1	1	94	5	2	4	3	4	4	4	4	2	4	3	4	5	3	4	5	2	4	4	3	5	2	5	5	5
103	2	2	2499	66	1	4	2	1	10	2	0	0	0	1	0	0	1	1	67	157	27.1816	1	1	112	3	1	3	3	4	2	4	5	2	4	2	3	4	4	4	4	2	4	4	4	4	3	4	4	2
104	2	2	2503	62	1	4	2	1	16	2	0	0	0	1	0	0	1	1	58	155	24.1415	1	1	90	3	3	3	5	3	3	3	2	3	4	2	3	2	3	3	4	3	4	3	3	5	4	4	4	3
105	2	2	2495	70	1	4	2	1	13	2	0	0	0	1	0	0	1	1	63	164	23.4236	1	1	94	1	2	5	1	1	4	4	5	2	5	3	5	5	4	3	4	3	4	1	3	4	4	4	4	3
106	2	1	2502	63	1	2	2	1	2	2	0	0	0	1	0	0	1	1	60	157	24.3418	2	5	86	3	3	2	3	3	3	3	3	4	3	4	3	3	3	3	3	3	3	3	3	3	3	3	3	3
107	2	1	2503	62	1	2	2	1	3	2	0	0	0	1	0	0	2	1	63	160	24.6094	2	5	91	2	3	3	3	3	3	3	3	2	3	3	3	3	3	3	3	3	2	3	3	3	3	3	4	3
108	2	1	2503	62	1	2	2	1	2	2	0	0	0	1	0	0	1	1	70	170	24.2215	5	3	92	2	2	3	4	3	3	4	4	4	3	4	4	4	4	4	4	4	4	2	3	3	4	4	4	3
109	2	1	2507	58	1	2	3	1	2	2	0	0	0	1	0	0	1	1	53	160	20.7031	3	1	76	3	3	3	2	3	3	3	3	3	3	3	3	3	3	3	3	4	3	3	3	3	4	4	4	3
110	2	1	2500	65	1	4	2	1	10	2	0	0	0	1	0	0	1	1	60	173	20.0474	1	5	72	5	3	5	5	5	5	4	4	3	5	3	5	4	4	4	4	4	4	4	5	5	5	4	5	5
111	2	1	2511	54	1	2	2	1	2	2	0	0	0	1	0	0	1	1	59	164	21.9363	3	3	80	3	3	2	4	4	3	4	4	3	3	3	3	4	4	4	3	4	4	4	4	4	3	4	3	3
112	2	1	2506	59	1	2	3	1	4	2	0	0	0	1	0	0	1	1	60	155	24.974	3	3	87	4	4	3	4	4	4	4	4	3	4	4	4	4	4	4	4	3	4	4	4	4	4	4	4	4
113	2	2	2492	73	2	2	2	1	15	2	0	0	0	1	0	0	1	1	52	150	23.1111	1	5	81	4	2	4	4	4	4	4	4	3	4	3	4	3	2	4	4	3	4	2	4	4	4	4	4	4
114	2	2	2495	70	1	4	2	7	29	2	0	0	0	1	0	0	1	1	54	155	22.4766	1	1	91	3	3	3	4	4	4	4	4	4	4	3	4	3	3	3	3	3	4	4	3	3	4	4	4	3
115	2	2	2495	70	1	4	2	1	5	2	0	0	0	1	0	0	1	1	35	145	16.6468	1	1	80	5	2	4	5	5	5	4	4	3	4	2	4	4	1	4	1	4	4	4	4	3	4	4	4	3
116	2	2	2491	74	2	2	2	1	25	2	0	0	0	1	0	0	1	1	60	145	28.5375	1	1	96	3	4	4	3	3	3	3	3	3	3	2	4	3	3	3	3	3	4	4	4	3	3	4	4	4
117	2	2	2490	75	1	2	1	1	18	2	0	0	0	1	0	0	1	1	50	150	22.2222	1	1	82	3	2	4	3	3	3	3	3	3	4	3	3	3	3	4	4	4	3	3	4	4	4	4	4	4
118	2	2	2495	70	1	2	2	1	10	2	0	0	0	1	0	1	1	1	50	150	22.2222	1	2	93	3	3	4	3	4	4	4	4	3	4	3	3	3	4	4	4	3	4	5	5	4	4	4	4	2
119	2	2	2493	72	2	4	2	1	12	2	0	0	0	1	0	0	1	1	78	152	33.7604	1	5	105	3	2	3	4	3	4	5	4	2	3	2	4	4	4	4	4	3	4	4	4	4	4	4	4	3
120	2	2	2490	75	1	4	2	1	1	2	0	0	0	1	0	0	1	1	52	156	21.3675	1	1	93	3	4	2	4	4	3	4	4	3	4	4	3	3	3	4	4	4	4	4	4	4	3	4	4	3
122	2	2	2493	72	1	4	2	4	18	2	1	0	0	1	0	0	1	1	47	149	21.1702	1	1	96	4	2	3	4	4	4	3	4	2	4	2	3	3	3	3	4	3	3	3	4	3	5	3	3	1
123	2	2	2493	72	1	2	2	1	11	2	0	0	0	1	0	0	1	1	50	150	22.2222	1	1	94	3	2	3	3	4	4	4	4	2	3	3	4	4	3	4	5	4	4	4	4	4	4	3	3	2
124	2	2	2494	71	1	4	2	1	1	2	0	0	0	1	0	0	1	1	59	154	24.8777	1	1	91	4	3	2	5	5	4	4	5	3	4	3	4	3	3	3	3	4	3	4	2	3	3	4	3	1
125	2	2	2495	70	1	1	2	6	4	2	0	0	0	1	0	0	1	1	53	150	23.5556	1	1	80	3	2	4	5	4	4	4	4	2	3	2	3	2	2	3	3	2	4	3	3	3	2	2	4	1
126	2	2	2491	74	1	4	2	1	10	2	0	0	0	1	0	0	1	2	65	157	26.3702	1	1	101	4	3	2	5	4	4	4	4	3	4	3	2	3	3	2	4	4	3	4	1	4	3	1	3	1
127	2	2	2494	71	1	4	2	7	3	2	0	0	0	1	0	0	1	1	62	160	24.2187	1	1	101	3	3	2	3	4	4	4	4	4	3	3	1	3	4	4	1	1	1	4	3	3	3	2	4	1
215	2	2	2511	54	1	2	4	1	2	2	0	0	0	1	0	0	1	1	50	150	22.2222	1	1	70	3	4	4	4	4	4	4	4	5	4	3	4	4	4	4	4	3	4	4	3	4	4	4	4	4
216	2	2	2507	58	1	2	2	1	5	2	0	0	0	1	0	0	2	1	59	149	26.5754	1	1	89	4	4	4	4	4	4	4	4	4	4	3	4	4	4	4	5	4	4	4	3	4	3	3	4	4
217	2	2	2506	59	1	2	2	1	25	2	1	1	0	1	0	0	2	2	64	155	26.6389	1	3	97	3	4	4	3	5	3	4	3	5	4	4	3	3	4	4	3	3	3	3	4	3	4	4	4	1
218	2	2	2509	56	1	1	2	1	5	2	0	0	0	1	0	0	1	1	64	150	28.4444	1	1	91	3	3	3	3	4	2	3	4	4	2	2	4	4	3	3	4	3	4	3	2	3	3	4	4	2
219	2	2	2509	56	1	2	3	1	10	2	0	0	0	1	0	0	1	1	67	150	29.7778	1	1	91	3	3	4	3	4	4	4	4	4	4	2	3	4	4	4	4	3	4	5	4	3	3	4	3	4
220	2	2	2512	53	1	2	4	1	2	2	0	0	0	1	0	0	1	1	75	160	29.2969	1	1	93	3	3	4	2	4	4	4	4	4	4	2	3	4	4	4	5	3	4	4	3	4	4	4	4	3
221	2	2	2515	50	1	2	2	1	2	2	0	0	0	1	0	0	1	1	62	148	28.3053	1	1	100	3	4	4	4	3	3	4	4	4	4	2	4	4	4	5	5	4	4	4	3	4	4	4	4	4
222	2	2	2505	60	1	2	2	1	13	2	0	0	0	1	0	0	1	1	62	148	28.3053	1	5	85	3	3	4	3	3	4	4	4	3	3	3	4	4	4	5	4	4	4	4	4	4	4	4	4	3
223	2	2	2528	37	1	2	6	4	2	2	0	0	0	1	0	0	1	1	62	148	28.3053	1	5	113	3	4	4	4	3	4	4	4	4	4	3	4	4	4	3	4	3	4	4	3	3	3	4	4	4
224	2	2	2504	61	1	2	2	1	5	2	0	0	0	1	0	0	1	1	85	165	31.2213	1	3	107	4	2	4	5	5	5	5	5	5	5	2	5	5	5	5	5	4	5	5	5	5	5	5	5	5
225	2	2	2506	59	1	2	2	1	6	2	0	0	0	1	0	1	2	1	73	149	32.8814	1	1	102	3	4	4	4	4	4	4	4	5	4	4	4	4	4	3	3	2	4	4	4	4	4	4	4	4
226	2	2	2519	46	2	2	6	3	1	2	0	0	0	1	0	0	1	1	43	150	19.1111	1	1	96	1	4	3	5	4	4	4	4	4	4	5	4	4	4	4	4	4	5	4	4	4	4	4	4	4
227	2	2	2500	65	2	4	3	3	13	2	0	0	0	1	0	0	1	1	44	150	19.5556	1	1	87	4	4	4	4	4	4	4	4	5	3	4	3	3	2	4	4	4	4	4	4	4	4	5	5	3
228	2	2	2518	47	2	2	2	2	15	2	0	0	0	1	0	0	1	1	64	156	26.2985	1	1	88	3	4	4	4	4	4	4	4	5	3	4	3	3	3	3	3	4	4	4	4	4	4	4	4	3
229	2	2	2509	56	2	2	4	2	5	2	0	0	0	1	0	0	2	1	84	170	29.0657	5	5	84	2	4	3	3	3	3	3	3	5	3	2	3	3	2	3	3	3	4	4	4	3	4	4	4	3
230	2	1	2512	53	2	2	2	1	5	2	0	0	0	1	0	0	1	1	62	171	21.2031	1	1	76	4	3	4	4	4	4	4	4	3	4	3	4	4	4	4	4	4	4	4	4	4	3	3	4	3
231	2	2	2507	58	2	2	2	7	10	2	0	0	0	1	0	0	1	1	59	145	28.0618	1	1	70	3	4	4	4	4	4	4	4	5	4	3	4	4	4	3	3	3	4	4	4	4	4	4	4	3
232	2	1	2498	67	2	2	3	1	4	2	0	0	0	1	0	0	1	1	61	162	23.2434	1	5	82	5	3	4	5	5	5	5	5	2	5	2	5	4	1	5	5	5	5	5	4	5	5	5	5	2
233	2	2	2506	59	2	2	3	6	20	2	0	0	0	1	0	0	2	1	52	157	21.0962	3	3	73	4	4	5	5	5	5	5	5	5	4	2	5	5	4	5	5	4	4	5	4	5	5	5	5	3
234	2	2	2507	58	2	1	2	3	7	2	0	0	0	1	0	0	1	1	76	156	31.2295	1	2	84	4	3	4	2	4	4	5	5	3	5	3	5	5	5	3	5	3	4	5	4	5	4	5	5	2
235	2	1	2492	73	2	2	2	1	4	2	0	0	0	1	0	0	1	1	67	167	24.0238	1	1	98	3	3	3	4	4	4	4	4	3	4	3	4	4	4	4	4	4	4	5	4	4	4	4	4	4
236	2	2	2501	64	2	2	2	2	6	2	0	0	0	1	0	0	1	1	64	155	26.6389	1	1	84	2	4	3	3	5	3	3	3	3	4	3	3	3	3	4	4	2	4	2	4	4	4	4	4	3
237	2	2	2503	62	2	2	2	1	7	2	1	0	0	1	0	0	1	1	58	150	25.7778	1	1	76	3	3	3	2	4	4	4	4	2	4	2	3	3	3	3	3	3	4	4	4	4	4	4	4	3
238	2	1	2509	56	2	1	2	2	10	2	0	0	0	1	0	0	1	1	67	160	26.1719	5	5	101	3	4	3	3	3	3	3	3	2	2	2	3	3	3	3	3	3	3	3	2	3	4	4	4	3
239	2	1	2504	61	2	2	2	3	10	2	0	0	0	1	0	1	1	1	65	167	23.3067	1	2	80	5	5	5	4	4	4	4	4	2	4	2	5	4	4	4	4	4	5	5	3	4	5	5	4	4
240	2	2	2508	57	1	2	2	1	20	2	0	0	0	1	0	0	1	1	50	163	18.8189	5	1	73	3	2	3	1	3	3	3	4	5	4	2	3	4	4	4	3	4	4	4	4	4	4	3	4	3
241	2	2	2507	58	2	1	2	2	8	2	0	0	0	1	0	0	1	1	64	160	25	1	1	76	4	3	5	3	4	5	4	4	4	5	2	5	5	5	5	5	4	5	5	4	5	5	5	5	2
242	2	2	2510	55	2	2	2	2	2	2	0	0	0	1	0	0	1	1	58	156	23.833	1	1	76	4	5	5	5	5	5	5	5	5	5	3	5	5	5	5	5	2	5	5	4	5	5	1	5	3
378	2	2	2493	72	1	2	2	3	10	2	0	0	0	1	0	1	1	1	60	150	26.6667	1	1	90	4	4	4	4	4	4	4	4	3	4	2	3	3	3	4	4	4	4	4	4	3	3	4	4	2
379	2	2	2502	63	1	2	2	1	20	2	0	0	0	1	0	0	1	1	52	155	21.6441	1	1	92	4	3	3	4	4	4	4	4	3	3	3	3	4	4	4	4	3	3	3	4	4	4	4	4	3
380	2	2	2511	54	1	2	2	1	7	2	0	0	0	1	0	0	1	1	62	150	27.5556	1	1	102	3	2	3	2	4	4	4	4	5	4	5	3	3	3	3	3	3	3	4	3	4	4	4	4	4
381	2	1	2508	57	1	2	2	1	5	2	0	0	0	1	0	0	1	1	66	164	24.539	5	5	92	2	4	1	5	5	5	5	5	3	3	5	3	5	4	5	5	5	5	5	2	5	5	5	5	5
382	2	1	2504	61	1	2	3	1	2	2	0	0	0	1	0	0	1	1	56	165	20.5693	5	5	86	4	5	5	5	5	5	5	5	3	5	1	5	5	5	5	5	5	5	4	4	5	5	1	5	5
383	2	2	2514	51	1	2	2	1	4	2	0	0	0	1	0	0	1	1	57	160	22.2656	1	1	98	5	3	5	3	4	5	5	5	3	5	3	5	5	3	5	5	3	5	5	3	3	5	5	5	5
384	2	2	2512	53	1	2	4	1	3	2	0	0	0	1	0	0	1	1	50	150	22.2222	1	1	73	3	4	3	2	3	3	5	4	3	5	3	2	4	4	4	4	3	4	4	4	4	4	4	4	4
385	2	2	2509	56	1	3	2	1	3	2	0	0	0	1	0	0	1	1	63	155	26.2227	1	2	88	4	3	3	3	3	3	3	4	3	3	4	3	3	3	3	3	2	4	3	3	3	3	3	3	3
386	2	2	2525	40	1	2	3	1	7	2	0	0	0	1	0	0	1	1	58	160	22.6562	1	1	89	3	3	3	4	3	3	4	5	4	4	4	4	4	4	4	5	3	4	2	3	3	4	4	4	5
387	2	2	2517	48	1	2	4	1	11	2	0	0	0	1	0	0	1	1	60	153	25.6312	1	5	93	3	4	5	3	5	5	5	5	5	5	5	5	5	4	5	5	4	5	5	5	5	5	1	5	5
388	2	2	2518	47	1	2	2	1	4	2	0	0	0	1	0	0	1	1	46	147	21.2874	1	1	73	4	3	4	3	4	4	4	4	3	4	2	4	4	3	3	4	3	4	2	3	4	4	4	4	3
389	2	2	2513	52	1	2	2	1	23	2	0	0	0	1	0	0	1	1	69	156	28.3531	1	1	99	3	5	3	4	3	3	3	4	2	4	3	3	4	4	4	4	3	4	3	3	3	4	3	4	4
390	2	2	2516	49	1	2	2	1	1	2	0	0	0	1	0	0	1	1	70	165	25.7117	1	1	85	3	4	3	4	4	4	4	3	4	3	4	3	3	4	4	3	3	4	4	4	3	4	4	4	3
391	2	1	2504	61	1	2	4	1	7	2	0	0	0	1	0	0	1	1	67	160	26.1719	1	1	90	3	4	3	4	3	3	3	4	5	4	4	3	4	4	3	3	2	4	3	3	3	3	4	4	3
392	2	2	2518	47	1	2	4	1	1	2	0	0	0	1	0	0	1	1	58	155	24.1415	1	1	76	4	4	3	4	4	3	4	4	5	4	2	4	3	3	4	4	3	4	3	3	5	3	5	4	2
393	2	2	2514	51	1	2	2	1	3	2	0	0	0	1	0	0	1	1	70	150	31.1111	1	5	103	4	3	3	3	3	3	3	3	2	3	3	3	3	3	3	3	3	3	3	3	3	3	4	4	3
394	2	1	2510	55	1	2	2	1	3	2	0	0	0	1	0	0	1	1	92	165	33.7925	5	2	117	3	3	4	1	5	4	4	4	2	4	2	4	4	4	4	4	3	4	4	4	4	4	5	4	3
395	2	1	2503	62	1	2	2	1	3	2	0	0	0	1	0	0	1	1	61	172	20.6193	1	3	83	4	3	4	4	4	4	4	4	3	4	2	4	4	4	4	4	3	4	3	4	4	4	4	4	3
396	2	1	2513	52	1	2	4	1	3	2	0	0	0	1	0	0	1	1	64	162	24.3865	1	5	86	4	2	4	4	4	4	4	4	3	4	3	4	4	4	4	4	4	3	4	3	3	4	4	4	3
397	2	1	2512	53	1	2	2	1	10	2	0	0	0	1	0	0	1	1	74	170	25.6055	2	5	92	3	2	4	5	4	4	4	4	4	4	2	2	4	4	4	4	4	4	4	4	4	4	4	5	4
398	2	1	2507	58	1	2	2	1	4	2	0	0	0	1	0	0	1	1	73	162	27.8159	3	5	92	4	2	4	5	4	4	4	4	3	4	2	4	4	4	3	4	4	4	4	4	4	4	5	5	4
399	2	2	2504	61	1	1	2	1	3	2	0	0	0	1	0	0	1	1	36	140	18.3673	1	1	62	2	2	4	4	4	4	5	5	4	4	2	4	4	4	4	4	4	4	5	5	5	5	5	5	3
400	2	2	2514	51	1	2	2	1	2	2	0	0	0	1	0	0	1	1	58	150	25.7778	1	5	90	3	5	3	3	3	4	4	4	5	4	3	4	4	4	3	3	3	4	4	4	4	4	4	4	3
401	2	2	2511	54	1	2	4	2	4	2	0	0	0	1	0	0	1	1	60	144	28.9352	1	1	93	3	2	4	5	4	4	4	3	3	1	4	5	4	4	4	5	3	3	3	2	5	4	3	4	1
402	2	2	2517	48	1	2	2	1	3	2	0	0	0	1	0	0	1	1	50	150	22.2222	1	1	85	3	3	3	3	4	4	4	4	5	3	3	2	3	3	3	2	3	3	1	3	3	3	3	3	2
403	2	2	2522	43	1	2	4	1	1	2	0	0	0	1	0	0	1	1	74	150	32.8889	1	1	101	4	3	4	5	4	4	4	4	4	4	4	3	3	4	4	4	4	4	4	4	4	3	3	4	3
404	2	2	2505	60	1	4	2	3	1	2	0	0	0	1	0	0	1	1	53	160	20.7031	1	3	98	3	3	3	5	3	4	4	4	3	4	2	3	3	3	4	4	4	3	1	3	3	3	4	3	3
405	2	2	2515	50	1	2	2	1	2	2	0	0	0	1	0	0	2	1	63	165	23.1405	1	1	92	3	4	3	4	4	4	4	3	4	4	2	4	4	4	4	4	4	4	3	4	4	4	4	4	5
406	2	2	2512	53	1	2	2	1	10	2	0	0	0	1	0	0	1	1	58	153	24.7768	1	1	87	3	3	3	3	5	4	4	4	3	4	2	4	4	5	4	4	4	5	5	4	4	5	4	4	4
407	2	2	2526	39	1	2	2	1	2	2	0	0	0	1	0	0	1	1	50	157	20.2848	1	1	74	5	4	2	5	5	5	5	5	5	5	2	5	5	5	5	5	3	5	3	5	5	5	5	5	5
408	2	2	2515	50	1	2	2	1	14	2	0	0	0	1	0	0	1	1	45	150	20	1	1	78	3	3	3	3	3	4	4	4	5	3	4	3	3	3	4	4	3	4	4	3	4	4	4	4	4
409	2	1	2515	50	1	2	4	1	2	2	0	0	0	1	0	0	1	1	80	169	28.0102	5	5	101	3	2	3	3	3	3	3	3	2	3	4	4	4	3	4	4	3	4	4	4	4	4	4	4	5
410	2	2	2515	50	1	2	2	1	2	2	0	0	0	1	0	0	1	1	57	157	23.1247	1	1	86	3	3	2	4	3	3	4	4	4	3	4	3	3	3	3	3	3	4	3	3	3	3	3	3	3
411	2	1	2516	49	1	2	4	1	2	2	0	0	0	1	0	0	1	1	72	158	28.8415	1	1	92	3	4	3	4	4	4	4	4	4	3	2	3	4	4	4	4	4	4	4	3	4	4	4	4	4
412	2	2	2517	48	1	2	3	3	7	2	0	0	0	1	0	0	1	1	62	156	25.4767	1	1	96	3	3	3	4	3	3	4	5	4	4	3	3	4	4	4	4	3	5	4	4	4	4	4	4	4
413	2	2	2502	63	1	2	2	1	20	2	0	0	0	1	0	0	1	1	54	155	22.4766	1	1	88	4	2	4	4	4	4	4	4	4	4	4	4	4	4	4	4	3	4	4	4	4	4	4	4	4
414	2	1	2518	47	1	2	2	2	10	2	0	0	0	1	0	0	1	1	62	161	23.9188	5	2	87	4	3	4	4	4	4	4	4	5	4	4	4	4	4	4	4	4	4	4	4	4	4	4	4	4
415	2	2	2511	54	1	2	2	7	10	2	0	0	0	1	0	0	1	1	57	152	24.6711	1	1	86	4	5	4	3	4	4	4	4	5	4	2	4	4	4	4	4	4	4	4	4	4	4	4	4	4
416	2	2	2492	73	1	2	2	1	20	2	0	0	0	1	0	0	1	1	60	150	26.6667	1	1	92	3	3	3	3	3	4	4	4	3	3	3	4	4	4	4	4	3	4	4	3	4	3	4	3	3
417	2	2	2523	42	1	2	2	1	3	2	0	0	0	1	0	0	1	1	63	150	28	1	1	93	4	3	4	4	4	4	4	4	4	4	3	4	4	4	4	4	3	5	4	4	4	4	4	4	4
418	2	2	2537	28	1	2	2	1	8	2	0	0	0	1	0	0	1	1	44	145	20.9275	1	1	75	4	4	4	2	3	4	4	4	4	3	3	3	4	4	4	4	4	5	4	4	4	4	4	4	4
419	2	2	2512	53	1	2	2	1	2	2	0	0	0	1	0	0	1	1	68	155	28.3039	1	1	96	3	5	3	4	4	4	4	4	5	4	2	4	4	4	4	4	4	5	4	4	4	4	4	4	4
420	2	2	2503	62	1	2	2	1	7	2	0	0	0	1	0	0	1	1	54	140	27.551	1	1	72	4	2	4	4	4	4	4	3	5	3	3	3	3	4	4	4	4	4	4	4	4	4	4	4	3
421	2	1	2508	57	1	2	2	1	5	2	0	0	0	1	0	0	1	1	59	168	20.9042	1	1	79	3	5	4	4	4	4	4	3	5	3	4	3	3	3	4	3	3	3	3	3	3	4	4	4	3
422	2	2	2496	69	1	2	2	2	1	2	0	0	0	1	0	0	1	1	53	160	20.7031	1	1	86	4	5	4	4	4	4	3	4	4	4	4	3	3	3	3	4	4	4	4	4	4	4	4	4	3
423	2	2	2499	66	1	3	2	1	16	2	0	0	0	1	0	0	1	1	63	140	32.1429	1	1	108	3	1	3	3	3	3	4	4	4	4	1	3	3	3	3	3	4	4	3	3	3	4	4	4	3
424	2	1	2510	55	1	2	4	1	5	2	0	0	0	1	0	0	1	1	58	170	20.0692	1	1	78	3	5	3	4	4	3	3	3	4	3	2	3	3	3	2	3	3	3	3	4	3	3	3	5	3
425	2	2	2499	66	1	2	2	1	1	2	0	0	0	1	0	0	1	1	56	150	24.8889	1	1	76	3	4	3	4	3	3	3	3	3	3	4	3	3	4	4	4	3	4	4	4	4	4	3	4	3
426	2	2	2493	72	1	4	2	1	1	2	0	0	0	1	0	0	1	1	60	156	24.6548	1	1	78	2	2	3	4	4	4	4	3	2	3	2	3	3	4	4	4	3	4	4	4	4	2	3	3	3
427	2	2	2502	63	1	2	2	1	4	2	0	0	0	1	0	0	1	1	61	172	20.6193	5	1	87	3	3	3	3	3	3	3	2	4	3	3	2	4	4	3	4	4	4	4	4	4	4	4	4	3
428	2	2	2511	54	1	2	3	1	3	2	0	0	0	1	0	1	1	1	68	156	27.9421	1	1	89	2	4	4	4	3	3	2	2	4	3	4	2	3	3	3	4	3	3	3	3	3	4	4	4	3
429	2	2	2495	70	1	4	4	1	15	2	0	0	0	1	0	0	1	1	55	150	24.4444	1	1	89	3	2	3	4	3	3	3	3	3	3	4	3	3	3	4	3	3	4	3	3	3	3	3	5	3
430	2	1	2497	68	1	2	2	1	3	2	0	0	0	1	0	0	1	2	72	163	27.0993	1	1	99	3	5	3	4	3	3	4	4	5	4	3	3	4	4	4	3	3	4	4	4	4	4	4	4	3
431	2	1	2504	61	1	2	4	1	6	2	0	0	0	1	0	0	1	1	92	175	30.0408	1	1	105	4	4	4	4	4	4	4	4	5	4	4	4	4	4	4	4	4	5	4	4	4	4	4	4	4
432	2	1	2508	57	1	2	2	1	7	2	0	0	0	1	0	0	1	1	60	163	22.5827	1	1	88	3	3	4	4	3	3	3	3	4	4	3	4	4	4	4	4	3	5	4	3	4	4	4	4	3
557	2	1	2504	61	1	2	2	1	15	2	0	0	0	1	0	0	1	1	61	158	24.4352	5	1	88	3	4	3	4	3	3	3	4	5	3	3	3	3	3	3	4	3	4	3	3	4	3	3	3	3
558	2	2	2508	57	1	2	2	1	13	2	0	0	0	1	0	0	1	1	49	150	21.7778	1	1	71	2	3	3	4	4	4	4	4	5	3	4	3	3	3	4	3	3	4	4	3	3	3	3	3	3
559	2	1	2501	64	1	2	2	1	11	2	0	0	0	1	0	0	1	1	60	160	23.4375	1	5	90	3	1	5	4	5	5	4	4	4	5	4	5	5	5	5	4	3	5	5	2	5	5	5	5	5
560	2	2	2506	59	1	2	2	1	10	2	0	0	0	1	0	0	1	1	58	167	20.7967	1	1	79	3	4	3	4	3	4	4	5	4	3	5	3	5	3	3	4	5	4	5	5	5	5	5	5	3
561	2	2	2506	59	1	2	2	1	10	2	0	0	0	1	0	0	1	1	49	150	21.7778	1	1	83	4	3	4	4	5	4	4	4	5	4	4	4	4	4	4	4	4	4	4	3	5	4	5	4	3
562	2	2	2510	55	1	2	2	1	4	2	0	0	0	1	0	0	1	1	58	150	25.7778	1	1	86	2	4	3	3	4	4	5	5	5	4	5	4	4	4	4	4	4	4	4	2	5	4	4	4	4
563	2	2	2495	70	1	2	2	1	5	2	0	0	0	1	0	0	1	1	52	150	23.1111	1	1	90	3	3	3	4	4	4	4	4	5	4	4	4	4	3	4	4	4	4	4	4	3	4	4	4	3
564	2	2	2514	51	1	2	2	7	16	2	0	0	0	1	0	0	1	1	64	162	24.3865	1	1	94	3	4	3	3	3	3	3	3	4	4	2	3	3	3	4	3	3	4	4	4	4	4	3	4	4
565	2	2	2494	72	1	4	2	1	20	2	0	0	0	1	0	0	1	1	44	150	19.5556	1	1	82	3	2	2	2	3	1	5	5	5	5	3	4	5	5	5	5	5	5	1	5	5	5	2	5	3
566	2	2	2496	69	1	4	2	1	1	2	0	0	0	1	0	0	1	1	49	155	20.3954	1	1	98	3	3	4	4	4	4	4	5	5	4	5	4	4	4	4	4	3	4	4	4	4	4	5	5	3
567	2	2	2503	62	1	4	2	1	10	2	0	0	0	1	0	0	1	1	50	165	18.3655	1	1	77	4	3	3	4	4	4	4	4	3	3	5	4	4	4	3	3	3	3	4	4	4	3	3	3	3
568	2	1	2513	52	1	2	2	1	2	2	0	0	0	1	0	0	1	1	78	170	26.9896	1	1	98	3	4	3	3	3	3	4	4	3	3	1	3	4	4	4	4	3	4	3	4	4	4	4	4	4
569	2	2	2498	67	1	2	6	4	20	2	0	0	0	1	0	0	2	1	45	152	19.4771	1	1	69	3	5	3	2	3	3	3	3	4	3	5	3	4	4	4	4	3	4	4	3	3	4	3	3	4
570	2	2	2498	67	1	4	2	1	1	2	0	0	0	1	0	0	1	1	45	150	20	1	1	83	4	3	3	4	4	3	4	3	3	3	4	4	3	4	4	3	3	3	4	4	3	4	4	4	4
571	2	2	2495	70	1	2	2	1	7	2	0	0	0	1	0	0	1	1	40	145	19.025	1	1	80	4	4	3	3	3	4	4	3	4	4	5	4	4	4	3	3	2	4	3	3	3	4	4	4	3
572	2	2	2498	67	1	2	6	4	13	2	0	0	0	1	0	0	1	1	70	140	35.7143	1	1	93	5	3	5	4	5	5	5	5	1	5	1	5	5	5	5	5	5	4	5	4	5	5	5	5	2
573	2	2	2498	67	1	4	2	1	17	2	0	0	0	1	0	0	1	1	49	145	23.3056	1	1	86	3	2	3	3	3	3	3	3	1	3	4	3	4	3	5	4	3	5	4	4	5	5	5	5	3
574	2	1	2497	68	1	2	6	4	11	2	0	0	0	1	0	0	1	1	64	163	24.0882	1	1	87	3	4	4	2	4	4	4	4	5	4	5	4	3	2	4	4	3	4	4	3	4	4	4	4	4
575	2	2	2498	67	1	2	2	1	10	2	0	0	0	1	0	0	1	1	53	147	24.5268	1	5	86	4	3	4	3	5	4	5	5	4	4	4	4	4	4	5	5	3	4	4	5	5	4	4	4	2
576	2	2	2499	66	1	2	2	1	24	2	0	0	0	1	0	0	1	1	63	150	28	1	1	97	3	3	3	3	3	3	4	4	2	3	2	3	3	3	3	3	3	2	2	3	3	2	2	2	3
577	2	2	2496	69	1	2	6	6	7	2	0	0	0	1	0	0	2	1	67	157	27.1816	1	1	89	4	5	3	5	4	4	4	4	5	5	4	4	4	4	5	5	4	3	4	4	5	4	4	4	4
578	2	2	2490	75	1	4	2	7	1	2	0	0	0	1	0	0	1	1	40	150	17.7778	1	1	70	3	3	2	3	4	3	5	3	4	4	1	2	3	3	4	4	3	4	2	3	3	2	2	2	2
579	2	2	2498	67	1	1	2	1	10	2	0	0	0	1	0	1	1	1	52	152	22.5069	1	1	76	3	3	5	4	5	5	5	4	3	5	3	5	4	4	4	5	3	5	2	4	5	5	4	5	3
580	2	2	2500	65	1	4	2	6	17	2	0	0	0	1	0	0	1	1	59	159	23.3377	1	1	90	3	3	4	5	3	5	5	5	3	5	3	5	5	5	5	5	4	5	5	4	3	5	5	5	3
581	2	2	2499	66	1	2	2	1	4	2	0	0	0	1	0	0	1	1	45	145	21.4031	1	5	80	3	5	5	5	5	5	5	5	5	5	4	5	5	5	5	5	3	5	5	5	5	5	5	5	4
582	2	2	2510	55	1	2	2	1	3	2	0	0	0	1	0	0	1	1	52	150	23.1111	1	5	95	4	3	4	5	5	4	5	5	3	5	2	5	5	5	5	5	3	5	5	5	5	5	5	5	2
583	2	2	2516	49	1	2	4	1	3	2	0	0	0	1	0	0	2	1	82	163	30.863	1	1	90	4	5	4	4	4	4	4	4	2	4	4	4	4	4	4	4	4	4	4	4	4	4	4	4	3
584	2	2	2536	29	1	1	4	1	1	2	0	0	0	1	0	0	1	1	55	150	24.4444	1	1	81	4	4	4	4	4	4	4	4	5	4	3	4	4	4	4	4	4	4	4	4	4	4	4	4	3
585	2	2	2517	48	1	2	4	2	2	2	0	0	0	1	0	0	1	1	95	155	39.5421	1	1	114	3	3	4	4	3	4	3	3	4	4	2	4	4	4	4	4	3	4	3	4	4	4	4	4	4
586	2	2	2508	57	1	2	2	1	5	2	0	0	0	1	0	0	1	1	77	155	32.0499	1	1	104	3	2	3	3	3	3	3	3	5	3	4	3	3	3	3	4	3	4	3	3	4	3	3	3	3
587	2	2	2506	59	1	2	2	1	3	2	0	0	0	1	0	1	1	1	70	155	29.1363	1	1	97	3	3	3	4	4	4	5	4	4	4	3	4	3	4	4	4	4	5	3	4	4	2	4	2	4
588	2	2	2517	48	1	2	2	1	3	2	0	0	0	1	0	0	1	1	62	162	23.6244	1	1	69	3	3	3	4	3	4	4	3	3	4	3	3	4	4	4	3	2	3	1	3	3	4	3	4	4
589	2	2	2507	58	1	2	2	1	3	2	0	0	0	1	0	0	1	1	65	155	27.0552	1	1	88	4	2	3	4	4	4	4	4	5	4	3	4	3	3	4	4	3	4	4	4	4	4	4	4	4
590	2	2	2522	43	1	5	2	1	3	2	0	0	0	1	0	0	2	1	55	150	24.4444	1	1	94	3	4	4	3	2	4	3	3	3	3	4	3	1	1	3	3	2	4	1	4	4	3	4	3	4
591	2	2	2509	56	1	2	2	1	3	2	0	0	0	1	0	0	1	1	54	155	22.4766	1	1	88	3	5	3	4	4	4	3	3	5	4	2	4	3	3	4	3	4	4	4	4	4	4	3	4	3
592	2	2	2508	57	1	2	2	1	17	2	1	0	0	1	0	0	1	1	69	162	26.2917	1	3	87	3	3	4	4	4	4	4	4	4	4	2	4	4	4	4	4	3	4	4	4	4	3	4	3	4
593	2	2	2505	60	1	2	2	1	3	2	0	0	0	1	0	1	1	1	60	150	26.6667	1	1	92	3	3	3	3	3	4	5	5	4	3	1	3	5	5	3	3	3	4	5	3	3	5	3	5	3
594	2	2	2507	58	1	2	2	1	15	2	0	1	0	1	0	1	1	1	62	156	25.4767	1	5	87	4	3	3	5	5	4	3	5	4	5	3	4	3	3	5	4	3	5	5	4	5	5	5	4	4
595	2	2	2508	57	1	2	2	1	3	2	0	0	0	1	0	0	1	1	59	150	26.2222	1	5	90	3	2	3	3	4	4	4	4	5	3	5	4	4	4	4	4	3	4	2	3	4	5	5	5	4
596	2	2	2509	56	1	2	2	1	19	2	0	0	0	1	0	1	1	1	64	155	26.6389	1	1	91	2	5	5	3	3	5	5	4	5	3	5	4	4	4	4	4	3	5	5	5	4	5	5	5	4
128	2	1	2490	75	1	2	2	6	#NULL!	1	#NULL!	#NULL!	#NULL!	#NULL!	#NULL!	#NULL!	1	1	56	164	20.8209	5	5	83	4	2	4	5	4	4	4	4	2	4	2	4	4	4	4	3	4	4	4	4	4	4	4	4	3
129	2	1	2499	66	1	4	2	1	#NULL!	1	#NULL!	#NULL!	#NULL!	#NULL!	#NULL!	#NULL!	1	1	50	165	18.3655	5	5	77	3	3	4	4	4	4	4	4	3	4	3	4	4	4	3	3	3	3	4	4	4	4	4	4	3
130	2	1	2490	75	1	2	4	1	#NULL!	1	#NULL!	#NULL!	#NULL!	#NULL!	#NULL!	#NULL!	1	1	70	175	22.8571	1	4	82	4	2	4	4	4	4	4	4	2	3	2	4	4	4	4	4	3	4	4	3	4	4	4	4	4
131	2	1	2518	47	1	2	2	1	#NULL!	1	#NULL!	#NULL!	#NULL!	#NULL!	#NULL!	#NULL!	1	1	69	159	27.2932	1	5	93	4	2	4	4	4	4	4	4	2	4	2	4	3	4	5	5	4	4	4	4	4	4	5	5	3
132	2	1	2497	68	1	2	2	1	#NULL!	1	#NULL!	#NULL!	#NULL!	#NULL!	#NULL!	#NULL!	1	1	48	160	18.75	1	1	68	5	2	1	5	5	5	5	5	2	1	2	1	3	3	3	4	4	3	2	2	3	2	3	3	1
133	2	1	2502	63	1	3	2	1	#NULL!	1	#NULL!	#NULL!	#NULL!	#NULL!	#NULL!	#NULL!	1	1	68	165	24.977	5	1	98	5	2	3	5	5	5	5	5	2	3	3	5	3	3	5	5	5	4	4	2	3	3	5	5	5
134	2	1	2493	72	1	2	4	1	#NULL!	1	#NULL!	#NULL!	#NULL!	#NULL!	#NULL!	#NULL!	1	1	75	172	25.3515	4	4	94	3	1	3	3	3	3	3	3	2	3	1	3	3	3	4	4	4	4	4	4	4	4	4	4	3
135	2	1	2498	67	1	5	2	1	#NULL!	1	#NULL!	#NULL!	#NULL!	#NULL!	#NULL!	#NULL!	1	1	75	172	25.3515	5	1	79	4	3	3	4	4	4	4	4	3	4	3	4	4	5	4	4	3	4	4	4	4	3	5	3	3
136	2	1	2500	65	1	2	2	1	#NULL!	1	#NULL!	#NULL!	#NULL!	#NULL!	#NULL!	#NULL!	2	1	50	160	19.5312	1	5	76	4	2	4	5	5	5	5	4	3	4	2	5	5	5	4	5	4	3	4	4	4	4	5	5	4
137	2	2	2515	50	1	2	3	1	#NULL!	1	#NULL!	#NULL!	#NULL!	#NULL!	#NULL!	#NULL!	1	1	78	158	31.245	1	1	97	4	2	4	4	4	4	4	4	3	4	3	4	4	4	4	4	3	4	4	4	3	4	4	4	4
138	2	2	2515	50	1	2	2	1	#NULL!	1	#NULL!	#NULL!	#NULL!	#NULL!	#NULL!	#NULL!	2	1	63	160	24.6094	1	1	82	5	2	5	5	5	4	5	5	2	5	2	5	4	4	4	4	4	5	4	4	4	5	5	5	3
139	2	2	2509	56	1	2	2	1	#NULL!	1	#NULL!	#NULL!	#NULL!	#NULL!	#NULL!	#NULL!	1	1	75	160	29.2969	1	1	110	5	2	4	5	3	4	4	5	2	4	3	4	4	4	4	4	4	4	4	4	4	4	4	5	4
140	2	2	2505	60	1	4	6	1	#NULL!	1	#NULL!	#NULL!	#NULL!	#NULL!	#NULL!	#NULL!	1	1	58	155	24.1415	1	1	84	3	2	5	4	4	5	5	5	2	5	2	4	5	5	5	5	3	3	4	5	5	4	4	5	5
141	2	2	2509	56	1	2	2	1	#NULL!	1	#NULL!	#NULL!	#NULL!	#NULL!	#NULL!	#NULL!	1	1	80	157	32.4557	1	1	95	3	2	5	3	5	5	5	5	2	1	2	5	5	5	5	5	5	5	4	5	5	5	5	5	5
142	2	2	2515	50	1	2	2	1	#NULL!	1	#NULL!	#NULL!	#NULL!	#NULL!	#NULL!	#NULL!	1	1	55	145	26.1593	1	1	90	3	3	1	3	3	5	5	5	3	4	3	5	5	5	4	5	5	4	4	4	5	5	4	5	4
143	2	2	2512	53	1	2	3	1	#NULL!	1	#NULL!	#NULL!	#NULL!	#NULL!	#NULL!	#NULL!	1	1	71	150	31.5556	1	1	69	3	3	3	4	3	4	3	3	2	3	3	2	4	4	3	4	2	2	3	3	3	3	4	3	2
144	2	2	2511	54	1	3	2	1	#NULL!	1	#NULL!	#NULL!	#NULL!	#NULL!	#NULL!	#NULL!	1	1	77	156	31.6404	1	1	103	4	2	3	3	3	4	4	2	2	3	3	3	3	3	4	3	3	3	5	3	5	5	5	5	5
145	2	2	2514	51	1	4	2	1	#NULL!	1	#NULL!	#NULL!	#NULL!	#NULL!	#NULL!	#NULL!	2	1	46	150	20.4444	1	1	76	3	3	4	3	4	3	4	5	3	4	3	4	4	4	4	4	3	4	4	2	4	4	5	4	2
146	2	2	2513	52	1	2	2	2	#NULL!	2	0	0	0	0	0	1	1	1	73	155	30.385	1	1	100	4	3	3	5	4	4	3	5	3	4	3	4	5	5	5	4	4	4	5	5	4	3	5	4	5
147	2	2	2515	50	1	2	3	1	#NULL!	1	#NULL!	#NULL!	#NULL!	#NULL!	#NULL!	#NULL!	1	1	70	153	29.903	1	5	110	4	2	4	4	4	4	4	3	2	4	2	3	4	4	4	4	3	3	3	4	4	4	4	4	4
148	2	2	2512	53	1	2	4	1	#NULL!	1	#NULL!	#NULL!	#NULL!	#NULL!	#NULL!	#NULL!	1	1	56	146	26.2713	1	4	87	5	3	5	3	5	5	5	5	3	5	2	5	4	4	4	5	4	5	3	4	4	4	5	5	4
149	2	2	2517	48	1	2	4	1	#NULL!	1	#NULL!	#NULL!	#NULL!	#NULL!	#NULL!	#NULL!	1	2	65	155	27.0552	1	1	90	1	3	5	5	5	5	5	5	2	1	2	4	5	4	5	5	3	5	5	5	5	5	5	5	4
150	2	1	2510	55	1	2	4	1	#NULL!	1	#NULL!	#NULL!	#NULL!	#NULL!	#NULL!	#NULL!	1	1	52	159	20.5688	1	5	78	4	2	4	3	4	4	4	4	3	4	3	4	4	4	4	4	4	4	4	3	4	4	4	4	4
151	2	2	2512	53	1	2	4	2	#NULL!	1	#NULL!	#NULL!	#NULL!	#NULL!	#NULL!	#NULL!	1	1	60	165	22.0386	1	5	85	5	2	5	5	5	5	5	5	3	5	3	5	5	5	5	5	2	4	5	5	3	5	5	5	5
152	2	2	2503	62	1	4	2	1	#NULL!	1	#NULL!	#NULL!	#NULL!	#NULL!	#NULL!	#NULL!	1	1	58	145	27.5862	1	1	97	5	2	5	5	5	5	5	5	3	5	2	5	5	5	5	5	5	5	5	5	5	5	5	5	5
153	2	2	2499	66	1	2	2	1	#NULL!	1	#NULL!	#NULL!	#NULL!	#NULL!	#NULL!	#NULL!	1	1	60	153	25.6312	1	1	98	3	3	4	4	4	3	3	3	2	4	3	3	3	3	3	3	3	3	3	3	3	3	4	4	4
154	2	2	2501	64	1	2	2	1	#NULL!	2	0	0	0	0	0	1	1	1	45	148	20.5442	1	1	87	4	2	4	4	3	3	3	3	3	4	3	4	4	4	4	4	4	4	3	3	4	4	4	4	4
155	2	2	2503	62	1	5	2	1	#NULL!	1	#NULL!	#NULL!	#NULL!	#NULL!	#NULL!	#NULL!	1	1	56	152	24.2382	1	1	92	3	4	3	4	4	4	4	4	4	3	4	3	3	4	4	4	3	4	3	4	3	4	3	3	3
156	2	2	2502	63	1	2	2	1	#NULL!	1	#NULL!	#NULL!	#NULL!	#NULL!	#NULL!	#NULL!	1	1	56	143	27.3852	1	1	97	3	3	3	3	3	3	3	3	4	2	4	4	4	4	4	4	4	3	4	3	4	4	4	4	4
157	2	2	2505	60	1	2	2	1	#NULL!	2	0	0	0	0	0	1	1	1	70	153	29.903	1	1	112	3	2	3	3	4	4	2	3	4	2	3	4	4	4	2	3	3	3	3	4	3	3	3	3	3
158	2	2	2503	62	1	1	2	1	#NULL!	2	0	0	0	0	0	1	1	1	45	147	20.8247	1	1	75	3	3	4	3	4	4	4	4	5	4	4	4	4	4	4	4	3	4	4	4	4	4	4	4	4
159	2	2	2503	62	1	4	2	1	#NULL!	2	0	0	0	0	0	1	1	1	43	160	16.7969	1	5	81	5	3	3	5	5	4	4	4	5	2	3	4	4	3	4	4	4	4	4	3	3	2	2	3	1
160	2	2	2500	65	1	2	2	1	#NULL!	2	0	0	0	0	0	1	1	1	70	150	31.1111	1	5	101	3	4	3	4	4	4	4	4	5	3	3	4	2	2	3	3	3	3	3	2	3	2	3	3	1
161	2	2	2505	60	1	2	2	1	#NULL!	1	#NULL!	#NULL!	#NULL!	#NULL!	#NULL!	#NULL!	1	1	54	150	24	1	1	92	4	4	4	4	4	4	4	4	4	4	3	4	3	4	4	4	2	4	2	4	4	4	4	4	4
162	2	2	2501	64	1	2	2	1	#NULL!	2	0	0	0	0	0	1	1	1	35	153	14.9515	1	1	63	5	3	2	5	5	4	5	5	5	4	2	5	4	4	4	4	4	4	4	3	4	3	3	3	1
163	2	2	2502	63	1	2	2	1	#NULL!	1	#NULL!	#NULL!	#NULL!	#NULL!	#NULL!	#NULL!	1	1	56	160	21.875	1	1	82	5	4	5	5	5	5	5	5	4	5	4	5	5	5	5	5	2	5	5	4	5	3	5	2	3
164	2	1	2501	64	1	2	4	7	#NULL!	1	#NULL!	#NULL!	#NULL!	#NULL!	#NULL!	#NULL!	1	1	90	156	36.9822	1	1	117	3	5	4	4	4	4	4	3	5	4	4	4	4	4	4	4	3	3	4	4	4	4	4	4	4
165	2	2	2502	63	1	2	2	1	#NULL!	1	#NULL!	#NULL!	#NULL!	#NULL!	#NULL!	#NULL!	1	1	41	148	18.718	1	1	72	4	4	3	4	4	4	4	4	4	4	3	4	4	4	4	4	4	4	3	4	4	4	4	4	3
166	2	2	2498	67	1	4	2	1	#NULL!	1	#NULL!	#NULL!	#NULL!	#NULL!	#NULL!	#NULL!	1	1	51	155	21.2279	1	1	83	4	5	4	4	4	4	4	4	5	1	4	4	4	4	4	4	3	4	4	4	4	4	4	4	2
167	2	2	2501	64	1	2	2	6	#NULL!	1	#NULL!	#NULL!	#NULL!	#NULL!	#NULL!	#NULL!	1	1	53	154	22.3478	1	1	80	3	3	4	4	4	4	4	4	3	4	3	4	4	4	4	4	4	4	4	4	4	4	4	5	4
168	2	1	2509	56	1	1	2	1	#NULL!	1	#NULL!	#NULL!	#NULL!	#NULL!	#NULL!	#NULL!	1	1	49	150	21.7778	1	1	75	3	3	3	2	3	3	4	5	5	2	2	4	3	3	4	3	3	4	5	3	4	3	4	5	5
169	2	1	2510	55	1	3	2	1	#NULL!	1	#NULL!	#NULL!	#NULL!	#NULL!	#NULL!	#NULL!	1	1	68	150	30.2222	1	1	99	2	1	3	4	2	3	3	5	5	4	1	4	3	3	4	5	3	5	3	4	4	3	5	4	1
170	2	1	2509	56	1	5	2	1	#NULL!	1	#NULL!	#NULL!	#NULL!	#NULL!	#NULL!	#NULL!	1	1	71	151	31.139	1	5	92	3	4	4	4	4	4	4	4	5	4	4	4	4	3	3	3	2	3	2	4	4	4	4	4	2
171	2	1	2501	64	1	2	2	1	#NULL!	1	#NULL!	#NULL!	#NULL!	#NULL!	#NULL!	#NULL!	1	2	56	160	21.875	5	4	79	4	4	4	4	4	4	4	4	5	4	4	4	4	4	4	5	5	5	4	4	4	5	4	5	4
172	2	1	2503	62	1	2	3	1	#NULL!	1	#NULL!	#NULL!	#NULL!	#NULL!	#NULL!	#NULL!	1	1	60	159	23.7332	1	1	85	3	2	4	3	4	4	4	4	2	4	4	4	4	4	4	4	4	4	4	3	4	4	4	5	4
173	2	1	2509	56	1	2	2	1	#NULL!	1	#NULL!	#NULL!	#NULL!	#NULL!	#NULL!	#NULL!	1	1	63	156	25.8876	1	1	91	5	3	3	5	5	4	3	3	3	5	2	3	3	3	5	5	5	4	3	3	3	3	5	5	3
174	2	2	2495	70	1	3	2	1	#NULL!	1	#NULL!	#NULL!	#NULL!	#NULL!	#NULL!	#NULL!	1	1	50	150	22.2222	1	1	90	4	3	4	5	5	5	5	5	5	1	2	4	4	4	4	4	4	4	5	4	4	4	4	5	3
175	2	2	2492	73	1	2	2	7	#NULL!	1	#NULL!	#NULL!	#NULL!	#NULL!	#NULL!	#NULL!	1	1	64	160	25	1	1	90	3	2	3	3	3	3	3	3	3	3	2	4	4	4	4	4	3	4	3	3	4	4	4	4	3
177	2	2	2492	73	1	2	2	3	#NULL!	2	0	0	0	0	0	1	1	1	53	150	23.5556	1	4	81	3	5	4	3	4	4	4	4	5	4	4	4	3	3	3	3	3	4	3	4	3	4	3	3	3
178	2	2	2493	72	1	2	2	1	#NULL!	1	#NULL!	#NULL!	#NULL!	#NULL!	#NULL!	#NULL!	1	1	50	153	21.3593	1	1	90	4	4	4	4	4	4	4	4	5	4	5	4	3	4	4	4	4	4	4	4	4	3	4	3	3
179	2	2	2492	73	1	4	1	3	#NULL!	1	#NULL!	#NULL!	#NULL!	#NULL!	#NULL!	#NULL!	1	1	39	154	16.4446	1	1	68	5	5	1	5	5	4	4	4	5	3	5	3	2	2	3	4	4	2	2	3	3	2	2	4	1
180	2	2	2500	65	1	4	2	1	#NULL!	2	0	0	0	0	0	1	1	1	60	150	26.6667	1	1	106	3	2	3	4	4	4	2	4	3	3	2	2	3	4	3	2	2	4	2	3	4	3	2	2	3
181	2	2	2494	71	1	2	2	6	#NULL!	1	#NULL!	#NULL!	#NULL!	#NULL!	#NULL!	#NULL!	1	1	46	181	14.0411	1	4	82	3	4	3	4	3	3	3	3	4	3	4	3	4	3	3	3	4	4	4	4	4	4	3	3	3
182	2	2	2495	70	1	2	2	6	#NULL!	1	#NULL!	#NULL!	#NULL!	#NULL!	#NULL!	#NULL!	1	1	30	135	16.4609	1	1	78	3	4	3	4	3	3	3	3	5	3	4	3	4	3	3	3	4	4	4	4	4	4	3	3	3
183	2	2	2493	72	1	2	2	7	#NULL!	1	#NULL!	#NULL!	#NULL!	#NULL!	#NULL!	#NULL!	2	2	51	150	22.6667	1	1	83	5	5	1	2	4	4	4	4	4	4	3	2	2	2	3	4	4	2	2	1	2	2	2	4	1
184	2	2	2494	71	1	4	2	1	#NULL!	1	#NULL!	#NULL!	#NULL!	#NULL!	#NULL!	#NULL!	1	1	54	152	23.3726	1	1	83	3	4	4	4	3	4	4	4	3	3	4	4	4	4	4	3	3	4	4	4	3	4	4	4	3
185	2	1	2490	75	1	4	2	1	#NULL!	1	#NULL!	#NULL!	#NULL!	#NULL!	#NULL!	#NULL!	1	1	53	165	19.4674	1	1	78	5	5	2	5	5	5	5	5	5	4	2	3	3	3	3	4	4	3	3	1	2	2	1	2	1
186	2	2	2495	70	1	2	2	7	#NULL!	2	0	0	0	0	0	1	1	1	65	150	28.8889	1	1	102	4	4	2	2	4	4	4	4	4	3	4	3	3	1	3	3	3	3	3	1	3	3	1	4	1
187	2	2	2491	74	1	2	2	1	#NULL!	1	#NULL!	#NULL!	#NULL!	#NULL!	#NULL!	#NULL!	1	1	60	159	23.7332	1	1	84	3	5	3	4	4	4	4	4	5	4	4	4	4	4	4	4	4	4	4	4	4	4	4	4	3
188	2	2	2491	74	1	4	2	6	#NULL!	1	#NULL!	#NULL!	#NULL!	#NULL!	#NULL!	#NULL!	1	1	45	155	18.7305	1	1	92	4	4	4	3	5	4	5	5	2	4	2	4	5	5	5	5	3	5	5	4	4	4	5	4	3
189	2	2	2492	73	1	2	2	7	#NULL!	1	#NULL!	#NULL!	#NULL!	#NULL!	#NULL!	#NULL!	1	1	57	154	24.0344	1	5	88	4	4	2	5	4	4	4	4	5	2	4	4	3	3	3	4	4	3	3	1	3	3	1	3	1
190	2	2	2494	71	1	4	2	2	#NULL!	1	#NULL!	#NULL!	#NULL!	#NULL!	#NULL!	#NULL!	1	1	54	145	25.6837	1	5	103	3	4	4	3	3	4	4	4	3	3	4	3	3	3	4	4	4	4	4	4	3	3	4	4	4
191	2	2	2508	57	2	2	2	7	#NULL!	1	#NULL!	#NULL!	#NULL!	#NULL!	#NULL!	#NULL!	1	2	71	160	27.7344	2	5	86	3	4	4	3	4	4	4	4	5	4	2	4	4	4	4	4	3	4	4	4	4	4	4	4	3
192	2	2	2521	44	1	2	4	1	#NULL!	1	#NULL!	#NULL!	#NULL!	#NULL!	#NULL!	#NULL!	1	1	85	160	33.2031	1	5	90	4	3	4	5	4	4	2	4	5	3	2	4	4	4	4	4	3	5	4	3	3	4	4	4	4
193	2	2	2510	55	1	4	4	1	#NULL!	2	0	0	0	0	0	1	1	1	58	156	23.833	1	1	85	4	4	5	5	4	4	5	5	5	5	4	5	5	5	5	5	5	5	5	5	5	5	5	5	3
194	2	2	2515	50	1	2	4	1	#NULL!	1	#NULL!	#NULL!	#NULL!	#NULL!	#NULL!	#NULL!	1	1	67	150	29.7778	1	1	64	4	4	3	4	4	5	4	4	5	4	4	5	4	3	4	4	3	4	3	3	4	4	4	4	4
195	2	2	2502	63	1	2	3	1	#NULL!	1	#NULL!	#NULL!	#NULL!	#NULL!	#NULL!	#NULL!	1	1	57	160	22.2656	1	1	92	4	3	4	4	4	3	4	4	4	3	3	4	4	2	3	3	3	3	3	3	4	3	4	5	2
196	2	2	2505	60	1	2	4	1	#NULL!	1	#NULL!	#NULL!	#NULL!	#NULL!	#NULL!	#NULL!	1	2	57	160	22.2656	1	1	86	3	3	3	4	4	4	4	4	5	3	2	4	4	4	4	4	4	4	4	3	4	4	5	5	4
197	2	2	2513	52	1	5	2	1	#NULL!	1	#NULL!	#NULL!	#NULL!	#NULL!	#NULL!	#NULL!	1	1	56	152	24.2382	1	5	87	3	3	4	4	4	4	5	5	5	4	2	3	4	3	4	4	3	2	4	4	4	4	4	4	4
198	2	2	2500	65	1	2	2	1	#NULL!	1	#NULL!	#NULL!	#NULL!	#NULL!	#NULL!	#NULL!	1	1	67	150	29.7778	1	1	100	4	5	4	5	5	3	4	4	5	4	1	4	5	5	4	5	3	4	4	5	4	4	5	4	4
199	2	2	2511	54	1	2	3	1	#NULL!	1	#NULL!	#NULL!	#NULL!	#NULL!	#NULL!	#NULL!	1	1	80	150	35.5556	1	1	100	4	3	4	4	4	4	3	4	5	4	3	4	4	3	4	4	3	4	3	4	4	4	4	5	3
200	2	2	2512	53	1	2	2	1	#NULL!	1	#NULL!	#NULL!	#NULL!	#NULL!	#NULL!	#NULL!	1	1	52	155	21.6441	1	4	86	4	5	4	5	4	4	4	4	3	4	5	4	4	4	4	4	3	5	4	4	4	5	5	5	3
201	2	2	2503	62	1	4	2	3	#NULL!	1	#NULL!	#NULL!	#NULL!	#NULL!	#NULL!	#NULL!	1	1	52	156	21.3675	1	4	87	4	2	5	5	4	4	4	4	3	4	3	5	5	4	4	4	3	4	4	5	4	5	5	5	3
202	2	2	2502	63	1	2	2	1	#NULL!	1	#NULL!	#NULL!	#NULL!	#NULL!	#NULL!	#NULL!	1	1	43	160	16.7969	1	1	62	4	5	5	3	4	4	4	4	4	4	3	5	5	5	4	4	3	5	3	4	5	5	5	5	3
203	2	2	2521	44	1	2	2	1	#NULL!	1	#NULL!	#NULL!	#NULL!	#NULL!	#NULL!	#NULL!	1	1	65	150	28.8889	1	1	80	3	5	4	3	4	3	4	4	5	4	4	4	4	4	4	5	3	4	2	3	4	3	4	3	3
204	2	1	2537	28	1	1	4	2	#NULL!	1	#NULL!	#NULL!	#NULL!	#NULL!	#NULL!	#NULL!	1	1	62	168	21.9671	1	5	82	3	5	4	4	4	4	4	4	3	4	3	4	4	4	5	4	4	4	4	4	4	4	4	4	4
205	2	1	2503	62	1	1	2	1	#NULL!	1	#NULL!	#NULL!	#NULL!	#NULL!	#NULL!	#NULL!	1	1	50	160	19.5312	1	1	60	3	3	3	4	3	4	4	4	2	4	3	4	4	4	4	4	4	4	4	4	4	3	4	4	4
206	2	1	2499	66	1	2	2	1	#NULL!	1	#NULL!	#NULL!	#NULL!	#NULL!	#NULL!	#NULL!	1	1	60	165	22.0386	1	1	91	3	5	4	3	4	4	4	4	5	4	4	4	4	4	4	4	3	4	3	4	4	4	4	4	3
207	2	1	2512	53	1	2	4	3	#NULL!	2	0	0	0	0	0	1	1	1	60	172	20.2812	4	5	71	5	4	5	5	5	5	4	4	5	4	4	4	5	4	4	5	4	3	4	4	4	5	5	5	5
208	2	2	2500	65	1	5	2	1	#NULL!	1	#NULL!	#NULL!	#NULL!	#NULL!	#NULL!	#NULL!	1	1	48	150	21.3333	1	1	74	3	3	4	3	4	4	4	4	4	4	4	4	4	4	4	4	4	3	4	4	4	4	4	4	5
209	2	1	2536	29	1	1	4	1	#NULL!	2	0	0	0	0	0	1	1	1	92	165	33.7925	4	4	100	2	5	4	3	3	4	3	3	5	2	4	3	4	4	3	4	3	4	4	4	4	3	4	4	3
210	2	2	2522	43	1	2	4	8	#NULL!	2	0	0	0	0	0	1	1	2	70	144	33.7577	1	5	101	4	1	4	2	2	4	4	4	5	4	2	4	4	4	4	3	3	4	4	4	4	4	4	4	4
211	2	2	2511	54	1	5	2	1	#NULL!	1	#NULL!	#NULL!	#NULL!	#NULL!	#NULL!	#NULL!	2	1	45	150	20	1	4	66	4	1	4	4	3	4	4	3	5	4	2	4	4	4	3	3	4	4	4	4	4	4	4	4	4
212	2	1	2494	71	1	2	2	2	#NULL!	1	#NULL!	#NULL!	#NULL!	#NULL!	#NULL!	#NULL!	1	1	51	160	19.9219	5	4	71	4	3	4	5	4	4	4	4	2	4	2	4	4	3	3	3	3	4	3	3	4	4	4	4	3
213	2	2	2519	46	1	3	6	7	#NULL!	1	#NULL!	#NULL!	#NULL!	#NULL!	#NULL!	#NULL!	1	1	64	150	28.4444	1	1	81	3	3	4	4	4	4	4	4	2	5	3	4	4	4	3	4	3	4	4	3	3	4	5	5	1
214	2	1	2519	46	1	2	6	6	#NULL!	1	#NULL!	#NULL!	#NULL!	#NULL!	#NULL!	#NULL!	1	1	50	160	19.5312	5	5	75	5	3	5	5	4	4	3	3	3	4	2	3	4	4	4	4	2	4	4	4	4	4	4	4	4
254	2	2	2518	47	1	2	5	4	#NULL!	1	#NULL!	#NULL!	#NULL!	#NULL!	#NULL!	#NULL!	1	1	45	160	17.5781	1	1	70	3	4	4	4	3	3	3	3	4	3	4	4	4	3	3	3	2	4	3	2	4	2	4	4	4
256	2	2	2505	60	1	2	2	1	#NULL!	1	#NULL!	#NULL!	#NULL!	#NULL!	#NULL!	#NULL!	1	1	73	165	26.8136	1	1	91	4	5	4	5	5	4	5	5	5	5	3	4	5	5	5	5	4	3	4	5	5	4	5	5	3
482	2	1	2518	47	1	2	4	2	#NULL!	1	#NULL!	#NULL!	#NULL!	#NULL!	#NULL!	#NULL!	1	1	58	162	22.1003	4	5	77	3	2	4	4	4	4	4	4	4	4	3	4	4	4	5	5	5	4	4	4	3	4	5	5	5
483	2	1	2505	60	1	2	2	1	#NULL!	1	#NULL!	#NULL!	#NULL!	#NULL!	#NULL!	#NULL!	1	1	55	168	19.487	5	5	75	4	4	4	2	4	4	5	4	3	4	3	5	3	5	5	4	3	4	4	4	5	5	5	5	2
484	2	1	2521	44	1	1	6	1	#NULL!	1	#NULL!	#NULL!	#NULL!	#NULL!	#NULL!	#NULL!	1	1	70	180	21.6049	1	5	84	5	2	5	5	5	5	5	5	4	5	4	5	5	5	5	5	5	5	5	5	5	5	5	5	5
485	2	2	2509	56	1	2	2	3	#NULL!	2	0	0	0	0	0	1	1	1	70	160	27.3437	1	1	92	3	5	3	4	4	4	4	4	5	4	3	4	4	4	4	4	3	3	2	3	4	4	4	4	4
486	2	2	2511	54	1	2	2	1	#NULL!	2	0	0	0	0	0	1	1	2	49	155	20.3954	1	1	81	2	5	4	3	2	4	4	4	3	4	2	4	4	3	3	4	3	4	4	3	3	4	4	4	4
487	2	1	2512	53	1	2	2	1	#NULL!	2	0	0	0	0	#NULL!	1	1	1	80	163	30.1103	1	1	98	3	3	3	4	4	3	4	4	4	4	3	2	3	3	3	3	3	3	4	3	4	4	4	4	4
488	2	2	2501	64	1	3	3	3	#NULL!	1	#NULL!	#NULL!	#NULL!	#NULL!	#NULL!	#NULL!	1	1	60	164	22.3081	1	1	86	3	2	4	3	3	4	3	4	4	4	3	3	4	3	4	4	3	4	4	3	4	5	4	4	1
489	2	1	2518	47	1	2	2	1	#NULL!	1	#NULL!	#NULL!	#NULL!	#NULL!	#NULL!	#NULL!	1	1	65	160	25.3906	4	5	88	4	5	4	4	5	5	5	4	5	4	5	4	4	4	4	4	3	4	4	4	2	4	5	4	5
490	2	2	2517	48	1	4	5	3	#NULL!	1	#NULL!	#NULL!	#NULL!	#NULL!	#NULL!	#NULL!	1	1	48	142	23.8048	1	1	70	3	5	2	2	2	3	4	4	5	4	4	2	4	4	4	3	3	4	4	4	3	4	4	4	4
491	2	2	2529	36	1	2	2	3	#NULL!	1	#NULL!	#NULL!	#NULL!	#NULL!	#NULL!	#NULL!	1	1	64	156	26.2985	1	1	97	3	3	4	4	4	4	3	3	5	3	2	3	3	3	4	4	3	4	4	3	3	4	4	2	3
492	2	2	2496	69	1	4	2	3	#NULL!	1	#NULL!	#NULL!	#NULL!	#NULL!	#NULL!	#NULL!	1	1	36	150	16	1	1	60	3	3	4	5	3	3	3	4	4	4	3	4	5	5	5	5	3	5	4	5	4	5	5	5	3
493	2	2	2503	62	1	2	2	1	#NULL!	2	0	0	0	0	0	1	1	1	51	155	21.2279	1	4	77	3	3	5	3	4	5	5	5	2	5	2	5	5	5	5	5	3	5	5	4	4	3	5	3	3
494	2	1	2505	60	1	2	2	1	#NULL!	1	#NULL!	#NULL!	#NULL!	#NULL!	#NULL!	#NULL!	1	1	65	165	23.8751	4	4	92	5	3	5	5	5	5	5	5	3	5	2	5	5	4	5	5	5	5	4	5	5	5	1	5	5
495	2	2	2522	43	1	3	4	1	#NULL!	1	#NULL!	#NULL!	#NULL!	#NULL!	#NULL!	#NULL!	1	1	58	160	22.6562	1	4	78	5	3	5	5	5	5	5	5	5	5	3	5	5	4	4	4	4	4	3	3	3	5	1	5	5
496	2	2	2525	40	1	3	2	1	#NULL!	1	#NULL!	#NULL!	#NULL!	#NULL!	#NULL!	#NULL!	1	1	89	160	34.7656	1	4	106	5	5	5	5	5	5	5	5	5	5	2	5	5	5	5	5	4	4	4	2	3	5	1	5	5
497	2	1	2521	44	1	2	3	1	#NULL!	1	#NULL!	#NULL!	#NULL!	#NULL!	#NULL!	#NULL!	1	1	54	150	24	1	1	82	4	3	4	4	4	4	4	4	4	4	3	3	4	4	4	4	3	4	2	4	4	4	4	4	3
498	2	2	2518	47	1	2	2	1	#NULL!	1	#NULL!	#NULL!	#NULL!	#NULL!	#NULL!	#NULL!	1	1	65	150	28.8889	1	5	92	3	3	3	4	4	4	4	4	5	4	3	4	3	3	4	4	3	4	2	3	3	4	4	4	3
499	2	2	2517	48	1	2	4	1	#NULL!	1	#NULL!	#NULL!	#NULL!	#NULL!	#NULL!	#NULL!	1	2	69	150	30.6667	1	5	92	2	3	4	4	4	4	4	4	4	4	3	4	4	2	4	4	3	4	4	3	4	4	4	4	4
500	2	2	2516	49	1	2	2	1	#NULL!	1	#NULL!	#NULL!	#NULL!	#NULL!	#NULL!	#NULL!	1	1	68	160	26.5625	1	1	92	3	3	4	4	4	4	4	4	4	4	2	4	4	4	4	5	2	4	3	3	4	4	4	4	4
501	2	2	2515	50	1	2	3	1	#NULL!	1	#NULL!	#NULL!	#NULL!	#NULL!	#NULL!	#NULL!	2	1	69	152	29.865	1	5	96	3	3	4	4	4	4	5	5	4	4	2	4	4	4	3	3	3	4	4	4	4	4	5	5	4
502	2	2	2520	45	1	2	2	1	#NULL!	1	#NULL!	#NULL!	#NULL!	#NULL!	#NULL!	#NULL!	1	1	50	150	22.2222	1	1	70	3	4	4	4	4	3	4	4	5	4	5	4	4	4	4	5	2	4	3	3	4	4	4	4	4
503	2	2	2520	45	1	1	4	1	#NULL!	1	#NULL!	#NULL!	#NULL!	#NULL!	#NULL!	#NULL!	1	1	57	162	21.7193	1	5	78	4	5	4	3	4	3	4	4	2	4	4	3	4	3	3	4	3	3	4	3	3	3	3	4	2
504	2	2	2496	69	1	4	2	1	#NULL!	1	#NULL!	#NULL!	#NULL!	#NULL!	#NULL!	#NULL!	1	1	45	150	20	1	1	73	3	3	3	4	4	3	4	3	5	3	3	3	4	3	3	3	3	4	2	3	3	4	3	4	4
505	2	2	2510	55	1	4	2	1	#NULL!	1	#NULL!	#NULL!	#NULL!	#NULL!	#NULL!	#NULL!	1	1	57	152	24.6711	1	1	91	3	5	4	3	4	4	4	3	5	4	4	5	4	5	3	2	2	4	4	3	3	4	5	5	1
506	2	2	2494	71	1	4	2	1	#NULL!	1	#NULL!	#NULL!	#NULL!	#NULL!	#NULL!	#NULL!	1	1	64	165	23.5078	5	1	95	5	3	4	4	4	3	5	4	3	4	2	4	4	4	4	4	4	4	4	4	4	4	4	4	4
507	2	2	2516	49	1	2	2	1	#NULL!	1	#NULL!	#NULL!	#NULL!	#NULL!	#NULL!	#NULL!	1	1	53	146	24.864	1	1	80	4	3	3	3	4	3	3	3	5	3	5	3	3	4	3	3	3	3	3	3	3	3	4	4	4
508	2	2	2520	45	1	2	4	1	#NULL!	1	#NULL!	#NULL!	#NULL!	#NULL!	#NULL!	#NULL!	1	1	58	165	21.3039	1	5	80	4	4	4	4	4	4	4	4	4	4	4	4	4	4	4	4	3	4	3	4	4	3	4	4	4
509	2	1	2507	58	1	2	4	1	#NULL!	1	#NULL!	#NULL!	#NULL!	#NULL!	#NULL!	#NULL!	1	1	52	160	20.3125	5	5	70	5	5	4	5	4	4	3	4	5	2	3	3	3	4	5	5	3	3	5	2	4	4	4	4	1
510	2	1	2505	60	1	2	4	1	#NULL!	1	#NULL!	#NULL!	#NULL!	#NULL!	#NULL!	#NULL!	1	1	53	153	22.6409	5	5	75	5	5	4	5	3	4	4	4	5	4	3	4	4	4	5	5	4	3	5	3	5	4	3	5	1
511	2	1	2507	58	1	2	2	1	#NULL!	1	#NULL!	#NULL!	#NULL!	#NULL!	#NULL!	#NULL!	1	1	48	162	18.2899	5	5	71	4	4	4	5	5	5	5	5	5	3	3	4	4	4	3	3	4	4	4	3	4	5	5	5	4
512	2	1	2498	67	1	4	3	1	#NULL!	1	#NULL!	#NULL!	#NULL!	#NULL!	#NULL!	#NULL!	1	1	69	168	24.4473	1	5	90	4	3	4	4	4	4	4	4	5	4	4	4	4	3	4	4	4	4	3	4	4	4	4	4	3
513	2	1	2507	58	1	1	3	1	#NULL!	1	#NULL!	#NULL!	#NULL!	#NULL!	#NULL!	#NULL!	1	1	60	160	23.4375	4	5	85	4	4	4	4	4	4	3	4	4	4	2	4	4	4	4	4	3	4	4	4	4	4	4	4	3
514	2	1	2502	63	1	2	4	1	#NULL!	1	#NULL!	#NULL!	#NULL!	#NULL!	#NULL!	#NULL!	1	1	60	160	23.4375	1	5	80	4	3	4	5	5	4	4	4	3	4	2	4	4	4	4	4	4	4	5	4	5	5	4	4	4
515	2	1	2507	58	1	2	2	1	#NULL!	1	#NULL!	#NULL!	#NULL!	#NULL!	#NULL!	#NULL!	1	1	59	170	20.4152	5	5	76	4	4	3	5	4	4	4	4	5	4	5	3	3	3	4	3	3	4	3	3	4	4	3	3	3
516	2	1	2507	58	1	2	2	1	#NULL!	2	0	0	0	0	0	1	1	1	60	170	20.7612	4	4	85	1	3	3	5	5	5	5	3	4	3	3	3	5	5	5	3	5	5	5	5	5	3	5	3	3
517	2	1	2513	52	1	2	3	1	#NULL!	1	#NULL!	#NULL!	#NULL!	#NULL!	#NULL!	#NULL!	1	1	63	160	24.6094	5	5	82	3	4	3	4	4	4	4	5	4	4	4	4	4	4	3	3	2	5	4	4	4	4	4	4	4
518	2	1	2501	64	1	2	2	1	#NULL!	1	#NULL!	#NULL!	#NULL!	#NULL!	#NULL!	#NULL!	1	1	54	171	18.4672	1	4	77	3	4	3	5	3	5	5	4	4	3	4	3	2	5	3	2	5	3	5	5	5	3	4	5	5
519	2	1	2516	49	1	2	4	1	#NULL!	1	#NULL!	#NULL!	#NULL!	#NULL!	#NULL!	#NULL!	1	1	48	167	17.2111	1	1	78	3	5	3	4	3	3	3	3	5	3	4	3	4	3	4	4	3	5	4	3	4	5	3	4	4
520	2	1	2508	57	1	2	4	1	#NULL!	1	#NULL!	#NULL!	#NULL!	#NULL!	#NULL!	#NULL!	1	1	50	155	20.8117	5	1	68	4	3	4	4	4	4	4	4	2	4	5	4	4	4	4	4	3	4	4	4	4	4	4	4	4
521	2	1	2512	53	1	2	4	1	#NULL!	1	#NULL!	#NULL!	#NULL!	#NULL!	#NULL!	#NULL!	1	1	56	159	22.151	1	5	77	4	3	4	4	3	4	4	4	4	4	4	4	4	4	4	4	3	4	4	3	4	4	4	4	4
522	2	2	2526	39	1	2	2	1	#NULL!	1	#NULL!	#NULL!	#NULL!	#NULL!	#NULL!	#NULL!	1	1	53	158	21.2306	1	1	73	3	2	4	4	4	3	3	4	5	4	3	3	3	4	4	4	4	3	3	4	4	4	4	4	4
523	2	2	2507	58	1	2	3	1	#NULL!	1	#NULL!	#NULL!	#NULL!	#NULL!	#NULL!	#NULL!	1	1	45	157	18.2563	1	1	70	4	5	3	4	3	3	3	3	4	3	5	3	3	3	4	3	3	4	4	4	4	4	4	4	3
524	2	2	2511	54	1	2	2	1	#NULL!	1	#NULL!	#NULL!	#NULL!	#NULL!	#NULL!	#NULL!	1	1	69	154	29.0943	1	1	106	3	4	3	4	4	3	3	3	5	3	4	3	3	3	3	4	4	3	3	3	3	4	3	4	3
525	2	2	2521	44	1	2	2	2	#NULL!	1	#NULL!	#NULL!	#NULL!	#NULL!	#NULL!	#NULL!	1	1	52	151	22.806	1	1	79	4	4	4	2	3	3	3	3	5	3	4	4	4	4	4	4	3	3	3	3	3	4	4	4	3
526	2	2	2494	71	1	2	2	1	#NULL!	1	#NULL!	#NULL!	#NULL!	#NULL!	#NULL!	#NULL!	1	2	52	158	20.83	1	1	82	3	4	4	4	3	3	3	3	4	3	3	3	3	3	3	3	3	4	4	4	4	2	4	2	3
527	2	1	2490	75	1	2	2	1	#NULL!	1	#NULL!	#NULL!	#NULL!	#NULL!	#NULL!	#NULL!	1	1	73	170	25.2595	1	5	91	4	4	4	4	4	4	4	4	5	3	5	4	4	4	4	4	2	4	4	2	4	4	4	4	3
528	2	1	2512	53	1	2	6	4	#NULL!	2	0	0	0	0	0	1	1	1	76	172	25.6896	1	1	86	4	4	3	4	3	3	3	3	4	3	5	3	3	3	4	3	3	4	3	3	3	3	3	5	3
529	2	2	2514	51	1	5	2	1	#NULL!	1	#NULL!	#NULL!	#NULL!	#NULL!	#NULL!	#NULL!	1	1	46	162	17.5278	1	1	74	4	5	4	3	4	4	4	4	3	4	4	4	4	4	4	4	4	5	5	4	4	3	4	4	4
530	2	2	2498	67	1	2	2	1	#NULL!	1	#NULL!	#NULL!	#NULL!	#NULL!	#NULL!	#NULL!	1	1	56	149	25.2241	1	1	90	3	3	4	4	4	4	5	5	5	4	2	3	4	5	4	4	3	5	5	5	5	4	4	4	4
651	2	1	2499	66	1	2	2	1	#NULL!	1	#NULL!	#NULL!	#NULL!	#NULL!	#NULL!	#NULL!	1	1	73	165	26.8136	1	1	93	3	2	4	3	3	4	3	4	4	3	4	3	2	2	3	3	2	4	2	3	3	3	3	3	3
652	2	2	2497	68	1	2	2	1	#NULL!	1	#NULL!	#NULL!	#NULL!	#NULL!	#NULL!	#NULL!	1	1	70	155	29.1363	1	1	96	3	3	3	3	3	4	3	4	3	4	3	3	3	3	4	4	3	4	3	3	4	4	3	4	3
653	2	2	2503	62	1	2	4	1	#NULL!	1	#NULL!	#NULL!	#NULL!	#NULL!	#NULL!	#NULL!	1	1	61	165	22.4059	1	1	84	3	4	3	3	3	3	3	4	5	3	3	3	4	3	4	3	3	4	4	4	3	4	4	4	4
654	2	2	2496	69	1	2	2	1	#NULL!	1	#NULL!	#NULL!	#NULL!	#NULL!	#NULL!	#NULL!	1	1	70	163	26.3465	1	1	106	4	2	4	3	4	4	4	3	5	4	2	3	3	4	4	3	3	4	4	4	4	4	4	4	4
655	2	2	2525	40	1	2	3	1	#NULL!	1	#NULL!	#NULL!	#NULL!	#NULL!	#NULL!	#NULL!	1	1	70	150	31.1111	1	1	90	5	3	5	4	5	5	5	5	2	4	3	4	4	4	4	5	4	4	5	4	4	4	5	4	5
656	2	2	2514	51	1	1	2	1	#NULL!	1	#NULL!	#NULL!	#NULL!	#NULL!	#NULL!	#NULL!	1	1	53	155	22.0604	1	1	81	3	3	5	5	5	5	5	5	3	4	3	4	5	5	5	4	5	3	4	5	4	5	5	5	5
657	2	1	2527	38	1	1	3	1	#NULL!	1	#NULL!	#NULL!	#NULL!	#NULL!	#NULL!	#NULL!	1	1	58	160	22.6562	5	5	79	4	3	4	3	4	4	4	4	3	4	3	4	4	4	4	4	4	4	4	4	4	4	4	4	3
658	2	1	2507	58	1	2	3	1	#NULL!	1	#NULL!	#NULL!	#NULL!	#NULL!	#NULL!	#NULL!	1	1	49	165	17.9982	4	5	70	4	2	4	4	4	4	4	4	3	4	3	4	4	4	4	4	3	4	4	4	4	4	4	4	3
659	2	1	2493	72	1	2	2	1	#NULL!	1	#NULL!	#NULL!	#NULL!	#NULL!	#NULL!	#NULL!	1	1	52	162	19.8141	4	4	78	4	2	3	4	4	4	4	4	4	3	3	3	3	3	3	3	3	4	5	4	4	3	3	3	3
660	2	1	2505	60	1	2	2	4	#NULL!	1	#NULL!	#NULL!	#NULL!	#NULL!	#NULL!	#NULL!	1	1	52	165	19.1001	5	5	77	4	5	3	2	4	4	4	4	5	3	5	3	3	4	4	3	3	3	5	3	4	3	3	3	3
661	2	2	2510	55	1	2	2	1	#NULL!	1	#NULL!	#NULL!	#NULL!	#NULL!	#NULL!	#NULL!	1	1	55	155	22.8928	1	5	85	3	5	4	5	4	4	4	5	3	3	3	4	4	4	3	3	3	3	1	3	4	4	4	3	3
662	2	2	2513	52	1	2	4	2	#NULL!	1	#NULL!	#NULL!	#NULL!	#NULL!	#NULL!	#NULL!	1	1	73	165	26.8136	5	5	88	2	5	5	5	5	5	4	3	2	5	3	5	5	5	5	5	2	5	5	4	3	5	5	5	2
663	2	2	2515	50	1	2	2	1	#NULL!	1	#NULL!	#NULL!	#NULL!	#NULL!	#NULL!	#NULL!	1	1	82	165	30.1194	4	5	101	4	3	4	4	4	4	4	4	4	4	2	4	4	4	4	3	4	4	4	4	4	4	4	4	3
664	2	1	2512	53	1	2	2	1	#NULL!	1	#NULL!	#NULL!	#NULL!	#NULL!	#NULL!	#NULL!	1	1	42	160	16.4062	1	1	69	4	2	4	4	4	4	4	4	3	4	3	4	4	4	4	4	4	4	4	4	4	4	4	4	3
665	2	1	2514	51	1	2	2	1	#NULL!	1	#NULL!	#NULL!	#NULL!	#NULL!	#NULL!	#NULL!	1	1	70	172	23.6614	1	5	82	4	3	3	5	5	4	4	4	3	4	2	3	3	4	4	4	4	4	5	3	4	4	4	4	4
666	2	1	2510	55	1	2	2	4	#NULL!	1	#NULL!	#NULL!	#NULL!	#NULL!	#NULL!	#NULL!	1	1	67	159	26.5021	1	5	94	4	3	5	5	5	5	5	5	4	5	3	5	5	5	5	5	3	5	5	3	5	5	5	5	4
667	2	1	2520	45	1	2	3	1	#NULL!	1	#NULL!	#NULL!	#NULL!	#NULL!	#NULL!	#NULL!	1	1	55	158	22.0317	4	5	80	4	3	4	4	4	4	4	4	4	5	2	5	5	4	4	4	4	4	5	4	5	5	5	5	3
668	2	1	2512	53	1	2	2	1	#NULL!	1	#NULL!	#NULL!	#NULL!	#NULL!	#NULL!	#NULL!	1	1	62	160	24.2187	5	1	80	3	2	3	3	3	3	3	3	5	3	2	4	4	3	4	3	3	4	4	4	3	4	3	4	4
669	2	1	2511	54	1	2	2	1	#NULL!	1	#NULL!	#NULL!	#NULL!	#NULL!	#NULL!	#NULL!	1	1	52	159	20.5688	1	1	83	2	5	4	4	4	4	3	3	5	3	5	3	4	4	4	4	4	5	5	3	4	5	4	4	4
670	2	2	2519	46	1	2	3	7	#NULL!	1	#NULL!	#NULL!	#NULL!	#NULL!	#NULL!	#NULL!	1	1	66	169	23.1084	1	1	78	5	4	4	4	5	4	5	5	4	4	2	4	4	4	4	2	4	4	5	4	4	4	4	4	4
671	2	2	2496	69	1	2	2	1	#NULL!	1	#NULL!	#NULL!	#NULL!	#NULL!	#NULL!	#NULL!	1	1	45	140	22.9592	1	1	78	4	4	4	4	4	4	4	4	4	4	2	4	4	4	4	4	4	4	4	4	4	4	4	4	3
672	2	1	2513	52	1	2	2	1	#NULL!	1	#NULL!	#NULL!	#NULL!	#NULL!	#NULL!	#NULL!	1	1	55	160	21.4844	1	5	77	4	5	4	4	4	4	4	4	5	4	3	4	4	3	4	4	3	4	4	3	4	4	4	4	4
673	2	2	2513	52	1	2	2	1	#NULL!	1	#NULL!	#NULL!	#NULL!	#NULL!	#NULL!	#NULL!	1	2	78	155	32.4662	1	1	93	3	4	4	2	3	3	3	3	4	3	3	3	4	3	4	4	4	3	3	3	3	4	3	3	3
674	2	2	2514	51	1	2	4	1	#NULL!	1	#NULL!	#NULL!	#NULL!	#NULL!	#NULL!	#NULL!	1	1	78	160	30.4687	1	1	105	3	4	4	4	4	4	4	5	5	3	4	4	4	4	4	4	5	5	4	4	4	4	4	4	4
675	2	1	2507	58	1	2	4	1	#NULL!	1	#NULL!	#NULL!	#NULL!	#NULL!	#NULL!	#NULL!	1	1	75	165	27.5482	1	1	103	3	4	3	3	3	3	3	3	5	2	1	3	3	3	3	4	3	4	3	3	4	4	3	4	4
676	2	2	2515	50	1	1	3	2	#NULL!	1	#NULL!	#NULL!	#NULL!	#NULL!	#NULL!	#NULL!	2	1	74	155	30.8012	1	1	104	3	4	3	3	3	3	3	3	3	3	2	3	3	3	4	3	3	4	3	3	3	4	3	4	3
677	2	2	2510	55	1	2	4	1	#NULL!	1	#NULL!	#NULL!	#NULL!	#NULL!	#NULL!	#NULL!	2	1	70	155	29.1363	1	1	92	3	4	3	4	3	4	3	3	3	3	2	4	4	3	3	3	3	4	3	3	3	3	4	4	3
678	2	2	2506	59	1	2	5	3	#NULL!	1	#NULL!	#NULL!	#NULL!	#NULL!	#NULL!	#NULL!	1	1	69	150	30.6667	1	5	95	3	5	5	5	5	5	5	5	5	5	5	5	5	5	5	5	5	5	5	5	5	5	5	5	2
679	2	2	2510	55	1	2	3	1	#NULL!	1	#NULL!	#NULL!	#NULL!	#NULL!	#NULL!	#NULL!	1	1	53	150	23.5556	1	5	91	3	5	4	5	5	4	5	5	5	5	3	5	5	4	5	5	4	5	5	5	5	5	5	5	3
680	2	2	2517	48	1	1	4	1	#NULL!	1	#NULL!	#NULL!	#NULL!	#NULL!	#NULL!	#NULL!	1	1	52	150	23.1111	1	4	93	4	5	4	5	5	5	5	5	5	4	5	4	4	4	4	4	4	4	4	4	4	4	4	4	3
681	2	2	2509	56	1	2	2	1	#NULL!	1	#NULL!	#NULL!	#NULL!	#NULL!	#NULL!	#NULL!	1	1	66	164	24.539	1	1	83	4	3	4	3	4	3	4	4	4	3	3	4	3	3	4	4	3	4	3	3	4	3	3	4	4
682	2	2	2509	56	1	1	3	1	#NULL!	1	#NULL!	#NULL!	#NULL!	#NULL!	#NULL!	#NULL!	1	1	46	150	20.4444	1	1	71	4	4	4	4	4	4	4	4	3	4	5	4	5	4	4	4	4	5	4	3	4	4	4	4	4
683	2	2	2508	57	1	1	2	1	#NULL!	1	#NULL!	#NULL!	#NULL!	#NULL!	#NULL!	#NULL!	2	1	50	158	20.0288	1	1	72	4	5	4	4	4	5	4	4	5	4	5	4	4	4	4	5	3	4	3	4	4	4	4	4	2
684	2	2	2505	60	1	1	2	2	#NULL!	1	#NULL!	#NULL!	#NULL!	#NULL!	#NULL!	#NULL!	1	1	53	160	20.7031	1	1	72	4	4	4	4	4	4	5	5	2	4	2	4	3	3	3	3	3	4	4	3	3	4	4	4	2
685	2	2	2505	60	1	4	2	2	#NULL!	1	#NULL!	#NULL!	#NULL!	#NULL!	#NULL!	#NULL!	1	1	62	150	27.5556	1	1	95	4	4	4	4	5	4	4	4	5	4	5	4	4	4	4	4	4	5	3	4	3	4	4	4	2
686	2	2	2510	55	1	4	2	1	#NULL!	1	#NULL!	#NULL!	#NULL!	#NULL!	#NULL!	#NULL!	1	1	40	155	16.6493	1	1	74	3	2	3	4	3	3	3	3	4	3	5	3	4	4	3	3	3	5	4	4	4	3	3	3	2
687	2	2	2509	56	1	2	2	1	#NULL!	1	#NULL!	#NULL!	#NULL!	#NULL!	#NULL!	#NULL!	1	2	54	160	21.0937	1	1	80	3	3	4	4	4	4	4	4	5	4	4	4	4	4	3	4	4	4	4	4	4	4	4	4	5
688	2	2	2509	56	1	2	2	2	#NULL!	1	#NULL!	#NULL!	#NULL!	#NULL!	#NULL!	#NULL!	1	1	52	166	18.8707	1	1	68	3	3	3	2	3	4	4	3	4	4	3	4	4	4	3	3	3	3	2	2	3	4	3	4	3
689	2	2	2508	57	1	4	2	1	#NULL!	1	#NULL!	#NULL!	#NULL!	#NULL!	#NULL!	#NULL!	1	1	65	153	27.7671	1	1	90	4	3	4	2	3	3	3	3	4	3	2	3	3	4	3	3	3	4	3	2	3	4	3	4	3
690	2	2	2510	55	1	2	2	1	#NULL!	1	#NULL!	#NULL!	#NULL!	#NULL!	#NULL!	#NULL!	2	1	68	155	28.3039	1	5	94	4	3	4	4	4	5	4	3	3	4	3	4	3	3	4	3	2	4	4	4	3	4	4	4	4
691	2	2	2506	59	1	4	2	3	#NULL!	1	#NULL!	#NULL!	#NULL!	#NULL!	#NULL!	#NULL!	1	1	51	153	21.7865	1	1	84	4	2	4	4	4	4	4	3	5	3	5	4	4	4	4	4	4	3	3	4	4	4	4	4	4
692	2	2	2510	55	1	2	2	1	#NULL!	1	#NULL!	#NULL!	#NULL!	#NULL!	#NULL!	#NULL!	1	1	58	165	21.3039	1	1	86	3	3	3	4	3	4	4	3	5	4	5	4	4	4	3	3	4	4	4	4	3	4	3	4	3
693	2	2	2516	49	1	2	2	1	#NULL!	1	#NULL!	#NULL!	#NULL!	#NULL!	#NULL!	#NULL!	1	1	65	153	27.7671	1	4	88	4	3	3	4	4	4	3	3	4	4	2	4	3	3	4	4	3	3	4	3	4	3	4	3	4
694	2	2	2508	57	1	1	2	1	#NULL!	1	#NULL!	#NULL!	#NULL!	#NULL!	#NULL!	#NULL!	1	1	52	159	20.5688	1	4	76	3	5	3	3	3	2	4	4	4	3	3	3	4	3	4	3	3	4	3	2	4	4	4	4	4
695	2	2	2507	58	1	2	2	1	#NULL!	1	#NULL!	#NULL!	#NULL!	#NULL!	#NULL!	#NULL!	1	1	79	165	29.0174	1	5	103	3	4	3	4	3	4	3	3	5	3	4	4	4	4	3	4	3	4	4	4	3	4	4	4	4
[truncated: 1 more columns]
